# Supplementary material for: Sll1252 Coordinates Electron Transport between Plastoquinone and Cytochrome b6/f Complex in Synechocystis PCC 6803
Source: MDPI journal article supplement (doi:10.3390/genes14122151), 2023-11-28
Supplement: s1 [file s1]

## Supplementary Material

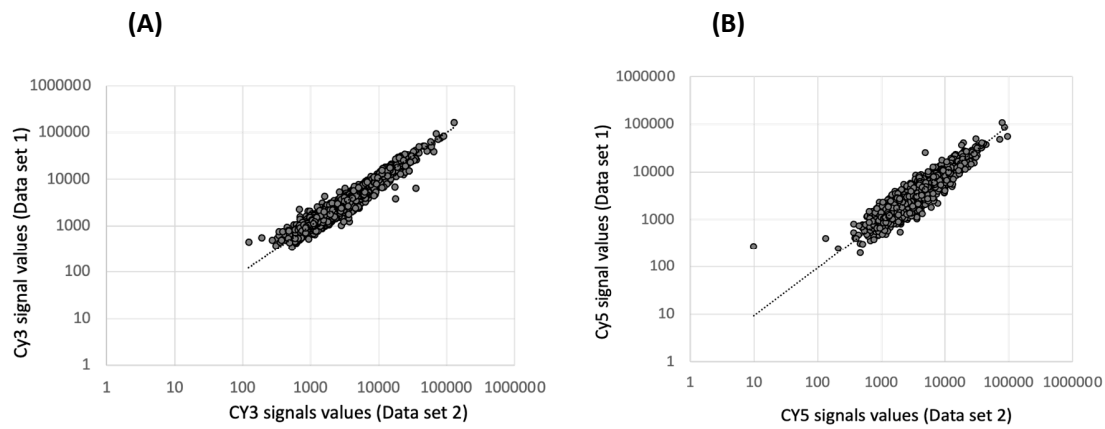

**Figure S2:** Comparison of DNA microarray hybridization signal intensities between two data sets. The wild type *Synechocystis* (WT) and  $\Delta sl11252$  cells were grown for 48 h, at  $70 \mu\text{mol photons m}^{-2} \text{s}^{-1}$ . cDNA synthesized from WT and  $\Delta sl11252$  RNA were labelled with Cy3 and Cy5 fluorescence dyes respectively and hybridized to Cyano-chip ver. 1.6. The TIFF images were processed and, Cy3 and Cy5 signal intensities for each feature were converted into numerical signals. Both Cy3 and Cy5 signal values were globally normalized, and the fold changes were calculated for two data sets. (A) scatter plot of Cy3 signal values of all the genes from data set-1 versus Cy3 signal values of data set-2. (B) scatter plot of Cy5 signal values of two data sets. The line of best fit in both the cases passes through the origin signifying high correlation between two data sets.
