# Supplementary material for: Sll1252 Coordinates Electron Transport between Plastoquinone and Cytochrome b6/f Complex in Synechocystis PCC 6803
Source: Genes (Basel). 2023 Nov 28;14(12):2151. doi: 10.3390/genes14122151 (PMC10743179; doi:10.3390/genes14122151)
Supplement: Supplementary file 1 [file genes-14-02151-s001.zip › Supplementary Material, Table S1- sll1252 mutant vs WT DNA microarray raw data 28 Nov 2023.xlsx]

## Sheet: Delta-sll1252 vs WT70µmol light
	∆sll1252 versus Wild-type grown at illumination of 70 µmol/ m2/ S, DNA microarray raw data
	Cy3	cy3	Cy5	Cy5																						ORF	GENE ID	FUNCTION	Cy3	Average Cy5/Cy3	SD	Gra X-axis	Gra Y-axis
ORF	Signal Median	Background Median	Signal Median	Background Median		ORF	genename	description	cyanobase	cyanobase_def	Cy3 Sig	Cy3-BG	cy3 Sig-BG	cy3+compensate	Normalised Cy3			Cy5 Sig	Cy5-BG	cy5 Sig-BG	Normalised Cy5		ratio
sll0517	1341	956	973	533.5	1	sll0517	rbpA	RNA binding protein	rbp1,rbpA	putative RNA binding protein	1341	956	385	435	0.016522			973	533.5	439.5	0.0212859		1.28834			sll0517	rbp1,rbpA	putative RNA binding protein	0.0153862	1.23199	0.0796895	0.0153862	1.23199
slr0192	1465	966.5	944	583	1	slr0192				hypothetical protein	1465	966.5	498.5	548.5	0.0208329			944	583	361	0.017484		0.839247			slr0192		hypothetical protein	0.0191926	0.824799	0.0204332	0.0191926	0.824799
slr0443	1330	991.5	954	553.5	1	slr0443				hypothetical protein	1330	991.5	338.5	388.5	0.0147559			954	553.5	400.5	0.0193971		1.31453			slr0443		hypothetical protein	0.0145417	1.18246	0.186777	0.0145417	1.18246
slr1376	1893	930.5	1402	564	1	slr1376				hypothetical protein	1893	930.5	962.5	1012.5	0.0384564			1402	564	838	0.0405861		1.05538			slr1376		hypothetical protein	0.0309683	0.993831	0.0870424	0.0309683	0.993831
sll0661	1715	1023	792	523	1	sll0661	ycf35	ycf35 gene product	ycf35	Ycf35	1715	1023	692	742	0.0281824			792	523	269	0.0130282		0.462283			sll0661	ycf35	Ycf35	0.0285153	0.523747	0.0869232	0.0285153	0.523747
sll0780	1338	987	700	528.5	1	sll0780				hypothetical protein	1338	987	351	401	0.0152306			700	528.5	171.5	0.00830611		0.545355			sll0780		hypothetical protein	0.0150301	0.753111	0.293811	0.0150301	0.753111
slr0815	1448	1025	786	516	1	slr0815				hypothetical protein	1448	1025	423	473	0.0179653			786	516	270	0.0130767		0.727884			slr0815		hypothetical protein	0.0160885	0.839834	0.158322	0.0160885	0.839834
slr1037	1251	1030	743	542.5	1	slr1037		regulatory components of sensory transduction system	rre10	two-component response regulator (CheY subfamily)	1251	1030	221	271	0.010293			743	542.5	200.5	0.00971064		0.943419			slr1037	rre10	two-component response regulator (CheY subfamily)	0.0106883	0.985258	0.0591701	0.0106883	0.985258
sll1769	2026	991	1724	570	1	sll1769				hypothetical protein	2026	991	1035	1085	0.0412101			1724	570	1154	0.0558907		1.35624			sll1769		hypothetical protein	0.0362263	1.44446	0.124762	0.0362263	1.44446
sll1813	3592	1020.5	2910	569	1	sll1813	rpl15	50S ribosomal protein L15	rplO, rpl15	50S ribosomal protein L15	3592	1020.5	2571.5	2621.5	0.0995689			2910	569	2341	0.11338		1.1387			sll1813	rplO, rpl15	50S ribosomal protein L15	0.0899383	1.16578	0.0382894	0.0899383	1.16578
sml0005	1366	1021	763	548	1	sml0005	psbK	photosystem II PsbK protein	psbK	photosystem II PsbK protein	1366	1021	345	395	0.0150028			763	548	215	0.0104129		0.694066			sml0005	psbK	photosystem II PsbK protein	0.0142983	0.827466	0.188656	0.0142983	0.827466
slr0500	1871	1021	1203	553	1	slr0500	hisB	imidazoleglycerol-phosphate dehydratase	hisB	imidazoleglycerol-phosphate dehydratase	1871	1021	850	900	0.0341835			1203	553	650	0.0314809		0.920938			slr0500	hisB	imidazoleglycerol-phosphate dehydratase	0.0326551	0.904982	0.0225643	0.0326551	0.904982
sml0006	1429	969	903	521	1	sml0006	rpl36	50S ribosomal protein L36	rpmJ, rpl36	50S ribosomal protein L36	1429	969	460	510	0.0193706			903	521	382	0.0185011		0.955108			sml0006	rpmJ, rpl36	50S ribosomal protein L36	0.0204599	0.968095	0.0183655	0.0204599	0.968095
slr0051	1707	955	1004	541	1	slr0051	icfA	carbonic anhydrase	ecaB, icfA	periplasmic beta-type carbonic anhydrase	1707	955	752	802	0.0304613			1004	541	463	0.0224241		0.73615			slr0051	ecaB, icfA	periplasmic beta-type carbonic anhydrase	0.0272314	0.709549	0.037619	0.0272314	0.709549
ssl2138	1375	938	889	544	1	ssl2138				hypothetical protein	1375	938	437	487	0.0184971			889	544	345	0.0167091		0.903336			ssl2138		hypothetical protein	0.0172426	0.933615	0.0428205	0.0172426	0.933615
sll0625	1569	940.5	1010	552.5	1	sll0625				hypothetical protein	1569	940.5	628.5	678.5	0.0257706			1010	552.5	457.5	0.0221577		0.859806			sll0625		hypothetical protein	0.0243454	0.806633	0.0751978	0.0243454	0.806633
sll1219	1272.5	936	863.5	528	1	sll1219				hypothetical protein	1272.5	936	336.5	386.5	0.0146799			863.5	528	335.5	0.016249		1.10688			sll1219		hypothetical protein	0.0141562	1.11204	0.00729674	0.0141562	1.11204
sll1744	6871	938.5	8795	551	1	sll1744	rpl1	50S ribosomal protein L1	rplA, rpl1	50S ribosomal protein L1	6871	938.5	5932.5	5982.5	0.227225			8795	551	8244	0.399274		1.75717			sll1744	rplA, rpl1	50S ribosomal protein L1	0.170961	1.69263	0.0912791	0.170961	1.69263
slr0249	1346	997.5	924	561	1	slr0249				hypothetical protein	1346	997.5	348.5	398.5	0.0151357			924	561	363	0.0175809		1.16155			slr0249		hypothetical protein	0.0133124	1.02564	0.192198	0.0133124	1.02564
slr1197	1135	948	755	554	1	slr1197		hypothetical protein	smf	smf protein	1135	948	187	237	0.00900165			755	554	201	0.00973485		1.08145			slr1197	smf	smf protein	0.00872957	0.952771	0.181982	0.00872957	0.952771
ssl0707	1501	937	924	560	1	ssl0707	glnB	nitrogen regulatory protein P-II	glnB	nitrogen regulatory protein P-II	1501	937	564	614	0.0233207			924	560	364	0.0176293		0.755949			ssl0707	glnB	nitrogen regulatory protein P-II	0.0204751	0.722805	0.046873	0.0204751	0.722805
slr0776	1882	928	1270	569	1	slr0776	lpxD	UDP-3-o-[3-hydroxymyristoyl] glucosamine n-acyltransferase	lpxD	UDP-3-O-[3-hydroxymyristoyl] glucosamine N-acyltransferase	1882	928	954	1004	0.0381336			1270	569	701	0.0339509		0.890315			slr0776	lpxD	UDP-3-O-[3-hydroxymyristoyl] glucosamine N-acyltransferase	0.0316468	0.909415	0.0270121	0.0316468	0.909415
ssl3383	1378	921.5	904	566.5	1	ssl3383				hypothetical protein	1378	921.5	456.5	506.5	0.0192377			904	566.5	337.5	0.0163458		0.849677			ssl3383		hypothetical protein	0.016184	0.741359	0.153184	0.016184	0.741359
slr1983	1240	931	850	568	1	slr1983		regulatory components of sensory transduction system	rre22	two-component response regulator	1240	931	309	359	0.0136354			850	568	282	0.0136579		1.00165			slr1983	rre22	two-component response regulator	0.013547	0.843189	0.224092	0.013547	0.843189
slr1767	1255	979.5	586	391.5	1	slr1767				hypothetical protein	1255	979.5	275.5	325.5	0.012363			586	391.5	194.5	0.00942004		0.761953			slr1767		hypothetical protein	0.0126501	0.890778	0.182187	0.0126501	0.890778
sll1158	1284	1045	614	413	1	sll1158				hypothetical protein	1284	1045	239	289	0.0109767			614	413	201	0.00973485		0.886865			sll1158		hypothetical protein	0.0123432	0.969703	0.11715	0.0123432	0.969703
slr1982	1515	1024.5	762	446	1	slr1982		regulatory components of sensory transduction system	rre21	two-component response regulator (CheY subfamily)	1515	1024.5	490.5	540.5	0.0205291			762	446	316	0.0153045		0.745505			slr1982	rre21	two-component response regulator (CheY subfamily)	0.0194365	0.931418	0.262921	0.0194365	0.931418
sll0809	1284	1059	647	453	1	sll0809				putative lipoate-protein ligase A	1284	1059	225	275	0.010445			647	453	194	0.00939583		0.899556			sll0809		putative lipoate-protein ligase A	0.0108994	0.963604	0.0905775	0.0108994	0.963604
sll0328	1521	1057.5	748	465	1	sll0328				hypothetical protein	1521	1057.5	463.5	513.5	0.0195036			748	465	283	0.0137063		0.702757			sll0328		hypothetical protein	0.0164521	0.856071	0.216819	0.0164521	0.856071
slr1315	1734.5	1061	941.5	469	1	slr1315				hypothetical protein	1734.5	1061	673.5	723.5	0.0274797			941.5	469	472.5	0.0228842		0.832765			slr1315		hypothetical protein	0.0248138	0.914645	0.115795	0.0248138	0.914645
sll0911	1263	997	706	515.5	1	sll0911				hypothetical protein	1263	997	266	316	0.0120022			706	515.5	190.5	0.00922632		0.768718			sll0911		hypothetical protein	0.0110215	0.920388	0.214493	0.0110215	0.920388
sll0172	2348	1044	1038	506	1	sll0172				periplasmic protein, function unknown	2348	1044	1304	1354	0.0514272			1038	506	532	0.0257659		0.501017			sll0172		periplasmic protein, function unknown	0.0458146	0.604628	0.146528	0.0458146	0.604628
sll0775	1183	1030	633	542	1	sll0775				hypothetical protein	1183	1030	153	203	0.00771028			633	542	91	0.00440732		0.571616			sll0775		hypothetical protein	0.00792941	0.69922	0.180459	0.00792941	0.69922
slr0120	1306	963	762	522	1	slr0120		hypothetical protein		hypothetical protein	1306	963	343	393	0.0149268			762	522	240	0.0116237		0.778714			slr0120		hypothetical protein	0.0142796	0.838132	0.0840298	0.0142796	0.838132
sll0609	1337	1041	729	520.5	1	sll0609				hypothetical protein	1337	1041	296	346	0.0131417			729	520.5	208.5	0.0100981		0.768404			sll0609		hypothetical protein	0.0129236	0.951046	0.258295	0.0129236	0.951046
slr0775	1845	1039	1068	543.5	1	slr0775	secF	protein-export membrane protein SecF	secF	protein-export membrane protein SecF	1845	1039	806	856	0.0325123			1068	543.5	524.5	0.0254026		0.781324			slr0775	secF	protein-export membrane protein SecF	0.0298499	0.9067	0.177309	0.0298499	0.9067
ssl1690	3249	1057	1891	536.5	1	ssl1690				hypothetical protein	3249	1057	2192	2242	0.0851549			1891	536.5	1354.5	0.0656013		0.770376			ssl1690		hypothetical protein	0.0824706	0.875995	0.149367	0.0824706	0.875995
slr1201	1624	1026	950	545.5	1	slr1201			urtC, livM	ABC-type urea transport system permease protein	1624	1026	598	648	0.0246121			950	545.5	404.5	0.0195908		0.795981			slr1201	urtC, livM	ABC-type urea transport system permease protein	0.022849	0.912779	0.165176	0.022849	0.912779
ssl2501	1985	1010.5	2281	563.5	1	ssl2501				hypothetical protein	1985	1010.5	974.5	1024.5	0.0389122			2281	563.5	1717.5	0.0831821		2.13769			ssl2501		hypothetical protein	0.0349422	2.27068	0.188083	0.0349422	2.27068
sll1025	2249	1022	1218	557.5	1	sll1025				hypothetical protein	2249	1022	1227	1277	0.0485026			1218	557.5	660.5	0.0319894		0.65954			sll1025		hypothetical protein	0.0443234	0.731342	0.101543	0.0443234	0.731342
slr1100	1306.5	999.5	729	510.5	1	slr1100				hypothetical protein	1306.5	999.5	307	357	0.0135595			729	510.5	218.5	0.0105824		0.780446			slr1100		hypothetical protein	0.0123119	0.896502	0.164129	0.0123119	0.896502
slr1122	1655	996	1038	544	1	slr1122				hypothetical protein	1655	996	659	709	0.026929			1038	544	494	0.0239255		0.888465			slr1122		hypothetical protein	0.0260542	0.882504	0.00842918	0.0260542	0.882504
ssr0332	1631	950.5	1031	555	1	ssr0332				hypothetical protein	1631	950.5	680.5	730.5	0.0277456			1031	555	476	0.0230537		0.830895			ssr0332		hypothetical protein	0.0260473	0.813006	0.0252985	0.0260473	0.813006
slr0220	1807	952.5	1189	585	1	slr0220	glyS	glycyl-tRNA synthetase beta chain	glyS	glycyl-tRNA synthetase beta chain	1807	952.5	854.5	904.5	0.0343544			1189	585	604	0.029253		0.851506			slr0220	glyS	glycyl-tRNA synthetase beta chain	0.0317268	0.804544	0.0664142	0.0317268	0.804544
slr1563	1494	941.5	952	561.5	1	slr1563		hypothetical protein		hypothetical protein	1494	941.5	552.5	602.5	0.022884			952	561.5	390.5	0.0189127		0.826463			slr1563		hypothetical protein	0.0206236	0.841279	0.020953	0.0206236	0.841279
ssl1633	1279	969	1048	569.5	1	ssl1633		CAB/ELIP/HLIP superfamily	hliC, scpB	CAB/ELIP/HLIP superfamily	1279	969	310	360	0.0136734			1048	569.5	478.5	0.0231748		1.69488			ssl1633	hliC, scpB	CAB/ELIP/HLIP superfamily	0.0130543	1.75874	0.0903192	0.0130543	1.75874
sll0241	1530	978	1046	551.5	1	sll0241				hypothetical protein	1530	978	552	602	0.022865			1046	551.5	494.5	0.0239497		1.04744			sll0241		hypothetical protein	0.0197741	1.05676	0.0131818	0.0197741	1.05676
smr0005	1285	913.5	790	568.5	1	smr0005	psaM	photosystem I PsaM subunit	psaM	photosystem I reaction center subunit XII	1285	913.5	371.5	421.5	0.0160093			790	568.5	221.5	0.0107277		0.670094			smr0005	psaM	photosystem I reaction center subunit XII	0.0136623	0.734279	0.0907718	0.0136623	0.734279
sll0018	17484	941	10476	565	1	sll0018	cbbA or cfxA	fructose-1,6-bisphosphate aldolase	cbbA, cfxA, fbaA, fda	fructose-bisphosphate aldolase, class II	17484	941	16543	16593	0.63023			10476	565	9911	0.480011		0.761644			sll0018	cbbA, cfxA, fbaA, fda	fructose-bisphosphate aldolase, class II	0.492587	0.801617	0.0565308	0.492587	0.801617
ssl2733	1153	896	756	555	1	ssl2733				hypothetical protein	1153	896	257	307	0.0116604			756	555	201	0.00973485		0.834867			ssl2733		hypothetical protein	0.0106961	0.819286	0.0220338	0.0106961	0.819286
slr1344	1366	900.5	884	541	1	slr1344		hypothetical protein		putative ABC transporter permease protein	1366	900.5	465.5	515.5	0.0195795			884	541	343	0.0166122		0.848447			slr1344		putative ABC transporter permease protein	0.0166446	0.848817	0.000523088	0.0166446	0.848817
sll0546	1524	938.5	1009	581	1	sll0546		hypothetical protein		hypothetical protein	1524	938.5	585.5	635.5	0.0241373			1009	581	428	0.0207289		0.858791			sll0546		hypothetical protein	0.019609	0.805119	0.0759035	0.019609	0.805119
sll1933	1636	1035	737	394.5	1	sll1933	dnaJ	DnaJ protein	dnaJ	DnaJ protein, heat shock protein 40, molecular chaperone	1636	1035	601	651	0.0247261			737	394.5	342.5	0.016588		0.670871			sll1933	dnaJ	DnaJ protein, heat shock protein 40, molecular chaperone	0.0214867	0.769737	0.139818	0.0214867	0.769737
slr0376	1771	1035	645	415	1	slr0376				hypothetical protein	1771	1035	736	786	0.0298536			645	415	230	0.0111394		0.373134			slr0376		hypothetical protein	0.029486	0.43479	0.0871947	0.029486	0.43479
sll0017	1862	996	1358	441	1	sll0017	hemL or gsa	glutamate-1-semialdehyde 2,1- aminomutase	hemL, gsa	glutamate-1-semialdehyde 2,1-aminomutase	1862	996	866	916	0.0347912			1358	441	917	0.0444122		1.27654			sll0017	hemL, gsa	glutamate-1-semialdehyde 2,1-aminomutase	0.0317811	1.4673	0.269779	0.0317811	1.4673
ssl1004	1336	1025	767	454	1	ssl1004		hypothetical protein		hypothetical protein	1336	1025	311	361	0.0137114			767	454	313	0.0151592		1.1056			ssl1004		hypothetical protein	0.0134402	1.24083	0.191248	0.0134402	1.24083
sll1367	1565	1076	754	454	1	sll1367				hypothetical protein	1565	1076	489	539	0.0204721			754	454	300	0.0145296		0.709728			sll1367		hypothetical protein	0.0199583	0.890536	0.255702	0.0199583	0.890536
ssr0349	1379	1063	694	456.5	1	ssr0349				hypothetical protein	1379	1063	316	366	0.0139013			694	456.5	237.5	0.0115026		0.82745			ssr0349		hypothetical protein	0.0133131	1.05274	0.318606	0.0133131	1.05274
sll0848	1302	1054	699	519.5	1	sll0848	dnaA	chromosomal replication initiator protein DnaA	dnaA	chromosomal replication initiator protein DnaA	1302	1054	248	298	0.0113185			699	519.5	179.5	0.00869356		0.768082			sll0848	dnaA	chromosomal replication initiator protein DnaA	0.0112686	0.90981	0.200434	0.0112686	0.90981
ssr2201	1286	1013	706	498.5	1	ssr2201				hypothetical protein	1286	1013	273	323	0.0122681			706	498.5	207.5	0.0100497		0.819172			ssr2201		hypothetical protein	0.0116565	0.926099	0.151218	0.0116565	0.926099
sll0237	1395	1030	800	494.5	1	sll0237				putative ABC-type iron transport system substrate-binding protein	1395	1030	365	415	0.0157624			800	494.5	305.5	0.014796		0.938691			sll0237		putative ABC-type iron transport system substrate-binding protein	0.0146395	0.996449	0.0816829	0.0146395	0.996449
ssl3451	1473	993	828	522	1	ssl3451				hypothetical protein	1473	993	480	530	0.0201303			828	522	306	0.0148202		0.736216			ssl3451		hypothetical protein	0.0240161	0.687751	0.0685393	0.0240161	0.687751
sll1024	1381	1010	784	510	1	sll1024				hypothetical protein	1381	1010	371	421	0.0159903			784	510	274	0.0132704		0.829904			sll1024		hypothetical protein	0.0237323	0.740555	0.126359	0.0237323	0.740555
ssr2998	1491	1006.5	890	527	1	ssr2998		hypothetical protein		hypothetical protein	1491	1006.5	484.5	534.5	0.0203012			890	527	363	0.0175809		0.866001			ssr2998		hypothetical protein	0.021128	0.893905	0.039462	0.021128	0.893905
slr1267	1649	1023	881	555	1	slr1267	mrdB or rodA	rod-shape-determining protein	mrdB, rodA	probable cell division protein	1649	1023	626	676	0.0256756			881	555	326	0.0157889		0.614937			slr1267	mrdB, rodA	probable cell division protein	0.0270302	0.708526	0.132355	0.0270302	0.708526
sll0047	2012	1024	1276	529	1	sll0047			ycf12	hypothetical protein	2012	1024	988	1038	0.039425			1276	529	747	0.0361788		0.917662			sll0047	ycf12	hypothetical protein	0.0344262	1.00708	0.126461	0.0344262	1.00708
sll1516	1288	999	815	571	1	sll1516				hypothetical protein	1288	999	289	339	0.0128758			815	571	244	0.0118174		0.917803			sll1516		hypothetical protein	0.0138623	0.950879	0.0467765	0.0138623	0.950879
sll0205	1349	998	823	543	1	sll0205				hypothetical protein	1349	998	351	401	0.0152306			823	543	280	0.013561		0.890375			sll0205		hypothetical protein	0.0144026	0.924403	0.0481219	0.0144026	0.924403
slr0662	1662	1002	921	526.5	1	slr0662	speA	arginine decarboxylase	speA	arginine decarboxylase	1662	1002	660	710	0.026967			921	526.5	394.5	0.0191065		0.708513			slr0662	speA	arginine decarboxylase	0.0255711	0.854511	0.206471	0.0255711	0.854511
slr1470	4597	1015	2807	507	1	slr1470				hypothetical protein	4597	1015	3582	3632	0.137949			2807	507	2300	0.111394		0.807498			slr1470		hypothetical protein	0.129287	0.842556	0.0495794	0.129287	0.842556
slr0474	1419	972.5	845	548	1	slr0474			rcp1, rre27	response regulator for phytochrome 1 (Cph1), two-component response regulator (CheY subfamily)	1419	972.5	446.5	496.5	0.0188579			845	548	297	0.0143843		0.762775			slr0474	rcp1, rre27	response regulator for phytochrome 1 (Cph1), two-component response regulator (CheY subfamily)	0.0174713	0.842788	0.113155	0.0174713	0.842788
sll1562	1245	956	760	532	1	sll1562				hypothetical protein	1245	956	289	339	0.0128758			760	532	228	0.0110425		0.857619			sll1562		hypothetical protein	0.012279	0.87848	0.0295014	0.012279	0.87848
sll0364	1328	953	825	516.5	1	sll0364				hypothetical protein	1328	953	375	425	0.0161422			825	516.5	308.5	0.0149413		0.925605			sll0364		hypothetical protein	0.0155728	0.93423	0.0121973	0.0155728	0.93423
slr2128	1223	915	781	555.5	1	slr2128		hypothetical protein		hypothetical protein	1223	915	308	358	0.0135974			781	555.5	225.5	0.0109214		0.803199			slr2128		hypothetical protein	0.0126108	0.833524	0.0428869	0.0126108	0.833524
slr1339	1437	953	1021	543.5	1	slr1339				hypothetical protein	1437	953	484	534	0.0202822			1021	543.5	477.5	0.0231263		1.14023			slr1339		hypothetical protein	0.0189269	0.994676	0.205841	0.0189269	0.994676
sll0864	1150	950	729	513	1	sll0864				hypothetical protein	1150	950	200	250	0.00949542			729	513	216	0.0104613		1.10172			sll0864		hypothetical protein	0.0103281	0.934804	0.236061	0.0103281	0.934804
sll1763	1807	921	1240	527	1	sll1763				hypothetical protein	1807	921	886	936	0.0355508			1240	527	713	0.0345321		0.971344			sll1763		hypothetical protein	0.0326243	0.969827	0.00214604	0.0326243	0.969827
sll0984	1148	908.5	751.5	552.5	1	sll0984				hypothetical protein	1148	908.5	239.5	289.5	0.0109957			751.5	552.5	199	0.00963799		0.876524			sll0984		hypothetical protein	0.0103541	0.851545	0.0353258	0.0103541	0.851545
slr0980	1259	895.5	886	574.5	1	slr0980		hypothetical protein		hypothetical protein	1259	895.5	363.5	413.5	0.0157054			886	574.5	311.5	0.0150866		0.960599			slr0980		hypothetical protein	0.0129504	0.872748	0.124239	0.0129504	0.872748
sll1675	1406	917.5	918	563	1	sll1675				hypothetical protein	1406	917.5	488.5	538.5	0.0204531			918	563	355	0.0171934		0.840625			sll1675		hypothetical protein	0.0178151	0.78089	0.0844779	0.0178151	0.78089
ssr3383	1732	950.5	1057	594	1	ssr3383	apcC	phycobilisome LC linker polypeptide	apcC	phycobilisome small core linker polypeptide	1732	950.5	781.5	831.5	0.0315818			1057	594	463	0.0224241		0.710032			ssr3383	apcC	phycobilisome small core linker polypeptide	0.0224043	0.750219	0.0568319	0.0224043	0.750219
sll0733	1297	1009	557.5	400.5	1	sll0733				hypothetical protein	1297	1009	288	338	0.0128378			557.5	400.5	157	0.00760384		0.592301			sll0733		hypothetical protein	0.010358	0.640195	0.0677321	0.010358	0.640195
sll0478	1384	1005	640	437	1	sll0478				hypothetical protein	1384	1005	379	429	0.0162941			640	437	203	0.00983172		0.60339			sll0478		hypothetical protein	0.0160446	0.791168	0.265558	0.0160446	0.791168
slr2071	1362	1013.5	894	457.5	1	slr2071				hypothetical protein	1362	1013.5	348.5	398.5	0.0151357			894	457.5	436.5	0.0211406		1.39674			slr2071		hypothetical protein	0.0142875	1.59153	0.275474	0.0142875	1.59153
sll0301	1490	1025	711	445	1	sll0301				hypothetical protein	1490	1025	465	515	0.0195606			711	445	266	0.0128829		0.658618			sll0301		hypothetical protein	0.020188	0.786916	0.181441	0.020188	0.786916
sll1388	1560	1054	859	480.5	1	sll1388				hypothetical protein	1560	1054	506	556	0.0211178			859	480.5	378.5	0.0183316		0.868061			sll1388		hypothetical protein	0.0205708	1.04896	0.255828	0.0205708	1.04896
sll1537	1905	1030	1319	505	1	sll1537				hypothetical protein	1905	1030	875	925	0.035133			1319	505	814	0.0394237		1.12213			sll1537		hypothetical protein	0.0321547	1.40954	0.406462	0.0321547	1.40954
slr1812	1794	972.5	1134	531.5	1	slr1812		hypothetical protein		hypothetical protein	1794	972.5	821.5	871.5	0.033101			1134	531.5	602.5	0.0291803		0.881554			slr1812		hypothetical protein	0.0329924	1.03738	0.220368	0.0329924	1.03738
sll1605	1546	1015	859	498	1	sll1605	fabZ or sefA	(3R)-hydroxymyristol acyl carrier protein dehydrase	fabZ, sefA	(3R)-hydroxymyristoyl-[acyl carrier protein] dehydratase	1546	1015	531	581	0.0220673			859	498	361	0.017484		0.792301			sll1605	fabZ, sefA	(3R)-hydroxymyristoyl-[acyl carrier protein] dehydratase	0.0240192	0.818081	0.0364576	0.0240192	0.818081
sll1112	1655	985	1013	525	1	sll1112	aroQ	carbonic 3-dehydroquinase	aroQ	carbonic 3-dehydroquinase	1655	985	670	720	0.0273468			1013	525	488	0.0236349		0.864265			sll1112	aroQ	carbonic 3-dehydroquinase	0.0251045	1.02491	0.227189	0.0251045	1.02491
slr1542	1542	971	886	506	1	slr1542		hypothetical protein		2C-methyl-D-erythritol 2,4-cyclodiphosphate synthase	1542	971	571	621	0.0235866			886	506	380	0.0184042		0.780282			slr1542		2C-methyl-D-erythritol 2,4-cyclodiphosphate synthase	0.0227514	0.75174	0.0403637	0.0227514	0.75174
sll1940	1632	996	872	550	1	sll1940				hypothetical protein	1632	996	636	686	0.0260554			872	550	322	0.0155951		0.598537			sll1940		hypothetical protein	0.026187	0.693068	0.133686	0.026187	0.693068
sll1514	1328	985	1934	529	1	sll1514	hspA	spore protein sp21	hspA, hsp17	16.6 kDa small heat shock protein, molecular chaperone	1328	985	343	393	0.0149268			1934	529	1405	0.0680471		4.55872			sll1514	hspA, hsp17	16.6 kDa small heat shock protein, molecular chaperone	0.014463	5.46108	1.27613	0.014463	5.46108
slr0725	1285	997.5	761	554	1	slr0725		hypothetical protein		hypothetical protein	1285	997.5	287.5	337.5	0.0128188			761	554	207	0.0100254		0.782089			slr0725		hypothetical protein	0.0117774	0.909197	0.179758	0.0117774	0.909197
sll0565	1368	989	849	564	1	sll0565				hypothetical protein	1368	989	379	429	0.0162941			849	564	285	0.0138032		0.847124			sll0565		hypothetical protein	0.0166818	0.969496	0.17306	0.0166818	0.969496
slr2075	2644	994	5321	576	1	slr2075	groES	10kD chaperonin	groES	10 kD chaperonin, GroES protein	2644	994	1650	1700	0.0645688			5321	576	4745	0.22981		3.55915			slr2075	groES	10 kD chaperonin, GroES protein	0.0641448	3.92199	0.513132	0.0641448	3.92199
sll0042	1622	1001	949	521.5	1	sll0042	tar or cheM	methyl-accepting chemotaxis protein II	pixJ2, pisJ2, tar, cheM	methyl-accepting chemotaxis protein for positive phototaxis	1622	1001	621	671	0.0254857			949	521.5	427.5	0.0207047		0.812406			sll0042	pixJ2, pisJ2, tar, cheM	methyl-accepting chemotaxis protein for positive phototaxis	0.0249946	0.850242	0.0535083	0.0249946	0.850242
sll1101	3865	993	3094	531	1	sll1101	rps10	30S ribosomal protein S10	rpsJ, rps10	30S ribosomal protein S10	3865	993	2872	2922	0.110982			3094	531	2563	0.124131		1.11848			sll1101	rpsJ, rps10	30S ribosomal protein S10	0.106014	1.18232	0.0902891	0.106014	1.18232
sll0892	1288	923.5	851	553.5	1	sll0892	panD	aspartate 1-decarboxylase	panD	aspartate 1-decarboxylase	1288	923.5	364.5	414.5	0.0157434			851	553.5	297.5	0.0144086		0.915212			sll0892	panD	aspartate 1-decarboxylase	0.0147844	0.92812	0.0182547	0.0147844	0.92812
sll1573	1259	933	797	543	1	sll1573				hypothetical protein	1259	933	326	376	0.0142811			797	543	254	0.0123018		0.861401			sll1573		hypothetical protein	0.0142657	0.81473	0.0660025	0.0142657	0.81473
sll1618	2799	983.5	1950	548.5	1	sll1618				hypothetical protein	2799	983.5	1815.5	1865.5	0.0708548			1950	548.5	1401.5	0.0678776		0.957982			sll1618		hypothetical protein	0.068485	0.954934	0.00431012	0.068485	0.954934
slr1093	2028	919.5	1441	560.5	1	slr1093	folK	7, 8-dihydro-6-hydroxymethylpterin-pyrophosphokinase	folK	7,8-dihydro-6-hydroxymethylpterin-pyrophosphokinase	2028	919.5	1108.5	1158.5	0.0440018			1441	560.5	880.5	0.0426445		0.969154			slr1093	folK	7,8-dihydro-6-hydroxymethylpterin-pyrophosphokinase	0.040673	0.957039	0.0171326	0.040673	0.957039
slr1837	1772	910.5	1098	528	1	slr1837		regulatory components of sensory transduction system	rre16	two-component response regulator (OmpR subfamily) Manganese sensing response regulator	1772	910.5	861.5	911.5	0.0346203			1098	528	570	0.0276063		0.797402			slr1837	rre16	two-component response regulator (OmpR subfamily) Manganese sensing response regulator	0.0314349	0.889857	0.130751	0.0314349	0.889857
sll1063	1645	898.5	1172	522	1	sll1063				hypothetical protein	1645	898.5	746.5	796.5	0.0302524			1172	522	650	0.0314809		1.04061			sll1063		hypothetical protein	0.0269435	1.0178	0.032251	0.0269435	1.0178
slr0974	2052	924	2036	537.5	1	slr0974	infC	initiation factor IF-3	infC	translation initiation factor IF-3	2052	924	1128	1178	0.0447424			2036	537.5	1498.5	0.0725755		1.62207			slr0974	infC	translation initiation factor IF-3	0.0389966	1.71353	0.129341	0.0389966	1.71353
sll1522	1603	884.5	1003	527.5	1	sll1522	pgsA	CDP-diacylglycerol--glycerol-3-phosphate 3-phosphatidyltransferase	pgsA	CDP-diacylglycerol-glycerol-3-phosphate 3-phosphatidyltransferase	1603	884.5	718.5	768.5	0.0291889			1003	527.5	475.5	0.0230295		0.78898			sll1522	pgsA	CDP-diacylglycerol-glycerol-3-phosphate 3-phosphatidyltransferase	0.0254077	0.858213	0.0979094	0.0254077	0.858213
slr0613	1274	918.5	935	550	1	slr0613				hypothetical protein	1274	918.5	355.5	405.5	0.0154016			935	550	385	0.0186464		1.21068			slr0613		hypothetical protein	0.0150866	1.07455	0.192516	0.0150866	1.07455
sll0493	1805	946.5	1251	562	1	sll0493		hypothetical protein		hypothetical protein	1805	946.5	858.5	908.5	0.0345063			1251	562	689	0.0333697		0.967061			sll0493		hypothetical protein	0.0283271	0.924682	0.0599329	0.0283271	0.924682
sll1849	1287	922	954	575	1	sll1849				hypothetical protein	1287	922	365	415	0.0157624			954	575	379	0.0183558		1.16453			sll1849		hypothetical protein	0.0141181	1.10376	0.0859363	0.0141181	1.10376
sll1810	5469	949.5	5799	608	1	sll1810	rpl6	50S ribosomal protein L6	rplF, rpl6	50S ribosomal protein L6	5469	949.5	4519.5	4569.5	0.173557			5799	608	5191	0.251411		1.44858			sll1810	rplF, rpl6	50S ribosomal protein L6	0.104997	1.37749	0.100539	0.104997	1.37749
sll1544	1302	997	586	412	1	sll1544		regulatory components of sensory transduction system	rre40	two-component response regulator (NarL subfamily)	1302	997	305	355	0.0134835			586	412	174	0.00842719		0.625			sll1544	rre40	two-component response regulator (NarL subfamily)	0.0147069	0.785667	0.227217	0.0147069	0.785667
slr0318	6787	1035	2611	435	1	slr0318				hypothetical protein	6787	1035	5752	5802	0.22037			2611	435	2176	0.105388		0.478234			slr0318		hypothetical protein	0.209068	0.576268	0.138641	0.209068	0.576268
sll0508	1309	997	629	436	1	sll0508				hypothetical protein	1309	997	312	362	0.0137494			629	436	193	0.0093474		0.679842			sll0508		hypothetical protein	0.0133916	0.919226	0.33854	0.0133916	0.919226
slr0630	1739	1010.5	993	464	1	slr0630				hypothetical protein	1739	1010.5	728.5	778.5	0.0295687			993	464	529	0.0256206		0.866476			slr0630		hypothetical protein	0.0276251	0.954914	0.12507	0.0276251	0.954914
sll0083	2802	1031.5	1319	462	1	sll0083	gmhA	phosphoheptose isomerase	gmhA	phosphoheptose isomerase	2802	1031.5	1770.5	1820.5	0.0691456			1319	462	857	0.0415063		0.600274			sll0083	gmhA	phosphoheptose isomerase	0.0651878	0.690107	0.127042	0.0651878	0.690107
sll0296	3075	1044.5	1808	471.5	1	sll0296		unidentified open reading frame		hypothetical protein	3075	1044.5	2030.5	2080.5	0.0790208			1808	471.5	1336.5	0.0647295		0.819145			sll0296		hypothetical protein	0.0740742	0.961306	0.201047	0.0740742	0.961306
slr1368	1457	1025	846	508.5	1	slr1368	cbiT or cobL	precorrin decarbocylase	cbiT, cobL	precorrin-8W decarboxylase	1457	1025	432	482	0.0183072			846	508.5	337.5	0.0163458		0.892866			slr1368	cbiT, cobL	precorrin-8W decarboxylase	0.0180938	1.00803	0.162865	0.0180938	1.00803
slr0742	2457	978	2022	528	1	slr0742				hypothetical protein	2457	978	1479	1529	0.058074			2022	528	1494	0.0723576		1.24596			slr0742		hypothetical protein	0.0541874	1.38275	0.193463	0.0541874	1.38275
sll1639	1595	927	913	499.5	1	sll1639	ureD	urease accessory protein D	ureD	urease accessory protein D	1595	927	668	718	0.0272708			913	499.5	413.5	0.0200267		0.734362			sll1639	ureD	urease accessory protein D	0.0272389	0.803629	0.0979573	0.0272389	0.803629
slr1655	5088	965.5	2548	532.5	1	slr1655	psaL	photosystem I subunit XI	psaL	photosystem I reaction center subunit XI	5088	965.5	4122.5	4172.5	0.158478			2548	532.5	2015.5	0.0976149		0.615951			slr1655	psaL	photosystem I reaction center subunit XI	0.145914	0.715072	0.140179	0.145914	0.715072
sll1324	5010	950	3481	551.5	1	sll1324	atpF	ATP synthase subunit b	atpF	ATP synthase B chain (subunit I) of CF(0)	5010	950	4060	4110	0.156105			3481	551.5	2929.5	0.141882		0.908889			sll1324	atpF	ATP synthase B chain (subunit I) of CF(0)	0.142912	0.96885	0.0847975	0.142912	0.96885
sll1822	6688	979	5155	522.5	1	sll1822	rps9	30S ribosomal protein S9	rpsI, rps9	30S ribosomal protein S9	6688	979	5709	5759	0.218736			5155	522.5	4632.5	0.224362		1.02572			sll1822	rpsI, rps9	30S ribosomal protein S9	0.194754	1.22059	0.27559	0.194754	1.22059
sll1578	24069	1005	7170	529.5	1	sll1578	cpcA	phycocyanin a subunit	cpcA	phycocyanin alpha subunit	24069	1005	23064	23114	0.877908			7170	529.5	6640.5	0.321613		0.366341			sll1578	cpcA	phycocyanin alpha subunit	0.816133	0.424744	0.0825944	0.816133	0.424744
slr1818	2598	986	1713	525.5	1	slr1818				hypothetical protein	2598	986	1612	1662	0.0631255			1713	525.5	1187.5	0.0575131		0.911092			slr1818		hypothetical protein	0.053141	0.972045	0.0862017	0.053141	0.972045
slr2078	1254	965	814	554	1	slr2078		hypothetical protein		hypothetical protein	1254	965	289	339	0.0128758			814	554	260	0.0125923		0.977987			slr2078		hypothetical protein	0.0130031	1.03553	0.0813815	0.0130031	1.03553
slr0541	1507	1002	960	545	1	slr0541		hypothetical protein		hypothetical protein	1507	1002	505	555	0.0210798			960	545	415	0.0200993		0.953486			slr0541		hypothetical protein	0.0215076	1.01219	0.0830227	0.0215076	1.01219
slr1570	2008	972	938	521.5	1	slr1570				hypothetical protein	2008	972	1036	1086	0.0412481			938	521.5	416.5	0.020172		0.48904			slr1570		hypothetical protein	0.0378094	0.58662	0.137999	0.0378094	0.58662
sll0823	3852	941.5	3368	520.5	1	sll0823	sdhB	succinate dehydrogenase iron-sulfur protein	sdhB	succinate dehydrogenase iron-sulfur protein	3852	941.5	2910.5	2960.5	0.112445			3368	520.5	2847.5	0.13791		1.22647			sll0823	sdhB	succinate dehydrogenase iron-sulfur protein	0.105345	1.29296	0.0940315	0.105345	1.29296
slr0298	2250	911.5	1470	577.5	1	slr0298	fraH	heterocyst to vegetative cell connection protein	fraH	heterocyst to vegetative cell connection protein	2250	911.5	1338.5	1388.5	0.0527375			1470	577.5	892.5	0.0432257		0.819637			slr0298	fraH	heterocyst to vegetative cell connection protein	0.047947	0.795623	0.0339611	0.047947	0.795623
sll0195	2194	950	1682	545.5	1	sll0195				putative ATP-dependent protease	2194	950	1244	1294	0.0491483			1682	545.5	1136.5	0.0550431		1.11994			sll0195		putative ATP-dependent protease	0.0453317	1.08197	0.0537026	0.0453317	1.08197
sll0382	2389	924.5	970	538	1	sll0382				hypothetical protein	2389	924.5	1464.5	1514.5	0.0575232			970	538	432	0.0209227		0.363726			sll0382		hypothetical protein	0.0533135	0.382681	0.0268064	0.0533135	0.382681
slr1928	1979	896.5	1879	550	1	slr1928			pilA5	type 4 pilin-like protein	1979	896.5	1082.5	1132.5	0.0430142			1879	550	1329	0.0643663		1.49639			slr1928	pilA5	type 4 pilin-like protein	0.0392717	1.52852	0.0454254	0.0392717	1.52852
slr1710	1478	926.5	937	512	1	slr1710	mrcB or ponB	penicillin-binding protein 1B	mrcB, ponB	penicillin-binding protein 1B	1478	926.5	551.5	601.5	0.022846			937	512	425	0.0205836		0.900975			slr1710	mrcB, ponB	penicillin-binding protein 1B	0.0208459	0.976464	0.106758	0.0208459	0.976464
sll1891	3407	921.5	1910	545.5	1	sll1891				hypothetical protein	3407	921.5	2485.5	2535.5	0.0963025			1910	545.5	1364.5	0.0660856		0.686229			sll1891		hypothetical protein	0.0825219	0.731216	0.0636213	0.0825219	0.731216
slr0593	1433	888	975	524	1	slr0593		cAMP protein kinase regulatory chain	samp	Synechocystis cAMP binding membrane protein	1433	888	545	595	0.0225991			975	524	451	0.0218429		0.966538			slr0593	samp	Synechocystis cAMP binding membrane protein	0.0206356	0.908381	0.0822459	0.0206356	0.908381
slr2120	1402	893	986	515.5	1	slr2120				hypothetical protein	1402	893	509	559	0.0212317			986	515.5	470.5	0.0227873		1.07327			slr2120		hypothetical protein	0.0195561	1.05781	0.0218644	0.0195561	1.05781
slr0747	1552	907	1040	552	1	slr0747	msiK	ATP binding protein responsible for multiple sugar import	ggtA, msiK	ABC-type glucosylglycerol transport system ATP-binding protein	1552	907	645	695	0.0263973			1040	552	488	0.0236349		0.895353			slr0747	ggtA, msiK	ABC-type glucosylglycerol transport system ATP-binding protein	0.0222933	0.862074	0.0470638	0.0222933	0.862074
slr2082	2107	933	1252	557	1	slr2082	ctaD	cytochrome c oxidase subunit I	ctaD	cytochrome c oxidase subunit I	2107	933	1174	1224	0.0464896			1252	557	695	0.0336603		0.72404			slr2082	ctaD	cytochrome c oxidase subunit I	0.0352552	0.729011	0.00702987	0.0352552	0.729011
slr1566	1515	972.5	998	585	1	slr1566				hypothetical protein	1515	972.5	542.5	592.5	0.0225041			998	585	413	0.0200025		0.888835			slr1566		hypothetical protein	0.020453	0.94872	0.0846903	0.020453	0.94872
slr1720	2227	914.5	1627	597	1	slr1720	aspS	aspartyl-tRNA synthetase	aspS	aspartyl-tRNA synthetase	2227	914.5	1312.5	1362.5	0.05175			1627	597	1030	0.0498851		0.963962			slr1720	aspS	aspartyl-tRNA synthetase	0.0374123	1.0005	0.0516761	0.0374123	1.0005
sll0524	1636	1013.5	770	409	1	sll0524		hypothetical protein		hypothetical protein	1636	1013.5	622.5	672.5	0.0255427			770	409	361	0.017484		0.684501			sll0524		hypothetical protein	0.0243183	0.854191	0.239978	0.0243183	0.854191
sll0842	1553	1001	831	415.5	1	sll0842	nplT	neopullulanase	nplT	neopullulanase	1553	1001	552	602	0.022865			831	415.5	415.5	0.0201235		0.880104			sll0842	nplT	neopullulanase	0.0239932	0.993908	0.160943	0.0239932	0.993908
sll0036	1757	1010	900	428.5	1	sll0036		hypothetical protein		hypothetical protein	1757	1010	747	797	0.0302714			900	428.5	471.5	0.0228357		0.754367			sll0036		hypothetical protein	0.0295694	0.912821	0.224087	0.0295694	0.912821
slr1884	2350	1041.5	1352	472.5	1	slr1884	trpS	tryptophanyl-tRNA synthetase	trpS	tryptophanyl-tRNA synthetase	2350	1041.5	1308.5	1358.5	0.0515981			1352	472.5	879.5	0.042596		0.825535			slr1884	trpS	tryptophanyl-tRNA synthetase	0.04674	0.968713	0.202484	0.04674	0.968713
slr0311	1362	1038	678	472.5	1	slr0311		sensory transduction histidine kinase	hik29	two-component sensor histidine kinase	1362	1038	324	374	0.0142051			678	472.5	205.5	0.0099528		0.700648			slr0311	hik29	two-component sensor histidine kinase	0.0149035	0.793737	0.131648	0.0149035	0.793737
slr0878	1446	1013.5	800	471	1	slr0878		hypothetical protein		hypothetical protein	1446	1013.5	432.5	482.5	0.0183262			800	471	329	0.0159342		0.869477			slr0878		hypothetical protein	0.0169447	1.0816	0.299995	0.0169447	1.0816
sll0828	1856	969.5	1016	506	1	sll0828	nylA	6-aminohexanoate-cyclic-dimer hydrolase	nylA	6-aminohexanoate-cyclic-dimer hydrolase	1856	969.5	886.5	936.5	0.0355698			1016	506	510	0.0247004		0.694419			sll0828	nylA	6-aminohexanoate-cyclic-dimer hydrolase	0.0344392	0.795154	0.14246	0.0344392	0.795154
slr1239	2698	966.5	1672	533.5	1	slr1239	pntA	pyridine nucleotide transhydrogenase alpha subunit	pntA	NAD(P) transhydrogenase subunit alpha	2698	966.5	1731.5	1781.5	0.0676643			1672	533.5	1138.5	0.05514		0.814904			slr1239	pntA	NAD(P) transhydrogenase subunit alpha	0.0633175	0.887215	0.102263	0.0633175	0.887215
sll1579	12983	946	6274	544	1	sll1579	cpcC	phycocyanin associated linker protein	cpcC2	phycobilisome rod linker polypeptide	12983	946	12037	12087	0.459084			6274	544	5730	0.277516		0.604499			sll1579	cpcC2	phycobilisome rod linker polypeptide	0.463012	0.64014	0.0504044	0.463012	0.64014
slr1334	1368	920.5	840	523	1	slr1334				phosphomannomutase	1368	920.5	447.5	497.5	0.0188959			840	523	317	0.015353		0.812504			slr1334		phosphomannomutase	0.0171524	0.979191	0.235731	0.0171524	0.979191
sll1546	1798	987	1031	525.5	1	sll1546	ppx	exopolyphosphatase	ppx	exopolyphosphatase	1798	987	811	861	0.0327022			1031	525.5	505.5	0.0244824		0.748648			sll1546	ppx	exopolyphosphatase	0.0376107	0.722198	0.0374051	0.0376107	0.722198
sll1425	2208	1006	1203	543.5	1	sll1425	proS or drpA	proline-tRNA ligase	proS, drpA	proline-tRNA ligase	2208	1006	1202	1252	0.047553			1203	543.5	659.5	0.031941		0.671692			sll1425	proS, drpA	proline-tRNA ligase	0.0520647	0.730515	0.0831894	0.0520647	0.730515
sll1479	1723	982	904	501	1	sll1479	devB	glucose-6-P-dehydrogenase		6-phosphogluconolactonase	1723	982	741	791	0.0300435			904	501	403	0.0195181		0.649663			sll1479		6-phosphogluconolactonase	0.02933	0.671224	0.0304917	0.02933	0.671224
sll0252	2794	996	1626	536	1	sll0252				hypothetical protein	2794	996	1798	1848	0.0701901			1626	536	1090	0.052791		0.752114			sll0252		hypothetical protein	0.0605448	0.849739	0.138062	0.0605448	0.849739
sll0631	1400	958	932	593	1	sll0631	nadB	L-aspartate oxidase	nadB	L-aspartate oxidase	1400	958	442	492	0.018687			932	593	339	0.0164185		0.878606			sll0631	nadB	L-aspartate oxidase	0.0170286	0.980932	0.144711	0.0170286	0.980932
slr2058	2197	980.5	1281	551.5	1	slr2058	topA	DNA topoisomerase I	topA	DNA topoisomerase I	2197	980.5	1216.5	1266.5	0.0481038			1281	551.5	729.5	0.0353312		0.734479			slr2058	topA	DNA topoisomerase I	0.0471845	0.791564	0.0807295	0.0471845	0.791564
slr0544	1401	974.5	873	511	1	slr0544		ABC transporter		ABC transporter, ATP-binding protein	1401	974.5	426.5	476.5	0.0180983			873	511	362	0.0175324		0.968735			slr0544		ABC transporter, ATP-binding protein	0.0225367	1.0016	0.0464757	0.0225367	1.0016
slr1740	1399	947.5	1277	539.5	1	slr1740		extracellular solute-binding protein family	appA	ABC-type oligopeptide transport system substrate-binding protein	1399	947.5	451.5	501.5	0.0190478			1277	539.5	737.5	0.0357187		1.87521			slr1740	appA	ABC-type oligopeptide transport system substrate-binding protein	0.0183097	1.83007	0.0638427	0.0183097	1.83007
sll0777	1335	935.5	843	533.5	1	sll0777				hypothetical protein	1335	935.5	399.5	449.5	0.0170728			843	533.5	309.5	0.0149897		0.877992			sll0777		hypothetical protein	0.0167525	0.931481	0.0756454	0.0167525	0.931481
sll1771	2579	919	1722	539	1	sll1771		hypothetical protein	pphA	PII phosphatase	2579	919	1660	1710	0.0649486			1722	539	1183	0.0572952		0.882161			sll1771	pphA	PII phosphatase	0.0586192	0.88094	0.0017267	0.0586192	0.88094
slr0093	1419	921.5	1835	548	1	slr0093	dnaJ	DnaJ protein	dnaJ	DnaJ protein, heat shock protein 40, molecular chaperone	1419	921.5	497.5	547.5	0.020795			1835	548	1287	0.0623321		2.99746			slr0093	dnaJ	DnaJ protein, heat shock protein 40, molecular chaperone	0.0186715	3.11794	0.170374	0.0186715	3.11794
sll1356	1653	902.5	935	563.5	1	sll1356	glgP or glgY	glycogen phosphorylase	glgP, glgY	glycogen phosphorylase	1653	902.5	750.5	800.5	0.0304043			935	563.5	371.5	0.0179925		0.591775			sll1356	glgP, glgY	glycogen phosphorylase	0.0270002	0.66511	0.103711	0.0270002	0.66511
sll0549	2216	938.5	1770	539	1	sll0549				hypothetical protein	2216	938.5	1277.5	1327.5	0.0504207			1770	539	1231	0.0596199		1.18245			sll0549		hypothetical protein	0.0460258	1.2085	0.0368379	0.0460258	1.2085
sll1119	1513	915	941	548	1	sll1119				hypothetical protein	1513	915	598	648	0.0246121			941	548	393	0.0190338		0.773352			sll1119		hypothetical protein	0.0234476	0.759119	0.0201276	0.0234476	0.759119
sll1525	8641	911	5682	538	1	sll1525	prk or ptk	phosphoribulokinase	prk, ptk	phosphoribulokinase	8641	911	7730	7780	0.295497			5682	538	5144	0.249135		0.843103			sll1525	prk, ptk	phosphoribulokinase	0.256528	0.86282	0.027884	0.256528	0.86282
sll0455	1761	914.5	1185	572	1	sll0455	thrA or hom	homoserine dehydrogenase	thrA, hom	homoserine dehydrogenase	1761	914.5	846.5	896.5	0.0340506			1185	572	613	0.0296889		0.871906			sll0455	thrA, hom	homoserine dehydrogenase	0.0285723	0.896476	0.0347471	0.0285723	0.896476
slr1842	2561	943	1580	603	1	slr1842	cysK	cysteine synthase	cysK	cysteine synthase	2561	943	1618	1668	0.0633534			1580	603	977	0.0473182		0.746892			slr1842	cysK	cysteine synthase	0.050735	0.781817	0.0493918	0.050735	0.781817
sll0202	1674	949	1108	580.5	1	sll0202	gidA	glucose inhibited division protein A	gidA	glucose inhibited division protein A	1674	949	725	775	0.0294358			1108	580.5	527.5	0.0255479		0.867921			sll0202	gidA	glucose inhibited division protein A	0.0244402	0.934452	0.0940896	0.0244402	0.934452
slr0594	1665	972.5	1232	595.5	1	slr0594				hypothetical protein	1665	972.5	692.5	742.5	0.0282014			1232	595.5	636.5	0.030827		1.0931			slr0594		hypothetical protein	0.0235333	1.03094	0.0879122	0.0235333	1.03094
slr0344	1051	965	661	628	1	slr0344	rfbW	mannosyl transferase	rfbW	mannosyl transferase	1051	965	86	136	0.00516551			661	628	33	0.00159826		0.30941			slr0344	rfbW	mannosyl transferase	0.00634808	0.442644	0.188421	0.00634808	0.442644
sll0448	1310.5	1004.5	572	405.5	1	sll0448				hypothetical protein	1310.5	1004.5	306	356	0.0135215			572	405.5	166.5	0.00806395		0.596381			sll0448		hypothetical protein	0.0129301	0.780422	0.260273	0.0129301	0.780422
sll0169	4039	1015.5	3222	428.5	1	sll0169				hypothetical protein	4039	1015.5	3023.5	3073.5	0.116737			3222	428.5	2793.5	0.135295		1.15898			sll0169		hypothetical protein	0.115302	1.34767	0.266846	0.115302	1.34767
slr1579	2603	999	1131	433	1	slr1579				hypothetical protein	2603	999	1604	1654	0.0628217			1131	433	698	0.0338056		0.53812			slr1579		hypothetical protein	0.0585887	0.610992	0.103056	0.0585887	0.610992
slr0406	1491	1015.5	710	447.5	1	slr0406	pyrC	dihydroorotase	pyrC	dihydroorotase	1491	1015.5	475.5	525.5	0.0199594			710	447.5	262.5	0.0127134		0.636966			slr0406	pyrC	dihydroorotase	0.0174814	0.818299	0.256444	0.0174814	0.818299
sll1329	1871	987	1090	472	1	sll1329		monophosphatase		monophosphatase	1871	987	884	934	0.0354749			1090	472	618	0.029931		0.843725			sll1329		monophosphatase	0.0323546	0.956517	0.159512	0.0323546	0.956517
sll0273	1302	944	756	502	1	sll0273		Na+/H+ exchanger	nhaS2	Na+/H+ exchanger	1302	944	358	408	0.0154965			756	502	254	0.0123018		0.79384			sll0273	nhaS2	Na+/H+ exchanger	0.0144389	0.937064	0.20255	0.0144389	0.937064
sll0495	1592	969	1069	522	1	sll0495	asnS	asparaginyl-tRNA synthetase	asnS	asparaginyl-tRNA synthetase	1592	969	623	673	0.0255617			1069	522	547	0.0264924		1.03641			sll0495	asnS	asparaginyl-tRNA synthetase	0.0236327	1.10219	0.0930243	0.0236327	1.10219
slr0952	1685	983.5	1088	493	1	slr0952	fbp or fdp	fructose 1,6-bisphosphatase	fbpII, fbp, fdp	fructose-1,6-bisphosphatase	1685	983.5	701.5	751.5	0.0285432			1088	493	595	0.0288171		1.0096			slr0952	fbpII, fbp, fdp	fructose-1,6-bisphosphatase	0.0285702	1.12629	0.165028	0.0285702	1.12629
slr0527	1344	1005	758	494	1	slr0527	exsB	ExsB protein	exsB	ExsB	1344	1005	339	389	0.0147749			758	494	264	0.0127861		0.865394			slr0527	exsB	ExsB	0.0145319	0.894274	0.040843	0.0145319	0.894274
slr1679	1597	951.5	999	575	1	slr1679				d-alanyl-d-alanine dipeptidase	1597	951.5	645.5	695.5	0.0264162			999	575	424	0.0205352		0.777371			slr1679		d-alanyl-d-alanine dipeptidase	0.0266571	0.844541	0.0949937	0.0266571	0.844541
sll1687	1277	981	731	542	1	sll1687		sensory transduction histidine kinase	hik17	hypothetical protein	1277	981	296	346	0.0131417			731	542	189	0.00915367		0.696538			sll1687	hik17	hypothetical protein	0.0125181	0.84091	0.204172	0.0125181	0.84091
sll0071	1240	1009.5	647	542	1	sll0071				hypothetical protein	1240	1009.5	230.5	280.5	0.0106539			647	542	105	0.00508537		0.477327			sll0071		hypothetical protein	0.0160629	0.667852	0.269444	0.0160629	0.667852
sll1659	1501	992.5	888	516.5	1	sll1659				hypothetical protein	1501	992.5	508.5	558.5	0.0212128			888	516.5	371.5	0.0179925		0.848194			sll1659		hypothetical protein	0.0228775	0.861652	0.0190331	0.0228775	0.861652
sll0019	1791	985	1084	561	1	sll0019		hypothetical protein	dxr	1-deoxy-D-xylulose 5-phosphate reductoisomerase	1791	985	806	856	0.0325123			1084	561	523	0.02533		0.779089			sll0019	dxr	1-deoxy-D-xylulose 5-phosphate reductoisomerase	0.0295024	0.835814	0.0802199	0.0295024	0.835814
slr1176	9485	960.5	4566	544	1	slr1176	agp	ADP-glucose pyrophosphorylase	glgC, agp	glucose-1-phosphate adenylyltransferase	9485	960.5	8524.5	8574.5	0.325674			4566	544	4022	0.194794		0.598126			slr1176	glgC, agp	glucose-1-phosphate adenylyltransferase	0.279562	0.644777	0.0659749	0.279562	0.644777
slr0370	1945	983	1121	540.5	1	slr0370	gabD	succinate-semialdehyde dehydrogenase (NADP+)	gabD	succinate-semialdehyde dehydrogenase (NADP+)	1945	983	962	1012	0.0384374			1121	540.5	580.5	0.0281148		0.731444			slr0370	gabD	succinate-semialdehyde dehydrogenase (NADP+)	0.0361434	0.764186	0.0463047	0.0361434	0.764186
sll0721	1146	964	606	523	1	sll0721		leukotoxin (LtA)		leukotoxin (LtA)	1146	964	182	232	0.00881175			606	523	83	0.00401986		0.456194			sll0721		leukotoxin (LtA)	0.00992835	0.625415	0.239314	0.00992835	0.625415
slr0993	20199	965.5	6949	540	1	slr0993	nlpD	lipoprotein NlpD	nlpD	lipoprotein NlpD	20199	965.5	19233.5	19283.5	0.732419			6949	540	6409	0.310401		0.423803			slr0993	nlpD	lipoprotein NlpD	0.691553	0.446599	0.0322391	0.691553	0.446599
slr0654	3423	926.5	1916	531.5	1	slr0654				hypothetical protein	3423	926.5	2496.5	2546.5	0.0967203			1916	531.5	1384.5	0.0670543		0.69328			slr0654		hypothetical protein	0.0861968	0.684521	0.0123864	0.0861968	0.684521
slr0288	1660	923.5	994	526	1	slr0288	glnN	glutamate--ammonia ligase	glnN	glutamate-ammonia ligase, glutamine synthetase type III	1660	923.5	736.5	786.5	0.0298726			994	526	468	0.0226662		0.758764			slr0288	glnN	glutamate-ammonia ligase, glutamine synthetase type III	0.0280087	0.786166	0.0387523	0.0280087	0.786166
slr1418	1334	936	836	560.5	1	slr1418	pyrD	dihydroorotate dehydrogenase	pyrD	dihydroorotate oxidase	1334	936	398	448	0.0170158			836	560.5	275.5	0.013343		0.784157			slr1418	pyrD	dihydroorotate oxidase	0.015971	0.849516	0.092431	0.015971	0.849516
sll1534	1919	915	1046	539.5	1	sll1534		hypothetical protein		probable glycosyltransferase	1919	915	1004	1054	0.0400327			1046	539.5	506.5	0.0245309		0.612771			sll1534		probable glycosyltransferase	0.0357052	0.590211	0.0319052	0.0357052	0.590211
sll0505	2458	939	1560	534	1	sll0505		hypothetical protein		hypothetical protein	2458	939	1519	1569	0.0595932			1560	534	1026	0.0496913		0.833842			sll0505		hypothetical protein	0.0540685	0.829039	0.00679254	0.0540685	0.829039
slr0942	2070	902.5	1067	520.5	1	slr0942		aldehyde reductase		aldehyde reductase	2070	902.5	1167.5	1217.5	0.0462427			1067	520.5	546.5	0.0264681		0.572375			slr0942		aldehyde reductase	0.0399494	0.553099	0.0272606	0.0399494	0.553099
sll0038	2318	898	1738	566.5	1	sll0038	cheY	chemotaxis protein CheY	pixG, pisG, taxP1, rer1, cheY, rre36	two-component response regulator (PatA subfamily), chemotaxis protein CheY	2318	898	1420	1470	0.055833			1738	566.5	1171.5	0.0567382		1.01621			sll0038	pixG, pisG, taxP1, rer1, cheY, rre36	two-component response regulator (PatA subfamily), chemotaxis protein CheY	0.0471486	1.01983	0.00511636	0.0471486	1.01983
slr1174	1374	928	929	577.5	1	slr1174				putative ABC-2 type transport system permease protein	1374	928	446	496	0.0188389			929	577.5	351.5	0.0170239		0.903656			slr1174		putative ABC-2 type transport system permease protein	0.0161681	0.928048	0.0344951	0.0161681	0.928048
slr1737	1335	973	1047	607.5	1	slr1737				hypothetical protein	1335	973	362	412	0.0156484			1047	607.5	439.5	0.0212859		1.36026			slr1737		hypothetical protein	0.0140322	1.07828	0.398783	0.0140322	1.07828
slr1119	1753	1026.5	1304	629	1	slr1119				hypothetical protein	1753	1026.5	726.5	776.5	0.0294928			1304	629	675	0.0326917		1.10846			slr1119		hypothetical protein	0.0240342	1.10176	0.00948116	0.0240342	1.10176
sll1755	1317	954	1026	607	1	sll1755				hypothetical protein	1317	954	363	413	0.0156864			1026	607	419	0.0202931		1.29367			sll1755		hypothetical protein	0.0144084	1.18354	0.155741	0.0144084	1.18354
slr1319	2161	926	965	587.5	1	slr1319	fecB	iron(III) dicitrate transport system permease protein FecB	fecB	ABC-type iron(III) dicitrate transport system substrate-binding protein	2161	926	1235	1285	0.0488064			965	587.5	377.5	0.0182831		0.374605			slr1319	fecB	ABC-type iron(III) dicitrate transport system substrate-binding protein	0.0378908	0.426061	0.0727703	0.0378908	0.426061
sll1268	1704	995.5	835	405	1	sll1268				hypothetical protein	1704	995.5	708.5	758.5	0.0288091			835	405	430	0.0208258		0.72289			sll1268		hypothetical protein	0.0292824	0.90842	0.262379	0.0292824	0.90842
slr0930	1682	1036	856	425	1	slr0930				hypothetical protein	1682	1036	646	696	0.0264352			856	425	431	0.0208742		0.789637			slr0930		hypothetical protein	0.0261742	0.905355	0.16365	0.0261742	0.905355
sll1353	1341	972.5	704	458.5	1	sll1353		sensory transduction histidine kinase	hik15	two-component sensor histidine kinase	1341	972.5	368.5	418.5	0.0158953			704	458.5	245.5	0.0118901		0.748024			sll1353	hik15	two-component sensor histidine kinase	0.0146094	0.766351	0.0259179	0.0146094	0.766351
sll1689	1796	1016	963	453.5	1	sll1689	rpoD	RNA polymerase sigma factor	sigE, rpoD2-V, rpoD	RNA polymerase sigma factor, group 2, nitrogen-regulated	1796	1016	780	830	0.0315248			963	453.5	509.5	0.0246762		0.782754			sll1689	sigE, rpoD2-V, rpoD	RNA polymerase sigma factor, group 2, nitrogen-regulated	0.0294624	0.920844	0.195289	0.0294624	0.920844
slr1751	3383	952.5	2976	506	1	slr1751	prc or tsp	carboxyl-terminal protease	prc, tsp	periplasmic carboxyl-terminal protease	3383	952.5	2430.5	2480.5	0.0942135			2976	506	2470	0.119627		1.26975			slr1751	prc, tsp	periplasmic carboxyl-terminal protease	0.0899928	1.3489	0.111936	0.0899928	1.3489
slr1888	1256.5	990.5	746	519	1	slr1888		hypothetical protein		hypothetical protein	1256.5	990.5	266	316	0.0120022			746	519	227	0.0109941		0.916006			slr1888		hypothetical protein	0.0112919	0.992258	0.107837	0.0112919	0.992258
sll1469	1300.5	1008	679	511	1	sll1469				hypothetical protein	1300.5	1008	292.5	342.5	0.0130087			679	511	168	0.00813659		0.625472			sll1469		hypothetical protein	0.0129923	0.753382	0.180892	0.0129923	0.753382
sll1971	1355	1025.5	692	470	1	sll1971				hypothetical protein	1355	1025.5	329.5	379.5	0.014414			692	470	222	0.0107519		0.745934			sll1971		hypothetical protein	0.0145832	0.857666	0.158012	0.0145832	0.857666
slr1901	1468	1050	756	483.5	1	slr1901		ABC transporter		putative ABC-2 type transport system ATP-binding protein	1468	1050	418	468	0.0177754			756	483.5	272.5	0.0131977		0.742472			slr1901		putative ABC-2 type transport system ATP-binding protein	0.0179824	0.887104	0.204541	0.0179824	0.887104
sll0572	1238	984	764	530	1	sll0572				hypothetical protein	1238	984	254	304	0.0115464			764	530	234	0.0113331		0.981526			sll0572		hypothetical protein	0.0122322	0.957364	0.0341696	0.0122322	0.957364
slr1702	1554	1007	1002	510	1	slr1702				hypothetical protein	1554	1007	547	597	0.0226751			1002	510	492	0.0238286		1.05087			slr1702		hypothetical protein	0.0231645	1.11038	0.0841556	0.0231645	1.11038
sll0446	1279	1108.5	707	544.5	1	sll0446				hypothetical protein	1279	1108.5	170.5	220.5	0.00837496			707	544.5	162.5	0.00787022		0.939732			sll0446		hypothetical protein	0.0119498	0.779139	0.227113	0.0119498	0.779139
slr1808	10124	1127	3089	569	1	slr1808	hemA	transfer RNA-Gln reductase	hemA	glutamyl-tRNA reductase	10124	1127	8997	9047	0.34362			3089	569	2520	0.122049		0.355186			slr1808	hemA	glutamyl-tRNA reductase	0.20228	0.754102	0.564153	0.20228	0.754102
slr1494	1359.5	973	828.5	519	1	slr1494		ABC transporter		MDR (multidrug resistance) family ABC transporter	1359.5	973	386.5	436.5	0.016579			828.5	519	309.5	0.0149897		0.90414			slr1494		MDR (multidrug resistance) family ABC transporter	0.0166215	0.908275	0.00584702	0.0166215	0.908275
sll0862	1581	926.5	1032	538	1	sll0862				hypothetical protein	1581	926.5	654.5	704.5	0.0267581			1032	538	494	0.0239255		0.89414			sll0862		hypothetical protein	0.025486	0.948125	0.0763467	0.025486	0.948125
sll1549	5431	948	863	531	1	sll1549				salt-enhanced periplasmic protein	5431	948	4483	4533	0.172171			863	531	332	0.0160795		0.0933924			sll1549		salt-enhanced periplasmic protein	0.118332	0.190789	0.137739	0.118332	0.190789
sll1276	1459	961.5	894	523.5	1	sll1276		ABC transporter		MDR (multidrug resistance) family ABC transporter	1459	961.5	497.5	547.5	0.020795			894	523.5	370.5	0.0179441		0.862906			sll1276		MDR (multidrug resistance) family ABC transporter	0.0205349	0.931183	0.0965584	0.0205349	0.931183
sll1876	1232	978.5	703	545	1	sll1876	hemN	oxygen independent coprophorphyrinogen III oxidase	hemN1	coprophorphyrinogen III oxidase, anaerobic (oxygen-independent)	1232	978.5	253.5	303.5	0.0115274			703	545	158	0.00765227		0.663831			sll1876	hemN1	coprophorphyrinogen III oxidase, anaerobic (oxygen-independent)	0.0119041	0.798555	0.190527	0.0119041	0.798555
sll1129	1632	965	956	527.5	1	sll1129	todF	2-hydroxy-6-oxohepta-2,4-dienoate hydrolase	todF	2-hydroxy-6-oxohepta-2,4-dienoate hydrolase	1632	965	667	717	0.0272329			956	527.5	428.5	0.0207532		0.762063			sll1129	todF	2-hydroxy-6-oxohepta-2,4-dienoate hydrolase	0.0255689	0.849688	0.12392	0.0255689	0.849688
sll2005	2597	956.5	1826	553	1	sll2005	gyrB	DNA gyrase B subunit	gyrB	DNA gyrase subunit B [Contains: Ssp gyrB intein]	2597	956.5	1640.5	1690.5	0.064208			1826	553	1273	0.0616541		0.960224			sll2005	gyrB	DNA gyrase subunit B [Contains: Ssp gyrB intein]	0.0581523	1.02318	0.0890323	0.0581523	1.02318
sll1468	3074	918.5	2232	573.5	1	sll1468			crtR, bhy	beta-carotene hydroxylase	3074	918.5	2155.5	2205.5	0.0837686			2232	573.5	1658.5	0.0803247		0.958888			sll1468	crtR, bhy	beta-carotene hydroxylase	0.073011	0.957752	0.00160632	0.073011	0.957752
sll1717	1268	897.5	926	555	1	sll1717				hypothetical protein	1268	897.5	370.5	420.5	0.0159713			926	555	371	0.0179683		1.12504			sll1717		hypothetical protein	0.0147246	1.07007	0.0777435	0.0147246	1.07007
sll1733	1703	915.5	1105	535.5	1	sll1733	ndhD	NADH dehydrogenase subunit 4	ndhD3	NADH dehydrogenase I chain M, involved in inducible high-affinity CO2 uptake	1703	915.5	787.5	837.5	0.0318096			1105	535.5	569.5	0.0275821		0.867098			sll1733	ndhD3	NADH dehydrogenase I chain M, involved in inducible high-affinity CO2 uptake	0.0284559	0.886538	0.0274922	0.0284559	0.886538
slr0606	2088	928.5	1334	527	1	slr0606				hypothetical protein	2088	928.5	1159.5	1209.5	0.0459388			1334	527	807	0.0390847		0.850799			slr0606		hypothetical protein	0.0408306	0.892938	0.0595939	0.0408306	0.892938
slr2019	1455	931	1030	556.5	1	slr2019		ABC transporter		MDR (multidrug resistance) family ABC transporter	1455	931	524	574	0.0218015			1030	556.5	473.5	0.0229326		1.05188			slr2019		MDR (multidrug resistance) family ABC transporter	0.0190589	1.06385	0.016922	0.0190589	1.06385
sll1108	1714	925.5	1164	586.5	1	sll1108		hypothetical protein	surE	survival protein SurE homolog	1714	925.5	788.5	838.5	0.0318476			1164	586.5	577.5	0.0279695		0.87823			sll1108	surE	survival protein SurE homolog	0.0266791	0.926336	0.0680321	0.0266791	0.926336
sll1297	1363	979.5	943	592.5	1	sll1297	pobA	phenoxybenzoate dioxygenase	pobA	probable dioxygenase, Rieske iron-sulfur component	1363	979.5	383.5	433.5	0.0164651			943	592.5	350.5	0.0169755		1.031			sll1297	pobA	probable dioxygenase, Rieske iron-sulfur component	0.0149715	0.962715	0.0965686	0.0149715	0.962715
slr0758	1607	920	1044	596	1	slr0758			kaiC1	circadian clock protein KaiC homolog	1607	920	687	737	0.0279925			1044	596	448	0.0216976		0.775122			slr0758	kaiC1	circadian clock protein KaiC homolog	0.0226082	0.797461	0.0315919	0.0226082	0.797461
sll1161	1199	909.5	814	577	1	sll1161			cya3	putative adenylate cyclase	1199	909.5	289.5	339.5	0.0128948			814	577	237	0.0114784		0.89016			sll1161	cya3	putative adenylate cyclase	0.0115161	0.807941	0.116275	0.0115161	0.807941
slr1871	1278	1001	561	437.5	1	slr1871		transcriptional regulator		transcriptional regulator, LysR family protein	1278	1001	277	327	0.01242			561	437.5	123.5	0.00598137		0.481591			slr1871		transcriptional regulator, LysR family protein	0.0113849	0.742117	0.368439	0.0113849	0.742117
sll0384	2318	1025.5	693	441.5	1	sll0384			cbiQ	ABC-type cobalt transport system permease protein	2318	1025.5	1292.5	1342.5	0.0509904			693	441.5	251.5	0.0121807		0.238882			sll0384	cbiQ	ABC-type cobalt transport system permease protein	0.0485216	0.283115	0.062555	0.0485216	0.283115
slr1403	1305	1006	637	426	1	slr1403				integrin alpha/beta4 subunit domain homolog	1305	1006	299	349	0.0132556			637	426	211	0.0102192		0.770933			slr1403		integrin alpha/beta4 subunit domain homolog	0.0128358	0.914596	0.20317	0.0128358	0.914596
sll0058	1759	998	858	480.5	1	sll0058	dnaK	DnaK protein	dnaK1, dnaK	DnaK protein 1, heat shock protein 70, molecular chaperone	1759	998	761	811	0.0308031			858	480.5	377.5	0.0182831		0.593548			sll0058	dnaK1, dnaK	DnaK protein 1, heat shock protein 70, molecular chaperone	0.0294105	0.720127	0.179011	0.0294105	0.720127
slr1443	1360	993	762	504	1	slr1443	pknA	protein kinase	pknA	protein kinase	1360	993	367	417	0.0158384			762	504	258	0.0124955		0.788938			slr1443	pknA	protein kinase	0.0155657	0.852748	0.0902405	0.0155657	0.852748
sll0191	1388	999	742	473	1	sll0191				hypothetical protein	1388	999	389	439	0.0166739			742	473	269	0.0130282		0.781353			sll0191		hypothetical protein	0.0150759	0.760323	0.0297402	0.0150759	0.760323
sll1453	4031	1035	1399	481.5	1	sll1453	nrtD	nitrate transport protein NrtD	nrtD	ABC-type nitrate/nitrite transport system ATP-binding protein	4031	1035	2996	3046	0.115692			1399	481.5	917.5	0.0444365		0.384092			sll1453	nrtD	ABC-type nitrate/nitrite transport system ATP-binding protein	0.115291	0.464585	0.113834	0.115291	0.464585
sll0024	1228	1094	581	478	1	sll0024				hypothetical protein	1228	1094	134	184	0.00698863			581	478	103	0.00498851		0.713804			sll0024		hypothetical protein	0.00759755	0.572372	0.200015	0.00759755	0.572372
sll1071	2479	1077	1310	513	1	sll1071				hypothetical protein	2479	1077	1402	1452	0.0551494			1310	513	797	0.0386004		0.699924			sll1071		hypothetical protein	0.0531016	0.790104	0.127533	0.0531016	0.790104
slr0387	1241.5	955	737	510	1	slr0387	nifS	NifS protein	nifS1	NifS protein, facilitates iron-sulfur cluster assembly	1241.5	955	286.5	336.5	0.0127808			737	510	227	0.0109941		0.860201			slr0387	nifS1	NifS protein, facilitates iron-sulfur cluster assembly	0.0118163	1.01646	0.220987	0.0118163	1.01646
sll1858	1715	986	960	538.5	1	sll1858				hypothetical protein	1715	986	729	779	0.0295877			960	538.5	421.5	0.0204141		0.689953			sll1858		hypothetical protein	0.0294786	0.782685	0.131143	0.0294786	0.782685
slr0574	1655	942.5	901	534	1	slr0574	cyp	cytochrome P450	cyp	cytochrome P450	1655	942.5	712.5	762.5	0.028961			901	534	367	0.0177746		0.613742			slr0574	cyp	cytochrome P450	0.0201381	0.694696	0.114487	0.0201381	0.694696
sll0855	1401	986	855	526.5	1	sll0855		hypothetical protein		hypothetical protein	1401	986	415	465	0.0176615			855	526.5	328.5	0.0159099		0.900828			sll0855		hypothetical protein	0.0296076	0.927198	0.0372923	0.0296076	0.927198
sll0373	1712	912	1204	538	1	sll0373	proA	gamma-glutamyl phosphate reductase	proA	glutamate-5-semialdehyde dehydrogenase	1712	912	800	850	0.0322844			1204	538	666	0.0322558		0.999113			sll0373	proA	glutamate-5-semialdehyde dehydrogenase	0.029485	1.06061	0.0869713	0.029485	1.06061
slr1865	1351.5	975	859	534	1	slr1865				putative multiple sugar transport system substrate-binding protein	1351.5	975	376.5	426.5	0.0161992			859	534	325	0.0157404		0.971681			slr1865		putative multiple sugar transport system substrate-binding protein	0.0169529	0.998278	0.0376142	0.0169529	0.998278
slr0480	1551	921.5	874	556	1	slr0480	ycf46	hypothetical protein	ycf46	hypothetical protein	1551	921.5	629.5	679.5	0.0258085			874	556	318	0.0154014		0.596756			slr0480	ycf46	hypothetical protein	0.0222983	0.73667	0.197867	0.0222983	0.73667
slr0886	2701	974	1787	592	1	slr0886	fabG	3-oxoacyl-[acyl-carrier protein] reductase	fabG1	3-oxoacyl-[acyl-carrier protein] reductase 1	2701	974	1727	1777	0.0674934			1787	592	1195	0.0578764		0.857511			slr0886	fabG1	3-oxoacyl-[acyl-carrier protein] reductase 1	0.0597564	0.861721	0.00595317	0.0597564	0.861721
slr0049	2920	891.5	1673	536.5	1	slr0049				hypothetical protein	2920	891.5	2028.5	2078.5	0.0789449			1673	536.5	1136.5	0.0550431		0.697234			slr0049		hypothetical protein	0.0685137	0.734386	0.0525402	0.0685137	0.734386
slr1229	1242	903	806	513	1	slr1229		hypothetical protein		sulfate permease	1242	903	339	389	0.0147749			806	513	293	0.0141906		0.960456			slr1229		sulfate permease	0.0151401	1.01131	0.0719163	0.0151401	1.01131
slr0213	2149	925	1464	572.5	1	slr0213	guaA	GMP synthetase	guaA	GMP synthase (glutamine-hydrolysing)	2149	925	1224	1274	0.0483886			1464	572.5	891.5	0.0431772		0.892301			slr0213	guaA	GMP synthase (glutamine-hydrolysing)	0.0418431	0.878362	0.0197125	0.0418431	0.878362
slr1538	1285	960	802.5	539	1	slr1538	cbiD	CbiD protein	cbiD	CbiD protein	1285	960	325	375	0.0142431			802.5	539	263.5	0.0127619		0.896002			slr1538	cbiD	CbiD protein	0.0136288	0.866513	0.0417037	0.0136288	0.866513
sll0750	1686	931	1153	598.5	1	sll0750		sensory transduction histidine kinase	hik8, sasA	two-component sensor histidine kinase	1686	931	755	805	0.0305752			1153	598.5	554.5	0.0268556		0.878345			sll0750	hik8, sasA	two-component sensor histidine kinase	0.0263808	0.895263	0.023926	0.0263808	0.895263
slr1140	1404	921.5	995	610	1	slr1140		3-amino-5-hydroxybenzoic acid synthase		3-amino-5-hydroxybenzoic acid synthase	1404	921.5	482.5	532.5	0.0202252			995	610	385	0.0186464		0.921935			slr1140		3-amino-5-hydroxybenzoic acid synthase	0.0192266	0.962289	0.057069	0.0192266	0.962289
sll0294	1274	902	858	567.5	1	sll0294				hypothetical protein	1274	902	372	422	0.0160283			858	567.5	290.5	0.0140695		0.877795			sll0294		hypothetical protein	0.0136332	0.898299	0.0289967	0.0136332	0.898299
sll1925	1664	918	1043	538	1	sll1925				hypothetical protein	1664	918	746	796	0.0302334			1043	538	505	0.0244582		0.80898			sll1925		hypothetical protein	0.0253507	0.846536	0.0531121	0.0253507	0.846536
slr0156	1422	941	1085	563.5	1	slr0156	clpB	ClpB protein	clpB2	ClpB protein	1422	941	481	531	0.0201683			1085	563.5	521.5	0.0252573		1.25233			slr0156	clpB2	ClpB protein	0.0176631	1.13622	0.164213	0.0176631	1.13622
slr1033	1195.5	929	785.5	572.5	1	slr1033				hypothetical protein	1195.5	929	266.5	316.5	0.0120212			785.5	572.5	213	0.010316		0.858154			slr1033		hypothetical protein	0.0117648	0.835069	0.0326472	0.0117648	0.835069
sll1807	4380	901	5249	541	1	sll1807	rpl24	50S ribosomal protein L24	rplX, rpl24	50S ribosomal protein L24	4380	901	3479	3529	0.134037			5249	541	4708	0.228018		1.70116			sll1807	rplX, rpl24	50S ribosomal protein L24	0.117551	1.63599	0.0921613	0.127729	1.63809
sll1807	5353	899	6664	538.5	1	sll1807	rpl24	50S ribosomal protein L24	rplX, rpl24	50S ribosomal protein L24	5353	899	4454	4504	0.171069			6664	538.5	6125.5	0.296671		1.73421			sll1807	rplX, rpl24	50S ribosomal protein L24	0.148358	1.71037	0.0337159
sll1326	7577	909	4309	494	1	sll1326	atpA	ATP synthase a subunit	atpA	ATP synthase alpha chain	7577	909	6668	6718	0.255161			4309	494	3815	0.184768		0.724126			sll1326	atpA	ATP synthase alpha chain	0.264966	0.793136	0.0975953	0.249053	0.948852
sll1326	9938	895	6532	523.5	1	sll1326	atpA	ATP synthase a subunit	atpA	ATP synthase alpha chain	9938	895	9043	9093	0.345367			6532	523.5	6008.5	0.291004		0.842594			sll1326	atpA	ATP synthase alpha chain	0.321115	0.86538	0.0322244
ssl1923	1045	920.5	669	525	1	ssl1923				hypothetical protein	1045	920.5	124.5	174.5	0.0066278			669	525	144	0.00697422		1.05227			ssl1923		hypothetical protein	0.00784194	0.928047	0.175676	0.00784194	0.928047
slr1200	2214	873.5	1419	570	1	slr1200	livH	high-affinity branched-chain amino acid transport protein	urtB, livH	ABC-type urea transport system permease protein	2214	873.5	1340.5	1390.5	0.0528135			1419	570	849	0.0411189		0.778567			slr1200	urtB, livH	ABC-type urea transport system permease protein	0.0467974	0.762426	0.0228266	0.0467974	0.762426
ssl0787	1361	905	807	553	1	ssl0787				hypothetical protein	1361	905	456	506	0.0192187			807	553	254	0.0123018		0.640092			ssl0787		hypothetical protein	0.0168986	0.731727	0.129592	0.0168986	0.731727
slr1202	1347	879	1021	531	1	slr1202	lacF	lactose transport system permease protein LacF	lacF	putative ABC-type lactose transport system permease protein	1347	879	468	518	0.0196745			1021	531	490	0.0237317		1.20622			slr1202	lacF	putative ABC-type lactose transport system permease protein	0.0185265	1.16236	0.0620229	0.0185265	1.16236
slr1513	1180	913	821	544	1	slr1513				plasma membrane protein of unknown function	1180	913	267	317	0.0120402			821	544	277	0.0134157		1.11424			slr1513		plasma membrane protein of unknown function	0.012508	0.98981	0.175975	0.012508	0.98981
sll1060	1282	875	895	529	1	sll1060				hypothetical protein	1282	875	407	457	0.0173576			895	529	366	0.0177262		1.02123			sll1060		hypothetical protein	0.016306	0.952287	0.0975032	0.016306	0.952287
ssr3451	3197	839	2119	547.5	1	ssr3451	psbE	cytochrome b559 a subunit	psbE	cytochrome b559 alpha chain	3197	839	2358	2408	0.0914598			2119	547.5	1571.5	0.0761111		0.83218			ssr3451	psbE	cytochrome b559 alpha chain	0.0829197	0.846612	0.0204103	0.0829197	0.846612
sll0877	1418	872	1070	523	1	sll0877				hypothetical protein	1418	872	546	596	0.0226371			1070	523	547	0.0264924		1.17031			sll0877		hypothetical protein	0.0210504	1.11897	0.0726053	0.0210504	1.11897
sll0896	1043	854	710	536.5	1	sll0896			ruvC	crossover junction endodeoxyribonuclease	1043	854	189	239	0.00907762			710	536.5	173.5	0.00840297		0.92568			sll0896	ruvC	crossover junction endodeoxyribonuclease	0.00910547	0.963102	0.0529222	0.00910547	0.963102
sll1296	1310	856.5	835	512.5	1	sll1296	cheA	chemotaxis protein CheA	hik39, cheA	chemotaxis CheA-like protein, two-component hybrid histidine kinase	1310	856.5	453.5	503.5	0.0191238			835	512.5	322.5	0.0156194		0.816751			sll1296	hik39, cheA	chemotaxis CheA-like protein, two-component hybrid histidine kinase	0.0172856	0.807762	0.0127127	0.0172856	0.807762
sll0756	1200	869	884	530.5	1	sll0756				hypothetical protein	1200	869	331	381	0.014471			884	530.5	353.5	0.0171207		1.18311			sll0756		hypothetical protein	0.0125359	1.16014	0.0324741	0.0125359	1.16014
slr0009	16092	859.5	6290	503	1	slr0009	rbcL	ribulose bisphosphate carboxylase large subunit	rbcL	ribulose-bisphosphate carboxylase large chain	16092	859.5	15232.5	15282.5	0.580455			6290	503	5787	0.280277		0.482857			slr0009	rbcL	ribulose-bisphosphate carboxylase large chain	0.519526	0.515498	0.0461619	0.519526	0.515498
slr1215	1153	874	771	532.5	1	slr1215				hypothetical protein	1153	874	279	329	0.012496			771	532.5	238.5	0.0115511		0.924383			slr1215		hypothetical protein	0.0119056	0.816938	0.15195	0.0119056	0.816938
slr0528	1526	843.5	967	522	1	slr0528	murE	UDP-MurNac-tripeptide synthetase	murE	UDP-MurNac-tripeptide synthetase	1526	843.5	682.5	732.5	0.0278216			967	522	445	0.0215523		0.774661			slr0528	murE	UDP-MurNac-tripeptide synthetase	0.0229283	0.780229	0.00787455	0.0229283	0.780229
sll1812	4611	834	4391	520	1	sll1812	rps5	30S ribosomal protein S5	rpsE, rps5	30S ribosomal protein S5	4611	834	3777	3827	0.145356			4391	520	3871	0.187481		1.28981			sll1812	rpsE, rps5	30S ribosomal protein S5	0.115912	1.33617	0.0655692	0.115912	1.33617
slr0689	1552	832.5	1266	522.5	1	slr0689				hypothetical protein	1552	832.5	719.5	769.5	0.0292269			1266	522.5	743.5	0.0360093		1.23206			slr0689		hypothetical protein	0.0244998	1.07492	0.222226	0.0244998	1.07492
smr0008	1278	977	652	428.5	1	smr0008	psbJ	photosystem II PsbJ protein	psbJ	photosystem II PsbJ protein	1278	977	301	351	0.0133316			652	428.5	223.5	0.0108246		0.811951			smr0008	psbJ	photosystem II PsbJ protein	0.0136751	0.827656	0.0222109	0.0136751	0.827656
sll1685	1209	968	696.5	456.5	1	sll1685	ycf10	heme binding protein precursor	ycf10, cotA, pxcA	Involved in light-induced Na+-dependent proton extrusion	1209	968	241	291	0.0110527			696.5	456.5	240	0.0116237		1.05167			sll1685	ycf10, cotA, pxcA	Involved in light-induced Na+-dependent proton extrusion	0.0112322	0.983893	0.0958447	0.0112322	0.983893
ssr1604	2219	906	1538	472	1	ssr1604	rpl28	50S ribosomal protein L28	rpmB, rpl28	50S ribosomal protein L28	2219	906	1313	1363	0.051769			1538	472	1066	0.0516286		0.997288			ssr1604	rpmB, rpl28	50S ribosomal protein L28	0.0562195	1.17303	0.248536	0.0562195	1.17303
slr1510	1623	889.5	937	500	1	slr1510	plsX	PlsX protein	plsX	fatty acid/phospholipid synthesis protein	1623	889.5	733.5	783.5	0.0297586			937	500	437	0.0211648		0.711217			slr1510	plsX	fatty acid/phospholipid synthesis protein	0.0273532	0.82744	0.164365	0.0273532	0.82744
ssl2162	1211	899.5	877	519	1	ssl2162				hypothetical protein	1211	899.5	311.5	361.5	0.0137304			877	519	358	0.0173387		1.2628			ssl2162		hypothetical protein	0.0127835	1.25185	0.0154844	0.0127835	1.25185
slr1717	1268.5	878	848	502.5	1	slr1717				hypothetical protein	1268.5	878	390.5	440.5	0.0167309			848	502.5	345.5	0.0167333		1.00014			slr1717		hypothetical protein	0.0166106	0.971258	0.0408472	0.0166106	0.971258
slr0871	1122	888.5	697	518.5	1	slr0871				hypothetical protein	1122	888.5	233.5	283.5	0.0107678			697	518.5	178.5	0.00864513		0.802869			slr0871		hypothetical protein	0.00961265	0.889784	0.122917	0.00961265	0.889784
sll1069	4071	944.5	2993	536.5	1	sll1069	fabF or fabJ	beta ketoacyl-acyl carrier protein synthase	fabF, fabJ	3-oxoacyl-[acyl-carrier-protein] synthase	4071	944.5	3126.5	3176.5	0.120649			2993	536.5	2456.5	0.118973		0.986114			sll1069	fabF, fabJ	3-oxoacyl-[acyl-carrier-protein] synthase	0.111301	1.02704	0.0578785	0.111301	1.02704
sll0860	1483	910.5	856	501.5	1	sll0860				hypothetical protein	1483	910.5	572.5	622.5	0.0236436			856	501.5	354.5	0.0171692		0.726167			sll0860		hypothetical protein	0.0233591	0.797143	0.100375	0.0233591	0.797143
sll1033	1393	900.5	804	457.5	1	sll1033				hypothetical protein	1393	900.5	492.5	542.5	0.0206051			804	457.5	346.5	0.0167817		0.814447			sll1033		hypothetical protein	0.0201503	0.909856	0.134928	0.0201503	0.909856
slr0779	1320	916.5	847	469.5	1	slr0779				hypothetical protein	1320	916.5	403.5	453.5	0.0172247			847	469.5	377.5	0.0182831		1.06145			slr0779		hypothetical protein	0.0165099	1.20896	0.208611	0.0165099	1.20896
slr0099	2376	920	1490	460	1	slr0099		transposase	ISY352f	putative transposase gene of IS4 family insertion sequence ISY352f	2376	920	1456	1506	0.0572004			1490	460	1030	0.0498851		0.872111			slr0099	ISY352f	putative transposase gene of IS4 family insertion sequence ISY352f	0.054552	1.01944	0.208353	0.054552	1.01944
sll1430	1347	882	771	499	1	sll1430	apt	adenine phosphoribosyltransferase	apt	adenine phosphoribosyltransferase	1347	882	465	515	0.0195606			771	499	272	0.0131735		0.673474			sll1430	apt	adenine phosphoribosyltransferase	0.0183633	0.916443	0.34361	0.0183633	0.916443
slr2018	1499	915	750	517.5	1	slr2018				hypothetical protein	1499	915	584	634	0.0240804			750	517.5	232.5	0.0112605		0.46762			slr2018		hypothetical protein	0.0223997	0.554008	0.122171	0.0223997	0.554008
sll1485	1591	920.5	880	537	1	sll1485				hypothetical protein	1591	920.5	670.5	720.5	0.0273658			880	537	343	0.0166122		0.607043			sll1485		hypothetical protein	0.0258478	0.651529	0.0629125	0.0258478	0.651529
slr0723	1428	899.5	923	566.5	1	slr0723				hypothetical protein	1428	899.5	528.5	578.5	0.0219724			923	566.5	356.5	0.017266		0.785806			slr0723		hypothetical protein	0.019492	0.815508	0.0420044	0.019492	0.815508
sll1505	1066	888	729	550	1	sll1505				hypothetical protein	1066	888	178	228	0.00865982			729	550	179	0.00866935		1.0011			sll1505		hypothetical protein	0.00923448	0.893976	0.151497	0.00923448	0.893976
slr0890	1169	879	739	534.5	1	slr0890				hypothetical protein	1169	879	290	340	0.0129138			739	534.5	204.5	0.00990437		0.766962			slr0890		hypothetical protein	0.0117283	0.816858	0.0705635	0.0117283	0.816858
slr1912	1583	887	1078	536.5	1	slr1912				putative PP2C-type protein phosphatase, anti-sigma F factor antagonist	1583	887	696	746	0.0283343			1078	536.5	541.5	0.026226		0.925591			slr1912		putative PP2C-type protein phosphatase, anti-sigma F factor antagonist	0.0251059	0.902318	0.0329123	0.0251059	0.902318
ssr1256	1574	902	933	519.5	1	ssr1256				hypothetical protein	1574	902	672	722	0.0274228			933	519.5	413.5	0.0200267		0.730294			ssr1256		hypothetical protein	0.0241577	0.843302	0.159818	0.0241577	0.843302
sll0010	1151	869	789	564	1	sll0010				hypothetical protein	1151	869	282	332	0.0126099			789	564	225	0.0108972		0.864179			sll0010		hypothetical protein	0.012957	0.83761	0.0375752	0.012957	0.83761
sll0822	2039	861.5	1561	532	1	sll0822				hypothetical protein	2039	861.5	1177.5	1227.5	0.0466225			1561	532	1029	0.0498366		1.06894			sll0822		hypothetical protein	0.0418579	1.02335	0.064471	0.0418579	1.02335
ssr3532	1130	845	760	548	1	ssr3532				hypothetical protein	1130	845	285	335	0.0127239			760	548	212	0.0102676		0.806957			ssr3532		hypothetical protein	0.012512	0.852596	0.0645425	0.012512	0.852596
ssr0657	1396	850	876	527	1	ssr0657				hypothetical protein	1396	850	546	596	0.0226371			876	527	349	0.0169028		0.746687			ssr0657		hypothetical protein	0.0197181	0.815889	0.0978671	0.0197181	0.815889
ssr1499	1097	849	694	515	1	ssr1499		ABC1-like		ABC1-like	1097	849	248	298	0.0113185			694	515	179	0.00866935		0.765942			ssr1499		ABC1-like	0.0113845	0.749311	0.0235208	0.0113845	0.749311
slr1469	2293	834.5	2018	517.5	1	slr1469			rnpA	ribonuclease P (RNase P) protein component	2293	834.5	1458.5	1508.5	0.0572953			2018	517.5	1500.5	0.0726724		1.26838			slr1469	rnpA	ribonuclease P (RNase P) protein component	0.0488163	1.38901	0.170598	0.0488163	1.38901
ssr2708	1419	849.5	1016	532	1	ssr2708				hypothetical protein	1419	849.5	569.5	619.5	0.0235296			1016	532	484	0.0234411		0.996239			ssr2708		hypothetical protein	0.0197879	0.911564	0.119748	0.0197879	0.911564
ssl2233	4515	1058	3607	462	1	ssl2233	rps20	30S ribosomal protein S20	rpsT, rps20	30S ribosomal protein S20	4515	1058	3457	3507	0.133202			3607	462	3145	0.152319		1.14352			ssl2233	rpsT, rps20	30S ribosomal protein S20	0.137582	1.25855	0.162682	0.137582	1.25855
slr0668	1127	928	629	448.5	1	slr0668				hypothetical protein	1127	928	199	249	0.00945743			629	448.5	180.5	0.008742		0.924352			slr0668		hypothetical protein	0.0108498	0.966133	0.059088	0.0108498	0.966133
sll1028	4075	894.5	2340	509.5	1	sll1028	ccmK	carbon dioxide concentrating mechanism protein CcmK	ccmK2	carbon dioxide concentrating mechanism protein CcmK homolog 2, putative carboxysome assembly protein	4075	894.5	3180.5	3230.5	0.1227			2340	509.5	1830.5	0.088655		0.722536			sll1028	ccmK2	carbon dioxide concentrating mechanism protein CcmK homolog 2, putative carboxysome assembly protein	0.136222	0.796199	0.104176	0.136222	0.796199
slr1828	1488	871	1028	526	1	slr1828	petF	ferredoxin	petF, fdx	ferredoxin, petF-like protein, no detectable expression	1488	871	617	667	0.0253338			1028	526	502	0.0243129		0.959704			slr1828	petF, fdx	ferredoxin, petF-like protein, no detectable expression	0.0266275	1.03087	0.100639	0.0266275	1.03087
ssl1046	3803	921.5	2330	527.5	1	ssl1046				hypothetical protein	3803	921.5	2881.5	2931.5	0.111343			2330	527.5	1802.5	0.0872989		0.784052			ssl1046		hypothetical protein	0.115395	0.863038	0.111703	0.115395	0.863038
slr1101	1274	910	802	525	1	slr1101				hypothetical protein	1274	910	364	414	0.0157244			802	525	277	0.0134157		0.853176			slr1101		hypothetical protein	0.0161845	0.90581	0.0744348	0.0161845	0.90581
ssr2016	1114	916	1357	524.5	1	ssr2016				hypothetical protein	1114	916	198	248	0.00941945			1357	524.5	832.5	0.0403197		4.28047			ssr2016		hypothetical protein	0.00986532	4.14302	0.19439	0.00986532	4.14302
ssl1552	1190	918.5	792	540	1	ssl1552				hypothetical protein	1190	918.5	271.5	321.5	0.0122111			792	540	252	0.0122049		0.999491			ssl1552		hypothetical protein	0.0120721	1.04055	0.0580597	0.0120721	1.04055
slr1425	1536	892.5	866	502.5	1	slr1425				hypothetical protein	1536	892.5	643.5	693.5	0.0263403			866	502.5	363.5	0.0176051		0.668371			slr1425		hypothetical protein	0.0252095	0.77909	0.156581	0.0252095	0.77909
ssl1520	1168	874.5	678	457.5	1	ssl1520				hypothetical protein	1168	874.5	293.5	343.5	0.0130467			678	457.5	220.5	0.0106793		0.818543			ssl1520		hypothetical protein	0.0125382	0.91247	0.132834	0.0125382	0.91247
ssl0020	1825	895	1429	469	1	ssl0020	petF	ferredoxin	petF, fed1	ferredoxin I, essential for growth, expression is induced by light	1825	895	930	980	0.037222			1429	469	960	0.0464948		1.24912			ssl0020	petF, fed1	ferredoxin I, essential for growth, expression is induced by light	0.0367618	1.38294	0.189252	0.0367618	1.38294
ssr2087	1309	911	747	455	1	ssr2087				hypothetical protein	1309	911	398	448	0.0170158			747	455	292	0.0141422		0.831121			ssr2087		hypothetical protein	0.0168688	0.914952	0.118556	0.0168688	0.914952
ssl3044	1225	899	1457	498.5	1	ssl3044		hydrogenase component		hydrogenase component	1225	899	326	376	0.0142811			1457	498.5	958.5	0.0464222		3.2506			ssl3044		hydrogenase component	0.0140147	3.54422	0.415236	0.0140147	3.54422
ssr2595	1117	883.5	1336	499	1	ssr2595		high light inducible protein	hliB, scpD	high light inducible protein	1117	883.5	233.5	283.5	0.0107678			1336	499	837	0.0405377		3.76471			ssr2595	hliB, scpD	high light inducible protein	0.0113408	3.87789	0.160061	0.0113408	3.87789
sll1767	1456	879	1044	510	1	sll1767	rps6	30S ribosomal protein S6	rpsF, rps6	30S ribosomal protein S6	1456	879	577	627	0.0238145			1044	510	534	0.0258627		1.08601			sll1767	rpsF, rps6	30S ribosomal protein S6	0.0235411	1.09772	0.0165584	0.0235411	1.09772
slr1186	1213	872	864	579	1	slr1186				hypothetical protein	1213	872	341	391	0.0148508			864	579	285	0.0138032		0.929453			slr1186		hypothetical protein	0.0143671	0.945363	0.0225001	0.0143671	0.945363
slr1847	1877	854.5	1683	567	1	slr1847		hypothetical protein		hypothetical protein	1877	854.5	1022.5	1072.5	0.0407353			1683	567	1116	0.0540502		1.32686			slr1847		hypothetical protein	0.0372923	1.31928	0.0107284	0.0372923	1.31928
sll0481	1250	881	843	524.5	1	sll0481				hypothetical protein	1250	881	369	419	0.0159143			843	524.5	318.5	0.0154256		0.969292			sll0481		hypothetical protein	0.0153526	0.942773	0.0375041	0.0153526	0.942773
sll0062	1677	866	1233	529.5	1	sll0062				hypothetical protein	1677	866	811	861	0.0327022			1233	529.5	703.5	0.034072		1.04189			sll0062		hypothetical protein	0.0288249	1.02847	0.0189692	0.0288249	1.02847
ssr1558	1226	871.5	874	541	1	ssr1558		hypothetical protein		hypothetical protein	1226	871.5	354.5	404.5	0.0153636			874	541	333	0.0161279		1.04975			ssr1558		hypothetical protein	0.0143435	1.01699	0.0463232	0.0143435	1.01699
slr1628	1312	915.5	781	518	1	slr1628				hypothetical protein	1312	915.5	396.5	446.5	0.0169588			781	518	263	0.0127376		0.751093			slr1628		hypothetical protein	0.0154887	0.802752	0.0730565	0.0154887	0.802752
ssl0426	1272	925	783	516.5	1	ssl0426		transposase	ISY100t	putative transposase gene of IS630 family insertion sequence ISY100t	1272	925	347	397	0.0150787			783	516.5	266.5	0.0129072		0.855985			ssl0426	ISY100t	putative transposase gene of IS630 family insertion sequence ISY100t	0.0129267	1.04371	0.265488	0.0129267	1.04371
sll1147	1377	866	886	522	1	sll1147				glutathione S-transferase	1377	866	511	561	0.0213077			886	522	364	0.0176293		0.827366			sll1147		glutathione S-transferase	0.0181073	0.898554	0.100674	0.0181073	0.898554
sll1660	1204	840	809	521	1	sll1660				hypothetical protein	1204	840	364	414	0.0157244			809	521	288	0.0139484		0.887057			sll1660		hypothetical protein	0.0140895	0.96169	0.105547	0.0140895	0.96169
slr1205	2281	866.5	2374	520	1	slr1205				hypothetical protein	2281	866.5	1414.5	1464.5	0.0556241			2374	520	1854	0.0897931		1.61428			slr1205		hypothetical protein	0.046407	1.63348	0.0271492	0.046407	1.63348
slr0556	1274	853	891	529	1	slr0556		hypothetical protein		hypothetical protein	1274	853	421	471	0.0178894			891	529	362	0.0175324		0.980047			slr0556		hypothetical protein	0.0154712	1.03782	0.0817013	0.0154712	1.03782
sll1512	1145	852	854	511	1	sll1512		hypothetical protein		hypothetical protein	1145	852	293	343	0.0130277			854	511	343	0.0166122		1.27514			sll1512		hypothetical protein	0.0119784	1.09343	0.256988	0.0119784	1.09343
slr0912	1322	860.5	890	538	1	slr0912				hypothetical protein	1322	860.5	461.5	511.5	0.0194276			890	538	352	0.0170481		0.877519			slr0912		hypothetical protein	0.0169645	0.912267	0.0491412	0.0169645	0.912267
slr0363	1170	847	831	530.5	1	slr0363				hypothetical protein	1170	847	323	373	0.0141672			831	530.5	300.5	0.0145538		1.02729			slr0363		hypothetical protein	0.0137646	0.957013	0.0993938	0.0137646	0.957013
slr0193	4732	879.5	2481	392.5	1	slr0193		RNA-binding protein	rbp3	putative RNA-binding protein	4732	879.5	3852.5	3902.5	0.148223			2481	392.5	2088.5	0.10115		0.682419			slr0193	rbp3	putative RNA-binding protein	0.165155	0.804573	0.172752	0.165155	0.804573
sll1440	1618	907	858	444	1	sll1440	pdxH	pyridoxamine 5'-phosphate oxidase	pdxH	pyridoxamine 5-phosphate oxidase	1618	907	711	761	0.028904			858	444	414	0.0200509		0.693705			sll1440	pdxH	pyridoxamine 5-phosphate oxidase	0.030556	0.772435	0.111341	0.030556	0.772435
slr0343	2235	881	1418	488	1	slr0343	petD	cytochrome b6-f complex subunit 4	petD	cytochrome b6-f complex subunit PetD	2235	881	1354	1404	0.0533263			1418	488	930	0.0450419		0.844647			slr0343	petD	cytochrome b6-f complex subunit PetD	0.0605221	0.913115	0.0968277	0.0605221	0.913115
slr0172	1781	872	1162	550	1	slr0172	guaB	IMP dehydrogenase	guaB	IMP dehydrogenase	1781	872	909	959	0.0364244			1162	550	612	0.0296404		0.813752			slr0172	guaB	IMP dehydrogenase	0.0360347	0.931915	0.167107	0.0360347	0.931915
ssl3692	1144	885	715	476	1	ssl3692				hypothetical protein	1144	885	259	309	0.0117363			715	476	239	0.0115753		0.986277			ssl3692		hypothetical protein	0.0112169	0.954041	0.0455889	0.0112169	0.954041
sll1262	2626	916	1427	510.5	1	sll1262				hypothetical protein	2626	916	1710	1760	0.0668477			1427	510.5	916.5	0.044388		0.664017			sll1262		hypothetical protein	0.0673214	0.699064	0.0495635	0.0673214	0.699064
slr2073	6885	912	2540	520	1	slr2073			ycf50	hypothetical protein	6885	912	5973	6023	0.228764			2540	520	2020	0.0978329		0.427659			slr2073	ycf50	hypothetical protein	0.230547	0.45088	0.0328386	0.230547	0.45088
slr1811	1700	885.5	1137	468	1	slr1811		hypothetical protein		hypothetical protein	1700	885.5	814.5	864.5	0.0328351			1137	468	669	0.0324011		0.98678			slr1811		hypothetical protein	0.0325409	1.17383	0.264523	0.0325409	1.17383
sll1488	1429	870	828	481	1	sll1488				hypothetical protein	1429	870	559	609	0.0231308			828	481	347	0.0168059		0.72656			sll1488		hypothetical protein	0.0233827	0.750466	0.0338085	0.0233827	0.750466
slr1383	1468	909.5	1194	523	1	slr1383				hypothetical protein	1468	909.5	558.5	608.5	0.0231118			1194	523	671	0.0324979		1.40612			slr1383		hypothetical protein	0.0210947	1.43914	0.0467047	0.0210947	1.43914
slr0517	1161	880.5	677	459.5	1	slr0517				hypothetical protein	1161	880.5	280.5	330.5	0.0125529			677	459.5	217.5	0.010534		0.839165			slr0517		hypothetical protein	0.0134789	0.797702	0.0586377	0.0134789	0.797702
sll1192	1232	880.5	951	490	1	sll1192				hypothetical protein	1232	880.5	351.5	401.5	0.0152496			951	490	461	0.0223272		1.46411			sll1192		hypothetical protein	0.0153099	1.56171	0.138029	0.0153099	1.56171
sll0067	1355	888.5	876	485	1	sll0067	gst or parB	glutathione S-transferase	gst, parB	glutathione S-transferase	1355	888.5	466.5	516.5	0.0196175			876	485	391	0.018937		0.965308			sll0067	gst, parB	glutathione S-transferase	0.0199558	1.00608	0.0576553	0.0199558	1.00608
sll0584	1738	899	1029	519.5	1	sll0584	ycf36	hypothetical protein	ycf36	hypothetical protein	1738	899	839	889	0.0337657			1029	519.5	509.5	0.0246762		0.730806			sll0584	ycf36	hypothetical protein	0.0299746	0.761728	0.0437307	0.0299746	0.761728
sll0909	1189	864.5	840	523.5	1	sll0909				hypothetical protein	1189	864.5	324.5	374.5	0.0142241			840	523.5	316.5	0.0153288		1.07766			sll0909		hypothetical protein	0.0136772	0.902533	0.247665	0.0136772	0.902533
slr0058	1251	882	952	566.5	1	slr0058				hypothetical protein	1251	882	369	419	0.0159143			952	566.5	385.5	0.0186706		1.17319			slr0058		hypothetical protein	0.0146768	1.21469	0.0586838	0.0146768	1.21469
slr1970	1414	849.5	977	544	1	slr1970				hypothetical protein	1414	849.5	564.5	614.5	0.0233397			977	544	433	0.0209711		0.898515			slr1970		hypothetical protein	0.0212473	0.924974	0.0374185	0.0212473	0.924974
sll0947	3519	888.5	4270	522	1	sll0947	lrtA	light repressed protein	lrtA	light repressed protein A homolog	3519	888.5	2630.5	2680.5	0.10181			4270	522	3748	0.181524		1.78297			sll0947	lrtA	light repressed protein A homolog	0.0891857	1.876	0.131575	0.0891857	1.876
slr1259	1393	864.5	1140	535	1	slr1259		hypothetical protein		hypothetical protein	1393	864.5	528.5	578.5	0.0219724			1140	535	605	0.0293014		1.33356			slr1259		hypothetical protein	0.0197526	1.30355	0.0424322	0.0197526	1.30355
slr0477	2425	864.5	1611	507.5	1	slr0477	purN	phosphoribosylglycinamide formyltransferase	purN	phosphoribosylglycinamide formyltransferase	2425	864.5	1560.5	1610.5	0.0611695			1611	507.5	1103.5	0.0534448		0.873717			slr0477	purN	phosphoribosylglycinamide formyltransferase	0.0564206	0.88048	0.00956318	0.0564206	0.88048
slr0951	1184	905	811	514	1	slr0951		hypothetical protein		4-diphosphocytidyl-2C-methyl-D-erythritol synthase	1184	905	279	329	0.012496			811	514	297	0.0143843		1.15112			slr0951		4-diphosphocytidyl-2C-methyl-D-erythritol synthase	0.0124656	1.01876	0.187188	0.0124656	1.01876
slr0171	1414	885	1099	532.5	1	slr0171	ycf37	ycf37 gene product	ycf37	ycf37 gene product	1414	885	529	579	0.0219914			1099	532.5	566.5	0.0274368		1.24762			slr0171	ycf37	ycf37 gene product	0.0197718	1.17899	0.0970463	0.0197718	1.17899
slr2122	2044	843	1670	520.5	1	slr2122				hypothetical protein	2044	843	1201	1251	0.0475151			1670	520.5	1149.5	0.0556727		1.17169			slr2122		hypothetical protein	0.040296	1.16725	0.00626591	0.040296	1.16725
sll0913	1171	832	751	528	1	sll0913		hypothetical protein		hypothetical protein	1171	832	339	389	0.0147749			751	528	223	0.0108004		0.730995			sll0913		hypothetical protein	0.0128616	0.778108	0.0666274	0.0128616	0.778108
slr1222	1161	864	887	520	1	slr1222				hypothetical protein	1161	864	297	347	0.0131796			887	520	367	0.0177746		1.34864			slr1222		hypothetical protein	0.012315	1.21763	0.185276	0.012315	1.21763
sll0810	1041	863	672	532.5	1	sll0810				hypothetical protein	1041	863	178	228	0.00865982			672	532.5	139.5	0.00675628		0.780187			sll0810		hypothetical protein	0.00853935	0.761102	0.0269901	0.00853935	0.761102
sll0643	1599	878.5	1010	522	1	sll0643	ureG	urease accessory protein G	ureG	urease accessory protein G	1599	878.5	720.5	770.5	0.0292649			1010	522	488	0.0236349		0.807619			sll0643	ureG	urease accessory protein G	0.024345	0.854301	0.0660186	0.024345	0.854301
slr1994	1292	825.5	929	542.5	1	slr1994	fabG	3-ketoacyl-acyl carrier protein reductase	phaB, fabG2	3-oxoacyl-[acyl-carrier protein] reductase 2	1292	825.5	466.5	516.5	0.0196175			929	542.5	386.5	0.018719		0.954198			slr1994	phaB, fabG2	3-oxoacyl-[acyl-carrier protein] reductase 2	0.0158526	0.879651	0.105425	0.0158526	0.879651
slr1118	1276	879	842	525.5	1	slr1118	rffM	UDP-N-acetyl-D-mannosaminuronic acid transferase	rffM	UDP-N-acetyl-D-mannosaminuronic acid transferase	1276	879	397	447	0.0169778			842	525.5	316.5	0.0153288		0.902871			slr1118	rffM	UDP-N-acetyl-D-mannosaminuronic acid transferase	0.0145327	0.876411	0.0374199	0.0145327	0.876411
slr1545	5452	937	2211	416	1	slr1545	rpoE	RNA polymerase sigma-E factor	sigG, rpoE	RNA polymerase ECF-type (group 3) sigma-E factor	5452	937	4515	4565	0.173386			2211	416	1795	0.0869356		0.501399			slr1545	sigG, rpoE	RNA polymerase ECF-type (group 3) sigma-E factor	0.208323	0.579183	0.110004	0.208323	0.579183
slr0989	1851	867.5	1058	445	1	slr0989		hypothetical protein		hypothetical protein	1851	867.5	983.5	1033.5	0.039254			1058	445	613	0.0296889		0.756327			slr0989		hypothetical protein	0.0404908	0.764807	0.0119924	0.0404908	0.764807
sll1286	1205	870	711	490	1	sll1286				hypothetical protein	1205	870	335	385	0.0146229			711	490	221	0.0107035		0.731966			sll1286		hypothetical protein	0.0139153	0.889781	0.223184	0.0139153	0.889781
sll1553	2171	906	1433	524.5	1	sll1553	pheT	phenylalanyl-tRNA synthetase	pheT	phenylalanyl-tRNA synthetase beta chain	2171	906	1265	1315	0.0499459			1433	524.5	908.5	0.0440006		0.880965			sll1553	pheT	phenylalanyl-tRNA synthetase beta chain	0.0510309	0.913014	0.0453241	0.0510309	0.913014
slr0676	2434	864.5	1672	490.5	1	slr0676	cysC	adenylylsulfate 3'-phosphotransferase	cysC	adenylylsulfate 3-phosphotransferase	2434	864.5	1569.5	1619.5	0.0615113			1672	490.5	1181.5	0.0572225		0.930277			slr0676	cysC	adenylylsulfate 3-phosphotransferase	0.0619113	0.981943	0.0730677	0.0619113	0.981943
slr1855	4276	832	2139	467	1	slr1855				hypothetical protein	4276	832	3444	3494	0.132708			2139	467	1672	0.0809785		0.610201			slr1855		hypothetical protein	0.134757	0.657193	0.0664571	0.134757	0.657193
slr0346	1510	875	959	507.5	1	slr0346	rnc	ribonuclease III	rnc	ribonuclease III	1510	875	635	685	0.0260174			959	507.5	451.5	0.0218671		0.840478			slr0346	rnc	ribonuclease III	0.0240537	0.833333	0.0101053	0.0240537	0.833333
slr0823	2553	873.5	1651	511	1	slr0823	ycf3	hypothetical protein	ycf3	hypothetical protein	2553	873.5	1679.5	1729.5	0.0656893			1651	511	1140	0.0552126		0.840512			slr0823	ycf3	hypothetical protein	0.0600805	0.896994	0.0798784	0.0600805	0.896994
sll0356	1175	868	634	457.5	1	sll0356	trpF	5'-phosphoribosyl anthranilate isomerase	trpF	N-(5'-phosphoribosyl)anthranilate isomerase	1175	868	307	357	0.0135595			634	457.5	176.5	0.00854827		0.630429			sll0356	trpF	N-(5'-phosphoribosyl)anthranilate isomerase	0.0137021	0.74685	0.164644	0.0137021	0.74685
sll1159	1260	853	851	484	1	sll1159				hypothetical protein	1260	853	407	457	0.0173576			851	484	367	0.0177746		1.02402			sll1159		hypothetical protein	0.0170204	1.03654	0.0177059	0.0170204	1.03654
sll1371	1183	841	755	494	1	sll1371		catabolite gene activator protein	sycrp1	cAMP receptor protein, essential for motility	1183	841	342	392	0.0148888			755	494	261	0.0126408		0.849012			sll1371	sycrp1	cAMP receptor protein, essential for motility	0.0137972	0.875543	0.0375206	0.0137972	0.875543
slr1397	1955	850	1334	438	1	slr1397				hypothetical protein	1955	850	1105	1155	0.0438688			1334	438	896	0.0433952		0.989203			slr1397		hypothetical protein	0.0409058	1.12867	0.197241	0.0409058	1.12867
sll1423	1934	887	1184	481	1	sll1423	ntcA	global nitrogen regulator	ntcA	global nitrogen regulator, CRP family protein, 2-oxoglutarate-dependent transcriptional activator	1934	887	1047	1097	0.0416659			1184	481	703	0.0340478		0.817162			sll1423	ntcA	global nitrogen regulator, CRP family protein, 2-oxoglutarate-dependent transcriptional activator	0.040374	0.926085	0.15404	0.040374	0.926085
sll1186	1546	858	1082	513	1	sll1186				hypothetical protein	1546	858	688	738	0.0280305			1082	513	569	0.0275579		0.98314			sll1186		hypothetical protein	0.0259098	1.04769	0.0912872	0.0259098	1.04769
slr1879	1017	903.5	680	541	1	slr1879	cbiL or cobI	S-adenosyl-methionine: precorrin-2 methyltransferase	cbiL, cobI	S-adenosyl-methionine:precorrin-2 methyltransferase	1017	903.5	113.5	163.5	0.00621			680	541	139	0.00673206		1.08407			slr1879	cbiL, cobI	S-adenosyl-methionine:precorrin-2 methyltransferase	0.00779717	0.806105	0.393099	0.00779717	0.806105
slr0927	4697	896.5	2685	512	1	slr0927	psbD2	photosystem II D2 protein	psbD2	photosystem II reaction center D2 protein	4697	896.5	3800.5	3850.5	0.146248			2685	512	2173	0.105243		0.719618			slr0927	psbD2	photosystem II reaction center D2 protein	0.142754	0.72016	0.000766483	0.142754	0.72016
sll1824	3730	878	4220	554	1	sll1824			rplY, rpl25	50S ribosomal protein L25	3730	878	2852	2902	0.110223			4220	554	3666	0.177552		1.61085			sll1824	rplY, rpl25	50S ribosomal protein L25	0.0997063	1.49845	0.158949	0.0997063	1.49845
sll1520	1127	871	784	536.5	1	sll1520	recN	DNA repair protein RecN	recN	DNA repair protein RecN	1127	871	256	306	0.0116224			784	536.5	247.5	0.0119869		1.03137			sll1520	recN	DNA repair protein RecN	0.0117392	0.990333	0.0580304	0.0117392	0.990333
sll0995	1647	868	1275	541	1	sll0995				hypothetical protein	1647	868	779	829	0.0314868			1275	541	734	0.0355492		1.12902			sll0995		hypothetical protein	0.0274062	1.06804	0.0862305	0.0274062	1.06804
sll1883	2022	874	1772	508	1	sll1883	argJ	ornithine acetyltransferase	argJ	glutamate N-acetyltransferase / amino-acid N-acetyltransferase	2022	874	1148	1198	0.045502			1772	508	1264	0.0612182		1.34539			sll1883	argJ	glutamate N-acetyltransferase / amino-acid N-acetyltransferase	0.0389612	1.35227	0.00972789	0.0389612	1.35227
slr1307	1109	875	693	522	1	slr1307				hypothetical protein	1109	875	234	284	0.0107868			693	522	171	0.00828189		0.767781			slr1307		hypothetical protein	0.00861806	0.888214	0.170318	0.00861806	0.888214
slr1208	1530	883.5	910	525	1	slr1208		short-chain alcohol dehydrogenase family		short-chain alcohol dehydrogenase family	1530	883.5	646.5	696.5	0.0264542			910	525	385	0.0186464		0.704854			slr1208		short-chain alcohol dehydrogenase family	0.0228432	0.791335	0.122303	0.0228432	0.791335
slr0906	3757	880	1922	531	1	slr0906	psbB	photosystem II P680 chlorophyll A apoprotein	psbB	photosystem II core light harvesting protein	3757	880	2877	2927	0.111172			1922	531	1391	0.0673691		0.605988			slr0906	psbB	photosystem II core light harvesting protein	0.106235	0.634532	0.0403684	0.106235	0.634532
slr2005	1915	888	1199	537	1	slr2005				periplasmic protein, function unknown	1915	888	1027	1077	0.0409063			1199	537	662	0.0320621		0.783794			slr2005		periplasmic protein, function unknown	0.0335931	0.818198	0.0486555	0.0335931	0.818198
sll0617	5075	865.5	3607	515.5	1	sll0617	im30	chloroplast membrane-associated 30 kD protein	vipp1, im30	plasma membrane protein essential for thylakoid formation	5075	865.5	4209.5	4259.5	0.161783			3607	515.5	3091.5	0.149728		0.925486			sll0617	vipp1, im30	plasma membrane protein essential for thylakoid formation	0.133529	0.953153	0.0391268	0.133529	0.953153
sll1931	4416	845	2876	532.5	1	sll1931	gylA	serine hydroxymethyltransferase	glyA	serine hydroxymethyltransferase	4416	845	3571	3621	0.137532			2876	532.5	2343.5	0.113501		0.82527			sll1931	glyA	serine hydroxymethyltransferase	0.109943	0.829051	0.00534781	0.109943	0.829051
slr0066	1158.5	833.5	829.5	526.5	1	slr0066	ribG	riboflavin biosynthesis protein	ribD	diaminohydroxyphosphoribosylaminopyrimidine deaminase / 5-amino-6-(5-phosphoribosylamino)uracil reductase	1158.5	833.5	325	375	0.0142431			829.5	526.5	303	0.0146749		1.03032			slr0066	ribD	diaminohydroxyphosphoribosylaminopyrimidine deaminase / 5-amino-6-(5-phosphoribosylamino)uracil reductase	0.0127599	0.984432	0.0648908	0.0127599	0.984432
slr1596	1190	848	801	499	1	slr1596		hypothetical protein	pxcA	involved in light-induced proton extrusion	1190	848	342	392	0.0148888			801	499	302	0.0146265		0.982382			slr1596	pxcA	involved in light-induced proton extrusion	0.0138455	0.942859	0.0558933	0.0138455	0.942859
slr0374	4727	895.5	1998	536.5	1	slr0374		cell division cycle protein		putative cell division cycle protein	4727	895.5	3831.5	3881.5	0.147426			1998	536.5	1461.5	0.0707835		0.48013			slr0374		putative cell division cycle protein	0.120586	0.485546	0.00765905	0.120586	0.485546
sll1021	2231	838.5	1141	524	1	sll1021				hypothetical protein	2231	838.5	1392.5	1442.5	0.0547885			1141	524	617	0.0298826		0.545417			sll1021		hypothetical protein	0.0417411	0.603324	0.0818933	0.0417411	0.603324
slr0327	1520	867	906	434.5	1	slr0327	hitB	iron utilization protein	futB, hitB	ABC-type iron transport system permease protein	1520	867	653	703	0.0267011			906	434.5	471.5	0.0228357		0.855236			slr0327	futB, hitB	ABC-type iron transport system permease protein	0.0246851	0.96851	0.160194	0.0246851	0.96851
sll0938	1222	846	918	446.5	1	sll0938		aspartate transaminase		N-succinyldiaminopimelate aminotransferase	1222	846	376	426	0.0161802			918	446.5	471.5	0.0228357		1.41134			sll0938		N-succinyldiaminopimelate aminotransferase	0.0163835	1.55619	0.204843	0.0163835	1.55619
sll0270	1301	890.5	759	529.5	1	sll0270	priA	primosomal protein N'	priA	primosomal protein N	1301	890.5	410.5	460.5	0.0174906			759	529.5	229.5	0.0111152		0.635495			sll0270	priA	primosomal protein N	0.015378	0.779907	0.204229	0.015378	0.779907
sll1681	1525	865.5	1175	526	1	sll1681				hypothetical protein	1525	865.5	659.5	709.5	0.026948			1175	526	649	0.0314324		1.16641			sll1681		hypothetical protein	0.0261989	1.25113	0.119807	0.0261989	1.25113
slr1691	1524	895.5	930	503.5	1	slr1691	nadE or adgA	NH(3)-dependent NAD(+) synthetase	nadE, adgA	NH(3)-dependent NAD(+) synthetase	1524	895.5	628.5	678.5	0.0257706			930	503.5	426.5	0.0206563		0.801546			slr1691	nadE, adgA	NH(3)-dependent NAD(+) synthetase	0.0261701	0.828742	0.0384612	0.0261701	0.828742
sll0704	1693	856	1059	506	1	sll0704	nifS	NifS protein	nifS2	NifS protein, facilitates iron-sulfur cluster assembly	1693	856	837	887	0.0336897			1059	506	553	0.026783		0.794989			sll0704	nifS2	NifS protein, facilitates iron-sulfur cluster assembly	0.0329585	0.797991	0.00424586	0.0329585	0.797991
sll1098	21635	888	17870	504.5	1	sll1098	fus	elongation factor EF-G	fusB, fus	elongation factor EF-G 2	21635	888	20747	20797	0.789905			17870	504.5	17365.5	0.841048		1.06475			sll1098	fusB, fus	elongation factor EF-G 2	0.741246	1.12481	0.0849363	0.741246	1.12481
sll0898	1549	852	1265	532.5	1	sll0898		hypothetical protein		hypothetical protein	1549	852	697	747	0.0283723			1265	532.5	732.5	0.0354765		1.25039			sll0898		hypothetical protein	0.0269979	1.27398	0.0333579	0.0269979	1.27398
slr0418	1295	897	796	470	1	slr0418				hypothetical protein	1295	897	398	448	0.0170158			796	470	326	0.0157889		0.927895			slr0418		hypothetical protein	0.0175929	1.04003	0.158586	0.0175929	1.04003
sll0997	1563	842.5	1061	481.5	1	sll0997				hypothetical protein	1563	842.5	720.5	770.5	0.0292649			1061	481.5	579.5	0.0280664		0.959048			sll0997		hypothetical protein	0.0290565	0.940802	0.0258028	0.0290565	0.940802
slr0492	1171	859.5	713	513	1	slr0492	menE	O-succinylbenzoic acid--CoA ligase	menE	O-succinylbenzoic acid-CoA ligase	1171	859.5	311.5	361.5	0.0137304			713	513	200	0.00968642		0.705474			slr0492	menE	O-succinylbenzoic acid-CoA ligase	0.0135173	0.790272	0.119922	0.0135173	0.790272
slr1753	1281	840	755	391	1	slr1753				hypothetical protein	1281	840	441	491	0.018649			755	391	364	0.0176293		0.945321			slr1753		hypothetical protein	0.0177723	0.914969	0.0429236	0.0177723	0.914969
slr0018	1335	867.5	774	434	1	slr0018	fumC	fumarase	fumC	fumarate hydratase	1335	867.5	467.5	517.5	0.0196555			774	434	340	0.0164669		0.837776			slr0018	fumC	fumarate hydratase	0.018459	0.912359	0.105476	0.018459	0.912359
sll0649	1215	882	754	501	1	sll0649	phoP	regulatory components of sensory transduction system	rre3	two-component response regulator (OmpR subfamily)	1215	882	333	383	0.014547			754	501	253	0.0122533		0.842328			sll0649	rre3	two-component response regulator (OmpR subfamily)	0.0142635	0.9151	0.102915	0.0142635	0.9151
sll0163	1490.5	901	722	485	1	sll0163		beta transducin-like protein		beta transducin-like protein	1490.5	901	589.5	639.5	0.0242893			722	485	237	0.0114784		0.472571			sll0163		beta transducin-like protein	0.0209594	0.525474	0.0748165	0.0209594	0.525474
sll0926	1372	923	946	512	1	sll0926		hypothetical protein		hypothetical protein	1372	923	449	499	0.0189528			946	512	434	0.0210195		1.10904			sll0926		hypothetical protein	0.0172774	1.19482	0.121311	0.0172774	1.19482
slr0144	5242	906	2553	544.5	1	slr0144				hypothetical protein	5242	906	4336	4386	0.166588			2553	544.5	2008.5	0.0972759		0.583932			slr0144		hypothetical protein	0.147304	0.571134	0.0181004	0.147304	0.571134
slr1300	1425	857	1086	531.5	1	slr1300	ubiH or visB	UbiH protein	ubiH, visB	UbiH protein	1425	857	568	618	0.0234727			1086	531.5	554.5	0.0268556		1.14412			slr1300	ubiH, visB	UbiH protein	0.0211014	1.09509	0.069343	0.0211014	1.09509
sll1526	1893	872	1359	540.5	1	sll1526				hypothetical protein	1893	872	1021	1071	0.0406784			1359	540.5	818.5	0.0396417		0.974515			sll1526		hypothetical protein	0.0358446	0.875579	0.139917	0.0358446	0.875579
sll0227	2554	866.5	2026	526	1	sll0227	ppiB	peptidyl-prolyl cis-trans isomerase B	ppiB	peptidyl-prolyl cis-trans isomerase B, periplasmic protein.	2554	866.5	1687.5	1737.5	0.0659931			2026	526	1500	0.0726482		1.10084			sll0227	ppiB	peptidyl-prolyl cis-trans isomerase B, periplasmic protein.	0.0563898	1.10299	0.00302932	0.0563898	1.10299
sll1564	1384	894	830	516	1	sll1564	leuA	alpha-isopropylmalate synthase	leuA	alpha-isopropylmalate synthase	1384	894	490	540	0.0205101			830	516	314	0.0152077		0.741473			sll1564	leuA	alpha-isopropylmalate synthase	0.0174574	0.807097	0.0928062	0.0174574	0.807097
sll1406	3912	807.5	871	524	1	sll1406	fhuA	ferrichrome-iron receptor	fhuA	ferrichrome-iron receptor.	3912	807.5	3104.5	3154.5	0.119813			871	524	347	0.0168059		0.140268			sll1406	fhuA	ferrichrome-iron receptor.	0.101402	0.163446	0.0327795	0.101402	0.163446
sll1374	1415	856.5	928	523.5	1	sll1374	melB	melibiose carrier protein	melB	melibiose carrier protein	1415	856.5	558.5	608.5	0.0231118			928	523.5	404.5	0.0195908		0.847652			sll1374	melB	melibiose carrier protein	0.01927	0.975133	0.180286	0.01927	0.975133
slr1940	1663	883.5	1071	526.5	1	slr1940				periplasmic protein, function unknown	1663	883.5	779.5	829.5	0.0315058			1071	526.5	544.5	0.0263713		0.83703			slr1940		periplasmic protein, function unknown	0.0267978	0.869003	0.0452172	0.0267978	0.869003
sll0745	1273	868	884	511	1	sll0745	pfkA	phosphofructokinase	pfkA	phosphofructokinase	1273	868	405	455	0.0172817			884	511	373	0.0180652		1.04534			sll0745	pfkA	phosphofructokinase	0.0166349	1.01027	0.0495983	0.0166349	1.01027
sll1435	2150	842	1564	529.5	1	sll1435	pet112	PET112 protein	pet112	glutamyl-tRNA(Gln) amidotransferase subunit B	2150	842	1308	1358	0.0515791			1564	529.5	1034.5	0.050103		0.971382			sll1435	pet112	glutamyl-tRNA(Gln) amidotransferase subunit B	0.0434769	0.922432	0.069226	0.0434769	0.922432
sll0794	1246	808	885	538	1	sll0794	merR/cobH	mercuric resistance operon regulatory protein/precorrin isomerase	corR, merR, cobH, cbiC	cobalt-dependent transcriptional regulator (MerR (mercuric resistance operon regulatory protein)-like domain in N-terminal half), precorrin isomerase, Precorrin-8X methylmutase (in C-terminal half)	1246	808	438	488	0.0185351			885	538	347	0.0168059		0.906711			sll0794	corR, merR, cobH, cbiC	cobalt-dependent transcriptional regulator (MerR (mercuric resistance operon regulatory protein)-like domain in N-terminal half), precorrin isomerase, Precorrin-8X methylmutase (in C-terminal half)	0.0170588	0.951985	0.0640271	0.0170588	0.951985
sll1372	1242	815	866	514.5	1	sll1372				hypothetical protein	1242	815	427	477	0.0181173			866	514.5	351.5	0.0170239		0.939651			sll1372		hypothetical protein	0.0163383	0.881166	0.0827095	0.0163383	0.881166
slr0121	1306	828.5	857	511.5	1	slr0121				putative beta-lactamase	1306	828.5	477.5	527.5	0.0200353			857	511.5	345.5	0.0167333		0.835189			slr0121		putative beta-lactamase	0.0181469	0.874857	0.0560987	0.0181469	0.874857
slr1962	1353	843.5	868	502.5	1	slr1962				probable extracellular solute-binding protein	1353	843.5	509.5	559.5	0.0212507			868	502.5	365.5	0.0177019		0.833003			slr1962		probable extracellular solute-binding protein	0.0181271	0.82771	0.00748567	0.0181271	0.82771
sll0586	1209	863.5	730	452.5	1	sll0586		hypothetical protein		hypothetical protein	1209	863.5	345.5	395.5	0.0150217			730	452.5	277.5	0.0134399		0.894697			sll0586		hypothetical protein	0.0164704	0.99909	0.147635	0.0164704	0.99909
sll1228	1477	859	842	435	1	sll1228		sensory transduction histidine kinase	hik4	two-component hybrid histidine kinase	1477	859	618	668	0.0253718			842	435	407	0.0197119		0.776922			sll1228	hik4	two-component hybrid histidine kinase	0.0249473	0.751623	0.0357779	0.0249473	0.751623
slr0506	2198	841.5	1236	500.5	1	slr0506	pcr	protochlorophyllide oxido-reductase	por, pcr	light-dependent NADPH-protochlorophyllide oxidoreductase	2198	841.5	1356.5	1406.5	0.0534212			1236	500.5	735.5	0.0356218		0.66681			slr0506	por, pcr	light-dependent NADPH-protochlorophyllide oxidoreductase	0.0570166	0.729905	0.08923	0.0570166	0.729905
slr1518	2083	844.5	1196	492.5	1	slr1518	menA	menaquinone biosynthesis protein	menA	phylloquinone biosynthesis protein, probable 1,4-dihydroxy-2-naphthoic acid phytyltransferase	2083	844.5	1238.5	1288.5	0.0489394			1196	492.5	703.5	0.034072		0.696208			slr1518	menA	phylloquinone biosynthesis protein, probable 1,4-dihydroxy-2-naphthoic acid phytyltransferase	0.0482974	0.73459	0.0542805	0.0482974	0.73459
slr0835	1496	867.5	1043	520	1	slr0835	moxR	MoxR protein	moxR	MoxR	1496	867.5	628.5	678.5	0.0257706			1043	520	523	0.02533		0.982904			slr0835	moxR	MoxR	0.0268073	0.931354	0.0729027	0.0268073	0.931354
slr2104	1303	834.5	835	492	1	slr2104		sensory transduction histidine kinase	hik22	two-component hybrid histidine kinase	1303	834.5	468.5	518.5	0.0196935			835	492	343	0.0166122		0.843538			slr2104	hik22	two-component hybrid histidine kinase	0.0180725	0.878372	0.0492622	0.0180725	0.878372
slr0904	1302	838	857	496	1	slr0904		hypothetical protein	comM	competence protein ComM homolog	1302	838	464	514	0.0195226			857	496	361	0.017484		0.895578			slr0904	comM	competence protein ComM homolog	0.0208835	0.956654	0.0863739	0.0208835	0.956654
sll1599	1053	847.5	826	504	1	sll1599	mntA	Mn transporter MntA	mntA	ABC-type manganese transport system ATP-binding protein	1053	847.5	205.5	255.5	0.00970431			826	504	322	0.0155951		1.60703			sll1599	mntA	ABC-type manganese transport system ATP-binding protein	0.00911952	1.69576	0.125484	0.00911952	1.69576
slr0640	1208	849	852	489	1	slr0640		sensory transduction histidine kinase	hik27	two-component sensor histidine kinase Manganese sensor kinase	1208	849	359	409	0.0155345			852	489	363	0.0175809		1.13173			slr0640	hik27	two-component sensor histidine kinase Manganese sensor kinase	0.0156358	1.1531	0.0302193	0.0156358	1.1531
slr2057	3421	843	1642	499	1	slr2057	apqZ	water channel protein	apqZ	water channel protein	3421	843	2578	2628	0.0998158			1642	499	1143	0.0553579		0.554601			slr2057	apqZ	water channel protein	0.0935953	0.612918	0.0824734	0.0935953	0.612918
sll0672	1217	834	777	466	1	sll0672	pacL	cation-transporting ATPase PacL	pacL	cation-transporting p-type ATPase PacL	1217	834	383	433	0.0164461			777	466	311	0.0150624		0.915866			sll0672	pacL	cation-transporting p-type ATPase PacL	0.015995	0.95365	0.0534344	0.015995	0.95365
slr1280	5296	878	2737	491.5	1	slr1280	psbG	NADH-ubiquinone oxidoreductase subunit PsbG	ndhK, psbG1	NADH dehydrogenase I chain B	5296	878	4418	4468	0.169702			2737	491.5	2245.5	0.108754		0.640854			slr1280	ndhK, psbG1	NADH dehydrogenase I chain B	0.154818	0.711966	0.100567	0.154818	0.711966
sll0281	1193	905	685	474	1	sll0281				hypothetical protein	1193	905	288	338	0.0128378			685	474	211	0.0102192		0.796022			sll0281		hypothetical protein	0.0128489	0.881769	0.121264	0.0128489	0.881769
sll1867	6443	867	3285	489	1	sll1867	psbA3	photosystem II D1 protein	psbA3, psba-3	photosystem II D1 protein	6443	867	5576	5626	0.213685			3285	489	2796	0.135416		0.633719			sll1867	psbA3, psba-3	photosystem II D1 protein	0.194642	0.708332	0.105519	0.194642	0.708332
sll0099	1237	885	806	508	1	sll0099	cbiE or cobL	precorrin-6y methylase	cbiE, cbiT, cobL	precorrin-6y C5, 15-methyltransferase (decarboxylating)	1237	885	352	402	0.0152686			806	508	298	0.0144328		0.945256			sll0099	cbiE, cbiT, cobL	precorrin-6y C5, 15-methyltransferase (decarboxylating)	0.0145374	0.994283	0.0693343	0.0145374	0.994283
slr0813	1285	877	788	521	1	slr0813		ceramide glucosyltransferase		ceramide glucosyltransferase	1285	877	408	458	0.0173956			788	521	267	0.0129314		0.74337			slr0813		ceramide glucosyltransferase	0.0158326	0.80042	0.0806809	0.0158326	0.80042
sll0469	2150	854	1279	514.5	1	sll0469	prsA or prs	ribose-phosphate pyrophosphokinase	prsA, prs	ribose-phosphate pyrophosphokinase	2150	854	1296	1346	0.0511233			1279	514.5	764.5	0.0370263		0.724256			sll0469	prsA, prs	ribose-phosphate pyrophosphokinase	0.0476322	0.703652	0.0291375	0.0476322	0.703652
slr2124	1372	827.5	1035	547	1	slr2124		short-chain alcohol dehydrogenase family		short-chain alcohol dehydrogenase family	1372	827.5	544.5	594.5	0.0225801			1035	547	488	0.0236349		1.04671			slr2124		short-chain alcohol dehydrogenase family	0.0216495	0.991194	0.0785148	0.0216495	0.991194
slr0083	1793	870.5	1150	510	1	slr0083	deaD	ATP-dependent RNA helicase DeaD	crhR,deaD	ATP-dependent RNA helicase	1793	870.5	922.5	972.5	0.0369372			1150	510	640	0.0309965		0.83917			slr0083	crhR,deaD	ATP-dependent RNA helicase	0.0349974	0.840476	0.00184793	0.0349974	0.840476
slr1507	2638	831	1988	511	1	slr1507				hypothetical protein	2638	831	1807	1857	0.0705319			1988	511	1477	0.0715342		1.01421			slr1507		hypothetical protein	0.060735	0.932791	0.115144	0.060735	0.932791
sll0556	1305	861.5	833	521	1	sll0556				hypothetical protein	1305	861.5	443.5	493.5	0.018744			833	521	312	0.0151108		0.80617			sll0556		hypothetical protein	0.016362	0.880402	0.10498	0.016362	0.880402
sll0245	1550	829.5	1150	500	1	sll0245		hypothetical protein		hypothetical protein	1550	829.5	720.5	770.5	0.0292649			1150	500	650	0.0314809		1.07572			sll0245		hypothetical protein	0.0254746	1.0438	0.0451509	0.0254746	1.0438
sll0185	2526	855.5	3290	509.5	1	sll0185				hypothetical protein	2526	855.5	1670.5	1720.5	0.0653474			3290	509.5	2780.5	0.134665		2.06076			sll0185		hypothetical protein	0.0559994	1.93121	0.183213	0.0559994	1.93121
slr1998	1372	814	944	514	1	slr1998				hypothetical protein	1372	814	558	608	0.0230929			944	514	430	0.0208258		0.901829			slr1998		hypothetical protein	0.0203129	0.908067	0.00882146	0.0203129	0.908067
sll0679	1124	822.5	788	510	1	sll0679	sphX	SphX protein precursor	sphX	ABC-type phosphate transport system substrate-binding protein, PstS homolog	1124	822.5	301.5	351.5	0.0133506			788	510	278	0.0134641		1.00851			sll0679	sphX	ABC-type phosphate transport system substrate-binding protein, PstS homolog	0.0126901	1.01067	0.00306111	0.0126901	1.01067
sll0844	1589	813	1171	508.5	1	sll0844		hypothetical protein		probable tRNA-methyltransferase	1589	813	776	826	0.0313729			1171	508.5	662.5	0.0320863		1.02274			sll0844		probable tRNA-methyltransferase	0.0259397	1.0835	0.0859273	0.0259397	1.0835
sll0992	1466	822.5	1025	515.5	1	sll0992		esterase		esterase	1466	822.5	643.5	693.5	0.0263403			1025	515.5	509.5	0.0246762		0.936822			sll0992		esterase	0.0222938	0.838346	0.139267	0.0222938	0.838346
slr1567	1264	804	823	493.5	1	slr1567				hypothetical protein	1264	804	460	510	0.0193706			823	493.5	329.5	0.0159584		0.823843			slr1567		hypothetical protein	0.0160574	0.837285	0.01901	0.0160574	0.837285
slr2034	3861	822.5	3050	538	1	slr2034		hypothetical protein	ycf48	putative homolog of plant HCF136, which is essential for stability or assembly of photosystem II	3861	822.5	3038.5	3088.5	0.117306			3050	538	2512	0.121661		1.03713			slr2034	ycf48	putative homolog of plant HCF136, which is essential for stability or assembly of photosystem II	0.0910543	0.998573	0.0545221	0.0910543	0.998573
slr1451	1175	854	807	507	1	slr1451				hypothetical protein	1175	854	321	371	0.0140912			807	507	300	0.0145296		1.03111			slr1451		hypothetical protein	0.0114964	0.846147	0.261584	0.0114964	0.846147
slr1608	1341	827	865	444.5	1	slr1608	gdhB	glucose dehydrogenase-B	gdhB	putative glucose dehydrogenase-B, periplasmic protein	1341	827	514	564	0.0214217			865	444.5	420.5	0.0203657		0.950706			slr1608	gdhB	putative glucose dehydrogenase-B, periplasmic protein	0.02024	1.12414	0.245276	0.02024	1.12414
sll0506	1368	850	902	480.5	1	sll0506		hypothetical protein		undecaprenyl pyrophosphate synthetase	1368	850	518	568	0.0215736			902	480.5	421.5	0.0204141		0.946256			sll0506		undecaprenyl pyrophosphate synthetase	0.0210883	0.974293	0.0396503	0.0210883	0.974293
sll1017	1515	835	947	477	1	sll1017	amt1	ammonium transporter	amt2	ammonium/methylammonium permease	1515	835	680	730	0.0277266			947	477	470	0.0227631		0.820983			sll1017	amt2	ammonium/methylammonium permease	0.0278529	0.844117	0.0327158	0.0278529	0.844117
slr0040	1014	847	645	530	1	slr0040	nrtA	nitrate transport 45kD protein	cmpA	ABC-type bicarbonate transport system substrate-binding protein	1014	847	167	217	0.00824202			645	530	115	0.00556969		0.675768			slr0040	cmpA	ABC-type bicarbonate transport system substrate-binding protein	0.00773186	0.791844	0.164156	0.00773186	0.791844
slr0965	1631	866.5	1245	498.5	1	slr0965	dnaN	DNA polymerase III beta subunit	dnaN	DNA polymerase III beta subunit	1631	866.5	764.5	814.5	0.0309361			1245	498.5	746.5	0.0361546		1.16869			slr0965	dnaN	DNA polymerase III beta subunit	0.0339857	1.08688	0.115686	0.0339857	1.08688
slr0795	980	853	617	524	1	slr0795			nrsC	Cation efflux system protein involved in nickel and cobalt tolerance	980	853	127	177	0.00672275			617	524	93	0.00450419		0.669991			slr0795	nrsC	Cation efflux system protein involved in nickel and cobalt tolerance	0.00703015	0.695595	0.0362098	0.00703015	0.695595
slr1787	1148	850	724.5	483	1	slr1787		hypothetical protein		putative thiamine-monophosphate kinase	1148	850	298	348	0.0132176			724.5	483	241.5	0.0116964		0.884906			slr1787		putative thiamine-monophosphate kinase	0.0139077	0.909292	0.034487	0.0139077	0.909292
slr0119	1132.5	875	671.5	465	1	slr0119	brkB	serum resistance locus BrkB	brkB	serum resistance locus BrkB	1132.5	875	257.5	307.5	0.0116794			671.5	465	206.5	0.0100012		0.856317			slr0119	brkB	serum resistance locus BrkB	0.010165	0.839958	0.0231342	0.010165	0.839958
sll1040	1214	846.5	822	506.5	1	sll1040				hypothetical protein	1214	846.5	367.5	417.5	0.0158573			822	506.5	315.5	0.0152803		0.963612			sll1040		hypothetical protein	0.0155655	1.02094	0.0810785	0.0155655	1.02094
slr0522	1080	837.5	704.5	488.5	1	slr0522				hypothetical protein	1080	837.5	242.5	292.5	0.0111096			704.5	488.5	216	0.0104613		0.941645			slr0522		hypothetical protein	0.0104787	1.00557	0.0903972	0.0104787	1.00557
sll0224	1833	884	1301	481	1	sll0224				putative polar amino acid transport system substrate-binding protein	1833	884	949	999	0.0379437			1301	481	820	0.0397143		1.04667			sll0224		putative polar amino acid transport system substrate-binding protein	0.0354427	1.09067	0.0622383	0.0354427	1.09067
slr0076	2024	822.5	1780	505	1	slr0076		hypothetical protein		hypothetical protein	2024	822.5	1201.5	1251.5	0.0475341			1780	505	1275	0.0617509		1.29909			slr0076		hypothetical protein	0.0419082	1.45849	0.225426	0.0419082	1.45849
sll1932	1971	897	1199	476	1	sll1932	dnaK	DnaK protein	dnaK3, dnaK	DnaK protein 3, heat shock protein 70, molecular chaperone	1971	897	1074	1124	0.0426914			1199	476	723	0.0350164		0.820222			sll1932	dnaK3, dnaK	DnaK protein 3, heat shock protein 70, molecular chaperone	0.0415819	0.898038	0.110049	0.0415819	0.898038
sll0626	1772.5	843	978	500	1	sll0626	lim17	LIM17 protein	lim17	LIM17	1772.5	843	929.5	979.5	0.037203			978	500	478	0.0231505		0.622276			sll0626	lim17	LIM17	0.0317512	0.747432	0.176998	0.0317512	0.747432
slr1755	1548	864.5	981	490	1	slr1755	gpsA	NAD+ dependent glycerol-3-phosphate dehydrogenase	gpsA	glycerol-3-phosphate dehydrogenase (NAD(P)+)	1548	864.5	683.5	733.5	0.0278595			981	490	491	0.0237802		0.853573			slr1755	gpsA	glycerol-3-phosphate dehydrogenase (NAD(P)+)	0.0267608	0.94282	0.126214	0.0267608	0.94282
sll0533	2542	816	2783	519.5	1	sll0533	tig	trigger factor	tig	trigger factor	2542	816	1726	1776	0.0674554			2783	519.5	2263.5	0.109626		1.62516			sll0533	tig	trigger factor	0.0605194	1.71683	0.129633	0.0605194	1.71683
sll0634	1492	817	1123	540.5	1	sll0634		hypothetical protein	btpA	photosystem I biogenesis protein BtpA	1492	817	675	725	0.0275367			1123	540.5	582.5	0.0282117		1.02451			sll0634	btpA	photosystem I biogenesis protein BtpA	0.024485	1.06025	0.0505367	0.024485	1.06025
slr0531	1373	861.5	928	534	1	slr0531		membrane bound sugar transport protein	ggtD	ABC-type glucosylglycerol transport system permease protein	1373	861.5	511.5	561.5	0.0213267			928	534	394	0.0190823		0.894759			slr0531	ggtD	ABC-type glucosylglycerol transport system permease protein	0.0193526	0.921964	0.0384739	0.0193526	0.921964
slr0984	1564	846.5	941	534	1	slr0984	rfbG	CDP-glucose 4,6-dehydratase	rfbG	CDP-glucose 4,6-dehydratase	1564	846.5	717.5	767.5	0.0291509			941	534	407	0.0197119		0.6762			slr0984	rfbG	CDP-glucose 4,6-dehydratase	0.0255818	0.713358	0.0525495	0.0255818	0.713358
sll0778	1087	832	711.5	532	1	sll0778		ABC transporter		putative MDR (multidrug resistance) family ABC transporter	1087	832	255	305	0.0115844			711.5	532	179.5	0.00869356		0.750454			sll0778		putative MDR (multidrug resistance) family ABC transporter	0.0104554	0.747499	0.004179	0.0104554	0.747499
slr1302	2262	830	1742	517	1	slr1302			cupB	Involved in constitutive low-affinity CO2 uptake	2262	830	1432	1482	0.0562888			1742	517	1225	0.0593293		1.05402			slr1302	cupB	Involved in constitutive low-affinity CO2 uptake	0.0485351	0.987186	0.0945123	0.0485351	0.987186
slr0304	1445	838.5	958	506	1	slr0304				hypothetical protein	1445	838.5	606.5	656.5	0.024935			958	506	452	0.0218913		0.877937			slr0304		hypothetical protein	0.0214753	0.781422	0.136493	0.0214753	0.781422
slr1106	1795	853.5	1110	510.5	1	slr1106	phb	prohibitin	phb	prohibitin	1795	853.5	941.5	991.5	0.0376588			1110	510.5	599.5	0.029035		0.771003			slr1106	phb	prohibitin	0.0331376	0.793234	0.0314397	0.0331376	0.793234
slr0618	1699	858.5	1303	516.5	1	slr0618	cbiP or cobQ	cobyric acid synthase	cbiP, cobQ	cobyric acid synthase	1699	858.5	840.5	890.5	0.0338227			1303	516.5	786.5	0.0380919		1.12622			slr0618	cbiP, cobQ	cobyric acid synthase	0.0306886	1.04979	0.108085	0.0306886	1.04979
sll1327	6439	806.5	4370	507	1	sll1327	atpC	ATP synthase g subunit	atpC, atpG	ATP synthase gamma chain	6439	806.5	5632.5	5682.5	0.215831			4370	507	3863	0.187093		0.866851			sll1327	atpC, atpG	ATP synthase gamma chain	0.180557	0.878512	0.0164904	0.180557	0.878512
slr0090	1053	792	746	517	1	slr0090	ppd	4-hydroxyphenylpyruvic acid dioxgenase (HPD)	ppd	4-hydroxyphenylpyruvate dioxygenase	1053	792	261	311	0.0118123			746	517	229	0.011091		0.938933			slr0090	ppd	4-hydroxyphenylpyruvate dioxygenase	0.0112935	0.88394	0.0777713	0.0112935	0.88394
slr0721	1458	802	1026	482.5	1	slr0721	me	malic enzyme	me	malic enzyme	1458	802	656	706	0.0268151			1026	482.5	543.5	0.0263229		0.981645			slr0721	me	malic enzyme	0.0240277	0.888234	0.132103	0.0240277	0.888234
slr0841	1801	836.5	1441	491.5	1	slr0841				periplasmic protein, function unknown	1801	836.5	964.5	1014.5	0.0385324			1441	491.5	949.5	0.0459863		1.19344			slr0841		periplasmic protein, function unknown	0.0310546	1.16168	0.044916	0.0310546	1.16168
slr0293	1304	804	848	493.5	1	slr0293	gcvP	P protein of glycine cleavage complex	gcvP	glycine dehydrogenase	1304	804	500	550	0.0208899			848	493.5	354.5	0.0171692		0.821889			slr0293	gcvP	glycine dehydrogenase	0.0167205	0.808917	0.0183453	0.0167205	0.808917
sll1830	1843	827.5	1185	487	1	sll1830				hypothetical protein	1843	827.5	1015.5	1065.5	0.0404695			1185	487	698	0.0338056		0.835336			sll1830		hypothetical protein	0.0308163	0.875078	0.0562038	0.0308163	0.875078
slr0959	1254	896	1001	465	1	slr0959				hypothetical protein	1254	896	358	408	0.0154965			1001	465	536	0.0259596		1.67519			slr0959		hypothetical protein	0.0144486	1.77956	0.147601	0.0144486	1.77956
sll1002	1230	856	768.5	491	1	sll1002	ycf22	hypothetical protein	ycf22	ABC transporter substrate-binding protein	1230	856	374	424	0.0161042			768.5	491	277.5	0.0134399		0.834558			sll1002	ycf22	ABC transporter substrate-binding protein	0.0151	0.986817	0.215327	0.0151	0.986817
sll1563	1110	844	773	495	1	sll1563				hypothetical protein	1110	844	266	316	0.0120022			773	495	278	0.0134641		1.1218			sll1563		hypothetical protein	0.0126049	1.06125	0.0856417	0.0126049	1.06125
slr1595	1109	831	721	518	1	slr1595		Na/H antiporter	nhaS4	Na/H antiporter	1109	831	278	328	0.012458			721	518	203	0.00983172		0.78919			slr1595	nhaS4	Na/H antiporter	0.0132093	0.85778	0.097001	0.0132093	0.85778
sll1377	2211	831.5	1812	518.5	1	sll1377				hypothetical protein	2211	831.5	1379.5	1429.5	0.0542948			1812	518.5	1293.5	0.0626469		1.15383			sll1377		hypothetical protein	0.0507434	1.26312	0.154561	0.0507434	1.26312
slr1400	1592	867	1102	520	1	slr1400		regulatory components of sensory transduction system	hik38	two-component hybrid histidine kinase	1592	867	725	775	0.0294358			1102	520	582	0.0281875		0.957592			slr1400	hik38	two-component hybrid histidine kinase	0.0293061	0.972929	0.0216895	0.0293061	0.972929
slr1350	4696	828.5	4252	495	1	slr1350	desA	fatty acid desaturase	desA	acyl-lipid desaturase (delta 12)	4696	828.5	3867.5	3917.5	0.148793			4252	495	3757	0.181959		1.2229			slr1350	desA	acyl-lipid desaturase (delta 12)	0.131929	1.36255	0.197492	0.131929	1.36255
slr0982	1868	882.5	1097	499	1	slr0982	rfbB	ABC transporter	rfbB	putative O-antigen export system ATP-binding protein, ABC-2 type transporter ATP-binding protein	1868	882.5	985.5	1035.5	0.03933			1097	499	598	0.0289624		0.736394			slr0982	rfbB	putative O-antigen export system ATP-binding protein, ABC-2 type transporter ATP-binding protein	0.03602	0.780145	0.0618728	0.03602	0.780145
slr0809	1827	844	1420	517.5	1	slr0809	rfbB	dTDP-glucose 4-6-dehydratase	rfbB	dTDP-glucose 4-6-dehydratase	1827	844	983	1033	0.0392351			1420	517.5	902.5	0.04371		1.11405			slr0809	rfbB	dTDP-glucose 4-6-dehydratase	0.0382124	1.05818	0.0790248	0.0382124	1.05818
slr1789	1066.5	830.5	692.5	497.5	1	slr1789				hypothetical protein	1066.5	830.5	236	286	0.0108628			692.5	497.5	195	0.00944426		0.869417			slr1789		hypothetical protein	0.0103263	0.90274	0.0471268	0.0103263	0.90274
sll1428	1073.5	821	668.5	479.5	1	sll1428		P3 protein		P3 protein	1073.5	821	252.5	302.5	0.0114895			668.5	479.5	189	0.00915367		0.796702			sll1428		P3 protein	0.0104176	0.885862	0.126092	0.0104176	0.885862
sll0696	1381	825	1098	483	1	sll0696				hypothetical protein	1381	825	556	606	0.0230169			1098	483	615	0.0297857		1.29408			sll0696		hypothetical protein	0.0213755	1.23502	0.0835224	0.0213755	1.23502
sll1612	1545	866.5	932	464	1	sll1612	folC or dedC	folyl-polyglutamate synthetase	folC, dedC	folylpolyglutamate synthase / dihydrofolate synthase	1545	866.5	678.5	728.5	0.0276696			932	464	468	0.0226662		0.819173			sll1612	folC, dedC	folylpolyglutamate synthase / dihydrofolate synthase	0.0270714	0.935164	0.164035	0.0270714	0.935164
sll1393	2079	842	1325	504.5	1	sll1393	glgA	glycogen (starch) synthase	glgA	glycogen (starch) synthase	2079	842	1237	1287	0.0488824			1325	504.5	820.5	0.0397385		0.812942			sll1393	glgA	glycogen (starch) synthase	0.0445615	0.891435	0.111006	0.0445615	0.891435
sll0267	1304	876	812	507	1	sll0267		hypothetical protein		hypothetical protein	1304	876	428	478	0.0181552			812	507	305	0.0147718		0.813638			sll0267		hypothetical protein	0.0176124	0.824209	0.0149494	0.0176124	0.824209
sll1946	1257	887	987	483.5	1	sll1946				hypothetical protein	1257	887	370	420	0.0159523			987	483.5	503.5	0.0243856		1.52866			sll1946		hypothetical protein	0.0156516	1.43444	0.133243	0.0156516	1.43444
slr0937	1830	835.5	1215	523	1	slr0937				hypothetical protein	1830	835.5	994.5	1044.5	0.0396718			1215	523	692	0.033515		0.844806			slr0937		hypothetical protein	0.0359689	0.81522	0.0418411	0.0359689	0.81522
sll1011	2043	859.5	1239	504.5	1	sll1011		hypothetical protein		hypothetical protein	2043	859.5	1183.5	1233.5	0.0468504			1239	504.5	734.5	0.0355734		0.759298			sll1011		hypothetical protein	0.0405043	0.820608	0.0867056	0.0405043	0.820608
sll1173	1167	896	729	522	1	sll1173				hypothetical protein	1167	896	271	321	0.0121921			729	522	207	0.0100254		0.822289			sll1173		hypothetical protein	0.0113772	0.884055	0.0873498	0.0113772	0.884055
sll0641	1374	884	885	491	1	sll0641				hypothetical protein	1374	884	490	540	0.0205101			885	491	394	0.0190823		0.930383			sll0641		hypothetical protein	0.0185967	0.949493	0.0270254	0.0185967	0.949493
slr1959	1122.5	838	750	516	1	slr1959				hypothetical protein	1122.5	838	284.5	334.5	0.0127049			750	516	234	0.0113331		0.892029			slr1959		hypothetical protein	0.0123094	0.893439	0.00199422	0.0123094	0.893439
slr1065	1434	847.5	1191	553	1	slr1065				hypothetical protein	1434	847.5	586.5	636.5	0.0241753			1191	553	638	0.0308997		1.27815			slr1065		hypothetical protein	0.0210086	1.18018	0.138544	0.0210086	1.18018
slr0818	1365	859.5	939	521.5	1	slr0818				hypothetical protein	1365	859.5	505.5	555.5	0.0210988			939	521.5	417.5	0.0202204		0.958367			slr0818		hypothetical protein	0.0194124	0.949559	0.0124559	0.0194124	0.949559
sll1665	3266	828	1886	513	1	sll1665				hypothetical protein	3266	828	2438	2488	0.0944984			1886	513	1373	0.0664973		0.703687			sll1665		hypothetical protein	0.0775069	0.739805	0.0510788	0.0775069	0.739805
slr2125	1200	829.5	941	512	1	slr2125				hypothetical protein	1200	829.5	370.5	420.5	0.0159713			941	512	429	0.0207774		1.30092			slr2125		hypothetical protein	0.0145219	1.23793	0.0890858	0.0145219	1.23793
slr1096	2892	804.5	1993	527.5	1	slr1096	phdD or lpd	dihydrolipoamide dehydrogenase	phdD, lpd	dihydrolipoamide dehydrogenase	2892	804.5	2087.5	2137.5	0.0811858			1993	527.5	1465.5	0.0709773		0.874257			slr1096	phdD, lpd	dihydrolipoamide dehydrogenase	0.0659557	0.835845	0.0543229	0.0659557	0.835845
sll0249	2902	830.5	723	523	1	sll0249		hypothetical protein		hypothetical protein	2902	830.5	2071.5	2121.5	0.0805781			723	523	200	0.00968642		0.120212			sll0249		hypothetical protein	0.0677276	0.159124	0.0550299	0.0677276	0.159124
sll1049	1380	781.5	844	485.5	1	sll1049				hypothetical protein	1380	781.5	598.5	648.5	0.0246311			844	485.5	358.5	0.0173629		0.704918			sll1049		hypothetical protein	0.0210917	0.740721	0.0506335	0.0210917	0.740721
slr1257	1161	837	789	485.5	1	slr1257				hypothetical protein	1161	837	324	374	0.0142051			789	485.5	303.5	0.0146991		1.03478			slr1257		hypothetical protein	0.0127892	0.955442	0.112196	0.0127892	0.955442
sll1408	1881	799	786	487.5	1	sll1408	pcrR	regulatory protein PcrR	pcrR	regulatory protein PcrR.	1881	799	1082	1132	0.0429952			786	487.5	298.5	0.014457		0.336246			sll1408	pcrR	regulatory protein PcrR.	0.0327936	0.408072	0.101577	0.0327936	0.408072
slr0022	1069	799	760	536.5	1	slr0022				hypothetical protein	1069	799	270	320	0.0121541			760	536.5	223.5	0.0108246		0.890609			slr0022		hypothetical protein	0.0129029	0.822536	0.0962687	0.0129029	0.822536
slr0078	1291	819	901	481	1	slr0078		hypothetical protein		6-pyruvoyl tetrahydrobiopterin synthase	1291	819	472	522	0.0198264			901	481	420	0.0203415		1.02598			slr0078		6-pyruvoyl tetrahydrobiopterin synthase	0.0184286	0.89798	0.181017	0.0184286	0.89798
slr1623	2311	814.5	1462	476.5	1	slr1623				hypothetical protein	2311	814.5	1496.5	1546.5	0.0587386			1462	476.5	985.5	0.0477298		0.81258			slr1623		hypothetical protein	0.0491035	0.811795	0.00111047	0.0491035	0.811795
slr2008	1384	818.5	1019	515	1	slr2008				hypothetical protein	1384	818.5	565.5	615.5	0.0233777			1019	515	504	0.0244098		1.04415			slr2008		hypothetical protein	0.0190071	1.06352	0.027395	0.0190071	1.06352
slr0038	1765	823.5	1215	502.5	1	slr0038				hypothetical protein	1765	823.5	941.5	991.5	0.0376588			1215	502.5	712.5	0.0345079		0.916329			slr0038		hypothetical protein	0.0369609	0.927987	0.0164862	0.0369609	0.927987
slr0628	6788	770	5815	479	1	slr0628	rps14	30S ribosomal protein S14	rpsN, rps14	30S ribosomal protein S14	6788	770	6018	6068	0.230473			5815	479	5336	0.258434		1.12132			slr0628	rpsN, rps14	30S ribosomal protein S14	0.229084	1.12524	0.00554639	0.229084	1.12524
slr0870	1023.5	787.5	640	494.5	1	slr0870				hypothetical protein	1023.5	787.5	236	286	0.0108628			640	494.5	145.5	0.00704687		0.648719			slr0870		hypothetical protein	0.00971805	0.670617	0.0309697	0.00971805	0.670617
slr1896	1216	784	1014	506	1	slr1896		hypothetical protein		hypothetical protein	1216	784	432	482	0.0183072			1014	506	508	0.0246035		1.34393			slr1896		hypothetical protein	0.016607	1.29537	0.0686728	0.016607	1.29537
sll1292	1432	840	815	503.5	1	sll1292		regulatory components of sensory transduction system	rre11	two-component response regulator (CheY subfamily)	1432	840	592	642	0.0243842			815	503.5	311.5	0.0150866		0.618703			sll1292	rre11	two-component response regulator (CheY subfamily)	0.0228123	0.69461	0.107348	0.0228123	0.69461
slr0145	2929	826.5	1496	499	1	slr0145				hypothetical protein	2929	826.5	2102.5	2152.5	0.0817555			1496	499	997	0.0482868		0.590624			slr0145		hypothetical protein	0.0727189	0.556158	0.0487435	0.0727189	0.556158
slr0270	1398	829.5	1147	518	1	slr0270				hypothetical protein	1398	829.5	568.5	618.5	0.0234917			1147	518	629	0.0304638		1.29679			slr0270		hypothetical protein	0.0220763	1.20813	0.125391	0.0220763	1.20813
slr0520	1326	873.5	849	511.5	1	slr0520	purL or purI	phosphoribosyl formylglycinamidine synthase	purL, purI	phosphoribosyl formylglycinamidine synthase	1326	873.5	452.5	502.5	0.0190858			849	511.5	337.5	0.0163458		0.85644			slr0520	purL, purI	phosphoribosyl formylglycinamidine synthase	0.0178942	0.871006	0.0205989	0.0178942	0.871006
sml0004	1171	824	822	496	1	sml0004	ycf6	hypothetical protein	petN	cytochrome b6-f complex subunit VIII	1171	824	347	397	0.0150787			822	496	326	0.0157889		1.0471			sml0004	petN	cytochrome b6-f complex subunit VIII	0.0157169	0.882621	0.232602	0.0157169	0.882621
sll0749	2210	803.5	1642	521.5	1	sll0749				hypothetical protein	2210	803.5	1406.5	1456.5	0.0553203			1642	521.5	1120.5	0.0542682		0.980981			sll0749		hypothetical protein	0.0489487	1.0128	0.0450052	0.0489487	1.0128
ssr3571	1056	777.5	741	500	1	ssr3571				hypothetical protein	1056	777.5	278.5	328.5	0.012477			741	500	241	0.0116721		0.935494			ssr3571		hypothetical protein	0.0123016	1.00526	0.0986603	0.0123016	1.00526
sll0588	3767	818	1477	517	1	sll0588				hypothetical protein	3767	818	2949	2999	0.113907			1477	517	960	0.0464948		0.408182			sll0588		hypothetical protein	0.0967887	0.408054	0.00018105	0.0967887	0.408054
sll1338	13954	813	4881	508.5	1	sll1338				hypothetical protein	13954	813	13141	13191	0.501016			4881	508.5	4372.5	0.211769		0.42268			sll1338		hypothetical protein	0.432402	0.402928	0.0279336	0.432402	0.402928
sll0669	1057	808	741	490	1	sll0669				hypothetical protein	1057	808	249	299	0.0113565			741	490	251	0.0121565		1.07044			sll0669		hypothetical protein	0.012031	1.0726	0.0030614	0.012031	1.0726
slr0488	1129	812	771	484	1	slr0488				virulence factor MviN homolog	1129	812	317	367	0.0139393			771	484	287	0.0139		0.997184			slr0488		virulence factor MviN homolog	0.0131679	1.01189	0.0207933	0.0131679	1.01189
ssl0563	1448	778.5	855	477	1	ssl0563	psaC	photosystem I subunit VII	psaC	photosystem I iron-sulfur center subunit VII	1448	778.5	669.5	719.5	0.0273278			855	477	378	0.0183073		0.669916			ssl0563	psaC	photosystem I iron-sulfur center subunit VII	0.0291693	0.593839	0.107589	0.0291693	0.593839
sll0846	1076	786	1405	494	1	sll0846				hypothetical protein	1076	786	290	340	0.0129138			1405	494	911	0.0441216		3.41664			sll0846		hypothetical protein	0.0121918	3.20272	0.302527	0.0121918	3.20272
slr2076	8179	794.5	22493	482.5	1	slr2076	groEL	60kD chaperonin 1	groEL1, cpn60-1	60 kDa chaperonin 1, GroEL1, molecular chaperone	8179	794.5	7384.5	7434.5	0.282375			22493	482.5	22010.5	1.06601		3.77518			slr2076	groEL1, cpn60-1	60 kDa chaperonin 1, GroEL1, molecular chaperone	0.246558	3.6866	0.125266	0.246558	3.6866
smr0006	1654	823	1099	444	1	smr0006	psbF	cytochrome b559 b subunit	psbF	cytochrome b559 beta chain	1654	823	831	881	0.0334618			1099	444	655	0.031723		0.948036			smr0006	psbF	cytochrome b559 beta chain	0.0352486	0.960528	0.0176667	0.0352486	0.960528
slr0816	1174	845.5	735	449	1	slr0816				hypothetical protein	1174	845.5	328.5	378.5	0.0143761			735	449	286	0.0138516		0.963517			slr0816		hypothetical protein	0.0140718	0.98144	0.025346	0.0140718	0.98144
ssl2559	1037	801	637	469	1	ssl2559				2Fe-2S type iron-sulfur protin	1037	801	236	286	0.0108628			637	469	168	0.00813659		0.749036			ssl2559		2Fe-2S type iron-sulfur protin	0.0111469	0.844225	0.134617	0.0111469	0.844225
sll0372	1430	826.5	1009	467.5	1	sll0372				hypothetical protein	1430	826.5	603.5	653.5	0.024821			1009	467.5	541.5	0.026226		1.0566			sll0372		hypothetical protein	0.0264098	0.999429	0.0808576	0.0264098	0.999429
slr0729	1657	778	1070	479	1	slr0729				hypothetical protein	1657	778	879	929	0.035285			1070	479	591	0.0286234		0.811206			slr0729		hypothetical protein	0.0313425	0.990655	0.253779	0.0313425	0.990655
slr1636	1140	839.5	716	473	1	slr1636				hypothetical protein	1140	839.5	300.5	350.5	0.0133126			716	473	243	0.011769		0.884052			slr1636		hypothetical protein	0.0138587	0.85061	0.0472941	0.0138587	0.85061
ssr2802	1030	859	699	471	1	ssr2802		ABC transporter		hypothetical protein	1030	859	171	221	0.00839395			699	471	228	0.0110425		1.31553			ssr2802		hypothetical protein	0.00980634	1.14442	0.241992	0.00980634	1.14442
slr1730	1125	811	738	503	1	slr1730	kdpC	potassium-transporting ATPase C chain	kdpC	potassium-transporting ATPase C chain	1125	811	314	364	0.0138253			738	503	235	0.0113815		0.823239			slr1730	kdpC	potassium-transporting ATPase C chain	0.0137675	0.889876	0.0942385	0.0137675	0.889876
sll1816	4750	819.5	3880	495	1	sll1816	rps13	30S ribosomal protein S13	rpsM, rps13	30S ribosomal protein S13	4750	819.5	3930.5	3980.5	0.151186			3880	495	3385	0.163943		1.08438			sll1816	rpsM, rps13	30S ribosomal protein S13	0.152937	1.0883	0.00554193	0.152937	1.0883
slr1251	1150	774.5	978	480.5	1	slr1251	cyp or rot1	peptidyl-prolyl cis-trans isomerase	cyp, rot1	peptidyl-prolyl cis-trans isomerase	1150	774.5	375.5	425.5	0.0161612			978	480.5	497.5	0.024095		1.49092			slr1251	cyp, rot1	peptidyl-prolyl cis-trans isomerase	0.0163547	1.42247	0.0968017	0.0163547	1.42247
sll0199	2280	765	1549	484	1	sll0199	petE	plastocyanin	petE	plastocyanin	2280	765	1515	1565	0.0594413			1549	484	1065	0.0515802		0.86775			sll0199	petE	plastocyanin	0.0599301	0.856209	0.0163212	0.0599301	0.856209
slr1103	1811	832	1122	491	1	slr1103		hypothetical protein		hypothetical protein	1811	832	979	1029	0.0390831			1122	491	631	0.0305607		0.78194			slr1103		hypothetical protein	0.0373351	0.776142	0.00820002	0.0373351	0.776142
ssl0467	1246	764	801	490	1	ssl0467				hypothetical protein	1246	764	482	532	0.0202062			801	490	311	0.0150624		0.745432			ssl0467		hypothetical protein	0.0187054	0.859596	0.161452	0.0187054	0.859596
sll0142	1165	788	800	487	1	sll0142		cation efflux system protein CzcA		cation efflux system protein CzcA	1165	788	377	427	0.0162182			800	487	313	0.0151592		0.934708			sll0142		cation efflux system protein CzcA	0.0149446	0.881818	0.0747981	0.0149446	0.881818
ssr2422	1136	828.5	740	476	1	ssr2422				hypothetical protein	1136	828.5	307.5	357.5	0.0135784			740	476	264	0.0127861		0.941645			ssr2422		hypothetical protein	0.0126593	0.987536	0.0648989	0.0126593	0.987536
sll0188	2603	829.5	1813	487.5	1	sll0188				hypothetical protein	2603	829.5	1773.5	1823.5	0.0692596			1813	487.5	1325.5	0.0641968		0.926901			sll0188		hypothetical protein	0.0614312	0.841007	0.121473	0.0614312	0.841007
slr0064	1183	803.5	883	523.5	1	slr0064		hypothetical protein		hypothetical protein	1183	803.5	379.5	429.5	0.0163131			883	523.5	359.5	0.0174113		1.06732			slr0064		hypothetical protein	0.0160541	0.934064	0.188454	0.0160541	0.934064
sll1057	1216	857	818	518	1	sll1057	trx	thioredoxin M	trx	thioredoxin M	1216	857	359	409	0.0155345			818	518	300	0.0145296		0.935314			sll1057	trx	thioredoxin M	0.0163116	0.862672	0.102731	0.0163116	0.862672
slr1442	1341	837.5	934	487	1	slr1442				hypothetical protein	1341	837.5	503.5	553.5	0.0210228			934	487	447	0.0216492		1.02979			slr1442		hypothetical protein	0.0206102	0.917487	0.158823	0.0206102	0.917487
ssr0330	1095	809.5	814	491.5	1	ssr0330	ftrV	ferredoxin-thioredoxin reductase, variable chain	ftrV	ferredoxin-thioredoxin reductase, variable chain	1095	809.5	285.5	335.5	0.0127428			814	491.5	322.5	0.0156194		1.22574			ssr0330	ftrV	ferredoxin-thioredoxin reductase, variable chain	0.0134193	1.07436	0.214079	0.0134193	1.07436
sll1614	1110	795.5	774	508	1	sll1614	pma1	H(+)-transporting ATPase	pma1	cation-transporting P-type ATPase	1110	795.5	314.5	364.5	0.0138443			774	508	266	0.0128829		0.930558			sll1614	pma1	cation-transporting P-type ATPase	0.0135839	0.934148	0.0050768	0.0135839	0.934148
ssl3549	1406	812	1085	491	1	ssl3549				hypothetical protein	1406	812	594	644	0.0244602			1085	491	594	0.0287687		1.17614			ssl3549		hypothetical protein	0.0227633	1.1597	0.023257	0.0227633	1.1597
slr0377	1639	828	959	526.5	1	slr0377				hypothetical protein	1639	828	811	861	0.0327022			959	526.5	432.5	0.0209469		0.640534			slr0377		hypothetical protein	0.0297421	0.642674	0.00302661	0.0297421	0.642674
ssr2062	1255	810.5	819	485.5	1	ssr2062				hypothetical protein	1255	810.5	444.5	494.5	0.0187819			819	485.5	333.5	0.0161521		0.859981			ssr2062		hypothetical protein	0.0179257	0.749082	0.156835	0.0179257	0.749082
sll1716	1417	816.5	1186	469	1	sll1716		transposase	ISY523a	putative transposase gene of IS5 family insertion sequence IS523a	1417	816.5	600.5	650.5	0.0247071			1186	469	717	0.0347258		1.4055			sll1716	ISY523a	putative transposase gene of IS5 family insertion sequence IS523a	0.0222496	1.30597	0.140763	0.0222496	1.30597
ssr1155	1480	797.5	879	498	1	ssr1155				hypothetical protein	1480	797.5	682.5	732.5	0.0278216			879	498	381	0.0184526		0.663249			ssr1155		hypothetical protein	0.0233627	0.741968	0.111324	0.0233627	0.741968
sll1452	5421	794.5	2022	486	1	sll1452	nrtC	nitrate transport protein NrtC	nrtC	ABC-type nitrate/nitrite transport system ATP-binding protein	5421	794.5	4626.5	4676.5	0.177621			2022	486	1536	0.0743917		0.418822			sll1452	nrtC	ABC-type nitrate/nitrite transport system ATP-binding protein	0.141844	0.441104	0.0315111	0.141844	0.441104
slr0602	1252	793.5	867	530.5	1	slr0602				hypothetical protein	1252	793.5	458.5	508.5	0.0193137			867	530.5	336.5	0.0162974		0.843827			slr0602		hypothetical protein	0.0171199	0.906157	0.0881476	0.0171199	0.906157
slr1661	1244	767	804	485.5	1	slr1661				hypothetical protein	1244	767	477	527	0.0200163			804	485.5	318.5	0.0154256		0.770652			slr1661		hypothetical protein	0.0171623	0.860713	0.127366	0.0171623	0.860713
slr0923	1995	764.5	1814	479.5	1	slr0923		hypothetical protein	ycf65	ycf65-like protein	1995	764.5	1230.5	1280.5	0.0486355			1814	479.5	1334.5	0.0646326		1.32892			slr0923	ycf65	ycf65-like protein	0.0399197	1.33578	0.00970844	0.0399197	1.33578
slr0348	1801	814	1247	451.5	1	slr0348		hypothetical protein		LytB protein homolog	1801	814	987	1037	0.039387			1247	451.5	795.5	0.0385277		0.978185			slr0348		LytB protein homolog	0.0426813	0.985431	0.0102478	0.0426813	0.985431
slr0333	1183	822.5	790	463.5	1	slr0333				hypothetical protein	1183	822.5	360.5	410.5	0.0155915			790	463.5	326.5	0.0158131		1.01421			slr0333		hypothetical protein	0.0163884	1.04485	0.0433321	0.0163884	1.04485
slr0633	1562	802	1068	465.5	1	slr0633	thiG	ThiG protein	thiG	ThiG protein	1562	802	760	810	0.0307651			1068	465.5	602.5	0.0291803		0.948487			slr0633	thiG	ThiG protein	0.0313997	0.954513	0.008522	0.0313997	0.954513
ssr1169	1032	783	702	462	1	ssr1169	ESI3	salt-stress induced hydrophobic peptide	ESI3	salt-stress induced hydrophobic peptide	1032	783	249	299	0.0113565			702	462	240	0.0116237		1.02353			ssr1169	ESI3	salt-stress induced hydrophobic peptide	0.0117607	0.861893	0.228585	0.0117607	0.861893
slr1827	1141	817.5	793	463	1	slr1827				hypothetical protein	1141	817.5	323.5	373.5	0.0141862			793	463	330	0.0159826		1.12663			slr1827		hypothetical protein	0.0145079	1.12556	0.00151426	0.0145079	1.12556
ssl1426	2361	838	2330	467	1	ssl1426	rpl35	50S ribosomal protein L35	rpmI, rpl35	50S ribosomal protein L35	2361	838	1523	1573	0.0597452			2330	467	1863	0.090229		1.51023			ssl1426	rpmI, rpl35	50S ribosomal protein L35	0.0612503	1.69236	0.257563	0.0612503	1.69236
slr0331	2131	803	1342	485.5	1	slr0331	ndhD	NADH dehydrogenase subunit 4	ndhD1	NADH dehydrogenase I chain M, involved in photosystem-1 cyclic electron flow	2131	803	1328	1378	0.0523387			1342	485.5	856.5	0.0414821		0.79257			slr0331	ndhD1	NADH dehydrogenase I chain M, involved in photosystem-1 cyclic electron flow	0.0545638	0.783115	0.0133719	0.0545638	0.783115
ssr2194	1020	771	1722	522	1	ssr2194				hypothetical protein	1020	771	249	299	0.0113565			1722	522	1200	0.0581185		5.11764			ssr2194		hypothetical protein	0.0119441	5.15632	0.0547039	0.0119441	5.15632
sll0861	1535	806	1110	495.5	1	sll0861		hypothetical protein		hypothetical protein	1535	806	729	779	0.0295877			1110	495.5	614.5	0.0297615		1.00587			sll0861		hypothetical protein	0.0297393	1.01117	0.00748563	0.0297393	1.01117
ssr2848	1654	763.5	826	482	1	ssr2848				hypothetical protein	1654	763.5	890.5	940.5	0.0357218			826	482	344	0.0166606		0.466401			ssr2848		hypothetical protein	0.0348531	0.479304	0.0182477	0.0348531	0.479304
slr1275	2378	817.5	1286	493.5	1	slr1275			pilN	required for motility	2378	817.5	1560.5	1610.5	0.0611695			1286	493.5	792.5	0.0383824		0.627477			slr1275	pilN	required for motility	0.0594329	0.66406	0.0517355	0.0594329	0.66406
ssr2972	1051	816	715	488	1	ssr2972				hypothetical protein	1051	816	235	285	0.0108248			715	488	227	0.0109941		1.01564			ssr2972		hypothetical protein	0.0110314	0.97641	0.0554816	0.0110314	0.97641
sll1629	1065	812.5	796	494.5	1	sll1629	phr	DNA photolyase	phr	bacterial cryptochrome, DNA photolyase homolog	1065	812.5	252.5	302.5	0.0114895			796	494.5	301.5	0.0146023		1.27093			sll1629	phr	bacterial cryptochrome, DNA photolyase homolog	0.011972	1.18472	0.121924	0.011972	1.18472
ssl1464	1065	836.5	702	519.5	1	ssl1464				hypothetical protein	1065	836.5	228.5	278.5	0.0105779			702	519.5	182.5	0.00883886		0.835597			ssl1464		hypothetical protein	0.0101839	0.926701	0.12884	0.0101839	0.926701
sll1601	1223	841	793	511	1	sll1601		hypothetical protein		hypothetical protein	1223	841	382	432	0.0164081			793	511	282	0.0136579		0.832386			sll1601		hypothetical protein	0.0151071	0.814446	0.0253714	0.0151071	0.814446
slr0012	5248	824	2132	515	1	slr0012	rbcS	ribulose bisphosphate carboxylase small subunit	rbcS	ribulose-bisphosphate carboxylase small chain	5248	824	4424	4474	0.16993			2132	515	1617	0.0783147		0.460865			slr0012	rbcS	ribulose-bisphosphate carboxylase small chain	0.159557	0.439976	0.029541	0.159557	0.439976
slr0707	1113	820.5	798	508	1	slr0707	polA or resA	DNA polymerase I	polA, resA	DNA polymerase I	1113	820.5	292.5	342.5	0.0130087			798	508	290	0.0140453		1.07968			slr0707	polA, resA	DNA polymerase I	0.0133206	0.932757	0.207787	0.0133206	0.932757
sll1250	997	838.5	661	502.5	1	sll1250		hypothetical protein		hypothetical protein	997	838.5	158.5	208.5	0.00791918			661	502.5	158.5	0.00767649		0.969354			sll1250		hypothetical protein	0.00766698	0.98948	0.0284622	0.00766698	0.98948
slr0055	1132	816	884	516	1	slr0055	trpG	anthranilate synthase component II	trpG	anthranilate synthase component II	1132	816	316	366	0.0139013			884	516	368	0.017823		1.28211			slr0055	trpG	anthranilate synthase component II	0.0146358	1.13314	0.210678	0.0146358	1.13314
slr1676	1271	816	1256	490	1	slr1676				hypothetical protein	1271	816	455	505	0.0191807			1256	490	766	0.037099		1.93418			slr1676		hypothetical protein	0.0178451	1.92087	0.0188208	0.0178451	1.92087
sll0257	1119	818	810	501	1	sll0257		hypothetical protein		hypothetical protein	1119	818	301	351	0.0133316			810	501	309	0.0149655		1.12256			sll0257		hypothetical protein	0.0138682	0.996746	0.177932	0.0138682	0.996746
slr2092	1036	790	716	480.5	1	slr2092				hypothetical protein	1036	790	246	296	0.0112426			716	480.5	235.5	0.0114058		1.01452			slr2092		hypothetical protein	0.0115396	0.87582	0.196144	0.0115396	0.87582
sll0812	1238	812	834	506	1	sll0812				hypothetical protein	1238	812	426	476	0.0180793			834	506	328	0.0158857		0.878671			sll0812		hypothetical protein	0.0177868	0.940288	0.0871399	0.0177868	0.940288
slr0875	1427	798	917	506	1	slr0875	mscL	large-conductance mechanosensitive channel	mscL	large-conductance mechanosensitive channel	1427	798	629	679	0.0257895			917	506	411	0.0199056		0.771847			slr0875	mscL	large-conductance mechanosensitive channel	0.0225494	0.752891	0.0268082	0.0225494	0.752891
slr0885	1102	814	740	492.5	1	slr0885				hypothetical protein	1102	814	288	338	0.0128378			740	492.5	247.5	0.0119869		0.933723			slr0885		hypothetical protein	0.0130517	0.963075	0.0415103	0.0130517	0.963075
sll1832	2885	793	1596	486.5	1	sll1832				hypothetical protein	2885	793	2092	2142	0.0813567			1596	486.5	1109.5	0.0537354		0.660492			sll1832		hypothetical protein	0.0676921	0.685483	0.0353432	0.0676921	0.685483
sll1293	1340	790.5	892	486	1	sll1293				hypothetical protein	1340	790.5	549.5	599.5	0.02277			892	486	406	0.0196634		0.863567			sll1293		hypothetical protein	0.0204121	0.87359	0.0141743	0.0204121	0.87359
sll1671	1097.5	799.5	665	492.5	1	sll1671		hypothetical protein		hypothetical protein	1097.5	799.5	298	348	0.0132176			665	492.5	172.5	0.00835454		0.632076			sll1671		hypothetical protein	0.0121892	0.706918	0.105843	0.0121892	0.706918
sll1323	3783	800	2758	476.5	1	sll1323	atpG	ATP synthase subunit b'	atpG	ATP synthase subunit b' of CF(0)	3783	800	2983	3033	0.115198			2758	476.5	2281.5	0.110498		0.959196			sll1323	atpG	ATP synthase subunit b' of CF(0)	0.0939877	0.970323	0.0157358	0.0939877	0.970323
ssl3829	1070	788	722	473.5	1	ssl3829				hypothetical protein	1070	788	282	332	0.0126099			722	473.5	248.5	0.0120354		0.954438			ssl3829		hypothetical protein	0.0118081	1.05418	0.141055	0.0118081	1.05418
slr1577	2342	825	1651	467	1	slr1577				hypothetical protein	2342	825	1517	1567	0.0595173			1651	467	1184	0.0573436		0.963479			slr1577		hypothetical protein	0.0595047	1.00307	0.0559973	0.0595047	1.00307
ssr1513	1044	783	662	451	1	ssr1513		hypothetical protein		hypothetical protein	1044	783	261	311	0.0118123			662	451	211	0.0102192		0.86513			ssr1513		hypothetical protein	0.0114576	0.914996	0.0705214	0.0114576	0.914996
sll0479	1145	783	687.5	450	1	sll0479				hypothetical protein	1145	783	362	412	0.0156484			687.5	450	237.5	0.0115026		0.735065			sll0479		hypothetical protein	0.0146501	0.856327	0.17149	0.0146501	0.856327
sll1805	9204	798	8053	457	1	sll1805	rpl16	50S ribosomal protein L16	rplP, rpl16	50S ribosomal protein L16	9204	798	8406	8456	0.321173			8053	457	7596	0.36789		1.14546			sll1805	rplP, rpl16	50S ribosomal protein L16	0.338947	1.16608	0.0291633	0.338947	1.16608
slr0157	1101	835.5	687	459.5	1	slr0157				hypothetical protein	1101	835.5	265.5	315.5	0.0119832			687	459.5	227.5	0.0110183		0.919478			slr0157		hypothetical protein	0.0125761	0.971352	0.0733603	0.0125761	0.971352
slr1964	2053	850	1349	473	1	slr1964				hypothetical protein	2053	850	1203	1253	0.047591			1349	473	876	0.0424265		0.891482			slr1964		hypothetical protein	0.0483667	0.933208	0.0590099	0.0483667	0.933208
slr0960	1113	790	745	452	1	slr0960				hypothetical protein	1113	790	323	373	0.0141672			745	452	293	0.0141906		1.00166			slr0960		hypothetical protein	0.0138998	1.08215	0.11384	0.0138998	1.08215
sll1702	1224	806.5	892	496.5	1	sll1702		hypothetical protein	ycf51	hypothetical protein	1224	806.5	417.5	467.5	0.0177564			892	496.5	395.5	0.0191549		1.07876			sll1702	ycf51	hypothetical protein	0.0197494	1.05346	0.035772	0.0197494	1.05346
slr1992	2829	843.5	1497	522	1	slr1992		glutathione peroxidase	gpx2	glutathione peroxidase-like NADPH peroxidase,glutathione peroxidase	2829	843.5	1985.5	2035.5	0.0773117			1497	522	975	0.0472213		0.610791			slr1992	gpx2	glutathione peroxidase-like NADPH peroxidase,glutathione peroxidase	0.074774	0.682403	0.101274	0.074774	0.682403
slr1903	1236	784	1101	479	1	slr1903			ISY120a	putative transposase gene of IS1 family insertion sequence ISY120a	1236	784	452	502	0.0190668			1101	479	622	0.0301248		1.57996			slr1903	ISY120a	putative transposase gene of IS1 family insertion sequence ISY120a	0.0197287	1.51221	0.0958097	0.0197287	1.51221
sll1735	1381	795	837	465.5	1	sll1735		secreted protein MPB70		secreted protein MPB70	1381	795	586	636	0.0241563			837	465.5	371.5	0.0179925		0.744837			sll1735		secreted protein MPB70	0.0233355	0.754787	0.014072	0.0233355	0.754787
sll1642	1005	803	679	479	1	sll1642				hypothetical protein	1005	803	202	252	0.00957138			679	479	200	0.00968642		1.01202			sll1642		hypothetical protein	0.00961303	0.97792	0.0482232	0.00961303	0.97792
slr0695	1456	797	940	497.5	1	slr0695				hypothetical protein	1456	797	659	709	0.026929			940	497.5	442.5	0.0214312		0.795841			slr0695		hypothetical protein	0.0253977	0.795949	0.000152994	0.0253977	0.795949
slr1116	1298	842	795	490	1	slr1116				hypothetical protein	1298	842	456	506	0.0192187			795	490	305	0.0147718		0.768615			slr1116		hypothetical protein	0.0181827	0.854014	0.120773	0.0181827	0.854014
sll0577	1551	837.5	1091	525	1	sll0577				hypothetical protein	1551	837.5	713.5	763.5	0.028999			1091	525	566	0.0274126		0.945294			sll0577		hypothetical protein	0.0282767	0.949494	0.00593972	0.0282767	0.949494
slr0711	1266	833.5	863	517.5	1	slr0711				hypothetical protein	1266	833.5	432.5	482.5	0.0183262			863	517.5	345.5	0.0167333		0.913083			slr0711		hypothetical protein	0.0164813	1.00063	0.123813	0.0164813	1.00063
sml0008	1626	840.5	801	510	1	sml0008	psaJ	photosystem I subunit IX	psaJ	photosystem I reaction center subunit IX	1626	840.5	785.5	835.5	0.0317337			801	510	291	0.0140937		0.444126			sml0008	psaJ	photosystem I reaction center subunit IX	0.0285241	0.463227	0.027014	0.0285241	0.463227
slr0919	1327	848	838	495	1	slr0919				hypothetical protein	1327	848	479	529	0.0200923			838	495	343	0.0166122		0.826795			slr0919		hypothetical protein	0.0179823	0.832995	0.00876832	0.0179823	0.832995
sll1574	1201	811.5	810	498	1	sll1574			spkA', spkA	a part of spkA: serine/threonine protein kinase, regulates cellular motility	1201	811.5	389.5	439.5	0.0166929			810	498	312	0.0151108		0.905222			sll1574	spkA', spkA	a part of spkA: serine/threonine protein kinase, regulates cellular motility	0.0158868	0.865137	0.056689	0.0158868	0.865137
sll1623	1257	792.5	948	521.5	1	sll1623		ABC transporter		putative ABC-type cobalt transport system ATP-binding protein	1257	792.5	464.5	514.5	0.0195416			948	521.5	426.5	0.0206563		1.05704			sll1623		putative ABC-type cobalt transport system ATP-binding protein	0.0165387	1.1836	0.178979	0.0165387	1.1836
sll1318	1466	800	1091	501.5	1	sll1318				hypothetical protein	1466	800	666	716	0.0271949			1091	501.5	589.5	0.0285507		1.04986			sll1318		hypothetical protein	0.0238893	1.02594	0.0338286	0.0238893	1.02594
sll1915	1563	814.5	988	495	1	sll1915				hypothetical protein	1563	814.5	748.5	798.5	0.0303284			988	495	493	0.023877		0.787284			sll1915		hypothetical protein	0.0264312	0.845562	0.0824172	0.0264312	0.845562
slr1501	1949	809.5	1868	482	1	slr1501				hypothetical protein	1949	809.5	1139.5	1189.5	0.0451792			1868	482	1386	0.0671269		1.48579			slr1501		hypothetical protein	0.038655	1.46917	0.023508	0.038655	1.46917
sll0925	1247	831.5	834	497	1	sll0925				hypothetical protein	1247	831.5	415.5	465.5	0.0176805			834	497	337	0.0163216		0.923144			sll0925		hypothetical protein	0.0163612	1.01845	0.134787	0.0163612	1.01845
sll1691	3159	822	2201	507	1	sll1691				hypothetical protein	3159	822	2337	2387	0.0906622			2201	507	1694	0.082044		0.904941			sll1691		hypothetical protein	0.0745848	0.872059	0.0465031	0.0745848	0.872059
sll1742	1641	800	1679	509.5	1	sll1742	nusG	transcription antitermination protein NusG	nusG	transcription antitermination protein NusG	1641	800	841	891	0.0338417			1679	509.5	1169.5	0.0566413		1.67372			sll1742	nusG	transcription antitermination protein NusG	0.0285837	1.63034	0.0613426	0.0285837	1.63034
sll0888	1258	806	950	506	1	sll0888				hypothetical protein	1258	806	452	502	0.0190668			950	506	444	0.0215039		1.12782			sll0888		hypothetical protein	0.0160117	1.0849	0.0606876	0.0160117	1.0849
slr1649	1744	792.5	1211	490	1	slr1649		hypothetical protein		hypothetical protein	1744	792.5	951.5	1001.5	0.0380386			1211	490	721	0.0349195		0.918002			slr1649		hypothetical protein	0.0312614	0.913933	0.00575425	0.0312614	0.913933
slr0610	1390	772.5	979	496.5	1	slr0610				hypothetical protein	1390	772.5	617.5	667.5	0.0253528			979	496.5	482.5	0.0233685		0.921734			slr0610		hypothetical protein	0.0214332	0.917049	0.0066248	0.0214332	0.917049
slr0755	1114	772.5	758	453	1	slr0755		hypothetical protein		hypothetical protein	1114	772.5	341.5	391.5	0.0148698			758	453	305	0.0147718		0.993408			slr0755		hypothetical protein	0.0155835	0.978226	0.0214701	0.0155835	0.978226
slr0312	2057	815	1225	478	1	slr0312		nitrate/nitrite response regulator protein	rre32	two-component response regulator (NarL subfamily)	2057	815	1242	1292	0.0490723			1225	478	747	0.0361788		0.737255			slr0312	rre32	two-component response regulator (NarL subfamily)	0.0524768	0.744878	0.0107816	0.0524768	0.744878
sll0040	1543	797	1133	473	1	sll0040			pixI, pisI	positive phototaxis protein, homologous to chemotaxis protein CheW	1543	797	746	796	0.0302334			1133	473	660	0.0319652		1.05728			sll0040	pixI, pisI	positive phototaxis protein, homologous to chemotaxis protein CheW	0.0322441	1.0098	0.0671427	0.0322441	1.0098
sll0687	1405	808	1058	454	1	sll0687			sigI	RNA polymerase ECF-type (group 3) sigma factor	1405	808	597	647	0.0245741			1058	454	604	0.029253		1.1904			sll0687	sigI	RNA polymerase ECF-type (group 3) sigma factor	0.0259098	1.26647	0.107583	0.0259098	1.26647
sll0829	1328	805	897	473	1	sll0829	rapQ	methyltransferase	rapQ	methyltransferase	1328	805	523	573	0.0217635			897	473	424	0.0205352		0.943562			sll0829	rapQ	methyltransferase	0.0223998	0.920015	0.0333009	0.0223998	0.920015
slr0994	1717	834	1313	476.5	1	slr0994	lipB	LipB protein	lipB	lipoate-protein ligase B	1717	834	883	933	0.0354369			1313	476.5	836.5	0.0405135		1.14326			slr0994	lipB	lipoate-protein ligase B	0.0356568	1.25876	0.163353	0.0356568	1.25876
slr1365	1220	816	786	446.5	1	slr1365	bioY	BioY protein	bioY	BioY protein	1220	816	404	454	0.0172437			786	446.5	339.5	0.0164427		0.95355			slr1365	bioY	BioY protein	0.0177262	1.00698	0.0755638	0.0177262	1.00698
slr0741	1270	832.5	902	479	1	slr0741	phoU or nmpA	a negative regulator of pho regulon	phoU, nmpA	phosphate transport system regulatory protein	1270	832.5	437.5	487.5	0.0185161			902	479	423	0.0204868		1.10643			slr0741	phoU, nmpA	phosphate transport system regulatory protein	0.0196175	1.11263	0.0087617	0.0196175	1.11263
slr1762	1180.5	808	771.5	487.5	1	slr1762				hypothetical protein	1180.5	808	372.5	422.5	0.0160473			771.5	487.5	284	0.0137547		0.857139			slr1762		hypothetical protein	0.0161915	0.889991	0.0464598	0.0161915	0.889991
sll0189	1280	785	982	505.5	1	sll0189				hypothetical protein	1280	785	495	545	0.0207			982	505.5	476.5	0.0230779		1.11487			sll0189		hypothetical protein	0.0204488	1.14024	0.0358663	0.0204488	1.14024
sll0218	1053	787.5	708	498.5	1	sll0218				hypothetical protein	1053	787.5	265.5	315.5	0.0119832			708	498.5	209.5	0.0101465		0.846728			sll0218		hypothetical protein	0.0113596	0.928292	0.115349	0.0113596	0.928292
sll1658	1863	822	1455	479	1	sll1658				hypothetical protein	1863	822	1041	1091	0.041438			1455	479	976	0.0472697		1.14073			sll1658		hypothetical protein	0.0409649	1.15879	0.0255326	0.0409649	1.15879
sll1654	1817	809.5	1954	485.5	1	sll1654				hypothetical protein	1817	809.5	1007.5	1057.5	0.0401656			1954	485.5	1468.5	0.0711225		1.77073			sll1654		hypothetical protein	0.0396818	1.90085	0.184016	0.0396818	1.90085
sll2011	3267	817.5	2594	509.5	1	sll2011		hypothetical protein		hypothetical protein	3267	817.5	2449.5	2499.5	0.0949352			2594	509.5	2084.5	0.100957		1.06343			sll2011		hypothetical protein	0.0882393	1.02983	0.0475143	0.0882393	1.02983
sll1568	1427	827.5	947	509.5	1	sll1568		fibrillin		fibrillin	1427	827.5	599.5	649.5	0.0246691			947	509.5	437.5	0.021189		0.858931			sll1568		fibrillin	0.0223271	0.855064	0.00546861	0.0223271	0.855064
slr0525	1724	836	1298	520.5	1	slr0525	chlM	Mg-protoporphyrin IX methyl transferase	chlM	Mg-protoporphyrin IX methyl transferase	1724	836	888	938	0.0356268			1298	520.5	777.5	0.037656		1.05696			slr0525	chlM	Mg-protoporphyrin IX methyl transferase	0.0333767	1.00907	0.0677258	0.0333767	1.00907
slr1459	4980	833.5	3742	506	1	slr1459	apcF	phycobilisome core component	apcF	phycobilisome core component	4980	833.5	4146.5	4196.5	0.15939			3742	506	3236	0.156726		0.983288			slr1459	apcF	phycobilisome core component	0.154142	1.00612	0.0322895	0.154142	1.00612
sll0368	1839	818.5	1152	520	1	sll0368	pyrR	pyrimidine operon regulatory protein PyrR	pyrR	pyrimidine operon regulatory protein PyrR	1839	818.5	1020.5	1070.5	0.0406594			1152	520	632	0.0306091		0.752818			sll0368	pyrR	pyrimidine operon regulatory protein PyrR	0.0385191	0.745393	0.0105002	0.0385191	0.745393
sll0107	1228	834	782	479.5	1	sll0107	eda or hga	4-hydroxy-2-oxoglutarate aldolase	eda, hga	2-dehydro-3-deoxyphosphogluconate aldolase / 4-hydroxy-2-oxoglutarate aldolase	1228	834	394	444	0.0168639			782	479.5	302.5	0.0146507		0.868764			sll0107	eda, hga	2-dehydro-3-deoxyphosphogluconate aldolase / 4-hydroxy-2-oxoglutarate aldolase	0.0167736	0.813468	0.0782007	0.0167736	0.813468
slr0216	2881	820.5	2008	510	1	slr0216	cobU or cobP	cobinamide kinase / cobinamide phosphate guanylyltransferase	cobP, cobU	Bifunctional cobalamin biosynthesis protein catalyzing both reactions of cobinamide kinase and cobinamide phosphate guanylyltransferase	2881	820.5	2060.5	2110.5	0.0801603			2008	510	1498	0.0725513		0.905078			slr0216	cobP, cobU	Bifunctional cobalamin biosynthesis protein catalyzing both reactions of cobinamide kinase and cobinamide phosphate guanylyltransferase	0.0738232	0.815728	0.126359	0.0738232	0.815728
sll0396	1309	802.5	971	516.5	1	sll0396		regulatory components of sensory transduction system	rre28	two-component response regulator (OmpR subfamily)	1309	802.5	506.5	556.5	0.0211368			971	516.5	454.5	0.0220124		1.04143			sll0396	rre28	two-component response regulator (OmpR subfamily)	0.0199914	0.989161	0.0739133	0.0199914	0.989161
slr1926	1927	780	1687	496	1	slr1926				hypothetical protein	1927	780	1147	1197	0.045464			1687	496	1191	0.0576826		1.26875			slr1926		hypothetical protein	0.0396277	1.26996	0.00170258	0.0396277	1.26996
sll1571	1527	828.5	1013	529.5	1	sll1571				hypothetical protein	1527	828.5	698.5	748.5	0.0284293			1013	529.5	483.5	0.0234169		0.823691			sll1571		hypothetical protein	0.0253851	0.836474	0.0180782	0.0253851	0.836474
slr1968	1465	816.5	974	507.5	1	slr1968				hypothetical protein	1465	816.5	648.5	698.5	0.0265302			974	507.5	466.5	0.0225936		0.851618			slr1968		hypothetical protein	0.0235956	0.898082	0.0657104	0.0235956	0.898082
sll0575	1247	817	855	486	1	sll0575	rfbB	ATP-binding protein	rfbB	putative O-antigen export system ATP-binding protein, ABC transporter ATP-binding protein	1247	817	430	480	0.0182312			855	486	369	0.0178714		0.980267			sll0575	rfbB	putative O-antigen export system ATP-binding protein, ABC transporter ATP-binding protein	0.01738	0.91493	0.0924016	0.01738	0.91493
slr2118	1040	761.5	719	487.5	1	slr2118				hypothetical protein	1040	761.5	278.5	328.5	0.012477			719	487.5	231.5	0.011212		0.898618			slr2118		hypothetical protein	0.0132864	0.837547	0.0863672	0.0132864	0.837547
slr1588	1287	805	873	501	1	slr1588		hypothetical protein	rre39	two-component response regulator	1287	805	482	532	0.0202062			873	501	372	0.0180167		0.891642			slr1588	rre39	two-component response regulator	0.0179138	0.877119	0.0205393	0.0179138	0.877119
sll0238	989	802	633	478.5	1	sll0238				putative ABC-type iron transport system permease protein	989	802	187	237	0.00900165			633	478.5	154.5	0.00748276		0.831265			sll0238		putative ABC-type iron transport system permease protein	0.00838201	0.718255	0.159821	0.00838201	0.718255
slr1560	1862	829	1210	484.5	1	slr1560	hisS	histidyl tRNA synthetase	hisZ, hisS2	ATP phosphoribosyltransferase regulatory subunit	1862	829	1033	1083	0.0411341			1210	484.5	725.5	0.0351375		0.854217			slr1560	hisZ, hisS2	ATP phosphoribosyltransferase regulatory subunit	0.0333981	0.845568	0.0122316	0.0333981	0.845568
slr1718	1584	780	1202	496.5	1	slr1718				hypothetical protein	1584	780	804	854	0.0324363			1202	496.5	705.5	0.0341689		1.05341			slr1718		hypothetical protein	0.0262687	1.03525	0.0256837	0.0262687	1.03525
sll0529	1473	773	1134	441	1	sll0529				hypothetical protein	1473	773	700	750	0.0284862			1134	441	693	0.0335635		1.17823			sll0529		hypothetical protein	0.0300478	1.22896	0.071742	0.0300478	1.22896
sll0843	1191	767	821	469.5	1	sll0843				hypothetical protein	1191	767	424	474	0.0180033			821	469.5	351.5	0.0170239		0.945598			sll0843		hypothetical protein	0.0183763	1.05449	0.153997	0.0183763	1.05449
slr0031	1233	795	832	470	1	slr0031		hypothetical protein		hypothetical protein	1233	795	438	488	0.0185351			832	470	362	0.0175324		0.945906			slr0031		hypothetical protein	0.0191925	0.939813	0.00861734	0.0191925	0.939813
sll1757	1577	803.5	1380	442	1	sll1757				hypothetical protein	1577	803.5	773.5	823.5	0.0312779			1380	442	938	0.0454293		1.45244			sll1757		hypothetical protein	0.0339056	1.42185	0.0432586	0.0339056	1.42185
sll0095	1065	787	812	453	1	sll0095		ABC1-like		ABC1-like protein	1065	787	278	328	0.012458			812	453	359	0.0173871		1.39566			sll0095		ABC1-like protein	0.0120025	1.14941	0.34825	0.0120025	1.14941
sll0875	1141	799	723	445	1	sll0875				hypothetical protein	1141	799	342	392	0.0148888			723	445	278	0.0134641		0.904312			sll0875		hypothetical protein	0.0152164	0.921302	0.0240273	0.0152164	0.921302
slr0838	1672	800.5	1101	474	1	slr0838	purM or purG	phosphoribosyl formylglycinamidine cyclo-ligase	purM, purG	phosphoribosyl formylglycinamidine cyclo-ligase	1672	800.5	871.5	921.5	0.0350001			1101	474	627	0.0303669		0.867624			slr0838	purM, purG	phosphoribosyl formylglycinamidine cyclo-ligase	0.0371666	0.853508	0.0199633	0.0371666	0.853508
sll1127	1406	804	965	482	1	sll1127	menB	naphthoate synthase	menB	1,4-dihydroxy-2-naphthoate synthase	1406	804	602	652	0.024764			965	482	483	0.0233927		0.944624			sll1127	menB	1,4-dihydroxy-2-naphthoate synthase	0.0261689	0.86925	0.106595	0.0261689	0.86925
sll1580	9663	797	4288	474	1	sll1580	cpcC	phycocyanin associated linker protein	cpcC1	phycobilisome rod linker polypeptide	9663	797	8866	8916	0.338644			4288	474	3814	0.18472		0.545469			sll1580	cpcC1	phycobilisome rod linker polypeptide	0.360272	0.549664	0.00593223	0.360272	0.549664
slr1332	1109	789	847	479	1	slr1332	fabF or fabJ	beta ketoacyl-acyl carrier protein synthase	fabF, fabJ	3-oxoacyl-[acyl-carrier-protein] synthase	1109	789	320	370	0.0140532			847	479	368	0.017823		1.26825			slr1332	fabF, fabJ	3-oxoacyl-[acyl-carrier-protein] synthase	0.0147021	1.31096	0.0604022	0.0147021	1.31096
sll0727	1011	777	728	490	1	sll0727				hypothetical protein	1011	777	234	284	0.0107868			728	490	238	0.0115268		1.06861			sll0727		hypothetical protein	0.01136	1.07078	0.00306899	0.01136	1.07078
slr1503	1216	798.5	830	480.5	1	slr1503				hypothetical protein	1216	798.5	417.5	467.5	0.0177564			830	480.5	349.5	0.016927		0.95329			slr1503		hypothetical protein	0.0174902	0.992204	0.0550334	0.0174902	0.992204
sll1481	1343	809.5	1062	516	1	sll1481				putative HlyD family secretion protein, DevB homolog, ABC-transporter	1343	809.5	533.5	583.5	0.0221623			1062	516	546	0.0264439		1.19319			sll1481		putative HlyD family secretion protein, DevB homolog, ABC-transporter	0.0221937	1.1663	0.0380335	0.0221937	1.1663
sll0254	1241	826.5	839	486.5	1	sll0254				probable phytoene dehydrogenase Rieske iron-sulfur component	1241	826.5	414.5	464.5	0.0176425			839	486.5	352.5	0.0170723		0.967682			sll0254		probable phytoene dehydrogenase Rieske iron-sulfur component	0.0177132	0.906236	0.0868983	0.0177132	0.906236
slr0652	1531	798	1254	547.5	1	slr0652	hisA	phosphorybosilformimino-5-amino- phosphorybosil-4-imidazolecarboxamideisomerase	hisA	phosphoribosylformimino-5-aminoimidazole carboxamide ribotide isomerase	1531	798	733	783	0.0297396			1254	547.5	706.5	0.0342173		1.15056			slr0652	hisA	phosphoribosylformimino-5-aminoimidazole carboxamide ribotide isomerase	0.0285408	1.05583	0.133968	0.0285408	1.05583
slr1263	1468	783.5	959	520.5	1	slr1263				hypothetical protein	1468	783.5	684.5	734.5	0.0278975			959	520.5	438.5	0.0212375		0.761267			slr1263		hypothetical protein	0.0260171	0.750141	0.0157349	0.0260171	0.750141
sll0026	1483	821.5	1103	503	1	sll0026	ndhF	NADH dehydrogenase subunit 5	ndhF4	NADH dehydrogenase I chain L, involved in constitutive low-affinity CO2 uptake	1483	821.5	661.5	711.5	0.027024			1103	503	600	0.0290593		1.07532			sll0026	ndhF4	NADH dehydrogenase I chain L, involved in constitutive low-affinity CO2 uptake	0.0257058	0.975867	0.14064	0.0257058	0.975867
slr1736	1416	849	972	513	1	slr1736				homogentisate phytyltransferase	1416	849	567	617	0.0234347			972	513	459	0.0222303		0.948608			slr1736		homogentisate phytyltransferase	0.0216906	0.92208	0.0375163	0.0216906	0.92208
slr0801	1134	830	707	493	1	slr0801				hypothetical protein	1134	830	304	354	0.0134455			707	493	214	0.0103645		0.77085			slr0801		hypothetical protein	0.0123128	0.795256	0.0345154	0.0123128	0.795256
slr1407	1509	813	931	486	1	slr1407				hypothetical protein	1509	813	696	746	0.0283343			931	486	445	0.0215523		0.760642			slr1407		hypothetical protein	0.02527	0.802885	0.0597392	0.02527	0.802885
slr0092	1091	791	788	514	1	slr0092		hypothetical protein		hypothetical protein	1091	791	300	350	0.0132936			788	514	274	0.0132704		0.998256			slr0092		hypothetical protein	0.0123624	1.01174	0.0190702	0.0123624	1.01174
sll1358	1484	818	817	492	1	sll1358				putative oxalate decarboxylase, periplasmic protein	1484	818	666	716	0.0271949			817	492	325	0.0157404		0.578802			sll1358		putative oxalate decarboxylase, periplasmic protein	0.0238893	0.652459	0.104168	0.0238893	0.652459
sll0550	2725	791.5	1900	497	1	sll0550		flavoprotein		flavoprotein	2725	791.5	1933.5	1983.5	0.0753366			1900	497	1403	0.0679502		0.901955			sll0550		flavoprotein	0.0625388	0.929465	0.0389044	0.0625388	0.929465
sll1121	1079	766.5	769	530.5	1	sll1121				putative DNA helicase	1079	766.5	312.5	362.5	0.0137684			769	530.5	238.5	0.0115511		0.838957			sll1121		putative DNA helicase	0.0128121	0.835341	0.00511337	0.0128121	0.835341
slr1979	1095	776	754	491	1	slr1979	trpE	anthranilate synthase component I	trpE	anthranilate synthase component I	1095	776	319	369	0.0140152			754	491	263	0.0127376		0.908843			slr1979	trpE	anthranilate synthase component I	0.0133025	0.869626	0.0554604	0.0133025	0.869626
sll0461	1545	823	974	498.5	1	sll0461	proA	gamma-glutamyl phosphate reductase	proA	gamma-glutamyl phosphate reductase	1545	823	722	772	0.0293218			974	498.5	475.5	0.0230295		0.785403			sll0461	proA	gamma-glutamyl phosphate reductase	0.025339	0.787957	0.00361163	0.025339	0.787957
slr2072	1320	798	954	510	1	slr2072	ilvA	L-threonine deaminase	ilvA	L-threonine deaminase	1320	798	522	572	0.0217255			954	510	444	0.0215039		0.989797			slr2072	ilvA	L-threonine deaminase	0.0189244	0.897557	0.130448	0.0189244	0.897557
sll0210	1145	798	821	497	1	sll0210		hypothetical protein		putative undecaprenol kinase	1145	798	347	397	0.0150787			821	497	324	0.015692		1.04067			sll0210		putative undecaprenol kinase	0.0143363	0.952346	0.124912	0.0143363	0.952346
sll0573	1169	812.5	762	500.5	1	sll0573	arcC	carbamate kinase	arcC	carbamate kinase	1169	812.5	356.5	406.5	0.0154395			762	500.5	261.5	0.012665		0.820296			sll0573	arcC	carbamate kinase	0.0138312	0.889558	0.0979517	0.0138312	0.889558
sll0753	1186	812	833	487	1	sll0753	folD	methylenetetrahydrofolate dehydrogenase /methenyltetrahydrofolate cyclohydrolase	folD	methylenetetrahydrofolate dehydrogenase (NADP+) / methenyltetrahydrofolate cyclohydrolase	1186	812	374	424	0.0161042			833	487	346	0.0167575		1.04057			sll0753	folD	methylenetetrahydrofolate dehydrogenase (NADP+) / methenyltetrahydrofolate cyclohydrolase	0.0144242	1.03578	0.00676364	0.0144242	1.03578
sll1542	1799	768	1188	441.5	1	sll1542				hypothetical protein	1799	768	1031	1081	0.0410582			1188	441.5	746.5	0.0361546		0.880569			sll1542		hypothetical protein	0.0441541	0.884447	0.00548391	0.0441541	0.884447
sll0174	1412	771.5	864	449.5	1	sll0174				putative polar amino acid transport system substrate-binding protein	1412	771.5	640.5	690.5	0.0262263			864	449.5	414.5	0.0200751		0.765456			sll0174		putative polar amino acid transport system substrate-binding protein	0.0261856	0.798398	0.0465869	0.0261856	0.798398
slr1575	1224	784	762	432	1	slr1575		hypothetical protein		hypothetical protein	1224	784	440	490	0.018611			762	432	330	0.0159826		0.858771			slr1575		hypothetical protein	0.0187381	0.887092	0.0400515	0.0187381	0.887092
sll0355	1063	774	646	376	1	sll0355				hypothetical protein	1063	774	289	339	0.0128758			646	376	270	0.0130767		1.0156			sll0355		hypothetical protein	0.0121148	1.05459	0.0551431	0.0121148	1.05459
slr1431	2937	784.5	1508	438	1	slr1431				hypothetical protein	2937	784.5	2152.5	2202.5	0.0836546			1508	438	1070	0.0518224		0.61948			slr1431		hypothetical protein	0.0898883	0.638986	0.0275859	0.0898883	0.638986
slr0447	5770	783	3864	444	1	slr0447	amiC	negative aliphatic amidase regulator	urtA, amiC	periplasmic protein, ABC-type urea transport system substrate-binding protein	5770	783	4987	5037	0.191314			3864	444	3420	0.165638		0.865792			slr0447	urtA, amiC	periplasmic protein, ABC-type urea transport system substrate-binding protein	0.208047	0.901273	0.0501774	0.208047	0.901273
sll0496	1125	807.5	806	491.5	1	sll0496				hypothetical protein	1125	807.5	317.5	367.5	0.0139583			806	491.5	314.5	0.0152319		1.09125			sll0496		hypothetical protein	0.0141719	1.05524	0.0509148	0.0141719	1.05524
slr0950	1085	796.5	702	500	1	slr0950		hypothetical protein		hemolysin-like protein	1085	796.5	288.5	338.5	0.0128568			702	500	202	0.00978329		0.760943			slr0950		hemolysin-like protein	0.0127232	0.817206	0.0795675	0.0127232	0.817206
slr0039	1474	784	952	483	1	slr0039				hypothetical protein	1474	784	690	740	0.0281064			952	483	469	0.0227147		0.808166			slr0039		hypothetical protein	0.0292497	0.739571	0.0970073	0.0292497	0.739571
slr1677	1099	792	907	492	1	slr1677				hypothetical protein	1099	792	307	357	0.0135595			907	492	415	0.0200993		1.48231			slr1677		hypothetical protein	0.0140594	1.41579	0.094075	0.0140594	1.41579
slr2143	1181	749	894	493	1	slr2143	cefD	isopenicillin N epimerase		L-cysteine/cystine C-S-lyase (C-DES)	1181	749	432	482	0.0183072			894	493	401	0.0194213		1.06086			slr2143		L-cysteine/cystine C-S-lyase (C-DES)	0.0188372	1.03958	0.0300891	0.0188372	1.03958
slr0439	1143	786.5	718	473.5	1	slr0439				hypothetical protein	1143	786.5	356.5	406.5	0.0154395			718	473.5	244.5	0.0118417		0.766969			slr0439		hypothetical protein	0.0148932	0.795517	0.0403736	0.0148932	0.795517
sll0223	3359	824	1976	504	1	sll0223	ndhB	NADH dehydrogenase subunit 2	ndhB	NADH dehydrogenase I chain N	3359	824	2535	2585	0.0981826			1976	504	1472	0.0712921		0.726117			sll0223	ndhB	NADH dehydrogenase I chain N	0.0927304	0.760567	0.048719	0.0927304	0.760567
sll0020	1969	819.5	1612	490.5	1	sll0020	clpC	ATP-dependent Clp protease regulatory subunit	clpC	ATP-dependent Clp protease ATPase subunit	1969	819.5	1149.5	1199.5	0.045559			1612	490.5	1121.5	0.0543166		1.19223			sll0020	clpC	ATP-dependent Clp protease ATPase subunit	0.0474279	1.12525	0.0947137	0.0474279	1.12525
sll0430	3710	800.5	5544	523	1	sll0430	htpG	heat shock protein	htpG	HtpG, heat shock protein 90, molecular chaperone	3710	800.5	2909.5	2959.5	0.112407			5544	523	5021	0.243178		2.16337			sll0430	htpG	HtpG, heat shock protein 90, molecular chaperone	0.104689	2.11827	0.0637845	0.104689	2.11827
slr0369	1763	776.5	1133	497.5	1	slr0369	envD	acriflavin resistance protein	envD	acriflavin resistance protein	1763	776.5	986.5	1036.5	0.039368			1133	497.5	635.5	0.0307786		0.781818			slr0369	envD	acriflavin resistance protein	0.0374969	0.760447	0.0302233	0.0374969	0.760447
slr0756	1681	831	1185	531	1	slr0756			kaiA	circadian clock protein KaiA homolog	1681	831	850	900	0.0341835			1185	531	654	0.0316746		0.926605			slr0756	kaiA	circadian clock protein KaiA homolog	0.0318537	0.853256	0.103732	0.0318537	0.853256
slr1924	1443	862.5	1002	510.5	1	slr1924		D-alanyl-D-alanine carboxypeptidase		D-alanyl-D-alanine carboxypeptidase, periplasmic protein	1443	862.5	580.5	630.5	0.0239474			1002	510.5	491.5	0.0238044		0.994026			slr1924		D-alanyl-D-alanine carboxypeptidase, periplasmic protein	0.0215318	1.02838	0.048584	0.0215318	1.02838
sll1363	5053	838	3556	504	1	sll1363	ilvC	ketol-acid reductoisomerase	ilvC	ketol-acid reductoisomerase	5053	838	4215	4265	0.161992			3556	504	3052	0.147815		0.912483			sll1363	ilvC	ketol-acid reductoisomerase	0.147748	0.907726	0.00672785	0.147748	0.907726
sll0261	1112	812	693.5	472.5	1	sll0261				putative potassium channel protein	1112	812	300	350	0.0132936			693.5	472.5	221	0.0107035		0.805163			sll0261		putative potassium channel protein	0.0130865	0.879601	0.105272	0.0130865	0.879601
slr0557	1576	810.5	1104	521	1	slr0557	valS	valyl-tRNA synthetase	valS	valyl-tRNA synthetase	1576	810.5	765.5	815.5	0.030974			1104	521	583	0.0282359		0.911599			slr0557	valS	valyl-tRNA synthetase	0.0274009	0.901058	0.014908	0.0274009	0.901058
sll1535	3192	863	1514	512.5	1	sll1535	rfbP	galactosyl-1-phosphate transferase	rfbP	galactosyl-1-phosphate transferase	3192	863	2329	2379	0.0903584			1514	512.5	1001.5	0.0485048		0.536804			sll1535	rfbP	galactosyl-1-phosphate transferase	0.0838751	0.565593	0.0407132	0.0838751	0.565593
sll0507	1388	812.5	977	508	1	sll0507		magnesium and cobalt transport protein		magnesium and cobalt transport protein	1388	812.5	575.5	625.5	0.0237575			977	508	469	0.0227147		0.956104			sll0507		magnesium and cobalt transport protein	0.0209638	0.954689	0.00200032	0.0209638	0.954689
slr0940	1501	807.5	944	480	1	slr0940	crtQ or zds	zeta-carotene desaturase precursor	crtQ-2, crtQ, zds	zeta-carotene desaturase	1501	807.5	693.5	743.5	0.0282394			944	480	464	0.0224725		0.795786			slr0940	crtQ-2, crtQ, zds	zeta-carotene desaturase	0.0240254	0.814847	0.0269557	0.0240254	0.814847
sll0045	1063	779	737.5	507	1	sll0045	sps	sucrose phosphate synthase	spsA, sps	sucrose phosphate synthase	1063	779	284	334	0.0126859			737.5	507	230.5	0.0111636		0.880002			sll0045	spsA, sps	sucrose phosphate synthase	0.0114599	0.881416	0.00199976	0.0114599	0.881416
slr1173	2233	817	1050	518.5	1	slr1173				hypothetical protein	2233	817	1416	1466	0.0556811			1050	518.5	531.5	0.0257417		0.462305			slr1173		hypothetical protein	0.0458948	0.486371	0.0340341	0.0458948	0.486371
sll1624	1277	821	893	519.5	1	sll1624		hypothetical protein	rre18	two-component response regulator	1277	821	456	506	0.0192187			893	519.5	373.5	0.0180894		0.941238			sll1624	rre18	two-component response regulator	0.0167731	0.936357	0.00690265	0.0167731	0.936357
slr1117	1256	834	836	472.5	1	slr1117				hypothetical protein	1256	834	422	472	0.0179273			836	472.5	363.5	0.0176051		0.982023			slr1117		hypothetical protein	0.0168709	0.948873	0.0468814	0.0168709	0.948873
sll1758	1420	835	962	487.5	1	sll1758		hypothetical protein		hypothetical protein	1420	835	585	635	0.0241184			962	487.5	474.5	0.022981		0.952844			sll1758		hypothetical protein	0.0206905	0.929518	0.032988	0.0206905	0.929518
slr1317	1478	819	958	484.5	1	slr1317	fecD	iron(III) dicitrate transport system permease protein FecD	fecD	ABC-type iron(III) dicitrate transport system permease protein	1478	819	659	709	0.026929			958	484.5	473.5	0.0229326		0.851595			slr1317	fecD	ABC-type iron(III) dicitrate transport system permease protein	0.0233509	0.808316	0.0612053	0.0233509	0.808316
slr1367	1892	772.5	1649	461.5	1	slr1367	glgP or glgY	glycogen phosphorylase	glgP, glgY	glycogen phosphorylase	1892	772.5	1119.5	1169.5	0.0444196			1649	461.5	1187.5	0.0575131		1.29477			slr1367	glgP, glgY	glycogen phosphorylase	0.0484319	1.23435	0.0854441	0.0484319	1.23435
sll0902	1790	769	1192	446	1	sll0902	argF	ornithine carbamoyltransferase chain f	argF	ornithine carbamoyltransferase chain f	1790	769	1021	1071	0.0406784			1192	446	746	0.0361304		0.888196			sll0902	argF	ornithine carbamoyltransferase chain f	0.0437807	0.912934	0.0349852	0.0437807	0.912934
sll1359	1159	768.5	749	455.5	1	sll1359				hypothetical protein	1159	768.5	390.5	440.5	0.0167309			749	455.5	293.5	0.0142148		0.849614			sll1359		hypothetical protein	0.0179815	0.785866	0.0901533	0.0179815	0.785866
slr1819	1927	800	1433	453.5	1	slr1819		hypothetical protein		hypothetical protein	1927	800	1127	1177	0.0447044			1433	453.5	979.5	0.0474392		1.06118			slr1819		hypothetical protein	0.0460931	1.09817	0.0523147	0.0460931	1.09817
sll1633	2974	789	1603	464	1	sll1633	ftsZ	cell division FtsZ protein	ftsZ	cell division protein FtsZ	2974	789	2185	2235	0.084889			1603	464	1139	0.0551642		0.649839			sll1633	ftsZ	cell division protein FtsZ	0.0910461	0.618502	0.0443165	0.0910461	0.618502
sll1780	1241	761	1031	475	1	sll1780		transposase	ISY203b	transposase gene of IS4 family insertion sequence ISY203b	1241	761	480	530	0.0201303			1031	475	556	0.0269283		1.3377			sll1780	ISY203b	transposase gene of IS4 family insertion sequence ISY203b	0.0204922	1.36265	0.0352917	0.0204922	1.36265
sll1721	1916	781	1513	487.5	1	sll1721	pdhB	pyruvate dehydrogenase E1 beta subunit	pdhB	pyruvate dehydrogenase E1 component, beta subunit	1916	781	1135	1185	0.0450083			1513	487.5	1025.5	0.0496671		1.10351			sll1721	pdhB	pyruvate dehydrogenase E1 component, beta subunit	0.0463608	1.11685	0.0188637	0.0463608	1.11685
sll1814	3758	796.5	2831	499	1	sll1814	secY	preprotein translocase SecY subunit	secY	preprotein translocase SecY subunit	3758	796.5	2961.5	3011.5	0.114382			2831	499	2332	0.112944		0.987427			sll1814	secY	preprotein translocase SecY subunit	0.11873	0.920107	0.0952051	0.11873	0.920107
slr1898	1246	783.5	936	512	1	slr1898	argB	N-acetylglutamate kinase	argB	N-acetylglutamate kinase	1246	783.5	462.5	512.5	0.0194656			936	512	424	0.0205352		1.05495			slr1898	argB	N-acetylglutamate kinase	0.0207005	1.01056	0.0627817	0.0207005	1.01056
slr0591	1351	749.5	1133	483	1	slr0591			nrdF	ribonucleoside-diphosphate reductase beta chain	1351	749.5	601.5	651.5	0.0247451			1133	483	650	0.0314809		1.27221			slr0591	nrdF	ribonucleoside-diphosphate reductase beta chain	0.0251746	1.1523	0.169581	0.0251746	1.1523
sll1583	2574	773	2002	494	1	sll1583	lig or ligA	DNA ligase	lig, ligA	DNA ligase	2574	773	1801	1851	0.0703041			2002	494	1508	0.0730356		1.03885			sll1583	lig, ligA	DNA ligase	0.0715598	0.978163	0.0858296	0.0715598	0.978163
sll0447	1044	784	679	494.5	1	sll0447				hypothetical protein	1044	784	260	310	0.0117743			679	494.5	184.5	0.00893572		0.758917			sll0447		hypothetical protein	0.0114869	0.869255	0.156042	0.0114869	0.869255
sll1703	1048	811	701	501	1	sll1703	sppA	protease IV	sppA1	protease IV, endopeptidase IV	1048	811	237	287	0.0109007			701	501	200	0.00968642		0.888602			sll1703	sppA1	protease IV, endopeptidase IV	0.0107411	0.895613	0.00991392	0.0107411	0.895613
slr1491	1260	802.5	804	488.5	1	slr1491	fecB	iron(III) dicitrate-binding periplasmic protein	fecB	ABC-type iron(III) dicitrate transport system substrate-binding protein.	1260	802.5	457.5	507.5	0.0192757			804	488.5	315.5	0.0152803		0.792725			slr1491	fecB	ABC-type iron(III) dicitrate transport system substrate-binding protein.	0.0189063	0.764695	0.0396411	0.0189063	0.764695
slr0887	992	789.5	689	503.5	1	slr0887				hypothetical protein	992	789.5	202.5	252.5	0.00959037			689	503.5	185.5	0.00898416		0.936789			slr0887		hypothetical protein	0.00964183	0.950409	0.0192612	0.00964183	0.950409
sll1550	1880	813	839	509	1	sll1550				probable porin	1880	813	1067	1117	0.0424255			839	509	330	0.0159826		0.376721			sll1550		probable porin	0.0378574	0.388424	0.0165502	0.0378574	0.388424
sll1277	1109	793	793	519	1	sll1277	recF	RecF protein	recF	RecF protein	1109	793	316	366	0.0139013			793	519	274	0.0132704		0.954616			sll1277	recF	RecF protein	0.0129945	1.02081	0.0936077	0.0129945	1.02081
slr1980	1093	776.5	764	517	1	slr1980				hypothetical protein	1093	776.5	316.5	366.5	0.0139203			764	517	247	0.0119627		0.859374			slr1980		hypothetical protein	0.0128978	0.864438	0.00716056	0.0128978	0.864438
slr1237	2742	801.5	2278	488	1	slr1237	codA	cytosine deaminase	codA	cytosine deaminase	2742	801.5	1940.5	1990.5	0.0756025			2278	488	1790	0.0866935		1.1467			slr1237	codA	cytosine deaminase	0.0701348	1.05337	0.131996	0.0701348	1.05337
slr2136	2325	810	1452	489.5	1	slr2136	gcpE	GcpE protein	gcpE	GcpE protein	2325	810	1515	1565	0.0594413			1452	489.5	962.5	0.0466159		0.784234			slr2136	gcpE	GcpE protein	0.0518299	0.81565	0.0444285	0.0518299	0.81565
slr1543	1730	808.5	1351	511	1	slr1543		DNA-damage-inducible protein		DNA-damage-inducible protein	1730	808.5	921.5	971.5	0.0368992			1351	511	840	0.040683		1.10254			slr1543		DNA-damage-inducible protein	0.0321689	1.11574	0.0186676	0.0321689	1.11574
slr1843	2311	821	1215	504.5	1	slr1843	zwf	glucose 6-phosphate dehydrogenase	zwf	glucose-6-phosphate 1-dehydrogenase	2311	821	1490	1540	0.0584918			1215	504.5	710.5	0.034411		0.588305			slr1843	zwf	glucose-6-phosphate 1-dehydrogenase	0.050602	0.602379	0.0199037	0.050602	0.602379
slr1212	1029	800	688	510	1	slr1212	ETR1	ethylene response sensor protein	ETR1	ethylene response sensor domain and two-component sensor histidine kinase, phytochrome-like protein	1029	800	229	279	0.0105969			688	510	178	0.00862092		0.813533			slr1212	ETR1	ethylene response sensor domain and two-component sensor histidine kinase, phytochrome-like protein	0.0117091	0.843661	0.0426077	0.0117091	0.843661
slr0605	1420	814	1171	493.5	1	slr0605		hypothetical protein		hypothetical protein	1420	814	606	656	0.024916			1171	493.5	677.5	0.0328128		1.31694			slr0605		hypothetical protein	0.0231554	1.23218	0.11986	0.0231554	1.23218
slr2017	1337	805.5	746	487.5	1	slr2017			pilA11	type 4 pilin-like protein, essential for motility	1337	805.5	531.5	581.5	0.0220863			746	487.5	258.5	0.0125197		0.566853			slr2017	pilA11	type 4 pilin-like protein, essential for motility	0.0191145	0.612843	0.0650407	0.0191145	0.612843
slr0459	1155	817	857	507	1	slr0459				hypothetical protein	1155	817	338	388	0.0147369			857	507	350	0.0169512		1.15026			slr0459		hypothetical protein	0.0143005	1.11695	0.0471092	0.0143005	1.11695
sll1299	1221	803.5	841	480.5	1	sll1299	ackA	acetate kinase	ackA	acetate kinase	1221	803.5	417.5	467.5	0.0177564			841	480.5	360.5	0.0174598		0.983293			sll1299	ackA	acetate kinase	0.0164668	0.933864	0.0699033	0.0164668	0.933864
sll0735	1585	796	1017	492.5	1	sll0735				hypothetical protein	1585	796	789	839	0.0318666			1017	492.5	524.5	0.0254026		0.797155			sll0735		hypothetical protein	0.0272872	0.79702	0.000190868	0.0272872	0.79702
slr1243	1077	805.5	685	479	1	slr1243				hypothetical protein	1077	805.5	271.5	321.5	0.0122111			685	479	206	0.00997701		0.817044			slr1243		hypothetical protein	0.0119466	0.857088	0.0566297	0.0119466	0.857088
slr1870	1138	784.5	771	457.5	1	slr1870				hypothetical protein	1138	784.5	353.5	403.5	0.0153256			771	457.5	313.5	0.0151835		0.990726			slr1870		hypothetical protein	0.0166416	1.00495	0.0201162	0.0166416	1.00495
sll0398	1072	769	781	448.5	1	sll0398	dgt	dGTP triphosphohydrolase	dgt	dGTP triphosphohydrolase	1072	769	303	353	0.0134075			781	448.5	332.5	0.0161037		1.20109			sll0398	dgt	dGTP triphosphohydrolase	0.0144661	1.0179	0.259075	0.0144661	1.0179
sll1314	1364	770	840	454	1	sll1314	dctP	C4-dicarboxylase binding protein	dctP	periplasmic protein, putative C4-dicarboxylase binding protein, putative ABC transporter substrate-binding protein	1364	770	594	644	0.0244602			840	454	386	0.0186948		0.764295			sll1314	dctP	periplasmic protein, putative C4-dicarboxylase binding protein, putative ABC transporter substrate-binding protein	0.0255439	0.794159	0.0422349	0.0255439	0.794159
sll0060	1030	775	664	434.5	1	sll0060				hypothetical protein	1030	775	255	305	0.0115844			664	434.5	229.5	0.0111152		0.959494			sll0060		hypothetical protein	0.0113243	0.94753	0.0169189	0.0113243	0.94753
sll1132	1216	800	824	456.5	1	sll1132				hypothetical protein	1216	800	416	466	0.0176995			824	456.5	367.5	0.0177988		1.00561			sll1132		hypothetical protein	0.0187458	1.0082	0.00366416	0.0187458	1.0082
slr0228	4662	787.5	2394	498	1	slr0228	ftsH	cell division protein FtsH	ftsH	cell division protein FtsH homolog, involved in photosystem I biogenesis	4662	787.5	3874.5	3924.5	0.149059			2394	498	1896	0.0918273		0.616046			slr0228	ftsH	cell division protein FtsH homolog, involved in photosystem I biogenesis	0.156556	0.623827	0.0110041	0.156556	0.623827
sll1454	1236	805.5	796	498	1	sll1454	narB	nitrate reductase	narB	ferredoxin-nitrate reductase	1236	805.5	430.5	480.5	0.0182502			796	498	298	0.0144328		0.790828			sll1454	narB	ferredoxin-nitrate reductase	0.018355	0.823321	0.0459508	0.018355	0.823321
slr0357	1325	765.5	938	486	1	slr0357	hisS	histidyl-tRNA synthetase	hisS, hisS1	histidyl-tRNA synthetase	1325	765.5	559.5	609.5	0.0231498			938	486	452	0.0218913		0.945636			slr0357	hisS, hisS1	histidyl-tRNA synthetase	0.021693	1.04047	0.134118	0.021693	1.04047
slr1145	1157	760	878	481	1	slr1145	gltS	glutamate permease	gltS	Monocomponent sodium-dependent glutamate permease	1157	760	397	447	0.0169778			878	481	397	0.0192275		1.13251			slr1145	gltS	Monocomponent sodium-dependent glutamate permease	0.0166085	1.07731	0.0780611	0.0166085	1.07731
sll0329	3440	783	1970	469	1	sll0329	gnd	6-phosphogluconate dehydrogenase	gnd	6-phosphogluconate dehydrogenase, decarboxylating	3440	783	2657	2707	0.102816			1970	469	1501	0.0726966		0.707053			sll0329	gnd	6-phosphogluconate dehydrogenase, decarboxylating	0.101738	0.655236	0.0732798	0.101738	0.655236
slr1931	2018	825	1680	497.5	1	slr1931			pilA8	type 4 pilin-like protein	2018	825	1193	1243	0.0472112			1680	497.5	1182.5	0.057271		1.21308			slr1931	pilA8	type 4 pilin-like protein	0.0453672	1.27022	0.0808138	0.0453672	1.27022
slr0913	1043	812	688	507	1	slr0913				hypothetical protein	1043	812	231	281	0.0106728			688	507	181	0.00876621		0.821356			slr0913		hypothetical protein	0.0111292	0.821762	0.000573472	0.0111292	0.821762
sll1697	2011	777	1399	494	1	sll1697				hypothetical protein	2011	777	1234	1284	0.0487685			1399	494	905	0.0438311		0.898758			sll1697		hypothetical protein	0.0460686	0.851448	0.0669065	0.0460686	0.851448
sll0377	1195	811	803	497	1	sll0377	mfd	transcription-repair coupling factor	mfd	transcription-repair coupling factor	1195	811	384	434	0.016484			803	497	306	0.0148202		0.899065			sll0377	mfd	transcription-repair coupling factor	0.0157147	0.87788	0.0299606	0.0157147	0.87788
slr1863	1029	807	655	499	1	slr1863				hypothetical protein	1029	807	222	272	0.010331			655	499	156	0.00755541		0.731333			slr1863		hypothetical protein	0.0105142	0.81209	0.114208	0.0105142	0.81209
sll0459	1223	852	863	516	1	sll0459	uvrB	excinuclease ABC subunit B	uvrB	excinuclease ABC subunit B	1223	852	371	421	0.0159903			863	516	347	0.0168059		1.05101			sll0459	uvrB	excinuclease ABC subunit B	0.0147341	1.05029	0.00102003	0.0147341	1.05029
sll0868	1236	802.5	856	500.5	1	sll0868	lipA or lip	lipoic acid synthetase	lipA, lip	lipoic acid synthetase	1236	802.5	433.5	483.5	0.0183641			856	500.5	355.5	0.0172176		0.937567			sll0868	lipA, lip	lipoic acid synthetase	0.0180837	0.950168	0.0178205	0.0180837	0.950168
sll0402	1579	791.5	1170	496	1	sll0402	aspC or aat	aspartate aminotransferase	aspC, aat	aspartate aminotransferase	1579	791.5	787.5	837.5	0.0318096			1170	496	674	0.0326432		1.02621			sll0402	aspC, aat	aspartate aminotransferase	0.0287069	1.01316	0.0184435	0.0287069	1.01316
slr1228	1613	827.5	1089	486.5	1	slr1228	prfC or tos	peptide-chain-release factor 3	prfC, tos	peptide chain release factor RF-3	1613	827.5	785.5	835.5	0.0317337			1089	486.5	602.5	0.0291803		0.919539			slr1228	prfC, tos	peptide chain release factor RF-3	0.0291324	0.911713	0.0110674	0.0291324	0.911713
sll0005	1287	823	1080	502	1	sll0005		ABC1-like		hypothetical protein	1287	823	464	514	0.0195226			1080	502	578	0.0279938		1.43392			sll0005		hypothetical protein	0.0181415	1.33533	0.13942	0.0181415	1.33533
sll1726	1178.5	835	777.5	477	1	sll1726				hypothetical protein	1178.5	835	343.5	393.5	0.0149458			777.5	477	300.5	0.0145538		0.973776			sll1726		hypothetical protein	0.0145884	1.02925	0.0784513	0.0145884	1.02925
slr0782	1205	796	771	490	1	slr0782		hypothetical protein		putative amine oxidase	1205	796	409	459	0.0174336			771	490	281	0.0136094		0.780644			slr0782		putative amine oxidase	0.0154075	0.805076	0.0345518	0.0154075	0.805076
sll1084	1196	813.5	821	481.5	1	sll1084				hypothetical protein	1196	813.5	382.5	432.5	0.0164271			821	481.5	339.5	0.0164427		1.00095			sll1084		hypothetical protein	0.015358	0.994571	0.00902331	0.015358	0.994571
slr0337	1089	827	747	503	1	slr0337				hypothetical protein	1089	827	262	312	0.0118503			747	503	244	0.0118174		0.997228			slr0337		hypothetical protein	0.0108587	0.817786	0.25377	0.0108587	0.817786
slr1703	1414	791.5	1036	496	1	slr1703	serS	seryl-tRNA synthetase	serS	seryl-tRNA synthetase	1414	791.5	622.5	672.5	0.0255427			1036	496	540	0.0261533		1.02391			slr1703	serS	seryl-tRNA synthetase	0.0225612	1.00504	0.0266895	0.0225612	1.00504
sll0146	1439	815	1042	501.5	1	sll0146		high-affinity branched-chain amino acid transport protein BraE	natC	ABC-type neutral amino acid transport system permease protein	1439	815	624	674	0.0255996			1042	501.5	540.5	0.0261776		1.02258			sll0146	natC	ABC-type neutral amino acid transport system permease protein	0.0236227	0.849378	0.244938	0.0236227	0.849378
slr1028	1206	808.5	750	489	1	slr1028				integrin alpha subunit domain homolog	1206	808.5	397.5	447.5	0.0169968			750	489	261	0.0126408		0.743716			slr1028		integrin alpha subunit domain homolog	0.0154498	0.786841	0.0609881	0.0154498	0.786841
sll1807	4081	815.5	4786	487.5	1	sll1807	rpl24	50S ribosomal protein L24	rplX, rpl24	50S ribosomal protein L24	4081	815.5	3265.5	3315.5	0.125928			4786	487.5	4298.5	0.208185		1.65321			sll1807	rplX, rpl24	50S ribosomal protein L24	0.12514	1.60931	0.0620817
sll1807	4812	811.5	5944	521.5	1	sll1807	rpl24	50S ribosomal protein L24	rplX, rpl24	50S ribosomal protein L24	4812	811.5	4000.5	4050.5	0.153845			5944	521.5	5422.5	0.262623		1.70707			sll1807	rplX, rpl24	50S ribosomal protein L24	0.153706	1.58483	0.172869
sll1326	6611	791	4558	467	1	sll1326	atpA	ATP synthase a subunit	atpA	ATP synthase alpha chain	6611	791	5820	5870	0.222952			4558	467	4091	0.198136		0.888691			sll1326	atpA	ATP synthase alpha chain	0.274524	0.84545	0.0611516
sll1326	8073	831	4996	451	1	sll1326	atpA	ATP synthase a subunit	atpA	ATP synthase alpha chain	8073	831	7242	7292	0.276962			4996	451	4545	0.220124		0.794779			sll1326	atpA	ATP synthase alpha chain	0.323745	0.818915	0.0341334
ssr1853	1260	780	945	491	1	ssr1853				hypothetical protein	1260	780	480	530	0.0201303			945	491	454	0.0219882		1.09229			ssr1853		hypothetical protein	0.0196715	1.07686	0.0218276	0.0196715	1.07686
slr1773	1140	805	809	521.5	1	slr1773				hypothetical protein	1140	805	335	385	0.0146229			809	521.5	287.5	0.0139242		0.952218			slr1773		hypothetical protein	0.0152862	0.884773	0.0953817	0.0152862	0.884773
slr1957	1293	799	789	499.5	1	slr1957				hypothetical protein	1293	799	494	544	0.020662			789	499.5	289.5	0.0140211		0.678593			slr1957		hypothetical protein	0.019976	0.641059	0.0530798	0.019976	0.641059
sll1037	1239	804.5	836	508	1	sll1037				hypothetical protein	1239	804.5	434.5	484.5	0.0184021			836	508	328	0.0158857		0.863256			sll1037		hypothetical protein	0.0173689	0.926234	0.0890641	0.0173689	0.926234
ssr0761	1096.5	793	752	493	1	ssr0761				hypothetical protein	1096.5	793	303.5	353.5	0.0134265			752	493	259	0.0125439		0.934264			ssr0761		hypothetical protein	0.0132205	0.954074	0.0280146	0.0132205	0.954074
sll0564	1847	837	1255	515	1	sll0564				hypothetical protein	1847	837	1010	1060	0.0402606			1255	515	740	0.0358398		0.890195			sll0564		hypothetical protein	0.0376825	0.842184	0.0678981	0.0376825	0.842184
ssl1498	1386	828.5	902	475.5	1	ssl1498				hypothetical protein	1386	828.5	557.5	607.5	0.0230739			902	475.5	426.5	0.0206563		0.895225			ssl1498		hypothetical protein	0.0218481	0.866945	0.0399936	0.0218481	0.866945
sll1451	6912	853.5	2362	490.5	1	sll1451	nrtB	nitrate transport protein NrtB	nrtB	ABC-type nitrate/nitrite transport system permease protein	6912	853.5	6058.5	6108.5	0.232011			2362	490.5	1871.5	0.0906407		0.390674			sll1451	nrtB	ABC-type nitrate/nitrite transport system permease protein	0.204809	0.420181	0.0417297	0.204809	0.420181
sll0819	16466	826	3839	490.5	1	sll0819	psaF	photosystem I subunit III	psaF	photosystem I reaction center subunit III precursor (PSI-F)	16466	826	15640	15690	0.595932			3839	490.5	3348.5	0.162175		0.272136			sll0819	psaF	photosystem I reaction center subunit III precursor (PSI-F)	0.559589	0.266754	0.00761129	0.559589	0.266754
sll1941	1192	814	831	510	1	sll1941	gyrA	DNA gyrase A subunit	gyrA	DNA gyrase subunit A	1192	814	378	428	0.0162562			831	510	321	0.0155467		0.956358			sll1941	gyrA	DNA gyrase subunit A	0.0155815	0.916294	0.056659	0.0155815	0.916294
sll0378	1166	835.5	834	504.5	1	sll0378	cysG or cobA	uroporphyrin-III C-methyltransferase	cysG, cobA	uroporphyrin-III C-methyltransferase	1166	835.5	330.5	380.5	0.014452			834	504.5	329.5	0.0159584		1.10423			sll0378	cysG, cobA	uroporphyrin-III C-methyltransferase	0.0154614	0.956464	0.208975	0.0154614	0.956464
sll1193	1927	820	1319	510	1	sll1193				hypothetical protein	1927	820	1107	1157	0.0439448			1319	510	809	0.0391816		0.891609			sll1193		hypothetical protein	0.0381633	0.847579	0.0622677	0.0381633	0.847579
slr1424	1727	807	1028	498.5	1	slr1424		hypothetical protein		UDP-N-acetylmuramate dehydrogenase	1727	807	920	970	0.0368422			1028	498.5	529.5	0.0256448		0.696071			slr1424		UDP-N-acetylmuramate dehydrogenase	0.0298329	0.715049	0.0268392	0.0298329	0.715049
sll1797	1339	823	1219	506	1	sll1797	ycf21	ycf21 gene product	ycf21	Ycf21 gene product	1339	823	516	566	0.0214976			1219	506	713	0.0345321		1.60632			sll1797	ycf21	Ycf21 gene product	0.0185208	1.51809	0.12478	0.0185208	1.51809
ssr3465	1176	780.5	1102	444.5	1	ssr3465				hypothetical protein	1176	780.5	395.5	445.5	0.0169208			1102	444.5	657.5	0.0318441		1.88195			ssr3465		hypothetical protein	0.0185785	1.96913	0.123294	0.0185785	1.96913
sll1959	998.5	777	640.5	449.5	1	sll1959	suhB or ssyA	extragenic suppressor	suhB, ssyA	extragenic suppressor	998.5	777	221.5	271.5	0.010312			640.5	449.5	191	0.00925053		0.897063			sll1959	suhB, ssyA	extragenic suppressor	0.00992542	0.886934	0.0143243	0.00992542	0.886934
sll1609	1043	775	681	468	1	sll1609				hypothetical protein	1043	775	268	318	0.0120782			681	468	213	0.010316		0.854106			sll1609		hypothetical protein	0.0122857	0.949812	0.135348	0.0122857	0.949812
sll1432	1598	799	1022	440.5	1	sll1432	hypB	hydrogenase isoenzymes formation protein HypB	hypB	putative hydrogenase expression/formation protein HypB	1598	799	799	849	0.0322464			1022	440.5	581.5	0.0281633		0.873376			sll1432	hypB	putative hydrogenase expression/formation protein HypB	0.0371897	0.763244	0.15575	0.0371897	0.763244
sll1803	4002	792.5	3769	475.5	1	sll1803	rpl22	50S ribosomal protein L22	rplV, rpl22	50S ribosomal protein L22	4002	792.5	3209.5	3259.5	0.123801			3769	475.5	3293.5	0.159511		1.28845			sll1803	rplV, rpl22	50S ribosomal protein L22	0.141745	1.2762	0.017319	0.141745	1.2762
slr1993	1337	794.5	846	440	1	slr1993	thl or thi	acetyl coenzyme A acetyltransferase (thiolase)	phaA, thl, thi	acetyl coenzyme A acetyltransferase (thiolase)	1337	794.5	542.5	592.5	0.0225041			846	440	406	0.0196634		0.87377			slr1993	phaA, thl, thi	acetyl coenzyme A acetyltransferase (thiolase)	0.0239866	0.909701	0.0508139	0.0239866	0.909701
sll0359	2361	769	2111	477	1	sll0359				hypothetical protein	2361	769	1592	1642	0.0623659			2111	477	1634	0.0791381		1.26893			sll0359		hypothetical protein	0.0709023	1.20736	0.0870779	0.0709023	1.20736
slr1756	10721	728.5	8448	487	1	slr1756	glnA	glutamate--ammonia ligase	glnA	glutamate--ammonia ligase, glutamine synthetase type I	10721	728.5	9992.5	10042.5	0.381431			8448	487	7961	0.385568		1.01085			slr1756	glnA	glutamate--ammonia ligase, glutamine synthetase type I	0.421906	0.924775	0.121723	0.421906	0.924775
sll1815	1279	747.5	1054	472	1	sll1815	adk	adenylate kinase	adk	adenylate kinase	1279	747.5	531.5	581.5	0.0220863			1054	472	582	0.0281875		1.27624			sll1815	adk	adenylate kinase	0.0220495	1.2444	0.0450339	0.0220495	1.2444
slr1411	1242	772	919	487	1	slr1411				hypothetical protein	1242	772	470	520	0.0197505			919	487	432	0.0209227		1.05935			slr1411		hypothetical protein	0.0212677	0.936964	0.173081	0.0212677	0.936964
slr1095	1214	787	848	469	1	slr1095				hypothetical protein	1214	787	427	477	0.0181173			848	469	379	0.0183558		1.01317			slr1095		hypothetical protein	0.0177575	0.951707	0.0869147	0.0177575	0.951707
sll0350	1179	776.5	827	502	1	sll0350				hypothetical protein	1179	776.5	402.5	452.5	0.0171867			827	502	325	0.0157404		0.91585			sll0350		hypothetical protein	0.0170895	0.962285	0.0656691	0.0170895	0.962285
slr1516	1637	797	4105	511	1	slr1516	sodB	superoxide dismutase	sodB	superoxide dismutase	1637	797	840	890	0.0338037			4105	511	3594	0.174065		5.14929			slr1516	sodB	superoxide dismutase	0.0366939	4.89197	0.363901	0.0366939	4.89197
slr1974	1519	791	1183	493.5	1	slr1974		hypothetical protein		putative GTP-binding protein	1519	791	728	778	0.0295497			1183	493.5	689.5	0.0333939		1.13009			slr1974		putative GTP-binding protein	0.0291603	1.07781	0.0739424	0.0291603	1.07781
slr1813	1954	800	1816	499.5	1	slr1813		hypothetical protein		hypothetical protein	1954	800	1154	1204	0.0457299			1816	499.5	1316.5	0.0637609		1.39429			slr1813		hypothetical protein	0.0460748	1.32081	0.103921	0.0460748	1.32081
sll0325	1174	782	832	509	1	sll0325				hypothetical protein	1174	782	392	442	0.0167879			832	509	323	0.0156436		0.931836			sll0325		hypothetical protein	0.0155674	0.985008	0.0751955	0.0155674	0.985008
slr0686	1135	806.5	760.5	512.5	1	slr0686				hypothetical protein	1135	806.5	328.5	378.5	0.0143761			760.5	512.5	248	0.0120112		0.835498			slr0686		hypothetical protein	0.0145449	0.831789	0.00524518	0.0145449	0.831789
sll0872	1878	816	932	502.5	1	sll0872				hypothetical protein	1878	816	1062	1112	0.0422356			932	502.5	429.5	0.0208016		0.492513			sll0872		hypothetical protein	0.0399155	0.511294	0.0265596	0.0399155	0.511294
slr0730	1691	839.5	1096	489.5	1	slr0730				hypothetical protein	1691	839.5	851.5	901.5	0.0342405			1096	489.5	606.5	0.0293741		0.857876			slr0730		hypothetical protein	0.0311871	0.830821	0.0382614	0.0311871	0.830821
sll1751	1120	813	771.5	498	1	sll1751				hypothetical protein	1120	813	307	357	0.0135595			771.5	498	273.5	0.0132462		0.976896			sll1751		hypothetical protein	0.0134608	0.936643	0.0569266	0.0134608	0.936643
ssl2420	1049	846	679	489	1	ssl2420				hypothetical protein	1049	846	203	253	0.00960936			679	489	190	0.0092021		0.957618			ssl2420		hypothetical protein	0.0103851	0.892819	0.0916406	0.0103851	0.892819
ssr1114	1139.5	835	775.5	507	1	ssr1114				hypothetical protein	1139.5	835	304.5	354.5	0.0134645			775.5	507	268.5	0.013004		0.965801			ssr1114		hypothetical protein	0.0134229	0.931413	0.0486312	0.0134229	0.931413
slr0607	1116	819	816	519.5	1	slr0607				hypothetical protein	1116	819	297	347	0.0131796			816	519.5	296.5	0.0143601		1.08957			slr0607		hypothetical protein	0.0122378	1.03268	0.0804524	0.0122378	1.03268
ssr0536	1419	853	881	483.5	1	ssr0536				hypothetical protein	1419	853	566	616	0.0233967			881	483.5	397.5	0.0192518		0.822841			ssr0536		hypothetical protein	0.0218454	0.84962	0.0378711	0.0218454	0.84962
slr0582	1178	839.5	1221	498	1	slr0582				hypothetical protein	1178	839.5	338.5	388.5	0.0147559			1221	498	723	0.0350164		2.37305			slr0582		hypothetical protein	0.0142617	2.1662	0.29253	0.0142617	2.1662
ssl0438	1044	847	690	485	1	ssl0438				hypothetical protein	1044	847	197	247	0.00938147			690	485	205	0.00992858		1.05832			ssl0438		hypothetical protein	0.0103194	0.976307	0.115981	0.0103194	0.976307
slr0287	3502	841.5	2089	493	1	slr0287				hypothetical protein	3502	841.5	2660.5	2710.5	0.102949			2089	493	1596	0.0772976		0.750832			slr0287		hypothetical protein	0.0866563	0.766128	0.0216312	0.0866563	0.766128
ssr2061	1755	839.5	1256	482.5	1	ssr2061	grxC	glutaredoxin 3	grxC	glutaredoxin 3	1755	839.5	915.5	965.5	0.0366713			1256	482.5	773.5	0.0374622		1.02157			ssr2061	grxC	glutaredoxin 3	0.0312922	1.03925	0.0250075	0.0312922	1.03925
sll1245	1309	844	1000.5	492	1	sll1245	cytM	cytochrome CytM	cytM	cytochrome cM	1309	844	465	515	0.0195606			1000.5	492	508.5	0.0246277		1.25905			sll1245	cytM	cytochrome cM	0.016191	1.19628	0.0887703	0.016191	1.19628
ssl2923	1085.5	835	668.5	495	1	ssl2923	vapC	virulence associated protein C	vapC	virulence associated protein C	1085.5	835	250.5	300.5	0.0114135			668.5	495	173.5	0.00840297		0.736232			ssl2923	vapC	virulence associated protein C	0.0120885	0.78778	0.0729003	0.0120885	0.78778
slr1139	1849	743.5	1533	440	1	slr1139	trxA or trx	thioredoxin	trxA, trx	thioredoxin	1849	743.5	1105.5	1155.5	0.0438878			1533	440	1093	0.0529363		1.20617			slr1139	trxA, trx	thioredoxin	0.0506279	1.18467	0.030408	0.0506279	1.18467
sll0658	1068	774	728	449	1	sll0658				hypothetical protein	1068	774	294	344	0.0130657			728	449	279	0.0135126		1.0342			sll0658		hypothetical protein	0.0130208	1.09004	0.0789672	0.0130208	1.09004
sll1030	3111	782	1497	467	1	sll1030	ccmL	carbon dioxide concentrating mechanism protein CcmL	ccmL	carbon dioxide concentrating mechanism protein CcmL, putative carboxysome assembly protein	3111	782	2329	2379	0.0903584			1497	467	1030	0.0498851		0.55208			sll1030	ccmL	carbon dioxide concentrating mechanism protein CcmL, putative carboxysome assembly protein	0.100346	0.544979	0.0100424	0.100346	0.544979
sll1740	1891	799.5	2001	491	1	sll1740	rpl19	50S ribosomal protein L19	rplS, rpl19	50S ribosomal protein L19	1891	799.5	1091.5	1141.5	0.0433561			2001	491	1510	0.0731325		1.68679			sll1740	rplS, rpl19	50S ribosomal protein L19	0.0491552	1.59285	0.132846	0.0491552	1.59285
ssr1528	1217	760	861	475	1	ssr1528				hypothetical protein	1217	760	457	507	0.0192567			861	475	386	0.0186948		0.97082			ssr1528		hypothetical protein	0.0208374	0.911454	0.083956	0.0208374	0.911454
slr1417	1262	765	1117	477	1	slr1417		hypothetical protein	ycf57	hypothetical protein	1262	765	497	547	0.020776			1117	477	640	0.0309965		1.49194			slr1417	ycf57	hypothetical protein	0.0250824	1.32393	0.237606	0.0250824	1.32393
ssr2843	1044	753	695	479	1	ssr2843				hypothetical protein	1044	753	291	341	0.0129517			695	479	216	0.0104613		0.807716			ssr2843		hypothetical protein	0.0134079	0.869338	0.0871461	0.0134079	0.869338
ssl1045	969	764.5	682	475	1	ssl1045				hypothetical protein	969	764.5	204.5	254.5	0.00966633			682	475	207	0.0100254		1.03715			ssl1045		hypothetical protein	0.0109542	0.91394	0.174247	0.0109542	0.91394
sll0525	1056	755.5	868	483	1	sll0525				hypothetical protein	1056	755.5	300.5	350.5	0.0133126			868	483	385	0.0186464		1.40066			sll0525		hypothetical protein	0.01466	1.27845	0.172826	0.01466	1.27845
ssr2551	1138	780	758	476	1	ssr2551				hypothetical protein	1138	780	358	408	0.0154965			758	476	282	0.0136579		0.88135			ssr2551		hypothetical protein	0.0159644	0.849901	0.0444754	0.0159644	0.849901
slr0771	1001	778	713	470	1	slr0771				hypothetical protein	1001	778	223	273	0.010369			713	470	243	0.011769		1.13502			slr0771		hypothetical protein	0.0102435	1.13134	0.00520715	0.0102435	1.13134
ssl3291	1038	788	711	477	1	ssl3291				hypothetical protein	1038	788	250	300	0.0113945			711	477	234	0.0113331		0.994613			ssl3291		hypothetical protein	0.0123204	0.88901	0.149345	0.0123204	0.88901
slr1675	1052	765	1392	492.5	1	slr1675	hypA	hydrogenase expression/formation protein HypA	hypA1	putative hydrogenase expression/formation protein HypA1	1052	765	287	337	0.0127998			1392	492.5	899.5	0.0435647		3.40354			slr1675	hypA1	putative hydrogenase expression/formation protein HypA1	0.0125017	3.72715	0.457657	0.0125017	3.72715
ssr2009	1842	796	1234	495.5	1	ssr2009				hypothetical protein	1842	796	1046	1096	0.0416279			1234	495.5	738.5	0.0357671		0.85921			ssr2009		hypothetical protein	0.0396116	0.899256	0.0566336	0.0396116	0.899256
slr1450	1080	772.5	759	518.5	1	slr1450				hypothetical protein	1080	772.5	307.5	357.5	0.0135784			759	518.5	240.5	0.0116479		0.857824			slr1450		hypothetical protein	0.0130068	0.856541	0.00181567	0.0130068	0.856541
slr1182	1034.5	782.5	715.5	531.5	1	slr1182				hypothetical protein	1034.5	782.5	252	302	0.0114705			715.5	531.5	184	0.00891151		0.776909			slr1182		hypothetical protein	0.0109101	0.813705	0.0520371	0.0109101	0.813705
slr1046	1181	841.5	779	490.5	1	slr1046				Sec-independent protein translocase component, homolog of TatA/TatE/Hcf106	1181	841.5	339.5	389.5	0.0147939			779	490.5	288.5	0.0139727		0.944491			slr1046		Sec-independent protein translocase component, homolog of TatA/TatE/Hcf106	0.0148793	0.883653	0.0860383	0.0148793	0.883653
sll0543	2366	828	1100	512	1	sll0543				hypothetical protein	2366	828	1538	1588	0.0603149			1100	512	588	0.0284781		0.472157			sll0543		hypothetical protein	0.054632	0.49053	0.0259831	0.054632	0.49053
sll0403	1198	804	821	482	1	sll0403				hypothetical protein	1198	804	394	444	0.0168639			821	482	339	0.0164185		0.97359			sll0403		hypothetical protein	0.0149392	0.896381	0.10919	0.0149392	0.896381
slr0925	3128	805.5	1450	484.5	1	slr0925	ssb	single-stranded DNA-binding protein	ssb	single-stranded DNA-binding protein	3128	805.5	2322.5	2372.5	0.0901115			1450	484.5	965.5	0.0467612		0.518926			slr0925	ssb	single-stranded DNA-binding protein	0.0807298	0.496262	0.0320514	0.0807298	0.496262
slr1626	1157	832	796	490.5	1	slr1626		hypothetical protein	folB	dihydroneopterin aldolase	1157	832	325	375	0.0142431			796	490.5	305.5	0.014796		1.03882			slr1626	folB	dihydroneopterin aldolase	0.014575	0.89172	0.208027	0.014575	0.89172
slr2067	15841	816.5	8735	482.5	1	slr2067	apcA	allophycocyanin a chain	apcA	allophycocyanin alpha subunit	15841	816.5	15024.5	15074.5	0.572555			8735	482.5	8252.5	0.399686		0.698075			slr2067	apcA	allophycocyanin alpha subunit	0.572876	0.66669	0.0443845	0.572876	0.66669
sll1157	1419	819.5	1152	504	1	sll1157			ISY120b	putative transposase gene of IS1 family insertion sequence ISY120b	1419	819.5	599.5	649.5	0.0246691			1152	504	648	0.031384		1.2722			sll1157	ISY120b	putative transposase gene of IS1 family insertion sequence ISY120b	0.0228581	1.23891	0.0470755	0.0228581	1.23891
slr1188	1358	823	895	498.5	1	slr1188	im30	chloroplast membrane-associated 30 kD protein	im30	chloroplast membrane-associated 30 kD protein	1358	823	535	585	0.0222193			895	498.5	396.5	0.0192033		0.864265			slr1188	im30	chloroplast membrane-associated 30 kD protein	0.0200306	0.877028	0.0180503	0.0200306	0.877028
slr1890	1967	824.5	1279	503	1	slr1890	bfr	bacterioferritin	bfr	bacterioferritin	1967	824.5	1142.5	1192.5	0.0452931			1279	503	776	0.0375833		0.82978			slr1890	bfr	bacterioferritin	0.0388471	0.833952	0.00590131	0.0388471	0.833952
slr0789	1285	845	874	505.5	1	slr0789				hypothetical protein	1285	845	440	490	0.018611			874	505.5	368.5	0.0178472		0.958961			slr0789		hypothetical protein	0.0169617	0.932967	0.036761	0.0169617	0.932967
slr0680	2266	818	1201	508.5	1	slr0680				hypothetical protein	2266	818	1448	1498	0.0568965			1201	508.5	692.5	0.0335392		0.589478			slr0680		hypothetical protein	0.0467535	0.584885	0.00649519	0.0467535	0.584885
slr0195	1146	835.5	756	496	1	slr0195				hypothetical protein	1146	835.5	310.5	360.5	0.0136924			756	496	260	0.0125923		0.91966			slr0195		hypothetical protein	0.0132859	0.946871	0.038482	0.0132859	0.946871
sll0451	1011	833.5	660	491	1	sll0451		hypothetical protein		hypothetical protein	1011	833.5	177.5	227.5	0.00864083			660	491	169	0.00818503		0.94725			sll0451		hypothetical protein	0.00951463	0.872446	0.105789	0.00951463	0.872446
slr0184	1252	838.5	817	494	1	slr0184				hypothetical protein	1252	838.5	413.5	463.5	0.0176045			817	494	323	0.0156436		0.888612			slr0184		hypothetical protein	0.0155605	0.929394	0.0576749	0.0155605	0.929394
sll0369	1698	791	967	461	1	sll0369				hypothetical protein	1698	791	907	957	0.0363485			967	461	506	0.0245066		0.674214			sll0369		hypothetical protein	0.0388932	0.678486	0.00604039	0.0388932	0.678486
slr1288	1085	756	772	458.5	1	slr1288				hypothetical protein	1085	756	329	379	0.014395			772	458.5	313.5	0.0151835		1.05477			slr1288		hypothetical protein	0.016215	0.983978	0.100115	0.016215	0.983978
slr0780	1399	769.5	1038	465	1	slr0780		hypothetical protein		hypothetical protein	1399	769.5	629.5	679.5	0.0258085			1038	465	573	0.0277516		1.07529			slr0780		hypothetical protein	0.0296262	1.06637	0.0126164	0.0296262	1.06637
slr1505	2105	799	1263	477	1	slr1505				hypothetical protein	2105	799	1306	1356	0.0515031			1263	477	786	0.0380676		0.739132			slr1505		hypothetical protein	0.0575637	0.706114	0.0466958	0.0575637	0.706114
slr0162	1938	775	1079	479.5	1	slr0162	gspF	general secretion pathway protein F	pilC, gspF	a part of pilC, required for twitching motility	1938	775	1163	1213	0.0460718			1079	479.5	599.5	0.029035		0.630214			slr0162	pilC, gspF	a part of pilC, required for twitching motility	0.0521351	0.601861	0.040096	0.0521351	0.601861
sll1692	1815	766.5	1181	470	1	sll1692		hypothetical protein		hypothetical protein	1815	766.5	1048.5	1098.5	0.0417229			1181	470	711	0.0344352		0.825332			sll1692		hypothetical protein	0.0468518	0.780401	0.0635421	0.0468518	0.780401
sll0803	1223	772	894	466.5	1	sll0803		hypothetical protein		hypothetical protein	1223	772	451	501	0.0190288			894	466.5	427.5	0.0207047		1.08807			sll0803		hypothetical protein	0.0218917	0.962195	0.178017	0.0218917	0.962195
sll1799	3880	762.5	4237	497	1	sll1799	rpl3	50S ribosomal protein L3	rplC, rpl3	50S ribosomal protein L3	3880	762.5	3117.5	3167.5	0.120307			4237	497	3740	0.181136		1.50562			sll1799	rplC, rpl3	50S ribosomal protein L3	0.12622	1.41674	0.125685	0.12622	1.41674
sll1307	1234	756	810	452.5	1	sll1307				periplasmic protein, function unknown	1234	756	478	528	0.0200543			810	452.5	357.5	0.0173145		0.863379			sll1307		periplasmic protein, function unknown	0.0212266	0.80163	0.087326	0.0212266	0.80163
slr1461	1173	785	752	457	1	slr1461		hypothetical protein		hypothetical protein	1173	785	388	438	0.016636			752	457	295	0.0142875		0.85883			slr1461		hypothetical protein	0.0167562	0.834755	0.0340472	0.0167562	0.834755
sll0981	1226	770	907	468.5	1	sll0981				hypothetical protein	1226	770	456	506	0.0192187			907	468.5	438.5	0.0212375		1.10504			sll0981		hypothetical protein	0.0200171	1.05849	0.0658296	0.0200171	1.05849
slr0505	1099	773.5	797	496	1	slr0505				hypothetical protein	1099	773.5	325.5	375.5	0.0142621			797	496	301	0.0145781		1.02215			slr0505		hypothetical protein	0.014401	1.05345	0.0442657	0.014401	1.05345
sll1045	1377	761.5	1016	501.5	1	sll1045	mutT	mutator MutT protein	mutT	mutator MutT protein	1377	761.5	615.5	665.5	0.0252768			1016	501.5	514.5	0.0249183		0.985818			sll1045	mutT	mutator MutT protein	0.0243206	0.893966	0.129898	0.0243206	0.893966
slr0434	2751	774.5	1768	492	1	slr0434	efp	elongation factor P	efp	elongation factor EF-P	2751	774.5	1976.5	2026.5	0.0769698			1768	492	1276	0.0617994		0.802904			slr0434	efp	elongation factor EF-P	0.0756844	0.803932	0.00145379	0.0756844	0.803932
sll0595	1094	789	783	512	1	sll0595				hypothetical protein	1094	789	305	355	0.0134835			783	512	271	0.0131251		0.97342			sll0595		hypothetical protein	0.0136352	0.953861	0.0276604	0.0136352	0.953861
slr1687	1202	798.5	1529	509	1	slr1687				hypothetical protein	1202	798.5	403.5	453.5	0.0172247			1529	509	1020	0.0494007		2.86802			slr1687		hypothetical protein	0.0172533	2.79327	0.105709	0.0172533	2.79327
sll0400	1684	806.5	1002	475.5	1	sll0400				hypothetical protein	1684	806.5	877.5	927.5	0.035228			1002	475.5	526.5	0.0254995		0.723842			sll0400		hypothetical protein	0.0336021	0.715107	0.0123539	0.0336021	0.715107
slr1958	1642	840	979	515	1	slr1958				hypothetical protein	1642	840	802	852	0.0323604			979	515	464	0.0224725		0.694445			slr1958		hypothetical protein	0.0301891	0.758599	0.0907272	0.0301891	0.758599
slr0992	1148	817	877	513	1	slr0992		hypothetical protein		hypothetical tRNA/rRNA methyltransferase slr0992	1148	817	331	381	0.014471			877	513	364	0.0176293		1.21825			slr0992		hypothetical tRNA/rRNA methyltransferase slr0992	0.0143993	1.14603	0.102133	0.0143993	1.14603
slr0867	1078	799.5	712.5	500	1	slr0867				hypothetical protein	1078	799.5	278.5	328.5	0.012477			712.5	500	212.5	0.0102918		0.824865			slr0867		hypothetical protein	0.0126685	0.899201	0.105127	0.0126685	0.899201
slr0232	2814	823.5	2128	525.5	1	slr0232		hypothetical protein		hypothetical protein	2814	823.5	1990.5	2040.5	0.0775016			2128	525.5	1602.5	0.0776125		1.00143			slr0232		hypothetical protein	0.0677052	0.931996	0.0981958	0.0677052	0.931996
slr0948	1563	820	987	506.5	1	slr0948				hypothetical protein	1563	820	743	793	0.0301195			987	506.5	480.5	0.0232716		0.772644			slr0948		hypothetical protein	0.0275336	0.740196	0.0458885	0.0275336	0.740196
sll0293	2017	852	1781	505	1	sll0293				hypothetical protein	2017	852	1165	1215	0.0461477			1781	505	1276	0.0617994		1.33916			sll0293		hypothetical protein	0.0415529	1.28842	0.071763	0.0415529	1.28842
slr2084	1427	853	1009	489	1	slr2084				hypothetical protein	1427	853	574	624	0.0237006			1009	489	520	0.0251847		1.06262			slr2084		hypothetical protein	0.0210029	1.01641	0.0653448	0.0210029	1.01641
slr0945	1051	832	666.5	496	1	slr0945				hypothetical protein	1051	832	219	269	0.0102171			666.5	496	170.5	0.00825767		0.808224			slr0945		hypothetical protein	0.00960761	0.731154	0.108993	0.00960761	0.731154
slr1752	1715	877.5	1365	512	1	slr1752				hypothetical protein	1715	877.5	837.5	887.5	0.0337087			1365	512	853	0.0413126		1.22558			slr1752		hypothetical protein	0.0290579	1.17757	0.0678932	0.0290579	1.17757
slr0808	1063	840	718	508.5	1	slr0808			rimM	probable 16S rRNA processing protein	1063	840	223	273	0.010369			718	508.5	209.5	0.0101465		0.978545			slr0808	rimM	probable 16S rRNA processing protein	0.00939394	0.897075	0.115215	0.00939394	0.897075
sll1022	1764	846	1521	463.5	1	sll1022				hypothetical protein	1764	846	918	968	0.0367662			1521	463.5	1057.5	0.051217		1.39304			sll1022		hypothetical protein	0.0300942	1.35944	0.0475219	0.0300942	1.35944
sll0847	1266	832.5	812	485	1	sll0847				hypothetical protein	1266	832.5	433.5	483.5	0.0183641			812	485	327	0.0158373		0.862404			sll0847		hypothetical protein	0.0153417	0.81361	0.0690045	0.0153417	0.81361
sll1394	1898	848.5	1264	493	1	sll1394	msrA or pms	peptide methionine sulfoxide reductase	msrA, pms	peptide methionine sulfoxide reductase	1898	848.5	1049.5	1099.5	0.0417608			1264	493	771	0.0373412		0.894167			sll1394	msrA, pms	peptide methionine sulfoxide reductase	0.0328039	0.890357	0.00538754	0.0328039	0.890357
slr1541	1884	770.5	1117	437	1	slr1541				hypothetical protein	1884	770.5	1113.5	1163.5	0.0441917			1117	437	680	0.0329338		0.74525			slr1541		hypothetical protein	0.0554527	0.69378	0.072789	0.0554527	0.69378
slr1944	1413	746.5	921	462	1	slr1944				periplasmic protein, function unknown	1413	746.5	666.5	716.5	0.0272139			921	462	459	0.0222303		0.816876			slr1944		periplasmic protein, function unknown	0.0314102	0.770926	0.0649821	0.0314102	0.770926
sll1300	1101.5	761	707	470	1	sll1300		hypothetical protein		hypothetical methlytransferase	1101.5	761	340.5	390.5	0.0148318			707	470	237	0.0114784		0.773903			sll1300		hypothetical methlytransferase	0.0165879	0.745792	0.0397549	0.0165879	0.745792
slr1534	1229	774	867	465	1	slr1534				hypothetical protein	1229	774	455	505	0.0191807			867	465	402	0.0194697		1.01507			slr1534		hypothetical protein	0.0211181	0.948114	0.0946844	0.0211181	0.948114
slr1083	1671	795.5	1284	493.5	1	slr1083				hypothetical protein	1671	795.5	875.5	925.5	0.035152			1284	493.5	790.5	0.0382856		1.08914			slr1083		hypothetical protein	0.036644	1.125	0.0507161	0.036644	1.125
sll1713	4369	773.5	1839	471	1	sll1713	hisC	histidinol-phosphate aminotransferase	hisC	histidinol-phosphate aminotransferase	4369	773.5	3595.5	3645.5	0.138462			1839	471	1368	0.0662551		0.478507			sll1713	hisC	histidinol-phosphate aminotransferase	0.154337	0.451043	0.0388405	0.154337	0.451043
slr0388	1041	775.5	707	475	1	slr0388				hypothetical protein	1041	775.5	265.5	315.5	0.0119832			707	475	232	0.0112362		0.937666			slr0388		hypothetical protein	0.0127113	0.863552	0.104813	0.0127113	0.863552
sll0807	3630	735.5	2414	479	1	sll0807	cfxE	pentose-5-phosphate-3-epimerase	rpe	pentose-5-phosphate-3-epimerase	3630	735.5	2894.5	2944.5	0.111837			2414	479	1935	0.0937161		0.837971			sll0807	rpe	pentose-5-phosphate-3-epimerase	0.12494	0.746515	0.129339	0.12494	0.746515
slr0397	1136	752.5	872	488.5	1	slr0397				hypothetical protein	1136	752.5	383.5	433.5	0.0164651			872	488.5	383.5	0.0185737		1.12807			slr0397		hypothetical protein	0.0185437	1.01091	0.165694	0.0185437	1.01091
sll1162	1085	760	719	464	1	sll1162				hypothetical protein	1085	760	325	375	0.0142431			719	464	255	0.0123502		0.867098			sll1162		hypothetical protein	0.014015	0.862317	0.00676146	0.014015	0.862317
sll1380	2041	763.5	1676	463	1	sll1380				periplasmic protein, function unkown	2041	763.5	1277.5	1327.5	0.0504207			1676	463	1213	0.0587481		1.16516			sll1380		periplasmic protein, function unkown	0.0525138	1.13117	0.0480639	0.0525138	1.13117
slr1035	1178	768.5	777	496	1	slr1035				hypothetical protein	1178	768.5	409.5	459.5	0.0174526			777	496	281	0.0136094		0.779795			slr1035		hypothetical protein	0.0182072	0.816004	0.0512073	0.0182072	0.816004
sll1980	4176	771.5	3448	498	1	sll1980	trxA	thiol:disulfide interchange protein TrxA	txlA	thiol:disulfide interchange protein TrxA	4176	771.5	3404.5	3454.5	0.131208			3448	498	2950	0.142875		1.08892			sll1980	txlA	thiol:disulfide interchange protein TrxA	0.133022	1.04499	0.0621242	0.133022	1.04499
slr1290	1392	799.5	1084	513.5	1	slr1290				hypothetical protein	1392	799.5	592.5	642.5	0.0244032			1084	513.5	570.5	0.0276305		1.13225			slr1290		hypothetical protein	0.0240962	1.07016	0.0878086	0.0240962	1.07016
sll1776	1224	809.5	840	504	1	sll1776	deoC or dra	deoxyribose-phosphate aldolase	deoC, dra	deoxyribose-phosphate aldolase	1224	809.5	414.5	464.5	0.0176425			840	504	336	0.0162732		0.922387			sll1776	deoC, dra	deoxyribose-phosphate aldolase	0.0178194	0.849198	0.103505	0.0178194	0.849198
slr0926	2019	818	1243	507	1	slr0926	ubiA or cyr	4-hydroxybenzoate-octaprenyl transferase	ubiA, cyr	4-hydroxybenzoate-octaprenyl transferase	2019	818	1201	1251	0.0475151			1243	507	736	0.035646		0.750205			slr0926	ubiA, cyr	4-hydroxybenzoate-octaprenyl transferase	0.0446406	0.772204	0.0311117	0.0446406	0.772204
sll1825	1939	825.5	1150	511	1	sll1825				aklaviketone reductase	1939	825.5	1113.5	1163.5	0.0441917			1150	511	639	0.0309481		0.700316			sll1825		aklaviketone reductase	0.0423417	0.672419	0.039452	0.0423417	0.672419
slr1647	1420	801	1029	484	1	slr1647				putative membrane protein	1420	801	619	669	0.0254097			1029	484	545	0.0263955		1.03879			slr1647		putative membrane protein	0.0235374	1.00791	0.0436771	0.0235374	1.00791
slr1918	3134	811.5	2201	508.5	1	slr1918				hypothetical protein	3134	811.5	2322.5	2372.5	0.0901115			2201	508.5	1692.5	0.0819713		0.909666			slr1918		hypothetical protein	0.083211	0.90017	0.0134288	0.083211	0.90017
sll1949	2546	828.5	1368	508	1	sll1949				hypothetical protein	2546	828.5	1717.5	1767.5	0.0671326			1368	508	860	0.0416516		0.620438			sll1949		hypothetical protein	0.0610821	0.636694	0.022989	0.0610821	0.636694
sll1663	1477	827.5	1022	490.5	1	sll1663				hypothetical protein	1477	827.5	649.5	699.5	0.0265682			1022	490.5	531.5	0.0257417		0.968891			sll1663		hypothetical protein	0.0240008	0.9397	0.0412828	0.0240008	0.9397
slr1207	1261	827	1081	519	1	slr1207				putative HlyD family secretion protein	1261	827	434	484	0.0183831			1081	519	562	0.0272188		1.48064			slr1207		putative HlyD family secretion protein	0.0173884	1.36781	0.15957	0.0173884	1.36781
sll0184	1438	817.5	1209	510.5	1	sll0184	rpoD	RNA polymerase sigma factor	sigC, rpoD	probable RNA polymerase sigma-C factor	1438	817.5	620.5	670.5	0.0254667			1209	510.5	698.5	0.0338298		1.32839			sll0184	sigC, rpoD	probable RNA polymerase sigma-C factor	0.0218087	1.31627	0.0171453	0.0218087	1.31627
sll1582	1219	845	805	514	1	sll1582				hypothetical protein	1219	845	374	424	0.0161042			805	514	291	0.0140937		0.875158			sll1582		hypothetical protein	0.0147718	0.935059	0.0847128	0.0147718	0.935059
slr0719	1334	867.5	902	524	1	slr0719		hypothetical protein		hypothetical protein	1334	867.5	466.5	516.5	0.0196175			902	524	378	0.0183073		0.933213			slr0719		hypothetical protein	0.0168374	0.829284	0.146978	0.0168374	0.829284
slr2043	1175.5	841	807	525	1	slr2043		adhesion protein		ABC-type zinc transport system substrate-binding protein, manganese transport system substrate-binding protein	1175.5	841	334.5	384.5	0.0146039			807	525	282	0.0136579		0.935217			slr2043		ABC-type zinc transport system substrate-binding protein, manganese transport system substrate-binding protein	0.0142051	0.946259	0.015617	0.0142051	0.946259
sll0063	1332	847	876	501	1	sll0063				hypothetical protein	1332	847	485	535	0.0203202			876	501	375	0.018162		0.893793			sll0063		hypothetical protein	0.016426	0.87329	0.0289952	0.016426	0.87329
slr1593	1953	853.5	1172	509	1	slr1593		hypothetical protein		hypothetical protein	1953	853.5	1099.5	1149.5	0.0436599			1172	509	663	0.0321105		0.735468			slr1593		hypothetical protein	0.0348831	0.771165	0.0504821	0.0348831	0.771165
sll0336	3109	827.5	2144	493.5	1	sll0336	accD or ycf11	acetyl-CoA carboxylase beta subunit	accD, ycf11, zfpA	acetyl-CoA carboxylase carboxyl transferase subunit beta	3109	827.5	2281.5	2331.5	0.0885542			2144	493.5	1650.5	0.0799372		0.902692			sll0336	accD, ycf11, zfpA	acetyl-CoA carboxylase carboxyl transferase subunit beta	0.0666856	0.893701	0.0127146	0.0666856	0.893701
sll1023	1742	864.5	1062	488.5	1	sll1023	sucC	succinate--CoA ligase	sucC	succinyl-CoA synthetase beta chain	1742	864.5	877.5	927.5	0.035228			1062	488.5	573.5	0.0277758		0.788459			sll1023	sucC	succinyl-CoA synthetase beta chain	0.0282534	0.842477	0.0763934	0.0282534	0.842477
slr0990	2041	730	1907	459	1	slr0990				hypothetical protein	2041	730	1311	1361	0.051693			1907	459	1448	0.0701297		1.35666			slr0990		hypothetical protein	0.0618874	1.3455	0.0157724	0.0618874	1.3455
slr0966	1362	796	988	461.5	1	slr0966	trpA	tryptophan synthase alpha chain	trpA	tryptophan synthase alpha chain	1362	796	566	616	0.0233967			988	461.5	526.5	0.0254995		1.08988			slr0966	trpA	tryptophan synthase alpha chain	0.0285554	0.979838	0.155617	0.0285554	0.979838
sll0422	1186	755.5	977	463.5	1	sll0422		asparaginase		asparaginase	1186	755.5	430.5	480.5	0.0182502			977	463.5	513.5	0.0248699		1.36272			sll0422		asparaginase	0.0199576	1.42009	0.0811296	0.0199576	1.42009
slr1105	2021	781.5	1475	483	1	slr1105	fus	elongation factor EF-G	fus	elongation factor EF-G	2021	781.5	1239.5	1289.5	0.0489774			1475	483	992	0.0480447		0.980956			slr1105	fus	elongation factor EF-G	0.0569767	0.90544	0.106796	0.0569767	0.90544
slr1690	1089	785	753	484	1	slr1690		hypothetical protein		hypothetical protein	1089	785	304	354	0.0134455			753	484	269	0.0130282		0.968966			slr1690		hypothetical protein	0.0146782	0.950923	0.0255165	0.0146782	0.950923
sll1043	2638	760.5	2306	471	1	sll1043	pnp	polyribonucleotide nucleotidyltransferase	pnp	polyribonucleotide nucleotidyltransferase	2638	760.5	1877.5	1927.5	0.0732097			2306	471	1835	0.0888729		1.21395			sll1043	pnp	polyribonucleotide nucleotidyltransferase	0.0824935	1.18118	0.0463448	0.0824935	1.18118
sll1104	1140	778	770	483	1	sll1104	glnH	glutamine-binding protein	gtrC, glnH	TRAP-type sodium-dependent glutamate permease periplasmic substrate-binding protein	1140	778	362	412	0.0156484			770	483	287	0.0139		0.888268			sll1104	gtrC, glnH	TRAP-type sodium-dependent glutamate permease periplasmic substrate-binding protein	0.0171603	0.859569	0.0405865	0.0171603	0.859569
slr0896	1097	743.5	835	477.5	1	slr0896		hypothetical protein		multidrug resistance protein NorM, putative	1097	743.5	353.5	403.5	0.0153256			835	477.5	357.5	0.0173145		1.12977			slr0896		multidrug resistance protein NorM, putative	0.0158693	1.11379	0.0226125	0.0158693	1.11379
slr0417	1983	770	1440	498	1	slr0417	gyrA	DNA gyrase A subunit	gyrA	DNA gyrase subunit A	1983	770	1213	1263	0.0479708			1440	498	942	0.045623		0.951058			slr0417	gyrA	DNA gyrase subunit A	0.0523702	0.919784	0.0442279	0.0523702	0.919784
slr1019	1090	753	699	454	1	slr1019		hypothetical protein		hypothetical protein	1090	753	337	387	0.0146989			699	454	245	0.0118659		0.807262			slr1019		hypothetical protein	0.0141463	0.870772	0.0898161	0.0141463	0.870772
slr0484	1404	756	978	470	1	slr0484		sensory transduction histidine kinase	hik26	two-component sensor histidine kinase	1404	756	648	698	0.0265112			978	470	508	0.0246035		0.928042			slr0484	hik26	two-component sensor histidine kinase	0.0273804	0.889385	0.0546696	0.0273804	0.889385
sll1006	1155	777	766	500.5	1	sll1006				hypothetical protein	1155	777	378	428	0.0162562			766	500.5	265.5	0.0128587		0.791007			sll1006		hypothetical protein	0.016489	0.875599	0.119631	0.016489	0.875599
slr0008	2937	802.5	2561	505	1	slr0008	ctpA	carboxyl-terminal processing protease	ctpA	carboxyl-terminal processing protease	2937	802.5	2134.5	2184.5	0.0829709			2561	505	2056	0.0995764		1.20014			slr0008	ctpA	carboxyl-terminal processing protease	0.0849508	1.12908	0.100488	0.0849508	1.12908
slr0681	1852	789.5	1140	493.5	1	slr0681		hypothetical protein		hypothetical protein	1852	789.5	1062.5	1112.5	0.0422546			1140	493.5	646.5	0.0313114		0.741017			slr0681		hypothetical protein	0.0411608	0.702629	0.0542885	0.0411608	0.702629
sll0166	2501	828.5	1582	489.5	1	sll0166	hemD	uroporphyrin-III synthase	cobA/hemD	a fusion protein between uroporphyrinogen-III C-methyltransferase (CobA/CorA) and uroporphyrinogen-III synthase (HemD)	2501	828.5	1672.5	1722.5	0.0654234			1582	489.5	1092.5	0.0529121		0.808764			sll0166	cobA/hemD	a fusion protein between uroporphyrinogen-III C-methyltransferase (CobA/CorA) and uroporphyrinogen-III synthase (HemD)	0.0616178	0.820531	0.0166419	0.0616178	0.820531
sll0927	3559	833.5	3128	513.5	1	sll0927	metX	S-adenosylmethionine synthetase	metX	S-adenosylmethionine synthetase	3559	833.5	2725.5	2775.5	0.105418			3128	513.5	2614.5	0.126626		1.20118			sll0927	metX	S-adenosylmethionine synthetase	0.101398	1.12852	0.102754	0.101398	1.12852
slr0143	1251	831.5	760	519.5	1	slr0143		beta transducin-like protein	hat	beta transducin-like Hat protein, involved in the control of a high-affinity transport system for inorganic carbon	1251	831.5	419.5	469.5	0.0178324			760	519.5	240.5	0.0116479		0.653189			slr0143	hat	beta transducin-like Hat protein, involved in the control of a high-affinity transport system for inorganic carbon	0.0173351	0.607917	0.0640241	0.0173351	0.607917
sll1196	1519	834	973	494.5	1	sll1196	pfkA	phosphofructokinase	pfkA	phosphofructokinase	1519	834	685	735	0.0279165			973	494.5	478.5	0.0231748		0.830145			sll1196	pfkA	phosphofructokinase	0.0266252	0.822651	0.0105981	0.0266252	0.822651
slr1629	1272	830	880	500	1	slr1629		hypothetical protein		hypothetical protein	1272	830	442	492	0.018687			880	500	380	0.0184042		0.984868			slr1629		hypothetical protein	0.0171831	0.983054	0.00256495	0.0171831	0.983054
sll0228	1573	848	1110	481.5	1	sll0228		arginase	speB1, bcp	agmatinase	1573	848	725	775	0.0294358			1110	481.5	628.5	0.0304396		1.0341			sll0228	speB1, bcp	agmatinase	0.026207	1.06078	0.0377309	0.026207	1.06078
slr1672	1443	843	956	502	1	slr1672	glpK	glycerol kinase	glpK	glycerol kinase	1443	843	600	650	0.0246881			956	502	454	0.0219882		0.890639			slr1672	glpK	glycerol kinase	0.0211394	0.781368	0.154532	0.0211394	0.781368
slr1318	3012	832.5	1016	523.5	1	slr1318	fecE	iron(III) dicitrate transport system permease protein FecE	fecE	ABC-type iron(III) dicitrate transport system ATP-binding protein.	3012	832.5	2179.5	2229.5	0.0846801			1016	523.5	492.5	0.0238528		0.281681			slr1318	fecE	ABC-type iron(III) dicitrate transport system ATP-binding protein.	0.072675	0.307842	0.036996	0.072675	0.307842
sll1387	1684	852.5	1327	488	1	sll1387			pppA	serine/threonine protein phosphatase PppA	1684	852.5	831.5	881.5	0.0334808			1327	488	839	0.0406345		1.21367			sll1387	pppA	serine/threonine protein phosphatase PppA	0.0284902	1.15937	0.0767837	0.0284902	1.15937
slr1938	2005	824.5	1247	504	1	slr1938		hypothetical protein		translation initiation factor, eIF-2B	2005	824.5	1180.5	1230.5	0.0467364			1247	504	743	0.0359851		0.769957			slr1938		translation initiation factor, eIF-2B	0.0391826	0.772243	0.00323246	0.0391826	0.772243
slr0765	1450	878	925	537	1	slr0765				hypothetical protein	1450	878	572	622	0.0236246			925	537	388	0.0187917		0.795428			slr0765		hypothetical protein	0.021689	0.869469	0.10471	0.021689	0.869469
slr1530	1195	856	834	532.5	1	slr1530				hypothetical protein	1195	856	339	389	0.0147749			834	532.5	301.5	0.0146023		0.988319			slr1530		hypothetical protein	0.0140685	0.940423	0.0677356	0.0140685	0.940423
slr0796	1306	830.5	839	497	1	slr0796	nreB	nickel resistance	nrsD, nreB	nickel permease involved in nickel and cobalt tolerance	1306	830.5	475.5	525.5	0.0199594			839	497	342	0.0165638		0.829875			slr0796	nrsD, nreB	nickel permease involved in nickel and cobalt tolerance	0.0195957	0.859215	0.0414921	0.0195957	0.859215
slr1478	1214	814	835	485	1	slr1478				hypothetical protein	1214	814	400	450	0.0170917			835	485	350	0.0169512		0.991779			slr1478		hypothetical protein	0.016482	0.975662	0.0227929	0.016482	0.975662
slr0116	1298	848.5	889	475.5	1	slr0116			pcyA	3Z-phycocyanobilin:ferredoxin oxidoreductase	1298	848.5	449.5	499.5	0.0189718			889	475.5	413.5	0.0200267		1.0556			slr0116	pcyA	3Z-phycocyanobilin:ferredoxin oxidoreductase	0.0178951	0.969838	0.121286	0.0178951	0.969838
slr1353	2021	871.5	1441	481.5	1	slr1353				hypothetical protein	2021	871.5	1149.5	1199.5	0.045559			1441	481.5	959.5	0.0464706		1.02001			slr1353		hypothetical protein	0.0353982	1.02092	0.00128145	0.0353982	1.02092
sll0587	1137	758.5	766	460.5	1	sll0587	pykF	pyruvate kinase	pyk1	pyruvate kinase 1	1137	758.5	378.5	428.5	0.0162751			766	460.5	305.5	0.014796		0.909117			sll0587	pyk1	pyruvate kinase 1	0.0173578	0.947306	0.0540074	0.0173578	0.947306
sll1229	1115	790	757	462	1	sll1229		regulatory components of sensory transduction system	hik41	two-component hybrid histidine kinase	1115	790	325	375	0.0142431			757	462	295	0.0142875		1.00311			sll1229	hik41	two-component hybrid histidine kinase	0.0163804	0.875152	0.180965	0.0163804	0.875152
slr0503	1877	760	1228	484	1	slr0503		hypothetical protein	ycf66	Hypothetical protein	1877	760	1117	1167	0.0443246			1228	484	744	0.0360335		0.812946			slr0503	ycf66	Hypothetical protein	0.0492919	0.803962	0.0127048	0.0492919	0.803962
slr1517	1694	773	1394	483.5	1	slr1517	leuB	3-isopropylmalate dehydrogenase	leuB	3-isopropylmalate dehydrogenase	1694	773	921	971	0.0368802			1394	483.5	910.5	0.0440974		1.19569			slr1517	leuB	3-isopropylmalate dehydrogenase	0.0399507	1.13037	0.0923823	0.0399507	1.13037
slr0833	1101	779	746	468	1	slr0833	dnaB	replicative DNA helicase	dnaB	replicative DNA helicase [Contains: Ssp dnaB intein]	1101	779	322	372	0.0141292			746	468	278	0.0134641		0.952931			slr0833	dnaB	replicative DNA helicase [Contains: Ssp dnaB intein]	0.0157924	1.03694	0.118807	0.0157924	1.03694
slr2102	1495	789	935	466	1	slr2102	ftsY	cell division protein FtsY	ftsY	cell division protein FtsY	1495	789	706	756	0.0287141			935	466	469	0.0227147		0.791062			slr2102	ftsY	cell division protein FtsY	0.0336954	0.768957	0.0312614	0.0336954	0.768957
slr0208	1283	767	1070	471	1	slr0208				hypothetical protein	1283	767	516	566	0.0214976			1070	471	599	0.0290108		1.34949			slr0208		hypothetical protein	0.0234737	1.31274	0.0519661	0.0234737	1.31274
sll1600	996	782	724	495.5	1	sll1600	mntB	Mn transporter MntB	mntB	ABC-type manganese transport system permease protein	996	782	214	264	0.0100272			724	495.5	228.5	0.0110667		1.10368			sll1600	mntB	ABC-type manganese transport system permease protein	0.0107967	1.07297	0.0434293	0.0107967	1.07297
slr0637	1528	783.5	1054	459.5	1	slr0637				hypothetical protein	1528	783.5	744.5	794.5	0.0301764			1054	459.5	594.5	0.0287929		0.954152			slr0637		hypothetical protein	0.0341659	0.846471	0.152284	0.0341659	0.846471
slr1262	1198	769	876	471	1	slr1262				hypothetical protein	1198	769	429	479	0.0181932			876	471	405	0.019615		1.07815			slr1262		hypothetical protein	0.0189444	1.03843	0.0561712	0.0189444	1.03843
slr0702	1059	778	702	484	1	slr0702				hypothetical protein	1059	778	281	331	0.0125719			702	484	218	0.0105582		0.839823			slr0702		hypothetical protein	0.0125132	0.885221	0.0642021	0.0125132	0.885221
sll1172	1479	782	1180	483	1	sll1172	thrC	threonine synthase	thrC	threonine synthase	1479	782	697	747	0.0283723			1180	483	697	0.0337572		1.18979			sll1172	thrC	threonine synthase	0.0285909	1.17865	0.0157565	0.0285909	1.17865
sll0282	1082	783	804	500.5	1	sll0282				hypothetical protein	1082	783	299	349	0.0132556			804	500.5	303.5	0.0146991		1.1089			sll0282		hypothetical protein	0.0141391	1.00122	0.15229	0.0141391	1.00122
sll1868	1056	773	704	502	1	sll1868	dnaG	DNA primase	dnaG	DNA primase	1056	773	283	333	0.0126479			704	502	202	0.00978329		0.773511			sll1868	dnaG	DNA primase	0.0118078	0.856303	0.117086	0.0118078	0.856303
sll0100	1163	810	796	508.5	1	sll0100	ama	N-acyl-L-amino acid amidohydrolase	ama	N-acyl-L-amino acid amidohydrolase	1163	810	353	403	0.0153066			796	508.5	287.5	0.0139242		0.909687			sll0100	ama	N-acyl-L-amino acid amidohydrolase	0.0182445	0.871012	0.054695	0.0182445	0.871012
sll0814	1886	812	1315	535	1	sll0814				hypothetical protein	1886	812	1074	1124	0.0426914			1315	535	780	0.037777		0.884887			sll0814		hypothetical protein	0.0410509	0.875727	0.0129542	0.0410509	0.875727
sll0473	1116	820	772	515.5	1	sll0473				putative ABC transport system substrate-binding protein	1116	820	296	346	0.0131417			772	515.5	256.5	0.0124228		0.945302			sll0473		putative ABC transport system substrate-binding protein	0.0134256	0.972561	0.0385491	0.0134256	0.972561
slr2119	1284	860.5	891	511	1	slr2119				hypothetical protein	1284	860.5	423.5	473.5	0.0179843			891	511	380	0.0184042		1.02335			slr2119		hypothetical protein	0.0183668	0.970831	0.0742689	0.0183668	0.970831
slr0079	1457	849.5	897	524.5	1	slr0079	gspE	general secretion pathway protein E	gspE2, pilB2	general secretion pathway protein E	1457	849.5	607.5	657.5	0.0249729			897	524.5	372.5	0.018041		0.72242			slr0079	gspE2, pilB2	general secretion pathway protein E	0.0231066	0.783536	0.0864301	0.0231066	0.783536
slr1506	2386	837	1258	500	1	slr1506				hypothetical protein	2386	837	1549	1599	0.0607327			1258	500	758	0.0367115		0.604478			slr1506		hypothetical protein	0.0539141	0.611651	0.0101447	0.0539141	0.611651
slr0559	1338	820	926	508	1	slr0559			natB	ABC-type neutral amino acid transport system substrate-binding protein	1338	820	518	568	0.0215736			926	508	418	0.0202446		0.938399			slr0559	natB	ABC-type neutral amino acid transport system substrate-binding protein	0.0212042	0.863814	0.105479	0.0212042	0.863814
slr0264	1284	841	910	519.5	1	slr0264		hypothetical protein		hypothetical protein	1284	841	443	493	0.018725			910	519.5	390.5	0.0189127		1.01003			slr0264		hypothetical protein	0.0177814	0.980273	0.0420801	0.0177814	0.980273
slr0197	1263	840.5	882	531	1	slr0197		comE ORF1	comA	competence protein	1263	840.5	422.5	472.5	0.0179463			882	531	351	0.0169997		0.94725			slr0197	comA	competence protein	0.0186278	0.922809	0.0345647	0.0186278	0.922809
sll1905	1234	855.5	775	494.5	1	sll1905		sensory transduction histidine kinase	hik19	two-component hybrid histidine kinase	1234	855.5	378.5	428.5	0.0162751			775	494.5	280.5	0.0135852		0.834721			sll1905	hik19	two-component hybrid histidine kinase	0.0148958	0.811734	0.0325094	0.0148958	0.811734
sll0680	1746	832	1339	497	1	sll0680	pstS or phoS	phosphate-binding periplasmic protein precursor (PBP)	pstS, phoS	ABC-type phosphate transport system substrate-binding protein	1746	832	914	964	0.0366143			1339	497	842	0.0407798		1.11377			sll0680	pstS, phoS	ABC-type phosphate transport system substrate-binding protein	0.0320265	1.0508	0.0890541	0.0320265	1.0508
slr0863	1335	826.5	979	510	1	slr0863		hypothetical protein		hypothetical protein	1335	826.5	508.5	558.5	0.0212128			979	510	469	0.0227147		1.0708			slr0863		hypothetical protein	0.0185425	1.04445	0.0372703	0.0185425	1.04445
slr1920	1158.5	855	753.5	481	1	slr1920				hypothetical protein	1158.5	855	303.5	353.5	0.0134265			753.5	481	272.5	0.0131977		0.982961			slr1920		hypothetical protein	0.0111158	0.913646	0.0980264	0.0111158	0.913646
sll1496	1235	824	825	512.5	1	sll1496		mannose-1-phosphate guanyltransferase		mannose-1-phosphate guanylyltransferase / phosphomannomutase	1235	824	411	461	0.0175095			825	512.5	312.5	0.015135		0.864388			sll1496		mannose-1-phosphate guanylyltransferase / phosphomannomutase	0.0144124	0.866787	0.00339273	0.0144124	0.866787
sll1945	2292	851	1488	493.5	1	sll1945		hypothetical protein	dxs	probable 1-deoxyxylulose-5-phosphate synthase	2292	851	1441	1491	0.0566307			1488	493.5	994.5	0.0481657		0.850524			sll1945	dxs	probable 1-deoxyxylulose-5-phosphate synthase	0.0439173	0.904247	0.0759765	0.0439173	0.904247
slr1429	1197	859.5	815	484.5	1	slr1429				hypothetical protein	1197	859.5	337.5	387.5	0.0147179			815	484.5	330.5	0.0160068		1.08757			slr1429		hypothetical protein	0.0122442	0.950657	0.193631	0.0122442	0.950657
sll1502	2163	765	1162	457	1	sll1502	gltB	glutamate synthase (ferredoxin)	gltB	NADH-dependent glutamate synthase large subunit	2163	765	1398	1448	0.0549974			1162	457	705	0.0341446		0.62084			sll1502	gltB	NADH-dependent glutamate synthase large subunit	0.060006	0.645726	0.0351942	0.060006	0.645726
sll0509	1176	787.5	800	448.5	1	sll0509		Ap-4-A phosphorylase II		Ap-4-A phosphorylase II	1176	787.5	388.5	438.5	0.016655			800	448.5	351.5	0.0170239		1.02215			sll0509		Ap-4-A phosphorylase II	0.0175284	0.949447	0.102819	0.0175284	0.949447
slr1085	1413	782	894	468.5	1	slr1085				hypothetical protein	1413	782	631	681	0.0258655			894	468.5	425.5	0.0206079		0.796731			slr1085		hypothetical protein	0.0282547	0.795969	0.00107778	0.0282547	0.795969
sll0030	948.5	767	645.5	460	1	sll0030	rbcR	rubisco operon transcriptional regulator	cmpR	cmp operon transcriptional regulator, LysR family protein	948.5	767	181.5	231.5	0.00879275			645.5	460	185.5	0.00898416		1.02177			sll0030	cmpR	cmp operon transcriptional regulator, LysR family protein	0.00778517	1.15836	0.193177	0.00778517	1.15836
slr0964	1464	772.5	1207	476	1	slr0964		hypothetical protein		hypothetical protein	1464	772.5	691.5	741.5	0.0281634			1207	476	731	0.0354039		1.25709			slr0964		hypothetical protein	0.0310546	1.25135	0.00811992	0.0310546	1.25135
sll0797	970	738.5	648	460	1	sll0797		regulatory components of sensory transduction system	nrsR, rppA, rre33	redox-responsive and/or Ni(II)-responsive regulator, two-component response regulator (OmpR subfamily)	970	738.5	231.5	281.5	0.0106918			648	460	188	0.00910524		0.851606			sll0797	nrsR, rppA, rre33	redox-responsive and/or Ni(II)-responsive regulator, two-component response regulator (OmpR subfamily)	0.00869609	0.90738	0.0788761	0.00869609	0.90738
slr1774	1074	748	735.5	473	1	slr1774				hypothetical protein	1074	748	326	376	0.0142811			735.5	473	262.5	0.0127134		0.890227			slr1774		hypothetical protein	0.0147871	0.899173	0.0126506	0.0147871	0.899173
sll0096	1139	773.5	690	447	1	sll0096				hypothetical protein	1139	773.5	365.5	415.5	0.0157814			690	447	243	0.011769		0.745752			sll0096		hypothetical protein	0.0157689	0.805389	0.0843388	0.0157689	0.805389
sll1319	994	787.5	683	460.5	1	sll1319				hypothetical protein	994	787.5	206.5	256.5	0.0097423			683	460.5	222.5	0.0107761		1.10612			sll1319		hypothetical protein	0.010664	0.983082	0.174001	0.010664	0.983082
slr0521	1022	765	767	498	1	slr0521				hypothetical protein	1022	765	257	307	0.0116604			767	498	269	0.0130282		1.11731			slr0521		hypothetical protein	0.0117388	1.10694	0.0146628	0.0117388	1.10694
sll0225	1077	790	731	507	1	sll0225				hypothetical protein	1077	790	287	337	0.0127998			731	507	224	0.0108488		0.847574			sll0225		hypothetical protein	0.0135733	0.945575	0.138595	0.0135733	0.945575
slr0075	1398	778	1488	471.5	1	slr0075	ycf16	ABC transporter subunit	ycf16	probable ATP-dependent transporter subunit	1398	778	620	670	0.0254477			1488	471.5	1016.5	0.0492312		1.9346			slr0075	ycf16	probable ATP-dependent transporter subunit	0.0268197	1.81016	0.175985	0.0268197	1.81016
slr2053	1340	765.5	920	502.5	1	slr2053				hypothetical protein	1340	765.5	574.5	624.5	0.0237195			920	502.5	417.5	0.0202204		0.852479			slr2053		hypothetical protein	0.0247391	0.837619	0.0210151	0.0247391	0.837619
slr0659	1919	799.5	1198	480	1	slr0659	prlC or opdA	oligopeptidase A	prlC, opdA	oligopeptidase A	1919	799.5	1119.5	1169.5	0.0444196			1198	480	718	0.0347743		0.782859			slr0659	prlC, opdA	oligopeptidase A	0.0436818	0.784252	0.00196941	0.0436818	0.784252
sll1001	1190	843.5	799	469	1	sll1001		ABC transporter		ABC transporter ATP-binding protein	1190	843.5	346.5	396.5	0.0150597			799	469	330	0.0159826		1.06128			sll1001		ABC transporter ATP-binding protein	0.0154177	1.00435	0.0805128	0.0154177	1.00435
sll0535	1631	798.5	1121	487	1	sll0535	clpX	ATP-dependent protease ATPase subunit	clpX	ATP-dependent Clp protease ATPase subunit	1631	798.5	832.5	882.5	0.0335188			1121	487	634	0.030706		0.916081			sll0535	clpX	ATP-dependent Clp protease ATPase subunit	0.0326607	0.824114	0.130061	0.0326607	0.824114
sll0635	1424	822	1049	512	1	sll0635	thiE	thiamin biosynthetic bifunctional enzyme	thiE	thiamin-phosphate pyrophosphorylase	1424	822	602	652	0.024764			1049	512	537	0.026008		1.05023			sll0635	thiE	thiamin-phosphate pyrophosphorylase	0.0233304	1.05444	0.00594414	0.0233304	1.05444
slr0529	1165	789	790	484.5	1	slr0529			ggtB	ABC-type glucosylglycerol transport system substrate-binding protein	1165	789	376	426	0.0161802			790	484.5	305.5	0.014796		0.914452			slr0529	ggtB	ABC-type glucosylglycerol transport system substrate-binding protein	0.0149256	0.89246	0.0311015	0.0149256	0.89246
slr0983	1785	847	1091	543	1	slr0983	rfbF	alpha-D-glucose-1-phosphate cytidylyltransferase	rfbF	alpha-D-glucose-1-phosphate cytidylyltransferase	1785	847	938	988	0.0375259			1091	543	548	0.0265408		0.707266			slr0983	rfbF	alpha-D-glucose-1-phosphate cytidylyltransferase	0.0318836	0.76679	0.0841792	0.0318836	0.76679
sll0782	1018	856	663	517	1	sll0782		putative protein kinase		protein kinase	1018	856	162	212	0.00805211			663	517	146	0.00707109		0.878166			sll0782		protein kinase	0.00771414	0.834541	0.0616949	0.00771414	0.834541
sll1200	1167	811.5	760	517	1	sll1200				hypothetical protein	1167	811.5	355.5	405.5	0.0154016			760	517	243	0.011769		0.764143			sll1200		hypothetical protein	0.0149032	0.83008	0.0932489	0.0149032	0.83008
slr0303	1443	839	993	492.5	1	slr0303				hypothetical protein	1443	839	604	654	0.02484			993	492.5	500.5	0.0242403		0.975856			slr0303		hypothetical protein	0.021785	0.920684	0.078025	0.021785	0.920684
sll1036	1217	844	836	498	1	sll1036				hypothetical protein	1217	844	373	423	0.0160662			836	498	338	0.0163701		1.01891			sll1036		hypothetical protein	0.0145307	1.04281	0.0337964	0.0145307	1.04281
sll0590	1095	832.5	672	477	1	sll0590				hypothetical protein	1095	832.5	262.5	312.5	0.0118693			672	477	195	0.00944426		0.79569			sll0590		hypothetical protein	0.0100668	0.888234	0.130877	0.0100668	0.888234
sll0217	2110	843	2546	509	1	sll0217		potential FMN-protein		potential FMN-protein	2110	843	1267	1317	0.0500218			2546	509	2037	0.0986562		1.97226			sll0217		potential FMN-protein	0.0443203	1.92962	0.0603075	0.0443203	1.92962
slr0088	1115	842.5	772	481	1	slr0088	crtE	phytoene dehydrogenase	crtO	beta-carotene ketolase	1115	842.5	272.5	322.5	0.0122491			772	481	291	0.0140937		1.1506			slr0088	crtO	beta-carotene ketolase	0.0119849	1.0323	0.167301	0.0119849	1.0323
slr1129	2448	837.5	1360	508	1	slr1129	rne	ribonuclease E	rne	ribonuclease E	2448	837.5	1610.5	1660.5	0.0630685			1360	508	852	0.0412642		0.654275			slr1129	rne	ribonuclease E	0.049492	0.691539	0.0526995	0.049492	0.691539
sll0827	1149	831.5	735	505	1	sll0827				hypothetical protein	1149	831.5	317.5	367.5	0.0139583			735	505	230	0.0111394		0.79805			sll0827		hypothetical protein	0.0115651	0.763494	0.0488684	0.0115651	0.763494
slr0292	1266	867.5	882	511	1	slr0292				hypothetical protein	1266	867.5	398.5	448.5	0.0170348			882	511	371	0.0179683		1.0548			slr0292		hypothetical protein	0.0149571	0.95732	0.13786	0.0149571	0.95732
sll1833	1890	859.5	1136	486.5	1	sll1833	ftsI or pbpB	penicillin-binding protein	ftsI, pbpB	penicillin-binding protein	1890	859.5	1030.5	1080.5	0.0410392			1136	486.5	649.5	0.0314567		0.766503			sll1833	ftsI, pbpB	penicillin-binding protein	0.0327424	0.759177	0.0103609	0.0327424	0.759177
slr0953	1496	763.5	1187	479.5	1	slr0953				hypothetical protein	1496	763.5	732.5	782.5	0.0297207			1187	479.5	707.5	0.0342657		1.15293			slr0953		hypothetical protein	0.030723	1.11145	0.0586558	0.030723	1.11145
sll1003	1035	799.5	682	440.5	1	sll1003		sensory transduction histidine kinase	hik13	two-component sensor histidine kinase	1035	799.5	235.5	285.5	0.0108438			682	440.5	241.5	0.0116964		1.07862			sll1003	hik13	two-component sensor histidine kinase	0.0106933	0.988604	0.127308	0.0106933	0.988604
slr1163	1429	804	1088	478	1	slr1163				hypothetical protein	1429	804	625	675	0.0256376			1088	478	610	0.0295436		1.15235			slr1163		hypothetical protein	0.027407	1.13136	0.0296923	0.027407	1.13136
slr1594	1127	790.5	701	457.5	1	slr1594	patA	PatA protein	rre5	two-component response regulator (PatA subfamily)	1127	790.5	336.5	386.5	0.0146799			701	457.5	243.5	0.0117932		0.803358			slr1594	rre5	two-component response regulator (PatA subfamily)	0.0154402	0.778516	0.0351306	0.0154402	0.778516
slr1476	1678	795.5	1432	478.5	1	slr1476	pyrB	aspartate carbamoyltransferase	pyrB	aspartate carbamoyltransferase catalytic chain	1678	795.5	882.5	932.5	0.0354179			1432	478.5	953.5	0.04618		1.30386			slr1476	pyrB	aspartate carbamoyltransferase catalytic chain	0.0399919	1.24593	0.0819288	0.0399919	1.24593
sll1019	1113	755	822	463	1	sll1019	HAGH1	glyoxalase II	gloB	glyoxalase II	1113	755	358	408	0.0154965			822	463	359	0.0173871		1.122			sll1019	gloB	glyoxalase II	0.0174995	1.00574	0.164423	0.0174995	1.00574
slr1349	1766	764.5	1200	469	1	slr1349	pgi	glucose-6-phosphate isomerase	pgi	glucose-6-phosphate isomerase	1766	764.5	1001.5	1051.5	0.0399377			1200	469	731	0.0354039		0.886477			slr1349	pgi	glucose-6-phosphate isomerase	0.0435166	0.80801	0.110969	0.0435166	0.80801
slr1301	1702	785.5	1716	468.5	1	slr1301				hypothetical protein	1702	785.5	916.5	966.5	0.0367093			1716	468.5	1247.5	0.0604191		1.64588			slr1301		hypothetical protein	0.0409659	1.57471	0.100652	0.0409659	1.57471
sll1221	1281	778	853	485	1	sll1221	hoxF	hydrogenase subunit	hoxF	diaphorase subunit of the bidirectional hydrogenase	1281	778	503	553	0.0210039			853	485	368	0.017823		0.848559			sll1221	hoxF	diaphorase subunit of the bidirectional hydrogenase	0.021991	0.82309	0.0360187	0.021991	0.82309
slr1788	998	759.5	699	491	1	slr1788				hypothetical protein	998	759.5	238.5	288.5	0.0109577			699	491	208	0.0100739		0.919342			slr1788		hypothetical protein	0.0121985	0.860152	0.083707	0.0121985	0.860152
sll1981	1717	780.5	1177	479.5	1	sll1981	ilvB	acetolactate synthase	ilvB	acetolactate synthase large subunit	1717	780.5	936.5	986.5	0.0374689			1177	479.5	697.5	0.0337814		0.901585			sll1981	ilvB	acetolactate synthase large subunit	0.0378893	0.928867	0.0385833	0.0378893	0.928867
sll0698	1293	762.5	861	514	1	sll0698	dfr	drug sensory protein A	dspA, dfr, hik33, nblS	drug sensory protein A, low temperature sensor, two-component sensor histidine kinase	1293	762.5	530.5	580.5	0.0220484			861	514	347	0.0168059		0.762231			sll0698	dspA, dfr, hik33, nblS	drug sensory protein A, low temperature sensor, two-component sensor histidine kinase	0.0220112	0.84044	0.110604	0.0220112	0.84044
sll1615	1142	773	867	506	1	sll1615	thdF or trmE	thiophen and furan oxidation protein	thdF, trmE	thiophene and furan oxidation protein	1142	773	369	419	0.0159143			867	506	361	0.017484		1.09863			sll1615	thdF, trmE	thiophene and furan oxidation protein	0.0163567	1.06792	0.0434275	0.0163567	1.06792
sll1397	3150	822.5	2933	507.5	1	sll1397		transposase	ISY100a	putative transposase gene of IS630 family insertion sequence ISY100a	3150	822.5	2327.5	2377.5	0.0903014			2933	507.5	2425.5	0.117472		1.30089			sll1397	ISY100a	putative transposase gene of IS630 family insertion sequence ISY100a	0.0893208	1.26379	0.0524631	0.0893208	1.26379
sll0421	1852	840	1394	526	1	sll0421	purB	adenylosuccinate lyase	purB	adenylosuccinate lyase	1852	840	1012	1062	0.0403365			1394	526	868	0.0420391		1.04221			sll0421	purB	adenylosuccinate lyase	0.0381742	0.967321	0.105907	0.0381742	0.967321
sll1750	2254	825	1286	502.5	1	sll1750	ureC	urease alpha subunit	ureC	urease alpha subunit	2254	825	1429	1479	0.0561749			1286	502.5	783.5	0.0379466		0.675508			sll1750	ureC	urease alpha subunit	0.0504477	0.664464	0.0156176	0.0504477	0.664464
slr1693	1968	847.5	1277	504	1	slr1693		regulatory components of sensory transduction system	rre24	two-component response regulator (PatA subfamily)	1968	847.5	1120.5	1170.5	0.0444575			1277	504	773	0.037438		0.842107			slr1693	rre24	two-component response regulator (PatA subfamily)	0.0415381	0.826456	0.0221347	0.0415381	0.826456
slr1048	1128.5	809.5	762.5	497.5	1	slr1048				hypothetical protein	1128.5	809.5	319	369	0.0140152			762.5	497.5	265	0.0128345		0.915754			slr1048		hypothetical protein	0.0142197	0.884705	0.04391	0.0142197	0.884705
sll1174	1201	874.5	813	494	1	sll1174				hypothetical protein	1201	874.5	326.5	376.5	0.0143001			813	494	319	0.0154498		1.0804			sll1174		hypothetical protein	0.01442	0.958302	0.172675	0.01442	0.958302
slr0687	1142	857	769	508	1	slr0687	pleD	PleD gene product	pleD	PleD gene product	1142	857	285	335	0.0127239			769	508	261	0.0126408		0.993471			slr0687	pleD	PleD gene product	0.0134967	0.916425	0.108959	0.0134967	0.916425
sll1898	2168	846	1231	491.5	1	sll1898				hypothetical protein	2168	846	1322	1372	0.0521108			1231	491.5	739.5	0.0358155		0.687295			sll1898		hypothetical protein	0.045442	0.697169	0.0139638	0.045442	0.697169
slr1064	1486	839.5	1029	525	1	slr1064	rfbU or mtfA	mannosyltransferase B	rfbU, mtfA	mannosyltransferase B	1486	839.5	646.5	696.5	0.0264542			1029	525	504	0.0244098		0.922718			slr1064	rfbU, mtfA	mannosyltransferase B	0.0231618	0.909576	0.0185845	0.0231618	0.909576
slr0817	1202	841.5	788	486	1	slr0817	entC	isochorismate synthase	menF, entC	isochorismate synthase	1202	841.5	360.5	410.5	0.0155915			788	486	302	0.0146265		0.938109			slr0817	menF, entC	isochorismate synthase	0.0147374	0.878107	0.0848556	0.0147374	0.878107
sll1667	1869	867	1307	496.5	1	sll1667	mom72	mitochondrial outer membrane 72K protein	mom72	periplasmic protein, similar to mitochondrial outer membrane 72K protein	1869	867	1002	1052	0.0399567			1307	496.5	810.5	0.0392542		0.982419			sll1667	mom72	periplasmic protein, similar to mitochondrial outer membrane 72K protein	0.0343445	0.988039	0.00794796	0.0343445	0.988039
slr2123	1371	834	1012	499.5	1	slr2123		D-isomer specific 2-hydroxyacid dehydrogenase family		D-isomer specific 2-hydroxyacid dehydrogenase family	1371	834	537	587	0.0222952			1012	499.5	512.5	0.0248215		1.11331			slr2123		D-isomer specific 2-hydroxyacid dehydrogenase family	0.0190741	1.09075	0.0319076	0.0190741	1.09075
sll1041	1219	854.5	849	505.5	1	sll1041		ABC transporter		ABC transporter ATP-binding protein	1219	854.5	364.5	414.5	0.0157434			849	505.5	343.5	0.0166364		1.05672			sll1041		ABC transporter ATP-binding protein	0.0146203	1.00554	0.0723881	0.0146203	1.00554
slr1728	1464	831	881	490	1	slr1728	kdpA	potassium-transporting ATPase A chain	kdpA	potassium-transporting ATPase A chain	1464	831	633	683	0.0259415			881	490	391	0.018937		0.729988			slr1728	kdpA	potassium-transporting ATPase A chain	0.0208876	0.730184	0.000278029	0.0208876	0.730184
slr1125	1403	860.5	935	489.5	1	slr1125	crtX	zeaxanthin glucosyl transferase		zeaxanthin glucosyl transferase, hypothetical protein	1403	860.5	542.5	592.5	0.0225041			935	489.5	445.5	0.0215765		0.95878			slr1125		zeaxanthin glucosyl transferase, hypothetical protein	0.0185993	0.878163	0.114009	0.0185993	0.878163
sll1151	1398	892	835	473	1	sll1151				hypothetical protein	1398	892	506	556	0.0211178			835	473	362	0.0175324		0.83022			sll1151		hypothetical protein	0.0173751	0.827907	0.0032705	0.0173751	0.827907
sll1409	1189	822	690.5	494.5	1	sll1409	fhuA	ferrichrome-iron receptor	fhuA	ferrichrome-iron receptor.	1189	822	367	417	0.0158384			690.5	494.5	196	0.00949269		0.599348			sll1409	fhuA	ferrichrome-iron receptor.	0.0125341	0.671645	0.102243	0.0125341	0.671645
slr0757	991	864	631	489	1	slr0757			kaiB1	circadian clock protein KaiB homolog	991	864	127	177	0.00672275			631	489	142	0.00687736		1.023			slr0757	kaiB1	circadian clock protein KaiB homolog	0.0071267	0.792582	0.325857	0.0071267	0.792582
sll0486	1260	860.5	738	507	1	sll0486			kaiB3	circadian clock protein KaiB homolog	1260	860.5	399.5	449.5	0.0170728			738	507	231	0.0111878		0.655302			sll0486	kaiB3	circadian clock protein KaiB homolog	0.0143581	0.776596	0.171535	0.0143581	0.776596
sll1092	1165.5	860	736	515	1	sll1092				hypothetical protein	1165.5	860	305.5	355.5	0.0135025			736	515	221	0.0107035		0.792706			sll1092		hypothetical protein	0.0123316	0.769887	0.0322712	0.0123316	0.769887
slr1839	1371	882	960	487	1	slr1839	ccmK	carbon dioxide concentrating mechanism protein CcmK	ccmK4	carbon dioxide concentrating mechanism protein CcmK homolog 4, putative carboxysome assembly protein	1371	882	489	539	0.0204721			960	487	473	0.0229084		1.119			slr1839	ccmK4	carbon dioxide concentrating mechanism protein CcmK homolog 4, putative carboxysome assembly protein	0.0174771	1.09514	0.0337543	0.0174771	1.09514
sll0522	1939	817	1192	470	1	sll0522	ndhE	NADH dehydrogenase subunit 5	ndhE	NADH dehydrogenase I chain K	1939	817	1122	1172	0.0445145			1192	470	722	0.034968		0.785541			sll0522	ndhE	NADH dehydrogenase I chain K	0.0464519	0.732053	0.0756439	0.0464519	0.732053
slr0581	1349	792	2825	484	1	slr0581				hypothetical protein	1349	792	557	607	0.0230549			2825	484	2341	0.11338		4.91781			slr0581		hypothetical protein	0.0263667	4.53117	0.546802	0.0263667	4.53117
slr0284	1234	779	888	496	1	slr0284		hypothetical protein		hypothetical protein	1234	779	455	505	0.0191807			888	496	392	0.0189854		0.989815			slr0284		hypothetical protein	0.0191871	0.950165	0.0560732	0.0191871	0.950165
sll1911	1213	819.5	1032	508	1	sll1911				hypothetical protein	1213	819.5	393.5	443.5	0.0168449			1032	508	524	0.0253784		1.5066			sll1911		hypothetical protein	0.0162331	1.49609	0.0148605	0.0162331	1.49609
slr1838	1445	832.5	971	496.5	1	slr1838	ccmK	carbon dioxide concentrating mechanism protein CcmK	ccmK3	carbon dioxide concentrating mechanism protein CcmK homolog 3, putative carboxysome assembly protein	1445	832.5	612.5	662.5	0.0251629			971	496.5	474.5	0.022981		0.913292			slr1838	ccmK3	carbon dioxide concentrating mechanism protein CcmK homolog 3, putative carboxysome assembly protein	0.0241091	0.91794	0.0065735	0.0241091	0.91794
sll1796	1372	832.5	1088	496	1	sll1796	petJ	cytochrome c553	petJ	cytochrome c553	1372	832.5	539.5	589.5	0.0223902			1088	496	592	0.0286718		1.28055			sll1796	petJ	cytochrome c553	0.0215739	1.24839	0.045483	0.0215739	1.24839
sll0863	1145	862.5	690.5	489.5	1	sll0863				hypothetical protein	1145	862.5	282.5	332.5	0.0126289			690.5	489.5	201	0.00973485		0.770839			sll0863		hypothetical protein	0.0124452	0.854899	0.118878	0.0124452	0.854899
ssr2803	1063	826	680	464	1	ssr2803		hypothetical protein		hypothetical protein	1063	826	237	287	0.0109007			680	464	216	0.0104613		0.959691			ssr2803		hypothetical protein	0.0107025	0.956592	0.00438166	0.0107025	0.956592
slr0164	7858	821	5785	484	1	slr0164	clpP	ATP-dependent Clp protease proteolytic subunit	clpP4, clpR	ATP-dependent Clp protease, Clp-like subunit, the predicted protein for this gene lacks the active site motifs characteristic of ClpP proteases	7858	821	7037	7087	0.269176			5785	484	5301	0.256739		0.953794			slr0164	clpP4, clpR	ATP-dependent Clp protease, Clp-like subunit, the predicted protein for this gene lacks the active site motifs characteristic of ClpP proteases	0.235431	0.938814	0.0211857	0.235431	0.938814
slr1210	1062	823	714	493.5	1	slr1210				hypothetical protein	1062	823	239	289	0.0109767			714	493.5	220.5	0.0106793		0.972904			slr1210		hypothetical protein	0.0113005	0.92615	0.0661213	0.0113005	0.92615
slr0773	1391	836.5	912	478.5	1	slr0773				hypothetical protein	1391	836.5	554.5	604.5	0.0229599			912	478.5	433.5	0.0209953		0.914434			slr0773		hypothetical protein	0.0214146	0.830731	0.118373	0.0214146	0.830731
ssr2130	1542	836	998	498	1	ssr2130				hypothetical protein	1542	836	706	756	0.0287141			998	498	500	0.0242161		0.84335			ssr2130		hypothetical protein	0.0271205	0.780665	0.08865	0.0271205	0.780665
slr1546	2430	872.5	1448	510	1	slr1546				hypothetical protein	2430	872.5	1557.5	1607.5	0.0610555			1448	510	938	0.0454293		0.744066			slr1546		hypothetical protein	0.0529556	0.693155	0.0719987	0.0529556	0.693155
slr0810	1155	874	752.5	499.5	1	slr0810				hypothetical protein	1155	874	281	331	0.0125719			752.5	499.5	253	0.0122533		0.974657			slr0810		hypothetical protein	0.0118084	1.01553	0.0577994	0.0118084	1.01553
sll1054	1400	849.5	879	492	1	sll1054		hypothetical protein		hypothetical protein	1400	849.5	550.5	600.5	0.022808			879	492	387	0.0187432		0.821783			sll1054		hypothetical protein	0.0195718	0.839129	0.0245298	0.0195718	0.839129
sll1811	3662	873	3218	507	1	sll1811	rpl18	50S ribosomal protein L18	rplR, rpl18	50S ribosomal protein L18	3662	873	2789	2839	0.10783			3218	507	2711	0.131299		1.21765			sll1811	rplR, rpl18	50S ribosomal protein L18	0.0854664	1.24003	0.0316451	0.0854664	1.24003
slr1204	1203	863.5	1620	510.5	1	slr1204	htrA	serine protease HtrA	htrA	serine protease HtrA	1203	863.5	339.5	389.5	0.0147939			1620	510.5	1109.5	0.0537354		3.63228			slr1204	htrA	serine protease HtrA	0.0147731	2.75316	1.24326	0.0147731	2.75316
ssl0294	1351	876.5	866	517	1	ssl0294				hypothetical protein	1351	876.5	474.5	524.5	0.0199214			866	517	349	0.0169028		0.848476			ssl0294		hypothetical protein	0.0178099	0.915077	0.0941882	0.0178099	0.915077
slr1829	2136	892.5	1190	486	1	slr1829			phaE	putative poly(3-hydroxyalkanoate) synthase component	2136	892.5	1243.5	1293.5	0.0491293			1190	486	704	0.0340962		0.69401			slr1829	phaE	putative poly(3-hydroxyalkanoate) synthase component	0.0360151	0.698691	0.00662002	0.0360151	0.698691
sll1155	1699	887.5	1163	500	1	sll1155				hypothetical protein	1699	887.5	811.5	861.5	0.0327212			1163	500	663	0.0321105		0.981336			sll1155		hypothetical protein	0.0260539	0.992655	0.0160081	0.0260539	0.992655
slr1348	1584	850	997	472	1	slr1348	cysE	serine acetyltransferase	cysE	serine acetyltransferase	1584	850	734	784	0.0297776			997	472	525	0.0254269		0.853891			slr1348	cysE	serine acetyltransferase	0.022796	0.81217	0.0590035	0.022796	0.81217
slr0664	1035	755.5	650	450	1	slr0664				hypothetical protein	1035	755.5	279.5	329.5	0.012515			650	450	200	0.00968642		0.773988			slr0664		hypothetical protein	0.0106214	0.978524	0.289258	0.0106214	0.978524
slr1338	1260	791	831	443	1	slr1338				hypothetical protein	1260	791	469	519	0.0197125			831	443	388	0.0187917		0.953287			slr1338		hypothetical protein	0.0232569	0.946663	0.00936846	0.0232569	0.946663
sll1239	966	754	630	471.5	1	sll1239				hypothetical protein	966	754	212	262	0.0099512			630	471.5	158.5	0.00767649		0.771414			sll1239		hypothetical protein	0.00996706	0.856322	0.120079	0.00996706	0.856322
slr0342	3477	785.5	2490	445.5	1	slr0342	petB	cytochrome b6	petB	cytochrome b6	3477	785.5	2691.5	2741.5	0.104127			2490	445.5	2044.5	0.0990194		0.950951			slr0342	petB	cytochrome b6	0.11897	0.92476	0.0370399	0.11897	0.92476
ssr2554	2090	793.5	1072	445.5	1	ssr2554				hypothetical protein	2090	793.5	1296.5	1346.5	0.0511423			1072	445.5	626.5	0.0303427		0.5933			ssr2554		hypothetical protein	0.0543711	0.594227	0.0013118	0.0543711	0.594227
slr2041	1150	815	865	487	1	slr2041	divK	cell division response regulator DivK	divK	cell division response regulator DivK	1150	815	335	385	0.0146229			865	487	378	0.0183073		1.25196			slr2041	divK	cell division response regulator DivK	0.0163482	1.12659	0.177304	0.0163482	1.12659
sll0811	1032	796	682	468	1	sll0811				hypothetical protein	1032	796	236	286	0.0108628			682	468	214	0.0103645		0.954129			sll0811		hypothetical protein	0.0123055	0.922058	0.0453555	0.0123055	0.922058
sll1708	1169	760	823	477	1	sll1708	narL or frdR	nitrate/nitrite response regulator protein	rre17, narL	two-component response regulator (NarL subfamily)	1169	760	409	459	0.0174336			823	477	346	0.0167575		0.96122			sll1708	rre17, narL	two-component response regulator (NarL subfamily)	0.0179853	0.980539	0.0273212	0.0179853	0.980539
ssr2857	1088	774	711	476	1	ssr2857			atx1	copper metallochaperone	1088	774	314	364	0.0138253			711	476	235	0.0113815		0.823239			ssr2857	atx1	copper metallochaperone	0.0134199	0.908478	0.120547	0.0134199	0.908478
slr0109	1038	752.5	712	504.5	1	slr0109				hypothetical protein	1038	752.5	285.5	335.5	0.0127428			712	504.5	207.5	0.0100497		0.788651			slr0109		hypothetical protein	0.0120098	0.857876	0.0978992	0.0120098	0.857876
sll0426	2080	787	1085	498	1	sll0426				hypothetical protein	2080	787	1293	1343	0.0510094			1085	498	587	0.0284296		0.557342			sll0426		hypothetical protein	0.0478649	0.558337	0.00140804	0.0478649	0.558337
slr0644	1125	800	767	490	1	slr0644		hypothetical protein		hypothetical protein	1125	800	325	375	0.0142431			767	490	277	0.0134157		0.941907			slr0644		hypothetical protein	0.0142564	0.868935	0.103197	0.0142564	0.868935
ssr1398	3036	807.5	2637	503.5	1	ssr1398	rpl33	50S ribosomal protein L33	rpmG, rpl33	50S ribosomal protein L33	3036	807.5	2228.5	2278.5	0.0865412			2637	503.5	2133.5	0.10333		1.194			ssr1398	rpmG, rpl33	50S ribosomal protein L33	0.0828644	1.16877	0.0356713	0.0828644	1.16877
slr0351	1312	822	869	483	1	slr0351				hypothetical protein	1312	822	490	540	0.0205101			869	483	386	0.0186948		0.911492			slr0351		hypothetical protein	0.0193304	0.89378	0.0250484	0.0193304	0.89378
ssr2406	1099	829	781	480.5	1	ssr2406				hypothetical protein	1099	829	270	320	0.0121541			781	480.5	300.5	0.0145538		1.19744			ssr2406		hypothetical protein	0.0121981	1.11322	0.119105	0.0121981	1.11322
sll1039	1486	867	894	498.5	1	sll1039		hypothetical protein		hypothetical protein	1486	867	619	669	0.0254097			894	498.5	395.5	0.0191549		0.753841			sll1039		hypothetical protein	0.0221471	0.814338	0.0855558	0.0221471	0.814338
sll1885	1419	857	882	516.5	1	sll1885				hypothetical protein	1419	857	562	612	0.0232448			882	516.5	365.5	0.0177019		0.761545			sll1885		hypothetical protein	0.0215957	0.785841	0.0343609	0.0215957	0.785841
sll1400	1082.5	845.5	700	501	1	sll1400				hypothetical protein	1082.5	845.5	237	287	0.0109007			700	501	199	0.00963799		0.884159			sll1400		hypothetical protein	0.00996876	0.950543	0.0938801	0.00996876	0.950543
slr0229	1429	836	901	490.5	1	slr0229	mmsB	3-hydroxyisobutyrate dehydrogenase	mmsB	3-hydroxyisobutyrate dehydrogenase	1429	836	593	643	0.0244222			901	490.5	410.5	0.0198814		0.81407			slr0229	mmsB	3-hydroxyisobutyrate dehydrogenase	0.0207458	0.839548	0.0360312	0.0207458	0.839548
ssl0738	1055	828	705	509	1	ssl0738				hypothetical protein	1055	828	227	277	0.0105209			705	509	196	0.00949269		0.902268			ssl0738		hypothetical protein	0.0108795	0.954179	0.0734121	0.0108795	0.954179
slr1564	1788	860	1087	488	1	slr1564	rpoF	RNA polymerase sigma-37	sigF, rpoF	RNA polymerase sigma factor, alternative sigma (group 3)	1788	860	928	978	0.0371461			1087	488	599	0.0290108		0.780993			slr1564	sigF, rpoF	RNA polymerase sigma factor, alternative sigma (group 3)	0.0326978	0.743672	0.0527804	0.0326978	0.743672
ssr3341	1342	844.5	880	514	1	ssr3341				hypothetical protein	1342	844.5	497.5	547.5	0.020795			880	514	366	0.0177262		0.852425			ssr3341		hypothetical protein	0.019357	0.763308	0.126031	0.019357	0.763308
slr1803	1174	864	827	500	1	slr1803	mbpA	adenine-specific DNA metylase	mbpA	adenine-specific DNA methylase	1174	864	310	360	0.0136734			827	500	327	0.0158373		1.15826			slr1803	mbpA	adenine-specific DNA methylase	0.0130833	1.09052	0.0957898	0.0130833	1.09052
ssr2060	1258	869.5	803	504.5	1	ssr2060				hypothetical protein	1258	869.5	388.5	438.5	0.016655			803	504.5	298.5	0.014457		0.868029			ssr2060		hypothetical protein	0.0154816	0.863396	0.00655111	0.0154816	0.863396
slr1272	7288	869.5	2882	490.5	1	slr1272				S-layer homology domain containing protein	7288	869.5	6418.5	6468.5	0.245684			2882	490.5	2391.5	0.115825		0.47144			slr1272		S-layer homology domain containing protein	0.187924	0.491351	0.0281588	0.187924	0.491351
ssr1768	1062.5	869	700.5	522	1	ssr1768				hypothetical protein	1062.5	869	193.5	243.5	0.00924853			700.5	522	178.5	0.00864513		0.934757			ssr1768		hypothetical protein	0.0100309	0.875597	0.083664	0.0100309	0.875597
slr1347	3161	863	1831	512.5	1	slr1347	icfA	carbonic anhydrase	icfA	beta-type carbonic anhydrase localized in the carboxysome	3161	863	2298	2348	0.0891809			1831	512.5	1318.5	0.0638577		0.716047			slr1347	icfA	beta-type carbonic anhydrase localized in the carboxysome	0.0695864	0.738581	0.0318684	0.0695864	0.738581
sll0442	1138.5	865.5	694	475.5	1	sll0442				hypothetical protein	1138.5	865.5	273	323	0.0122681			694	475.5	218.5	0.0105824		0.862598			sll0442		hypothetical protein	0.0105559	0.791783	0.100147	0.0105559	0.791783
sll1056	1652	906	954	497	1	sll1056	purL or purI	phosphoribosylformyl glycinamidine synthetase II	purL, purI	phosphoribosylformyl glycinamidine synthetase II	1652	906	746	796	0.0302334			954	497	457	0.0221335		0.732087			sll1056	purL, purI	phosphoribosylformyl glycinamidine synthetase II	0.0243466	0.601672	0.184435	0.0243466	0.601672
ssl0353	1791	862	1082	498.5	1	ssl0353		hypothetical protein		hypothetical protein	1791	862	929	979	0.037184			1082	498.5	583.5	0.0282601		0.760007			ssl0353		hypothetical protein	0.0275709	0.852216	0.130403	0.0275709	0.852216
sll0601	1453	821	1017	462	1	sll0601		hypothetical protein		hypothetical protein	1453	821	632	682	0.0259035			1017	462	555	0.0268798		1.03769			sll0601		hypothetical protein	0.030195	0.996776	0.0578627	0.030195	0.996776
slr0392	1032.5	773.5	663.5	444.5	1	slr0392				hypothetical protein	1032.5	773.5	259	309	0.0117363			663.5	444.5	219	0.0106066		0.903743			slr0392		hypothetical protein	0.011912	0.925965	0.0314262	0.011912	0.925965
slr1271	1307	780.5	1000	470.5	1	slr1271	rffM	UDP-N-acetyl-D-mannosaminuronic acid transferase	rffM	UDP-N-acetyl-D-mannosaminuronic acid transferase	1307	780.5	526.5	576.5	0.0218964			1000	470.5	529.5	0.0256448		1.17119			slr1271	rffM	UDP-N-acetyl-D-mannosaminuronic acid transferase	0.0243875	1.08355	0.123932	0.0243875	1.08355
ssr1041	1130	785	663	457.5	1	ssr1041				NAD-reducing hydrogenase gamma subunit homolog	1130	785	345	395	0.0150028			663	457.5	205.5	0.0099528		0.663398			ssr1041		NAD-reducing hydrogenase gamma subunit homolog	0.0146941	0.748906	0.120927	0.0146941	0.748906
sll1252	1178	792.5	740	465.5	1	sll1252				hypothetical protein	1178	792.5	385.5	435.5	0.016541			740	465.5	274.5	0.0132946		0.803736			sll1252		hypothetical protein	0.0175776	0.753417	0.0711618	0.0175776	0.753417
sml0001	1128	803	745	471.5	1	sml0001	psbI	photosystem II PsbI protein	psbI	photosystem II reaction center PsbI protein	1128	803	325	375	0.0142431			745	471.5	273.5	0.0132462		0.930005			sml0001	psbI	photosystem II reaction center PsbI protein	0.0160714	0.891874	0.0539257	0.0160714	0.891874
sll1202	1152	803	672	467	1	sll1202				homolog of fecB, the substrate-binding protein of ABC-type iron(III) dicitrate transport system	1152	803	349	399	0.0151547			672	467	205	0.00992858		0.655149			sll1202		homolog of fecB, the substrate-binding protein of ABC-type iron(III) dicitrate transport system	0.0140942	0.713778	0.0829134	0.0140942	0.713778
ssr3570	1077.5	795.5	698	468	1	ssr3570				hypothetical protein	1077.5	795.5	282	332	0.0126099			698	468	230	0.0111394		0.883383			ssr3570		hypothetical protein	0.0129088	0.917605	0.048397	0.0129088	0.917605
slr0722	1227	791	797	471	1	slr0722		hypothetical protein		hypothetical protein	1227	791	436	486	0.0184591			797	471	326	0.0157889		0.855344			slr0722		hypothetical protein	0.0189228	0.835121	0.0286	0.0189228	0.835121
ssr1720	1079	786	781	520.5	1	ssr1720	tyrS	tyrosyl tRNA synthetase	tyrS	tyrosyl tRNA synthetase	1079	786	293	343	0.0130277			781	520.5	260.5	0.0126166		0.968441			ssr1720	tyrS	tyrosyl tRNA synthetase	0.0136004	0.973248	0.00679854	0.0136004	0.973248
sll1595	1069	799	715	497.5	1	sll1595			kaiC2	circadian clock protein KaiC homolog	1069	799	270	320	0.0121541			715	497.5	217.5	0.010534		0.8667			sll1595	kaiC2	circadian clock protein KaiC homolog	0.0123816	0.870439	0.00528787	0.0123816	0.870439
sgl0002	1513	804	943	514	1	sgl0002				hypothetical protein	1513	804	709	759	0.0288281			943	514	429	0.0207774		0.720734			sgl0002		hypothetical protein	0.0284906	0.714295	0.009106	0.0284906	0.714295
slr0794	1206	826	806	520.5	1	slr0794	czcA	cation efflux system protein	nrsA, czcA	Cation efflux system protein involved in nickel and cobalt tolerance	1206	826	380	430	0.0163321			806	520.5	285.5	0.0138274		0.846637			slr0794	nrsA, czcA	Cation efflux system protein involved in nickel and cobalt tolerance	0.0160829	0.855352	0.0123248	0.0160829	0.855352
sll0792	1066.5	825	730.5	484.5	1	sll0792	smtB	transcriptional repressor SmtB	ziaR, smtB	zinc-responsive transcriptional repressor of ziaA	1066.5	825	241.5	291.5	0.0110717			730.5	484.5	246	0.0119143		1.07611			sll0792	ziaR, smtB	zinc-responsive transcriptional repressor of ziaA	0.011319	0.989997	0.12178	0.011319	0.989997
slr1943	1335	841	890	473.5	1	slr1943	dpm1 or sed3	dolichol phosphate mannose synthase	dpm1, sed3	dolichol phosphate mannose synthase	1335	841	494	544	0.020662			890	473.5	416.5	0.020172		0.976283			slr1943	dpm1, sed3	dolichol phosphate mannose synthase	0.0192133	0.988736	0.0176123	0.0192133	0.988736
sll0762	1451	828.5	973	527	1	sll0762				hypothetical protein	1451	828.5	622.5	672.5	0.0255427			973	527	446	0.0216007		0.845672			sll0762		hypothetical protein	0.0243569	0.819994	0.036314	0.0243569	0.819994
slr2027	1198	834	788	498	1	slr2027				hypothetical protein	1198	834	364	414	0.0157244			788	498	290	0.0140453		0.893217			slr2027		hypothetical protein	0.0142053	0.913593	0.0288159	0.0142053	0.913593
sll1236	1032	797.5	1583	500.5	1	sll1236				hypothetical protein	1032	797.5	234.5	284.5	0.0108058			1583	500.5	1082.5	0.0524278		4.85182			sll1236		hypothetical protein	0.00900409	4.86487	0.0184509	0.00900409	4.86487
slr0435	2825	815	1641	485.5	1	slr0435	accB or fabE	biotin carboxyl carrier protein of acetyl-CoA carboxylase	accB, fabE	acetyl-CoA carboxylase biotin carboxyl carrier protein	2825	815	2010	2060	0.0782422			1641	485.5	1155.5	0.0559633		0.715257			slr0435	accB, fabE	acetyl-CoA carboxylase biotin carboxyl carrier protein	0.0613655	0.751317	0.0509963	0.0613655	0.751317
sll1097	2192	856.5	2206	501.5	1	sll1097	rps7	30S ribosomal protein S7	rpsG, rps7	30S ribosomal protein S7	2192	856.5	1335.5	1385.5	0.0526236			2206	501.5	1704.5	0.0825525		1.56874			sll1097	rpsG, rps7	30S ribosomal protein S7	0.0382643	1.46791	0.142583	0.0382643	1.46791
sll0258	2747	842	2008	508	1	sll0258	psbV	cytochrome c550	psbV	cytochrome c550	2747	842	1905	1955	0.0742541			2008	508	1500	0.0726482		0.978372			sll0258	psbV	cytochrome c550	0.0623644	0.99038	0.0169817	0.0623644	0.99038
sll1613	1094	845	722	503	1	sll1613				hypothetical protein	1094	845	249	299	0.0113565			722	503	219	0.0106066		0.933969			sll1613		hypothetical protein	0.00930842	0.975417	0.0586166	0.00930842	0.975417
sll1225	1122	859	782	496	1	sll1225				hypothetical protein	1122	859	263	313	0.0118883			782	496	286	0.0138516		1.16515			sll1225		hypothetical protein	0.00975773	1.03947	0.177729	0.00975773	1.03947
slr1440	1140	843	729	481	1	slr1440				hypothetical protein	1140	843	297	347	0.0131796			729	481	248	0.0120112		0.911342			slr1440		hypothetical protein	0.0122475	0.878857	0.0459408	0.0122475	0.878857
sll0871	1248	816	794	481	1	sll0871				hypothetical protein	1248	816	432	482	0.0183072			794	481	313	0.0151592		0.82805			sll0871		hypothetical protein	0.0168484	0.859365	0.0442854	0.0168484	0.859365
sll1837	2131	833.5	1267	511	1	sll1837				periplasmic protein, function unknown	2131	833.5	1297.5	1347.5	0.0511803			1267	511	756	0.0366147		0.715406			sll1837		periplasmic protein, function unknown	0.0399177	0.67345	0.0593345	0.0399177	0.67345
sll1834	1145	850	733	500	1	sll1834				hypothetical protein	1145	850	295	345	0.0131037			733	500	233	0.0112847		0.861185			sll1834		hypothetical protein	0.0116495	0.693913	0.236558	0.0116495	0.693913
slr1780	3075	879.5	2067	494.5	1	slr1780		hypothetical protein	ycf54	hypothetical protein	3075	879.5	2195.5	2245.5	0.0852878			2067	494.5	1572.5	0.0761595		0.89297			slr1780	ycf54	hypothetical protein	0.0641835	0.886911	0.00856894	0.0641835	0.886911
slr0737	9854	866.5	2251	506	1	slr0737	psaD	photosystem I subunit II	psaD	photosystem I reaction center subunit II	9854	866.5	8987.5	9037.5	0.343259			2251	506	1745	0.084514		0.24621			slr0737	psaD	photosystem I reaction center subunit II	0.299699	0.26833	0.0312823	0.299699	0.26833
slr1861	1253	838.5	777	503	1	slr1861				Rsb/Spo-like protein kinase	1253	838.5	414.5	464.5	0.0176425			777	503	274	0.0132704		0.752184			slr1861		Rsb/Spo-like protein kinase	0.0145465	0.814572	0.0882302	0.0145465	0.814572
slr1568	1127	804	681	461	1	slr1568				hypothetical protein	1127	804	323	373	0.0141672			681	461	220	0.0106551		0.752096			slr1568		hypothetical protein	0.0149811	0.75112	0.00138036	0.0149811	0.75112
ssr3307	2082	772	1345	482	1	ssr3307	ycf47	hypothetical protein	ycf47, secG	preprotein translocase SecG subunit	2082	772	1310	1360	0.0516551			1345	482	863	0.0417969		0.809154			ssr3307	ycf47, secG	preprotein translocase SecG subunit	0.0570025	0.779262	0.0422746	0.0570025	0.779262
slr0080	1053.5	782	754	469	1	slr0080	rnhA	ribonuclease H	rnhA	ribonuclease H	1053.5	782	271.5	321.5	0.0122111			754	469	285	0.0138032		1.13038			slr0080	rnhA	ribonuclease H	0.0126321	1.11101	0.0273945	0.0126321	1.11101
ssl3436	3240	795.5	2737	456.5	1	ssl3436	rpl29	50S ribosomal protein L29	rpmC, rpl29	50S ribosomal protein L29	3240	795.5	2444.5	2494.5	0.0947453			2737	456.5	2280.5	0.110449		1.16575			ssl3436	rpmC, rpl29	50S ribosomal protein L29	0.0991796	1.10855	0.0808947	0.0991796	1.10855
slr0149	2761	790.5	1636	503.5	1	slr0149				hypothetical protein	2761	790.5	1970.5	2020.5	0.0767419			1636	503.5	1132.5	0.0548494		0.714725			slr0149		hypothetical protein	0.0809481	0.679754	0.0494557	0.0809481	0.679754
slr1340	1048	780.5	732	499.5	1	slr1340				hypothetical protein	1048	780.5	267.5	317.5	0.0120592			732	499.5	232.5	0.0112605		0.933767			slr1340		hypothetical protein	0.0120348	0.913936	0.028046	0.0120348	0.913936
slr0954	2838	810.5	1954	467.5	1	slr0954		hypothetical protein		hypothetical protein	2838	810.5	2027.5	2077.5	0.0789069			1954	467.5	1486.5	0.0719943		0.912396			slr0954		hypothetical protein	0.0837008	0.859035	0.0754642	0.0837008	0.859035
slr1886	1238	790	1053	489	1	slr1886		putative iojap protein		iojap protein	1238	790	448	498	0.0189149			1053	489	564	0.0273157		1.44414			slr1886		iojap protein	0.0200003	1.32929	0.162426	0.0200003	1.32929
sll1960	1714	796.5	745	536	1	sll1960				hypothetical protein	1714	796.5	917.5	967.5	0.0367473			745	536	209	0.0101223		0.275458			sll1960		hypothetical protein	0.0259332	0.589324	0.443874	0.0259332	0.589324
slr1902	1188	781.5	920	506.5	1	slr1902			ISY120a	putative transposase gene of IS1 family insertion sequence ISY120a	1188	781.5	406.5	456.5	0.0173386			920	506.5	413.5	0.0200267		1.15503			slr1902	ISY120a	putative transposase gene of IS1 family insertion sequence ISY120a	0.0179378	1.17771	0.0320704	0.0179378	1.17771
slr1195	1219	783.5	908	506	1	slr1195				hypothetical protein	1219	783.5	435.5	485.5	0.0184401			908	506	402	0.0194697		1.05584			slr1195		hypothetical protein	0.0179672	0.985341	0.0996936	0.0179672	0.985341
sll1647	1129	793	753	472.5	1	sll1647				hypothetical protein	1129	793	336	386	0.0146609			753	472.5	280.5	0.0135852		0.926627			sll1647		hypothetical protein	0.0140694	0.904783	0.0308922	0.0140694	0.904783
slr1082	2372	798	1757	537	1	slr1082				hypothetical protein	2372	798	1574	1624	0.0616822			1757	537	1220	0.0590872		0.957929			slr1082		hypothetical protein	0.0577487	0.969433	0.0162699	0.0577487	0.969433
sll1405	10936	805	2162	500	1	sll1405				biopolymer transport ExbD protein homolog	10936	805	10131	10181	0.386691			2162	500	1662	0.0804942		0.208161			sll1405		biopolymer transport ExbD protein homolog	0.361347	0.194928	0.0187148	0.361347	0.194928
slr1184	1051	818.5	745.5	494.5	1	slr1184		hypothetical protein		hypothetical protein	1051	818.5	232.5	282.5	0.0107298			745.5	494.5	251	0.0121565		1.13296			slr1184		hypothetical protein	0.0112253	1.08184	0.0722921	0.0112253	1.08184
sll1819	1558	827	1223	492	1	sll1819	rpl17	50S ribosomal protein L17	rplQ, rpl17	50S ribosomal protein L17	1558	827	731	781	0.0296637			1223	492	731	0.0354039		1.19351			sll1819	rplQ, rpl17	50S ribosomal protein L17	0.0282036	1.14212	0.0726819	0.0282036	1.14212
sll0670	1031	842	664	505	1	sll0670				hypothetical protein	1031	842	189	239	0.00907762			664	505	159	0.00770071		0.848318			sll0670		hypothetical protein	0.00931787	0.745545	0.145343	0.00931787	0.745545
sll2006	1390	833	922	516.5	1	sll2006				hypothetical protein	1390	833	557	607	0.0230549			922	516.5	405.5	0.0196392		0.851847			sll2006		hypothetical protein	0.0215683	0.829552	0.0315303	0.0215683	0.829552
slr0903	1122	835.5	763	490.5	1	slr0903	moaE	molybdopterin (MPT) converting factor, subunit 2	moaE	molybdopterin (MPT) converting factor, subunit 2	1122	835.5	286.5	336.5	0.0127808			763	490.5	272.5	0.0131977		1.03262			slr0903	moaE	molybdopterin (MPT) converting factor, subunit 2	0.0126273	0.969518	0.0892414	0.0126273	0.969518
ssl3093	2442	842.5	1576	499	1	ssl3093	cpcD	phycocyanin associated linker protein	cpcD	phycobilisome small rod linker polypeptide	2442	842.5	1599.5	1649.5	0.0626508			1576	499	1077	0.0521614		0.832574			ssl3093	cpcD	phycobilisome small rod linker polypeptide	0.0566786	0.782828	0.0703509	0.0566786	0.782828
slr1885	1470	870	1401	505	1	slr1885		hypothetical protein		hypothetical protein	1470	870	600	650	0.0246881			1401	505	896	0.0433952		1.75774			slr1885		hypothetical protein	0.0207243	1.68437	0.103755	0.0207243	1.68437
sll1325	10261	907	6023	492	1	sll1325	atpD	ATP synthase d subunit	atpD, atpH	ATP synthase delta chain of CF(1)	10261	907	9354	9404	0.35718			6023	492	5531	0.267878		0.749981			sll1325	atpD, atpH	ATP synthase delta chain of CF(1)	0.298308	0.785374	0.0500523	0.298308	0.785374
slr2012	1234	870.5	812	506	1	slr2012				hypothetical protein	1234	870.5	363.5	413.5	0.0157054			812	506	306	0.0148202		0.943638			slr2012		hypothetical protein	0.0153737	0.905997	0.0532317	0.0153737	0.905997
sll1392	3540	884	2438	517	1	sll1392		hypothetical protein		hypothetical protein	3540	884	2656	2706	0.102778			2438	517	1921	0.0930381		0.90523			sll1392		hypothetical protein	0.0834813	0.866462	0.0548267	0.0834813	0.866462
sll1184	8385	876.5	5482	489	1	sll1184	ho	heme oxygenase	ho1	heme oxygenase	8385	876.5	7508.5	7558.5	0.287084			5482	489	4993	0.241822		0.842336			sll1184	ho1	heme oxygenase	0.257129	0.825748	0.0234592	0.257129	0.825748
slr1854	7942	850	4053	502.5	1	slr1854				hypothetical protein	7942	850	7092	7142	0.271265			4053	502.5	3550.5	0.171958		0.633912			slr1854		hypothetical protein	0.204374	0.630329	0.00506731	0.204374	0.630329
sll0901	1320	887	808	496	1	sll0901	purE or ade6	phosphoribosylaminoimidazole carboxylase	purE, ade6	phosphoribosylaminoimidazole carboxylase catalytic subunit	1320	887	433	483	0.0183451			808	496	312	0.0151108		0.823696			sll0901	purE, ade6	phosphoribosylaminoimidazole carboxylase catalytic subunit	0.0168384	0.766267	0.081217	0.0168384	0.766267
slr0426	2497	860	2277	487	1	slr0426	folE or gchL	GTP cyclohydrolase I	folE	GTP cyclohydrolase I	2497	860	1637	1687	0.0640751			2277	487	1790	0.0866935		1.353			slr0426	folE	GTP cyclohydrolase I	0.0481512	1.30207	0.0720169	0.0481512	1.30207
sll0921	1543	902.5	943	499.5	1	sll0921		regulatory components of sensory transduction system	rre25	two-component response regulator (NarL subfamily)	1543	902.5	640.5	690.5	0.0262263			943	499.5	443.5	0.0214796		0.81901			sll0921	rre25	two-component response regulator (NarL subfamily)	0.0218989	0.817908	0.00155913	0.0218989	0.817908
sll0563	1655	861	1279	497	1	sll0563				hypothetical protein	1655	861	794	844	0.0320565			1279	497	782	0.0378739		1.18147			sll0563		hypothetical protein	0.0230665	1.14363	0.0535117	0.0230665	1.14363
sll0729	1149	761.5	775	466	1	sll0729				modification methylase	1149	761.5	387.5	437.5	0.016617			775	466	309	0.0149655		0.900616			sll0729		modification methylase	0.0173453	0.909496	0.0125576	0.0173453	0.909496
slr0305	1171	825.5	791	460	1	slr0305		hypothetical protein		hypothetical protein	1171	825.5	345.5	395.5	0.0150217			791	460	331	0.016031		1.06719			slr0305		hypothetical protein	0.016538	1.01615	0.0721792	0.016538	1.01615
slr0023	1203	793	843	476.5	1	slr0023				hypothetical protein	1203	793	410	460	0.0174716			843	476.5	366.5	0.0177504		1.01596			slr0023		hypothetical protein	0.0195973	0.893588	0.173057	0.0195973	0.893588
sll0691	2180	802	1523	482	1	sll0691				hypothetical protein	2180	802	1378	1428	0.0542378			1523	482	1041	0.0504178		0.92957			sll0691		hypothetical protein	0.0569325	0.926061	0.00496152	0.0569325	0.926061
sll0545	1276	814	928	461.5	1	sll0545		hypothetical protein		hypothetical protein	1276	814	462	512	0.0194466			928	461.5	466.5	0.0225936		1.16183			sll0545		hypothetical protein	0.0200152	1.07502	0.122757	0.0200152	1.07502
slr1933	1582	828.5	1004	490	1	slr1933	rfbC	dTDP-4-dehydrorhamnose 3,5-epimerase	rfbC	dTDP-4-dehydrorhamnose 3,5-epimerase	1582	828.5	753.5	803.5	0.0305183			1004	490	514	0.0248941		0.815712			slr1933	rfbC	dTDP-4-dehydrorhamnose 3,5-epimerase	0.0306583	0.845373	0.0419473	0.0306583	0.845373
sll1355	1182	811	765	476.5	1	sll1355		hypothetical protein		hypothetical protein	1182	811	371	421	0.0159903			765	476.5	288.5	0.0139727		0.873822			sll1355		hypothetical protein	0.0175146	0.811123	0.0886705	0.0175146	0.811123
sll0709	1036	778	790	489	1	sll0709	llaI.2	2nd component required for LlaI restriction activity	llaI.2	2nd component required for LlaI restriction activity	1036	778	258	308	0.0116984			790	489	301	0.0145781		1.24616			sll0709	llaI.2	2nd component required for LlaI restriction activity	0.011082	1.22245	0.0335394	0.011082	1.22245
sll1643	1482	786	1016	493.5	1	sll1643				hypothetical protein	1482	786	696	746	0.0283343			1016	493.5	522.5	0.0253058		0.893114			sll1643		hypothetical protein	0.0292671	0.82351	0.0984351	0.0292671	0.82351
slr1951	1581	780	1274	476	1	slr1951				hypothetical protein	1581	780	801	851	0.0323224			1274	476	798	0.0386488		1.19573			slr1951		hypothetical protein	0.0315507	1.12581	0.0988744	0.0315507	1.12581
sll0221	1246	789.5	902	495	1	sll0221	bcp	bacterioferritin comigratory protein	bcp	bacterioferritin comigratory protein	1246	789.5	456.5	506.5	0.0192377			902	495	407	0.0197119		1.02465			sll0221	bcp	bacterioferritin comigratory protein	0.0200073	0.939099	0.120983	0.0200073	0.939099
slr0250	2815	785	3268	483	1	slr0250				hypothetical protein	2815	785	2030	2080	0.0790019			3268	483	2785	0.134883		1.70734			slr0250		hypothetical protein	0.0740454	1.634	0.103719	0.0740454	1.634
slr1658	1638	807	1176	498	1	slr1658				hypothetical protein	1638	807	831	881	0.0334618			1176	498	678	0.032837		0.981326			slr1658		hypothetical protein	0.0313384	0.958961	0.031629	0.0313384	0.958961
sll2013	2307	802.5	1313	500.5	1	sll2013		hypothetical protein		hypothetical protein	2307	802.5	1504.5	1554.5	0.0590425			1313	500.5	812.5	0.0393511		0.666488			sll2013		hypothetical protein	0.0529145	0.628423	0.0538317	0.0529145	0.628423
sll1656	2019	847.5	1555	490	1	sll1656				hypothetical protein	2019	847.5	1171.5	1221.5	0.0463946			1555	490	1065	0.0515802		1.11177			sll1656		hypothetical protein	0.0449203	1.0324	0.112247	0.0449203	1.0324
sll0740	1382	828	1014	495	1	sll0740				hypothetical protein	1382	828	554	604	0.0229409			1014	495	519	0.0251363		1.0957			sll0740		hypothetical protein	0.0211058	1.03008	0.0927929	0.0211058	1.03008
sll0520	2726	844	1723	514.5	1	sll0520	ndhI	NADH dehydrogenase subunit NdhI	ndhI	NADH dehydrogenase I chain I	2726	844	1882	1932	0.0733806			1723	514.5	1208.5	0.0585302		0.797625			sll0520	ndhI	NADH dehydrogenase I chain I	0.0625165	0.766386	0.044179	0.0625165	0.766386
slr0420	2782	846	1699	520	1	slr0420				hypothetical protein	2782	846	1936	1986	0.0754316			1699	520	1179	0.0571015		0.756997			slr0420		hypothetical protein	0.0651254	0.717775	0.0554681	0.0651254	0.717775
sll0594	1222	850	804	520	1	sll0594		transcriptional regulatory protein	cysR	transcriptional regulator, CRP family protein, function not determined in Synechocystis	1222	850	372	422	0.0160283			804	520	284	0.0137547		0.858154			sll0594	cysR	transcriptional regulator, CRP family protein, function not determined in Synechocystis	0.015091	1.00084	0.201793	0.015091	1.00084
sll0318	2767	853	1753	519	1	sll0318				hypothetical protein	2767	853	1914	1964	0.074596			1753	519	1234	0.0597652		0.801185			sll0318		hypothetical protein	0.0628056	0.74012	0.0863594	0.0628056	0.74012
slr0645	2224	875	1255	504	1	slr0645				hypothetical protein	2224	875	1349	1399	0.0531363			1255	504	751	0.0363725		0.684513			slr0645		hypothetical protein	0.0444679	0.71613	0.0447127	0.0444679	0.71613
slr0142	1531	881	963	482.5	1	slr0142				hypothetical protein	1531	881	650	700	0.0265872			963	482.5	480.5	0.0232716		0.875296			slr0142		hypothetical protein	0.0227745	0.867838	0.0105463	0.0227745	0.867838
slr1708	6212	843.5	3386	516.5	1	slr1708		lysostaphin		lysostaphin	6212	843.5	5368.5	5418.5	0.205804			3386	516.5	2869.5	0.138976		0.675284			slr1708		lysostaphin	0.16277	0.691098	0.0223637	0.16277	0.691098
slr1966	1543	862	875	502.5	1	slr1966				hypothetical protein	1543	862	681	731	0.0277646			875	502.5	372.5	0.018041		0.649783			slr1966		hypothetical protein	0.0223108	0.710023	0.0851921	0.0223108	0.710023
slr0590	1300	888.5	831	503.5	1	slr0590				hypothetical protein	1300	888.5	411.5	461.5	0.0175285			831	503.5	327.5	0.0158615		0.904897			slr0590		hypothetical protein	0.0151074	0.972337	0.0953756	0.0151074	0.972337
slr2108	1264	867	838	517	1	slr2108	kpsT	polysialic acid transport ATP-binding protein KpsT	rfbB, kpsT	putative O-antigen export system ATP-binding protein, ABC transporter ATP-binding protein, putative polysialic acid transport system ATP-binding protein	1264	867	397	447	0.0169778			838	517	321	0.0155467		0.915708			slr2108	rfbB, kpsT	putative O-antigen export system ATP-binding protein, ABC transporter ATP-binding protein, putative polysialic acid transport system ATP-binding protein	0.0145134	0.914185	0.00215341	0.0145134	0.914185
sll1470	2675	861	1922	497	1	sll1470	leuC	3-isopropylmalate dehydratase	leuC	3-isopropylmalate dehydratase large subunit	2675	861	1814	1864	0.0707978			1922	497	1425	0.0690158		0.974829			sll1470	leuC	3-isopropylmalate dehydratase large subunit	0.0540711	0.923932	0.0719786	0.0540711	0.923932
slr0273	1281	883.5	828	492.5	1	slr0273				hypothetical protein	1281	883.5	397.5	447.5	0.0169968			828	492.5	335.5	0.016249		0.956002			slr0273		hypothetical protein	0.0170235	0.898135	0.081837	0.0170235	0.898135
sll1495	1554	879	1059	506.5	1	sll1495				hypothetical protein	1554	879	675	725	0.0275367			1059	506.5	552.5	0.0267587		0.971748			sll1495		hypothetical protein	0.0217142	0.978871	0.010073	0.0217142	0.978871
slr2001	2175	865	1343	496	1	slr2001			cphB, pepE	peptidase E (alpha-aspartyl dipeptidase) or cyanophycinase	2175	865	1310	1360	0.0516551			1343	496	847	0.041022		0.794152			slr2001	cphB, pepE	peptidase E (alpha-aspartyl dipeptidase) or cyanophycinase	0.0388613	0.774367	0.0279807	0.0388613	0.774367
slr0554	1119	768	806	492.5	1	slr0554		hypothetical protein		hypothetical protein	1119	768	351	401	0.0152306			806	492.5	313.5	0.0151835		0.996902			slr0554		hypothetical protein	0.0167873	1.01631	0.0274432	0.0167873	1.01631
slr0851	1149	804	819	461.5	1	slr0851	ndh	NADH dehydrogenase	ndbA, ndh	type 2 NADH dehydrogenase	1149	804	345	395	0.0150028			819	461.5	357.5	0.0173145		1.15409			slr0851	ndbA, ndh	type 2 NADH dehydrogenase	0.0162485	1.09792	0.079437	0.0162485	1.09792
sll0041	2176	822	1455	467.5	1	sll0041	tsr or cheD	methyl-accepting chemotaxis protein I	pixJ1, pisJ1, taxD1, tsr, cheD	phytochrome-like photoreceptor protein for positive phototaxis; homologous to methyl-accepting chemotaxis protein	2176	822	1354	1404	0.0533263			1455	467.5	987.5	0.0478267		0.89687			sll0041	pixJ1, pisJ1, taxD1, tsr, cheD	phytochrome-like photoreceptor protein for positive phototaxis; homologous to methyl-accepting chemotaxis protein	0.0564671	0.893188	0.00520687	0.0564671	0.893188
slr1882	1273	798.5	1224	444	1	slr1882		hypothetical protein	ribF	riboflavin kinase / FMN adenylyltransferase	1273	798.5	474.5	524.5	0.0199214			1224	444	780	0.037777		1.89631			slr1882	ribF	riboflavin kinase / FMN adenylyltransferase	0.0200981	1.8674	0.0408771	0.0200981	1.8674
slr0103	1203	844	810	478.5	1	slr0103				hypothetical protein	1203	844	359	409	0.0155345			810	478.5	331.5	0.0160552		1.03352			slr0103		hypothetical protein	0.0166109	0.986704	0.0662099	0.0166109	0.986704
slr1369	1693	805	1028	475	1	slr1369	cdsA or cds	phosphatidate cytidylyltransferase	cdsA, cds	phosphatidate cytidylyltransferase	1693	805	888	938	0.0356268			1028	475	553	0.026783		0.751764			slr1369	cdsA, cds	phosphatidate cytidylyltransferase	0.0361573	0.764978	0.0186871	0.0361573	0.764978
sll0834	1752	776	985	474	1	sll0834		low affinity sulfate transporter		low affinity sulfate transporter	1752	776	976	1026	0.0389692			985	474	511	0.0247488		0.635087			sll0834		low affinity sulfate transporter	0.0376064	0.667605	0.0459877	0.0376064	0.667605
sll1144	1169	785.5	932	508	1	sll1144		hypothetical protein		hypothetical protein	1169	785.5	383.5	433.5	0.0164651			932	508	424	0.0205352		1.2472			sll1144		hypothetical protein	0.0163714	1.25159	0.00620836	0.0163714	1.25159
sll1653	1190	785	2673	491	1	sll1653	gerCb	spore germination protein c2	menG, gerC2	probable phylloquinone biosynthesis methlytransferase	1190	785	405	455	0.0172817			2673	491	2182	0.105679		6.11509			sll1653	menG, gerC2	probable phylloquinone biosynthesis methlytransferase	0.0183341	5.46762	0.915664	0.0183341	5.46762
sll1237	1259	770	980	491	1	sll1237	hemK	protoporphyrinogen oxidase	hemK	N(5)-glutamine methyltransferase	1259	770	489	539	0.0204721			980	491	489	0.0236833		1.15686			sll1237	hemK	N(5)-glutamine methyltransferase	0.0203155	1.11112	0.0646777	0.0203155	1.11112
sll0728	1804	780.5	1188	500.5	1	sll0728	accA	acetyl-CoA carboxylase alpha subunit	accA	acetyl-CoA carboxylase carboxyl transferase subunit alpha	1804	780.5	1023.5	1073.5	0.0407733			1188	500.5	687.5	0.0332971		0.816639			sll0728	accA	acetyl-CoA carboxylase carboxyl transferase subunit alpha	0.0386243	0.794019	0.0319886	0.0386243	0.794019
slr2103	1026	783	712	490	1	slr2103				hypothetical protein	1026	783	243	293	0.0111286			712	490	222	0.0107519		0.96615			slr2103		hypothetical protein	0.0114826	0.889803	0.107972	0.0114826	0.889803
sll1482	1169	807	841	508	1	sll1482				ABC-transporter permease protein, DevC homolog	1169	807	362	412	0.0156484			841	508	333	0.0161279		1.03064			sll1482		ABC-transporter permease protein, DevC homolog	0.0158569	0.998163	0.0459279	0.0158569	0.998163
sll1586	1177	819	770	503.5	1	sll1586				hypothetical protein	1177	819	358	408	0.0154965			770	503.5	266.5	0.0129072		0.832907			sll1586		hypothetical protein	0.0148348	0.869965	0.0524082	0.0148348	0.869965
slr1464	1054	802	722	499.5	1	slr1464				hypothetical protein	1054	802	252	302	0.0114705			722	499.5	222.5	0.0107761		0.939469			slr1464		hypothetical protein	0.010186	1.00042	0.0861944	0.010186	1.00042
slr1255	1834	812.5	1232	503.5	1	slr1255	crtB or pys	phytoene synthase	crtB, pys	phytoene synthase	1834	812.5	1021.5	1071.5	0.0406974			1232	503.5	728.5	0.0352828		0.866955			slr1255	crtB, pys	phytoene synthase	0.036694	0.84409	0.0323372	0.036694	0.84409
slr0043	1169	853	727.5	500	1	slr0043	nrtC	nitrate transport protein NrtC	cmpC	ABC-type bicarbonate transport system ATP-binding protein	1169	853	316	366	0.0139013			727.5	500	227.5	0.0110183		0.79261			slr0043	cmpC	ABC-type bicarbonate transport system ATP-binding protein	0.0133903	0.749059	0.0615906	0.0133903	0.749059
sll1625	1273	843	811	519	1	sll1625	sdhB	succinate dehydrogenase iron- sulphur protein subunit	sdhB	succinate dehydrogenase iron-sulfur protein	1273	843	430	480	0.0182312			811	519	292	0.0141422		0.775713			sll1625	sdhB	succinate dehydrogenase iron-sulfur protein	0.0165883	0.820522	0.0633691	0.0165883	0.820522
slr0319	1330	849	940	519	1	slr0319	blaOXA-3	beta-lactamase	blaOXA-3	beta-lactamase	1330	849	481	531	0.0201683			940	519	421	0.0203899		1.01099			slr0319	blaOXA-3	beta-lactamase	0.0200381	0.883472	0.180338	0.0200381	0.883472
slr0889	1142	852.5	764	513	1	slr0889		ABC1-like		ABC1-like	1142	852.5	289.5	339.5	0.0128948			764	513	251	0.0121565		0.942743			slr0889		ABC1-like	0.0132057	0.892482	0.0710803	0.0132057	0.892482
sll0078	1339	837.5	851	519	1	sll0078	thrS	threonyl-tRNA synthetase	thrS	threonyl-tRNA synthetase	1339	837.5	501.5	551.5	0.0209469			851	519	332	0.0160795		0.76763			sll0078	thrS	threonyl-tRNA synthetase	0.0185254	0.864699	0.137276	0.0185254	0.864699
sll1360	1254	835.5	825	508.5	1	sll1360	dnaX or dnaZ	DNA polymerase III subunit	dnaX, dnaZ	DNA polymerase III subunit gamma/tau [Contains: Ssp dnaX intein]	1254	835.5	418.5	468.5	0.0177944			825	508.5	316.5	0.0153288		0.861437			sll1360	dnaX, dnaZ	DNA polymerase III subunit gamma/tau [Contains: Ssp dnaX intein]	0.0162927	0.854813	0.00936773	0.0162927	0.854813
slr0565	2626	850.5	2204	515	1	slr0565				hypothetical protein	2626	850.5	1775.5	1825.5	0.0693355			2204	515	1689	0.0818018		1.1798			slr0565		hypothetical protein	0.0581093	1.11792	0.0875012	0.0581093	1.11792
slr1137	1714	887.5	1087	495	1	slr1137	ctaD	cytochrome c oxidase subunit I	ctaDI, ctaD, coxI, coxA	cytochrome c oxidase subunit I	1714	887.5	826.5	876.5	0.0332909			1087	495	592	0.0286718		0.86125			slr1137	ctaDI, ctaD, coxI, coxA	cytochrome c oxidase subunit I	0.0259719	0.858253	0.00423781	0.0259719	0.858253
slr1978	1445	852	909	508.5	1	slr1978				putative ABC-type cobalt transport system permease protein	1445	852	593	643	0.0244222			909	508.5	400.5	0.0193971		0.794239			slr1978		putative ABC-type cobalt transport system permease protein	0.0201666	0.840034	0.0647652	0.0201666	0.840034
slr0468	1240	863.5	836	519.5	1	slr0468				hypothetical protein	1240	863.5	376.5	426.5	0.0161992			836	519.5	316.5	0.0153288		0.946268			slr0468		hypothetical protein	0.0135931	1.03231	0.121684	0.0135931	1.03231
sll1802	8057	881	7962	524	1	sll1802	rpl2	50S ribosomal protein L2	rplB, rpl2	50S ribosomal protein L2	8057	881	7176	7226	0.274455			7962	524	7438	0.360238		1.31256			sll1802	rplB, rpl2	50S ribosomal protein L2	0.206935	1.28851	0.0340086	0.206935	1.28851
sll0002	1945	843	1102	519	1	sll0002	ponA	penicillin-binding protein 1A	ponA	penicillin-binding protein 1A	1945	843	1102	1152	0.0437549			1102	519	583	0.0282359		0.645321			sll0002	ponA	penicillin-binding protein 1A	0.0323914	0.706899	0.0870857	0.0323914	0.706899
sll0576	2430	837.5	1464	487	1	sll0576		HrEpiB		HrEpiB	2430	837.5	1592.5	1642.5	0.0623849			1464	487	977	0.0473182		0.758488			sll0576		HrEpiB	0.0469006	0.734616	0.0337594	0.0469006	0.734616
sll0766	1211	860.5	870	479.5	1	sll0766	radC	RadC protein	radC	DNA repair protein radC homolog	1211	860.5	350.5	400.5	0.0152117			870	479.5	390.5	0.0189127		1.24331			sll0766	radC	DNA repair protein radC homolog	0.0143641	1.06759	0.248499	0.0143641	1.06759
slr1668	2220	810	1369	467.5	1	slr1668				periplasmic protein, function unknown	2220	810	1410	1460	0.0554532			1369	467.5	901.5	0.0436615		0.787358			slr1668		periplasmic protein, function unknown	0.0597319	0.782235	0.00724541	0.0597319	0.782235
sll0177	1188	773	832	481	1	sll0177				hypothetical protein	1188	773	415	465	0.0176615			832	481	351	0.0169997		0.962528			sll0177		hypothetical protein	0.0187268	1.04796	0.12082	0.0187268	1.04796
slr1559	1242	806	821	457	1	slr1559	aroE	shikimate 5-dehydrogenase	aroE	shikimate 5-dehydrogenase	1242	806	436	486	0.0184591			821	457	364	0.0176293		0.955046			slr1559	aroE	shikimate 5-dehydrogenase	0.019589	0.924181	0.0436508	0.019589	0.924181
slr0404	2183	834	1326	466	1	slr0404				hypothetical protein	2183	834	1349	1399	0.0531363			1326	466	860	0.0416516		0.783863			slr0404		hypothetical protein	0.0571831	0.793284	0.0133232	0.0571831	0.793284
sll1334	1507	863	873	483.5	1	sll1334			hik44	two-component sensor histidine kinase	1507	863	644	694	0.0263593			873	483.5	389.5	0.0188643		0.715661			sll1334	hik44	two-component sensor histidine kinase	0.0260686	0.715327	0.000472036	0.0260686	0.715327
sll0418	1191	782.5	841	445	1	sll0418		sterol-C-methyltransferase		2-methyl-6-phytylbenzoquinone methyltransferase, sterol-C-methyltransferase	1191	782.5	408.5	458.5	0.0174146			841	445	396	0.0191791		1.10132			sll0418		2-methyl-6-phytylbenzoquinone methyltransferase, sterol-C-methyltransferase	0.0183909	1.13112	0.0421406	0.0183909	1.13112
sll0497	1601	813	1044	475.5	1	sll0497				hypothetical protein	1601	813	788	838	0.0318286			1044	475.5	568.5	0.0275337		0.865059			sll0497		hypothetical protein	0.0317287	0.807144	0.0819051	0.0317287	0.807144
slr0947	2216	770.5	1329	505	1	slr0947	ycf27	regulatory components of sensory transduction system	rpaB, ycf27, rre26	response regulator for energy transfer from phycobilisomes to photosystems, two-component response regulator (OmpR subfamily)	2216	770.5	1445.5	1495.5	0.0568016			1329	505	824	0.0399081		0.702587			slr0947	rpaB, ycf27, rre26	response regulator for energy transfer from phycobilisomes to photosystems, two-component response regulator (OmpR subfamily)	0.0568917	0.655722	0.0662773	0.0568917	0.655722
sll0031	1143	780	777	483	1	sll0031				hypothetical protein	1143	780	363	413	0.0156864			777	483	294	0.014239		0.90773			sll0031		hypothetical protein	0.0142925	0.895148	0.0177935	0.0142925	0.895148
slr1673	1393	794	945	507	1	slr1673	spoU	rRNA methylase	spoU	rRNA methylase	1393	794	599	649	0.0246501			945	507	438	0.0212133		0.860575			slr1673	spoU	rRNA methylase	0.0245672	0.840412	0.0285152	0.0245672	0.840412
slr2135	1919	794	864	480.5	1	slr2135	hupE	hydrogenase accessory protein	hupE	hydrogenase accessory protein	1919	794	1125	1175	0.0446285			864	480.5	383.5	0.0185737		0.416185			slr2135	hupE	hydrogenase accessory protein	0.0423284	0.390274	0.036644	0.0423284	0.390274
sll0405	1186	816	845	490	1	sll0405				hypothetical protein	1186	816	370	420	0.0159523			845	490	355	0.0171934		1.0778			sll0405		hypothetical protein	0.0154875	1.00543	0.102353	0.0154875	1.00543
slr0611	1863	826	1549	490	1	slr0611	crtE	geranylgeranyl pyrophosphate synthase	sds	solanesyl diphosphate synthase	1863	826	1037	1087	0.0412861			1549	490	1059	0.0512896		1.2423			slr0611	sds	solanesyl diphosphate synthase	0.0386973	1.18949	0.0746787	0.0386973	1.18949
sll0022	1447	827	782	489.5	1	sll0022				hypothetical protein	1447	827	620	670	0.0254477			782	489.5	292.5	0.0141664		0.556686			sll0022		hypothetical protein	0.0229482	0.583838	0.038399	0.0229482	0.583838
slr0457	1111	829	801	498	1	slr0457	truB or p35	tRNA pseudouridine 55 synthase	truB, p35	tRNA pseudouridine 55 synthase	1111	829	282	332	0.0126099			801	498	303	0.0146749		1.16376			slr0457	truB, p35	tRNA pseudouridine 55 synthase	0.0122426	1.12423	0.0559032	0.0122426	1.12423
slr0366	1043	837.5	694	485.5	1	slr0366				hypothetical protein	1043	837.5	205.5	255.5	0.00970431			694	485.5	208.5	0.0100981		1.04058			slr0366		hypothetical protein	0.010056	0.991537	0.0693536	0.010056	0.991537
sll0726	2410	822	1471	499	1	sll0726	pgm	phosphoglucomutase	pgm	phosphoglucomutase	2410	822	1588	1638	0.062214			1471	499	972	0.047076		0.756679			sll0726	pgm	phosphoglucomutase	0.0538534	0.719363	0.0527729	0.0538534	0.719363
sll0144	1699	838	1083	513.5	1	sll0144	pyrH or smbA	uridine monophosphate kinase	pyrH, smbA	uridine monophosphate kinase	1699	838	861	911	0.0346013			1083	513.5	569.5	0.0275821		0.79714			sll0144	pyrH, smbA	uridine monophosphate kinase	0.0301317	0.802947	0.00821185	0.0301317	0.802947
slr1463	3455	842	2334	506.5	1	slr1463	fus	elongation factor EF-G	fusA, fus	elongation factor EF-G 1	3455	842	2613	2663	0.101145			2334	506.5	1827.5	0.0885097		0.875076			slr1463	fusA, fus	elongation factor EF-G 1	0.0856963	0.811255	0.0902556	0.0856963	0.811255
sll0263	1248	858	871	509	1	sll0263				hypothetical protein	1248	858	390	440	0.0167119			871	509	362	0.0175324		1.0491			sll0263		hypothetical protein	0.0162535	0.898803	0.212547	0.0162535	0.898803
sll0528	1569	835	5271	478	1	sll0528				hypothetical protein	1569	835	734	784	0.0297776			5271	478	4793	0.232135		7.79562			sll0528		hypothetical protein	0.0242249	7.63811	0.222757	0.0242249	7.63811
sll1536	2429	853.5	1988	501	1	sll1536	moeB or chlN	molybdopterin biosynthesis MoeB protein	moeB, chlN	molybdopterin biosynthesis MoeB protein	2429	853.5	1575.5	1625.5	0.0617392			1988	501	1487	0.0720185		1.1665			sll1536	moeB, chlN	molybdopterin biosynthesis MoeB protein	0.0517816	1.07485	0.129609	0.0517816	1.07485
slr0537	3017	907	1843	505.5	1	slr0537				hypothetical protein	3017	907	2110	2160	0.0820404			1843	505.5	1337.5	0.0647779		0.789586			slr0537		hypothetical protein	0.0656203	0.78777	0.00256768	0.0656203	0.78777
sll0915	1687	895	971	475	1	sll0915	pqqE	protease	pqqE	periplasmic protease	1687	895	792	842	0.0319806			971	475	496	0.0240223		0.751154			sll0915	pqqE	periplasmic protease	0.0259153	0.750105	0.00148323	0.0259153	0.750105
sll0738	1208	867	796	487.5	1	sll0738	modA	molybdate-binding periplasmic protein	modA	ABC-type molybdate transport system substrate-binding protein	1208	867	341	391	0.0148508			796	487.5	308.5	0.0149413		1.00609			sll0738	modA	ABC-type molybdate transport system substrate-binding protein	0.0138747	1.00137	0.00668422	0.0138747	1.00137
slr1167	2514	877	2079	498	1	slr1167	gldA	glycerol dehydrogenase	gldA	glycerol dehydrogenase	2514	877	1637	1687	0.0640751			2079	498	1581	0.0765712		1.19502			slr1167	gldA	glycerol dehydrogenase	0.0482091	1.17974	0.0216091	0.0482091	1.17974
slr1735	1765	896.5	1061	507.5	1	slr1735		ABC transporter	glnQ, bgtA	ABC-type basic amino acids and glutamine transport system ATP-binding protein	1765	896.5	868.5	918.5	0.0348862			1061	507.5	553.5	0.0268072		0.768419			slr1735	glnQ, bgtA	ABC-type basic amino acids and glutamine transport system ATP-binding protein	0.0276384	0.783621	0.0214992	0.0276384	0.783621
slr1115	1656	858.5	905	496	1	slr1115				hypothetical protein	1656	858.5	797.5	847.5	0.0321895			905	496	409	0.0198087		0.615379			slr1115		hypothetical protein	0.0245136	0.686364	0.100387	0.0245136	0.686364
sll1760	1422	880.5	888	473	1	sll1760	thrB	homoserine kinase	thrB	homoserine kinase	1422	880.5	541.5	591.5	0.0224662			888	473	415	0.0200993		0.894649			sll1760	thrB	homoserine kinase	0.0193623	0.928403	0.0477349	0.0193623	0.928403
slr1312	1891	875.5	1153	476	1	slr1312	speA	arginine decarboxylase	speA	arginine decarboxylase	1891	875.5	1015.5	1065.5	0.0404695			1153	476	677	0.0327885		0.810204			slr1312	speA	arginine decarboxylase	0.0304494	0.741844	0.0966766	0.0304494	0.741844
sll1271	1372	776.5	928	462.5	1	sll1271				probable porin	1372	776.5	595.5	645.5	0.0245172			928	462.5	465.5	0.0225451		0.919566			sll1271		probable porin	0.0263448	0.941748	0.0313703	0.0263448	0.941748
slr0898	2890	793	1554	475	1	slr0898	nirA	ferredoxin--nitrite reductase	nirA	ferredoxin-nitrite reductase	2890	793	2097	2147	0.0815466			1554	475	1079	0.0522582		0.640839			slr0898	nirA	ferredoxin-nitrite reductase	0.0855517	0.634745	0.0086176	0.0855517	0.634745
sll1362	1226	795	879	476.5	1	sll1362	ileS	isoleucyl-tRNA synthetase	ileS	isoleucyl-tRNA synthetase	1226	795	431	481	0.0182692			879	476.5	402.5	0.0194939		1.06704			sll1362	ileS	isoleucyl-tRNA synthetase	0.0190403	1.03712	0.0423098	0.0190403	1.03712
sll1693	1330	824	889	492.5	1	sll1693		hypothetical protein		hypothetical protein	1330	824	506	556	0.0211178			889	492.5	396.5	0.0192033		0.909343			sll1693		hypothetical protein	0.0217294	0.889699	0.0277808	0.0217294	0.889699
sll1634	1122	822.5	736	451.5	1	sll1634				hypothetical protein	1122	822.5	299.5	349.5	0.0132746			736	451.5	284.5	0.0137789		1.03799			sll1634		hypothetical protein	0.01411	1.07084	0.046451	0.01411	1.07084
slr1862	1159	810.5	732.5	443	1	slr1862				hypothetical protein	1159	810.5	348.5	398.5	0.0151357			732.5	443	289.5	0.0140211		0.92636			slr1862		hypothetical protein	0.0150985	1.04677	0.170285	0.0150985	1.04677
sll1722	1140	808.5	948	494.5	1	sll1722				hypothetical protein	1140	808.5	331.5	381.5	0.01449			948	494.5	453.5	0.021964		1.5158			sll1722		hypothetical protein	0.0143122	1.60531	0.126581	0.0143122	1.60531
sll1572	1338	805.5	906	490.5	1	sll1572	dnaE or polC	DNA polymerase III alpha subunit	dnaE-c, polC	DNA polymerase III alpha subunit [Contains: Ssp dnaE intein]	1338	805.5	532.5	582.5	0.0221243			906	490.5	415.5	0.0201235		0.909567			sll1572	dnaE-c, polC	DNA polymerase III alpha subunit [Contains: Ssp dnaE intein]	0.0231112	0.852198	0.0811307	0.0231112	0.852198
slr1897	1330	802	1052	501.5	1	slr1897	srrA	SrrA	srrA	putative multiple sugar transport system substrate-binding protein	1330	802	528	578	0.0219534			1052	501.5	550.5	0.0266619		1.21448			slr1897	srrA	putative multiple sugar transport system substrate-binding protein	0.0223016	1.19475	0.0278985	0.0223016	1.19475
sll0574	1518	831	1012	506	1	sll0574	rfbA	integral membrane O-antigen translocator protein	rfbA	putative O-antigen export system permease protein, ABC transporter permease protein	1518	831	687	737	0.0279925			1012	506	506	0.0245066		0.875472			sll0574	rfbA	putative O-antigen export system permease protein, ABC transporter permease protein	0.0289127	0.810672	0.0916417	0.0289127	0.810672
sll1283	2678	817	1633	517	1	sll1283	spoIID	sporulation protein SpoIID	spoIID	sporulation protein SpoIID	2678	817	1861	1911	0.072583			1633	517	1116	0.0540502		0.744668			sll1283	spoIID	sporulation protein SpoIID	0.068596	0.736314	0.0118145	0.068596	0.736314
sll0449	1079	819.5	685.5	514.5	1	sll0449				hypothetical protein	1079	819.5	259.5	309.5	0.0117553			685.5	514.5	171	0.00828189		0.704522			sll0449		hypothetical protein	0.010454	0.840186	0.191857	0.010454	0.840186
sll1704	1073	821	711	512	1	sll1704	csgA ir spoC	cell-cell signaling protein, C-factor	csgA, spoC	cell-cell signaling protein, C-factor	1073	821	252	302	0.0114705			711	512	199	0.00963799		0.840244			sll1704	csgA, spoC	cell-cell signaling protein, C-factor	0.0113156	0.950933	0.156538	0.0113156	0.950933
slr1485	5575	843	980	493	1	slr1485				putative phosphatidylinositol phosphate kinase, salt-induced periplasmic protein	5575	843	4732	4782	0.181628			980	493	487	0.0235864		0.129861			slr1485		putative phosphatidylinositol phosphate kinase, salt-induced periplasmic protein	0.161583	0.14299	0.018567	0.161583	0.14299
sll0867	1532	839	1013	511.5	1	sll0867				hypothetical protein	1532	839	693	743	0.0282204			1013	511.5	501.5	0.0242887		0.86068			sll0867		hypothetical protein	0.0259565	0.86125	0.000807073	0.0259565	0.86125
slr1653	1457	856.5	822	480.5	1	slr1653	ama	N-acyl-L-amino acid amidohydrolase	ama	N-acyl-L-amino acid amidohydrolase	1457	856.5	600.5	650.5	0.0247071			822	480.5	341.5	0.0165396		0.669426			slr1653	ama	N-acyl-L-amino acid amidohydrolase	0.0221337	0.654081	0.0217017	0.0221337	0.654081
sll1280	1429	829	917	510	1	sll1280				hypothetical protein	1429	829	600	650	0.0246881			917	510	407	0.0197119		0.798437			sll1280		hypothetical protein	0.0234759	0.706475	0.130053	0.0234759	0.706475
sll1884	1261	829.5	1394	509	1	sll1884				hypothetical protein	1261	829.5	431.5	481.5	0.0182882			1394	509	885	0.0428624		2.34372			sll1884		hypothetical protein	0.0165203	2.2655	0.110631	0.0165203	2.2655
slr1226	1427	857	959	497.5	1	slr1226	purC	phosphoribosyl aminoidazole succinocarboxamide synthetase	purC	phosphoribosyl aminoidazole succinocarboxamide synthetase	1427	857	570	620	0.0235486			959	497.5	461.5	0.0223514		0.94916			slr1226	purC	phosphoribosyl aminoidazole succinocarboxamide synthetase	0.0210331	0.97503	0.0365862	0.0210331	0.97503
sll2008	1361	841	1009	489.5	1	sll2008		processing protease		processing protease	1361	841	520	570	0.0216495			1009	489.5	519.5	0.0251605		1.16217			sll2008		processing protease	0.0195623	1.056	0.150145	0.0195623	1.056
slr1540	2605	848.5	1438	489.5	1	slr1540				hypothetical protein	2605	848.5	1756.5	1806.5	0.0686139			1438	489.5	948.5	0.0459379		0.669513			slr1540		hypothetical protein	0.056281	0.645182	0.0344085	0.056281	0.645182
slr1841	5741	854.5	4675	504.5	1	slr1841				probable porin	5741	854.5	4886.5	4936.5	0.187496			4675	504.5	4170.5	0.201986		1.07728			slr1841		probable porin	0.177483	1.09247	0.021476	0.177483	1.09247
sll1123	1438	858	941	482	1	sll1123				hypothetical protein	1438	858	580	630	0.0239284			941	482	459	0.0222303		0.929034			sll1123		hypothetical protein	0.0201514	0.943768	0.0208369	0.0201514	0.943768
slr0604	1630	838.5	1320	503.5	1	slr0604	lepA	LepA gene product	lepA	GTP-binding protein LepA	1630	838.5	791.5	841.5	0.0319616			1320	503.5	816.5	0.0395448		1.23726			slr0604	lepA	GTP-binding protein LepA	0.0267844	1.23748	0.00030898	0.0267844	1.23748
slr2013	1284	862	850	511	1	slr2013				hypothetical protein	1284	862	422	472	0.0179273			850	511	339	0.0164185		0.915835			slr2013		hypothetical protein	0.0154516	0.927409	0.0163685	0.0154516	0.927409
slr0453	2292	835.5	1208	511.5	1	slr0453				hypothetical protein	2292	835.5	1456.5	1506.5	0.0572194			1208	511.5	696.5	0.033733		0.589537			slr0453		hypothetical protein	0.0442696	0.613735	0.034221	0.0442696	0.613735
sll0980	1277	851.5	825	488.5	1	sll0980				hypothetical protein	1277	851.5	425.5	475.5	0.0180603			825	488.5	336.5	0.0162974		0.902389			sll0980		hypothetical protein	0.0159139	0.889001	0.0189333	0.0159139	0.889001
sll1475	1159	858	706	482.5	1	sll1475		sensory transduction histidine kinase	sll1473-5, hik32	two-component sensor histidine kinase, a part of gene sll1473-5 for phytochrome-like protein	1159	858	301	351	0.0133316			706	482.5	223.5	0.0108246		0.811951			sll1475	sll1473-5, hik32	two-component sensor histidine kinase, a part of gene sll1473-5 for phytochrome-like protein	0.0122558	0.786945	0.0353634	0.0122558	0.786945
sll0540	1362	851.5	1256	478	1	sll0540		hypothetical protein		homolog of ABC-type phosphate transport system substrate-binding protein SphX/PstS	1362	851.5	510.5	560.5	0.0212887			1256	478	778	0.0376802		1.76996			sll0540		homolog of ABC-type phosphate transport system substrate-binding protein SphX/PstS	0.016833	1.60451	0.233988	0.016833	1.60451
slr0869	1128	877.5	728	499	1	slr0869				hypothetical protein	1128	877.5	250.5	300.5	0.0114135			728	499	229	0.011091		0.971741			slr0869		hypothetical protein	0.0109396	0.950811	0.0295995	0.0109396	0.950811
slr0209	1208	768.5	994	483.5	1	slr0209				hypothetical protein	1208	768.5	439.5	489.5	0.018592			994	483.5	510.5	0.0247246		1.32985			slr0209		hypothetical protein	0.0178114	1.41444	0.119635	0.0178114	1.41444
slr1869	1790	793.5	1021	458	1	slr1869				hypothetical protein	1790	793.5	996.5	1046.5	0.0397478			1021	458	563	0.0272673		0.686007			slr1869		hypothetical protein	0.0416935	0.6645	0.0304155	0.0416935	0.6645
slr0649	1931	828.5	1293	481.5	1	slr0649	metS	methionyl-tRNA synthetase	metS	methionyl-tRNA synthetase	1931	828.5	1102.5	1152.5	0.0437739			1293	481.5	811.5	0.0393027		0.897857			slr0649	metS	methionyl-tRNA synthetase	0.0453285	0.871789	0.0368647	0.0453285	0.871789
sll1315	1569	825	924	473	1	sll1315				hypothetical protein	1569	825	744	794	0.0301574			924	473	451	0.0218429		0.724295			sll1315		hypothetical protein	0.0312986	0.732171	0.0111378	0.0312986	0.732171
slr0060	1005	770.5	746	476	1	slr0060				hypothetical protein	1005	770.5	234.5	284.5	0.0108058			746	476	270	0.0130767		1.21015			slr0060		hypothetical protein	0.0107226	1.20436	0.00819728	0.0107226	1.20436
slr1235	1651	787.5	1289	489.5	1	slr1235				hypothetical protein	1651	787.5	863.5	913.5	0.0346962			1289	489.5	799.5	0.0387215		1.11601			slr1235		hypothetical protein	0.0354796	1.07196	0.0622956	0.0354796	1.07196
slr0226	2468	806.5	1701	505.5	1	slr0226				hypothetical protein	2468	806.5	1661.5	1711.5	0.0650056			1701	505.5	1195.5	0.0579006		0.890701			slr0226		hypothetical protein	0.0643246	0.83209	0.0828885	0.0643246	0.83209
slr1552	1113	780.5	754	490.5	1	slr1552				hypothetical protein	1113	780.5	332.5	382.5	0.014528			754	490.5	263.5	0.0127619		0.878433			slr1552		hypothetical protein	0.0142443	0.913496	0.0495865	0.0142443	0.913496
slr0355	2656	776	2174	510	1	slr0355				hypothetical protein	2656	776	1880	1930	0.0733046			2174	510	1664	0.080591		1.0994			slr0355		hypothetical protein	0.0689472	1.03808	0.0867152	0.0689472	1.03808
sll1074	1506	785	1168	514	1	sll1074	leuS	leucyl-tRNA synthetase	leuS	leucyl-tRNA synthetase	1506	785	721	771	0.0292839			1168	514	654	0.0316746		1.08164			sll1074	leuS	leucyl-tRNA synthetase	0.029655	1.00851	0.103428	0.029655	1.00851
sll0337	1213	793	864	519	1	sll0337		sensory transduction histidine kinase	phoR, hik7, sphS	phosphate sensor, two-component sensor histidine kinase	1213	793	420	470	0.0178514			864	519	345	0.0167091		0.93601			sll0337	phoR, hik7, sphS	phosphate sensor, two-component sensor histidine kinase	0.0156453	1.01254	0.108235	0.0156453	1.01254
sll1917	1149	825.5	794	521	1	sll1917	hemN	oxygen independent coprophorphyrinogen III oxidase	hemN2	coproporphyrinogen III oxidase, anaerobic (oxygen-independent)	1149	825.5	323.5	373.5	0.0141862			794	521	273	0.013222		0.932033			sll1917	hemN2	coproporphyrinogen III oxidase, anaerobic (oxygen-independent)	0.0142086	0.881404	0.0716008	0.0142086	0.881404
slr1927	1483	821.5	1226	503	1	slr1927				hypothetical protein	1483	821.5	661.5	711.5	0.027024			1226	503	723	0.0350164		1.29575			slr1927		hypothetical protein	0.02475	1.22041	0.106559	0.02475	1.22041
slr1395	1189	830.5	803	505.5	1	slr1395				hypothetical protein	1189	830.5	358.5	408.5	0.0155155			803	505.5	297.5	0.0144086		0.928655			slr1395		hypothetical protein	0.0155491	0.868532	0.0850262	0.0155491	0.868532
slr0901	1245	830.5	897	476	1	slr0901	moaA	molybdenum cofactor biosynthesis protein A	moaA	molybdopterin biosynthesis protein A	1245	830.5	414.5	464.5	0.0176425			897	476	421	0.0203899		1.15573			slr0901	moaA	molybdopterin biosynthesis protein A	0.0163229	1.03725	0.167557	0.0163229	1.03725
sll1699	1270	806	890	498	1	sll1699	appA	oligopeptide transport system permease protein	appA	ABC-type oligopeptide transport system substrate-binding protein	1270	806	464	514	0.0195226			890	498	392	0.0189854		0.972484			sll1699	appA	ABC-type oligopeptide transport system substrate-binding protein	0.0180643	0.927716	0.0633115	0.0180643	0.927716
slr0421	1117	820.5	757	511	1	slr0421				hypothetical protein	1117	820.5	296.5	346.5	0.0131606			757	511	246	0.0119143		0.905297			slr0421		hypothetical protein	0.0121511	0.968161	0.0889031	0.0121511	0.968161
sll1304	2012	835.5	1340	504	1	sll1304				hypothetical protein	2012	835.5	1176.5	1226.5	0.0465845			1340	504	836	0.0404892		0.869157			sll1304		hypothetical protein	0.0409893	0.820028	0.0694785	0.0409893	0.820028
sll0462	1751	839.5	1333	515.5	1	sll0462				hypothetical protein	1751	839.5	911.5	961.5	0.0365194			1333	515.5	817.5	0.0395932		1.08417			sll0462		hypothetical protein	0.0297681	1.1264	0.0597206	0.0297681	1.1264
slr0884	1516	850.5	935	511	1	slr0884	gap1	glyceraldehyde 3-phosphate dehydrogenase	gap1	glyceraldehyde 3-phosphate dehydrogenase 1 (NAD+)	1516	850.5	665.5	715.5	0.0271759			935	511	424	0.0205352		0.755641			slr0884	gap1	glyceraldehyde 3-phosphate dehydrogenase 1 (NAD+)	0.0239764	0.731914	0.0335554	0.0239764	0.731914
slr0436	1548	829.5	1147	503	1	slr0436	ccmK	carbon dioxide concentrating mechanism protein CcmK	ccmO, (ccmK)	carbon dioxide concentrating mechanism protein CcmO, N terminus closely related to CcmK2 (Sll1028)	1548	829.5	718.5	768.5	0.0291889			1147	503	644	0.0311903		1.06857			slr0436	ccmO, (ccmK)	carbon dioxide concentrating mechanism protein CcmO, N terminus closely related to CcmK2 (Sll1028)	0.0246739	1.02344	0.0638183	0.0246739	1.02344
slr1227	1803	869.5	1197	500.5	1	slr1227	IAP75	chloroplast import-associated channel IAP75	IAP75	chloroplast import-associated channel IAP75	1803	869.5	933.5	983.5	0.037355			1197	500.5	696.5	0.033733		0.903038			slr1227	IAP75	chloroplast import-associated channel IAP75	0.0322037	0.917654	0.0206698	0.0322037	0.917654
sll0006	3067	831.5	2157	526	1	sll0006	aspC or aat	aspartate aminotransferase	aspC, aat	N-succinyldiaminopimelate aminotransferase	3067	831.5	2235.5	2285.5	0.0868071			2157	526	1631	0.0789928		0.909981			sll0006	aspC, aat	N-succinyldiaminopimelate aminotransferase	0.0697705	0.890167	0.0280213	0.0697705	0.890167
sll1734	1548	841.5	1000	501	1	sll1734			cupA	involved in inducible high-affinity CO2 uptake.	1548	841.5	706.5	756.5	0.0287331			1000	501	499	0.0241676		0.841107			sll1734	cupA	involved in inducible high-affinity CO2 uptake.	0.0249674	0.811383	0.0420351	0.0249674	0.811383
sll0759	3087	868	1755	505	1	sll0759		ABC transporter		ABC-2 type transport system ATP-binding protein	3087	868	2219	2269	0.0861804			1755	505	1250	0.0605401		0.702482			sll0759		ABC-2 type transport system ATP-binding protein	0.0668697	0.718972	0.0233205	0.0668697	0.718972
slr1133	1806	859	1018	506	1	slr1133	argH	L-argininosuccinate lyase	argH	L-argininosuccinate lyase	1806	859	947	997	0.0378677			1018	506	512	0.0247972		0.654838			slr1133	argH	L-argininosuccinate lyase	0.030365	0.742364	0.12378	0.030365	0.742364
slr0324	1344	838	827	491	1	slr0324	appC	oligopeptide transport system permease protein	appC	ABC-type oligopeptide transport system permease protein	1344	838	506	556	0.0211178			827	491	336	0.0162732		0.770591			slr0324	appC	ABC-type oligopeptide transport system permease protein	0.0174137	0.79765	0.0382675	0.0174137	0.79765
sll1581	1936	836	1112	500	1	sll1581	gumB	GumB protein	gumB	GumB protein	1936	836	1100	1150	0.0436789			1112	500	612	0.0296404		0.678599			sll1581	gumB	GumB protein	0.0344581	0.685021	0.0090822	0.0344581	0.685021
sll0147	1231	868	831	484	1	sll0147				hypothetical protein	1231	868	363	413	0.0156864			831	484	347	0.0168059		1.07137			sll0147		hypothetical protein	0.0135298	0.885219	0.263255	0.0135298	0.885219
sll0993	1404	875.5	832	496.5	1	sll0993		potassium channel		potassium channel	1404	875.5	528.5	578.5	0.0219724			832	496.5	335.5	0.016249		0.739518			sll0993		potassium channel	0.0177445	0.769861	0.0429123	0.0177445	0.769861
sll1807	4131	839	4762	490.5	1	sll1807	rpl24	50S ribosomal protein L24	rplX, rpl24	50S ribosomal protein L24	4131	839	3292	3342	0.126935			4762	490.5	4271.5	0.206878		1.6298			sll1807	rplX, rpl24	50S ribosomal protein L24	0.123935	1.59827	0.0445829
sll1807	5136	839	6094	512	1	sll1807	rpl24	50S ribosomal protein L24	rplX, rpl24	50S ribosomal protein L24	5136	839	4297	4347	0.165106			6094	512	5582	0.270348		1.63742			sll1807	rplX, rpl24	50S ribosomal protein L24	0.155494	1.53624	0.143085
ssr1766	1173	798.5	766	517.5	1	ssr1766				hypothetical protein	1173	798.5	374.5	424.5	0.0161232			766	517.5	248.5	0.0120354		0.746463			ssr1766		hypothetical protein	0.014482	0.840629	0.133171	0.014482	0.840629
sll1739	1289	807.5	1027	513.5	1	sll1739				hypothetical protein	1289	807.5	481.5	531.5	0.0201873			1027	513.5	513.5	0.0248699		1.23196			sll1739		hypothetical protein	0.018107	1.23448	0.00356102	0.018107	1.23448
sll1801	2770	796.5	2674	524.5	1	sll1801	rpl23	50S ribosomal protein L23	rplW, rpl23	50S ribosomal protein L23	2770	796.5	1973.5	2023.5	0.0768559			2674	524.5	2149.5	0.104105		1.35455			sll1801	rplW, rpl23	50S ribosomal protein L23	0.0733779	1.38817	0.0475532	0.0733779	1.38817
sll1378	1177	811	892	502.5	1	sll1378				periplasmic protein, function unknown	1177	811	366	416	0.0158004			892	502.5	389.5	0.0188643		1.19392			sll1378		periplasmic protein, function unknown	0.0146971	1.32425	0.184326	0.0146971	1.32425
ssr0482	4318	819.5	2814	508.5	1	ssr0482	rps16	30S ribosomal protein S16	rpsP, rps16	30S ribosomal protein S16	4318	819.5	3498.5	3548.5	0.134778			2814	508.5	2305.5	0.11166		0.828476			ssr0482	rpsP, rps16	30S ribosomal protein S16	0.122691	0.824187	0.00606465	0.122691	0.824187
slr1152	1752	831	1107	515	1	slr1152		hypothetical protein		hypothetical protein	1752	831	921	971	0.0368802			1107	515	592	0.0286718		0.777431			slr1152		hypothetical protein	0.0331731	0.748774	0.0405279	0.0331731	0.748774
sll0761	2995	827	1985	508.5	1	sll0761				hypothetical protein	2995	827	2168	2218	0.0842433			1985	508.5	1476.5	0.07151		0.848851			sll0761		hypothetical protein	0.0741848	0.828985	0.0280946	0.0741848	0.828985
slr1214	1238	799	800	484	1	slr1214		PatA protein	rre15	two-component response regulator (PatA subfamily)	1238	799	439	489	0.018573			800	484	316	0.0153045		0.82402			slr1214	rre15	two-component response regulator (PatA subfamily)	0.017464	0.801072	0.0324534	0.017464	0.801072
slr1206	1108	809	1013	496	1	slr1206				hypothetical protein	1108	809	299	349	0.0132556			1013	496	517	0.0250394		1.88897			slr1206		hypothetical protein	0.0121599	1.54409	0.487735	0.0121599	1.54409
slr1453	1030	810	704.5	467	1	slr1453	cysT	sulfate transport system permease protein	cysT	ABC-type sulfate transport system permease protein	1030	810	220	270	0.010255			704.5	467	237.5	0.0115026		1.12165			slr1453	cysT	ABC-type sulfate transport system permease protein	0.0102831	0.981412	0.198334	0.0102831	0.981412
slr2121	1433	851.5	970	505.5	1	slr2121				hypothetical protein	1433	851.5	581.5	631.5	0.0239854			970	505.5	464.5	0.0224967		0.937933			slr2121		hypothetical protein	0.0206433	0.874798	0.0892859	0.0206433	0.874798
sll0088	1263	801	874	484.5	1	sll0088				hypothetical protein	1263	801	462	512	0.0194466			874	484.5	389.5	0.0188643		0.970056			sll0088		hypothetical protein	0.0183353	0.90467	0.0924708	0.0183353	0.90467
sll1764	2105	802	1382	478	1	sll1764				hypothetical protein	2105	802	1303	1353	0.0513892			1382	478	904	0.0437826		0.851981			sll1764		hypothetical protein	0.0412965	0.830522	0.0303474	0.0412965	0.830522
slr1603	2042	878	2157	469	1	slr1603				hypothetical protein	2042	878	1164	1214	0.0461097			2157	469	1688	0.0817534		1.77302			slr1603		hypothetical protein	0.0369479	1.57166	0.284763	0.0369479	1.57166
slr0325	1142	826	749	489	1	slr0325				hypothetical protein	1142	826	316	366	0.0139013			749	489	260	0.0125923		0.90584			slr0325		hypothetical protein	0.0130814	0.81503	0.128426	0.0130814	0.81503
slr0015	1317	860.5	836	478.5	1	slr0015	lpxB	lipid A disaccharide synthase	lpxB	lipid A disaccharide synthase	1317	860.5	456.5	506.5	0.0192377			836	478.5	357.5	0.0173145		0.900028			slr0015	lpxB	lipid A disaccharide synthase	0.0171785	0.888804	0.0158734	0.0171785	0.888804
ssr2315	1417	796.5	1039	439	1	ssr2315				hypothetical protein	1417	796.5	620.5	670.5	0.0254667			1039	439	600	0.0290593		1.14107			ssr2315		hypothetical protein	0.0272347	1.13794	0.00442155	0.0272347	1.13794
slr1946	1638	783	1075	482	1	slr1946				hypothetical protein	1638	783	855	905	0.0343734			1075	482	593	0.0287202		0.835537			slr1946		hypothetical protein	0.0357237	0.788537	0.066467	0.0357237	0.788537
sll0253	1292	765	831	500.5	1	sll0253				hypothetical protein	1292	765	527	577	0.0219154			831	500.5	330.5	0.0160068		0.73039			sll0253		hypothetical protein	0.0242136	0.631496	0.139858	0.0242136	0.631496
sll2012	1696	749	1712	495	1	sll2012	rpoD	RNA polymerase sigma factor	sigD, rpoD	RNA polymerase sigma factor	1696	749	947	997	0.0378677			1712	495	1217	0.0589419		1.55652			sll2012	sigD, rpoD	RNA polymerase sigma factor	0.0372777	1.478	0.111045	0.0372777	1.478
ssr2711	978.5	768	744.5	467	1	ssr2711				hypothetical protein	978.5	768	210.5	260.5	0.00989422			744.5	467	277.5	0.0134399		1.35836			ssr2711		hypothetical protein	0.0104599	1.2364	0.172478	0.0104599	1.2364
slr1248	1072.5	781	752.5	484	1	slr1248	pstC or phoW	phosphate transport system permease protein PstC	pstC, phoW	ABC-type phosphate transport system permease protein	1072.5	781	291.5	341.5	0.0129707			752.5	484	268.5	0.013004		1.00257			slr1248	pstC, phoW	ABC-type phosphate transport system permease protein	0.0138615	0.927363	0.106354	0.0138615	0.927363
slr0238	1118	763.5	848	501.5	1	slr0238				hypothetical protein	1118	763.5	354.5	404.5	0.0153636			848	501.5	346.5	0.0167817		1.09231			slr0238		hypothetical protein	0.0158883	1.00068	0.129572	0.0158883	1.00068
sll1080	1171	776.5	894	515	1	sll1080				ABC transport system substrate-binding protein	1171	776.5	394.5	444.5	0.0168828			894	515	379	0.0183558		1.08724			sll1080		ABC transport system substrate-binding protein	0.016812	1.06094	0.0371975	0.016812	1.06094
sll0065	981	759	706	504	1	sll0065	ilvN	acetolactate synthase	ilvN	acetolactate synthase small subunit	981	759	222	272	0.010331			706	504	202	0.00978329		0.946982			sll0065	ilvN	acetolactate synthase small subunit	0.0103404	1.00225	0.0781579	0.0103404	1.00225
sll1786	7367	807.5	7207	498	1	sll1786		hypothetical protein		putative deoxyribonuclease, tatD homolog	7367	807.5	6559.5	6609.5	0.25104			7207	498	6709	0.324931		1.29434			sll1786		putative deoxyribonuclease, tatD homolog	0.247149	1.23548	0.08324	0.247149	1.23548
sll1774	2618	786.5	1880	498	1	sll1774				hypothetical protein	2618	786.5	1831.5	1881.5	0.0714625			1880	498	1382	0.0669332		0.93662			sll1774		hypothetical protein	0.069986	0.922344	0.0201887	0.069986	0.922344
slr0118	6010	794	3630	505	1	slr0118	thiC	ThiC protein	thiC	thiamin biosynthesis protein ThiC	6010	794	5216	5266	0.200011			3630	505	3125	0.15135		0.756708			slr0118	thiC	thiamin biosynthesis protein ThiC	0.189582	0.708534	0.0681287	0.189582	0.708534
sll1240	1021.5	808	707	512	1	sll1240				hypothetical protein	1021.5	808	213.5	263.5	0.0100082			707	512	195	0.00944426		0.943655			sll1240		hypothetical protein	0.00999555	0.948907	0.00742757	0.00999555	0.948907
slr0924	5608	807	5467	512	1	slr0924				salt-induced periplasmic protein, function unknown	5608	807	4801	4851	0.184249			5467	512	4955	0.239981		1.30248			slr0924		salt-induced periplasmic protein, function unknown	0.171129	1.23774	0.0915596	0.171129	1.23774
slr1396	1076	767	773.5	483	1	slr1396				hypothetical protein	1076	767	309	359	0.0136354			773.5	483	290.5	0.0140695		1.03184			slr1396		hypothetical protein	0.0124464	1.00434	0.0388843	0.0124464	1.00434
slr1743	1415	798.5	1121	478	1	slr1743	ndh	NADH dehydrogenase	ndbB, ndh	type 2 NADH dehydrogenase	1415	798.5	616.5	666.5	0.0253148			1121	478	643	0.0311418		1.23018			slr1743	ndbB, ndh	type 2 NADH dehydrogenase	0.0232389	1.17862	0.0729208	0.0232389	1.17862
slr1062	1117	777	814	493	1	slr1062				hypothetical protein	1117	777	340	390	0.0148128			814	493	321	0.0155467		1.04954			slr1062		hypothetical protein	0.0141744	0.983422	0.093508	0.0141744	0.983422
slr0881	2125	816	1469	496	1	slr0881				hypothetical protein	2125	816	1309	1359	0.0516171			1469	496	973	0.0471244		0.912962			slr0881		hypothetical protein	0.0471261	0.851847	0.0864299	0.0471261	0.851847
sll1052	1034	789	714	516	1	sll1052				hypothetical protein	1034	789	245	295	0.0112046			714	516	198	0.00958956		0.85586			sll1052		hypothetical protein	0.0113951	0.787767	0.0962971	0.0113951	0.787767
slr1846	1279	796.5	1013	502.5	1	slr1846		hypothetical protein	ycf64	hypothetical protein	1279	796.5	482.5	532.5	0.0202252			1013	502.5	510.5	0.0247246		1.22246			slr1846	ycf64	hypothetical protein	0.0188694	1.16248	0.0848247	0.0188694	1.16248
ssl0452	2388	827.5	3762	483.5	1	ssl0452	nblA	phycobilisome degradation protein NblA	nblA1	phycobilisome degradation protein NblA	2388	827.5	1560.5	1610.5	0.0611695			3762	483.5	3278.5	0.158785		2.59582			ssl0452	nblA1	phycobilisome degradation protein NblA	0.0525684	2.47654	0.168684	0.0525684	2.47654
ssl1255	1150	794.5	827	488	1	ssl1255				hypothetical protein	1150	794.5	355.5	405.5	0.0154016			827	488	339	0.0164185		1.06603			ssl1255		hypothetical protein	0.0144784	0.957685	0.153219	0.0144784	0.957685
slr0601	1170	835	832	479.5	1	slr0601				hypothetical protein	1170	835	335	385	0.0146229			832	479.5	352.5	0.0170723		1.1675			slr0601		hypothetical protein	0.0140118	1.06437	0.145858	0.0140118	1.06437
ssl0564	1353	807.5	1063	494	1	ssl0564	ompR	transcriptional regulatory protein	ompR	transcriptional regulatory protein	1353	807.5	545.5	595.5	0.0226181			1063	494	569	0.0275579		1.2184			ssl0564	ompR	transcriptional regulatory protein	0.0190424	1.15913	0.0838193	0.0190424	1.15913
sll0554	2404	809.5	1743	497.5	1	sll0554	ftrC	ferredoxin-thioredoxin reductase, catalytic chain	ftrC	ferredoxin-thioredoxin reductase, catalytic chain	2404	809.5	1594.5	1644.5	0.0624608			1743	497.5	1245.5	0.0603222		0.96576			sll0554	ftrC	ferredoxin-thioredoxin reductase, catalytic chain	0.0522583	0.896582	0.0978331	0.0522583	0.896582
ssl0453	1172	812	950	499	1	ssl0453	nblA	phycobilisome degradation protein NblA	nblA2	phycobilisome degradation protein NblA	1172	812	360	410	0.0155725			950	499	451	0.0218429		1.40266			ssl0453	nblA2	phycobilisome degradation protein NblA	0.0159348	1.2177	0.261573	0.0159348	1.2177
sll0420	1231	826	819	479.5	1	sll0420	ureB	urease beta subunit	ureB	urease beta subunit	1231	826	405	455	0.0172817			819	479.5	339.5	0.0164427		0.951454			sll0420	ureB	urease beta subunit	0.0140861	1.20104	0.352973	0.0140861	1.20104
ssr2047	1352	871	896	490.5	1	ssr2047				hypothetical protein	1352	871	481	531	0.0201683			896	490.5	405.5	0.0196392		0.973769			ssr2047		hypothetical protein	0.0181554	0.961821	0.016897	0.0181554	0.961821
slr0821	2198	827	1813	509	1	slr0821		hypothetical protein		hypothetical protein	2198	827	1371	1421	0.0539719			1813	509	1304	0.0631555		1.17015			slr0821		hypothetical protein	0.0452237	1.07516	0.134336	0.0452237	1.07516
ssr2142	1544	831	1023	464.5	1	ssr2142	ycf19	hypothetical protein	ycf19	hypothetical protein	1544	831	713	763	0.02898			1023	464.5	558.5	0.0270493		0.933379			ssr2142	ycf19	hypothetical protein	0.0250715	0.904584	0.0407229	0.0250715	0.904584
sll1912	995	777	682.5	455	1	sll1912				hypothetical protein	995	777	218	268	0.0101791			682.5	455	227.5	0.0110183		1.08245			sll1912		hypothetical protein	0.0102258	0.953337	0.182587	0.0102258	0.953337
sll0662	1668	774	942	484.5	1	sll0662				4Fe-4S type iron-sulfur protein, ferredoxin	1668	774	894	944	0.0358547			942	484.5	457.5	0.0221577		0.617986			sll0662		4Fe-4S type iron-sulfur protein, ferredoxin	0.0383373	0.574594	0.0613656	0.0383373	0.574594
ssl2009	1069	753	723	468	1	ssl2009				hypothetical protein	1069	753	316	366	0.0139013			723	468	255	0.0123502		0.88842			ssl2009		hypothetical protein	0.0135834	0.862586	0.0365349	0.0135834	0.862586
sll1078	999	750	724	498	1	sll1078			hypA2	putative hydrogenase expression/formation protein HypA2	999	750	249	299	0.0113565			724	498	226	0.0109457		0.963822			sll1078	hypA2	putative hydrogenase expression/formation protein HypA2	0.0119248	0.926153	0.0532721	0.0119248	0.926153
ssr0336	1008	750	713	466	1	ssr0336				hypothetical protein	1008	750	258	308	0.0116984			713	466	247	0.0119627		1.0226			ssr0336		hypothetical protein	0.0116034	0.892618	0.183821	0.0116034	0.892618
slr0724	980	758	711.5	474	1	slr0724	sohA or PrlF	HtaR suppressor protein	sohA, prlF	HtaR suppressor protein	980	758	222	272	0.010331			711.5	474	237.5	0.0115026		1.11341			slr0724	sohA, prlF	HtaR suppressor protein	0.0110355	1.04593	0.0954246	0.0110355	1.04593
ssr2318	968	756.5	678	511	1	ssr2318				hypothetical protein	968	756.5	211.5	261.5	0.0099322			678	511	167	0.00808816		0.814337			ssr2318		hypothetical protein	0.00978379	0.873327	0.0834248	0.00978379	0.873327
ssl0352	1200	789.5	892	501.5	1	ssl0352				hypothetical protein	1200	789.5	410.5	460.5	0.0174906			892	501.5	390.5	0.0189127		1.08131			ssl0352		hypothetical protein	0.0186896	0.936521	0.204764	0.0186896	0.936521
sll0039	1756	769	1454	500.5	1	sll0039	cheY	chemotaxis protein CheY	pixH, pisH, cheY, rre35	two-component response regulator (CheY subfamily), chemotaxis protein CheY	1756	769	987	1037	0.039387			1454	500.5	953.5	0.04618		1.17247			sll0039	pixH, pisH, cheY, rre35	two-component response regulator (CheY subfamily), chemotaxis protein CheY	0.0394663	1.08658	0.12147	0.0394663	1.08658
ssr2549	1070	760	810	484	1	ssr2549				hypothetical protein	1070	760	310	360	0.0136734			810	484	326	0.0157889		1.15471			ssr2549		hypothetical protein	0.0133826	1.07424	0.113805	0.0133826	1.07424
slr0770	1127	760	832	505	1	slr0770				hypothetical protein	1127	760	367	417	0.0158384			832	505	327	0.0158373		0.999933			slr0770		hypothetical protein	0.015276	0.951726	0.0681751	0.015276	0.951726
ssr3188	1349	803	1469	498	1	ssr3188				hypothetical protein	1349	803	546	596	0.0226371			1469	498	971	0.0470276		2.07746			ssr3188		hypothetical protein	0.0221897	2.00991	0.095528	0.0221897	2.00991
slr1170	1031	770	785	500	1	slr1170				hypothetical protein	1031	770	261	311	0.0118123			785	500	285	0.0138032		1.16854			slr1170		hypothetical protein	0.0120465	1.07193	0.136629	0.0120465	1.07193
ssl2542	1032	789	1146	485.5	1	ssl2542	hliA	high light-inducible protein	hliA, scpC	high light inducible protein	1032	789	243	293	0.0111286			1146	485.5	660.5	0.0319894		2.87452			ssl2542	hliA, scpC	high light inducible protein	0.0118785	2.55233	0.455642	0.0118785	2.55233
slr1241	1092.5	769.5	736	511.5	1	slr1241				hypothetical protein	1092.5	769.5	323	373	0.0141672			736	511.5	224.5	0.010873		0.76748			slr1241		hypothetical protein	0.0138032	0.821676	0.0766451	0.0138032	0.821676
slr1178	1629	770	1104	485.5	1	slr1178				hypothetical protein	1629	770	859	909	0.0345253			1104	485.5	618.5	0.0299553		0.867631			slr1178		hypothetical protein	0.0325074	0.84952	0.0256133	0.0325074	0.84952
slr1601	2179	804	1290	522	1	slr1601				hypothetical protein	2179	804	1375	1425	0.0541239			1290	522	768	0.0371959		0.687236			slr1601		hypothetical protein	0.0484953	0.635077	0.0737637	0.0484953	0.635077
slr0920	1078	763.5	790	477	1	slr0920				hypothetical protein	1078	763.5	314.5	364.5	0.0138443			790	477	313	0.0151592		1.09498			slr0920		hypothetical protein	0.0136418	1.06418	0.0435609	0.0136418	1.06418
sll0410	1569	793	1134	499	1	sll0410				hypothetical protein	1569	793	776	826	0.0313729			1134	499	635	0.0307544		0.980287			sll0410		hypothetical protein	0.0282375	1.01563	0.0499848	0.0282375	1.01563
sll1851	1061	775.5	749	527.5	1	sll1851				hypothetical protein	1061	775.5	285.5	335.5	0.0127428			749	527.5	221.5	0.0107277		0.841861			sll1851		hypothetical protein	0.0135835	0.870129	0.0399767	0.0135835	0.870129
slr0935	1146	782	829	479.5	1	slr0935				hypothetical protein	1146	782	364	414	0.0157244			829	479.5	349.5	0.016927		1.07648			slr0935		hypothetical protein	0.014968	0.941477	0.190924	0.014968	0.941477
sll1821	5102	776.5	4231	489.5	1	sll1821	rpl13	50S ribosomal protein L13	rplM, rpl13	50S ribosomal protein L13	5102	776.5	4325.5	4375.5	0.166189			4231	489.5	3741.5	0.181209		1.09038			sll1821	rplM, rpl13	50S ribosomal protein L13	0.146854	1.06746	0.0324084	0.146854	1.06746
sll1160	1112	784.5	743	489.5	1	sll1160				hypothetical protein	1112	784.5	327.5	377.5	0.0143381			743	489.5	253.5	0.0122775		0.856289			sll1160		hypothetical protein	0.0135991	0.901866	0.0644553	0.0135991	0.901866
slr1183	1063	782	743	475	1	slr1183				hypothetical protein	1063	782	281	331	0.0125719			743	475	268	0.0129798		1.03244			slr1183		hypothetical protein	0.0127353	0.962508	0.0989035	0.0127353	0.962508
slr1142	1206	785.5	787	498.5	1	slr1142				hypothetical protein	1206	785.5	420.5	470.5	0.0178704			787	498.5	288.5	0.0139727		0.78189			slr1142		hypothetical protein	0.0153362	0.781114	0.00109755	0.0153362	0.781114
slr0313	1060.5	790.5	738.5	489	1	slr0313				hypothetical protein	1060.5	790.5	270	320	0.0121541			738.5	489	249.5	0.0120838		0.994214			slr0313		hypothetical protein	0.0121499	0.995506	0.00182732	0.0121499	0.995506
slr1084	1263	807.5	779	477.5	1	slr1084				hypothetical protein	1263	807.5	455.5	505.5	0.0191997			779	477.5	301.5	0.0146023		0.760546			slr1084		hypothetical protein	0.0178643	0.758216	0.00329465	0.0178643	0.758216
sll0395	1283	818.5	794	483.5	1	sll0395		hypothetical protein		hypothetical protein	1283	818.5	464.5	514.5	0.0195416			794	483.5	310.5	0.0150382		0.769548			sll0395		hypothetical protein	0.0180448	0.799715	0.0426622	0.0180448	0.799715
sll0044	1113	813.5	736	483	1	sll0044				hypothetical protein	1113	813.5	299.5	349.5	0.0132746			736	483	253	0.0122533		0.923066			sll0044		hypothetical protein	0.0124301	0.884871	0.0540155	0.0124301	0.884871
slr0169	1230.5	816	783	474	1	slr0169				hypothetical protein	1230.5	816	414.5	464.5	0.0176425			783	474	309	0.0149655		0.848266			slr0169		hypothetical protein	0.0164774	0.851489	0.00455804	0.0164774	0.851489
sll0690	977	781	661	449	1	sll0690	vapC	virulence associated protein C	vapC	virulence associated protein C	977	781	196	246	0.00934349			661	449	212	0.0102676		1.09891			sll0690	vapC	virulence associated protein C	0.00896808	1.03763	0.0866548	0.00896808	1.03763
slr1281	1643	768	917	482	1	slr1281	ndhJ	NADH dehydrogenase subunit I	ndhJ	NADH dehydrogenase I chain C	1643	768	875	925	0.035133			917	482	435	0.021068		0.599663			slr1281	ndhJ	NADH dehydrogenase I chain C	0.0370883	0.590079	0.0135535	0.0370883	0.590079
sll0167	1261	733.5	840	477	1	sll0167				hypothetical protein	1261	733.5	527.5	577.5	0.0219344			840	477	363	0.0175809		0.801519			sll0167		hypothetical protein	0.0221377	0.753172	0.0683729	0.0221377	0.753172
sll1973	1694	765	1081	488	1	sll1973		hypothetical protein		hypothetical protein	1694	765	929	979	0.037184			1081	488	593	0.0287202		0.772381			sll1973		hypothetical protein	0.0399675	0.73701	0.050022	0.0399675	0.73701
slr0294	1152	780	887	492.5	1	slr0294				hypothetical protein	1152	780	372	422	0.0160283			887	492.5	394.5	0.0191065		1.19205			slr0294		hypothetical protein	0.0172826	1.15723	0.0492466	0.0172826	1.15723
sll1712	7700	770	3045	502	1	sll1712		DNA binding protein HU		DNA binding protein HU	7700	770	6930	6980	0.265112			3045	502	2543	0.123163		0.464569			sll1712		DNA binding protein HU	0.283159	0.438182	0.0373165	0.283159	0.438182
slr1327	989	757.5	716	495.5	1	slr1327				hypothetical protein	989	757.5	231.5	281.5	0.0106918			716	495.5	220.5	0.0106793		0.998825			slr1327		hypothetical protein	0.0114091	0.981576	0.024395	0.0114091	0.981576
sll1570	1147	776	884	515	1	sll1570				hypothetical protein	1147	776	371	421	0.0159903			884	515	369	0.0178714		1.11764			sll1570		hypothetical protein	0.0162016	1.03695	0.114126	0.0162016	1.03695
slr1362	1023.5	775	777	496	1	slr1362				hypothetical protein	1023.5	775	248.5	298.5	0.0113375			777	496	281	0.0136094		1.20039			slr1362		hypothetical protein	0.0123208	1.08527	0.162807	0.0123208	1.08527
slr1456	1014.5	752.5	752.5	492	1	slr1456		general secretion pathway protein G	pilA4	type 4 pilin-like protein, or general secretion pathway protein G	1014.5	752.5	262	312	0.0118503			752.5	492	260.5	0.0126166		1.06466			slr1456	pilA4	type 4 pilin-like protein, or general secretion pathway protein G	0.0121428	1.07828	0.0192627	0.0121428	1.07828
slr1851	1313	776	1544	472.5	1	slr1851		hypothetical protein		hypothetical protein	1313	776	537	587	0.0222952			1544	472.5	1071.5	0.051895		2.32763			slr1851		hypothetical protein	0.0228684	2.15214	0.248175	0.0228684	2.15214
slr0498	1096	788	759	499.5	1	slr0498				hypothetical protein	1096	788	308	358	0.0135974			759	499.5	259.5	0.0125681		0.924302			slr0498		hypothetical protein	0.0142328	0.917898	0.00905651	0.0142328	0.917898
sll1061	1052.5	798.5	742.5	485.5	1	sll1061				hypothetical protein	1052.5	798.5	254	304	0.0115464			742.5	485.5	257	0.0124471		1.078			sll1061		hypothetical protein	0.0115081	1.07239	0.00793026	0.0115081	1.07239
sll0007	1159	759	879	503.5	1	sll0007		hypothetical protein		hypothetical protein	1159	759	400	450	0.0170917			879	503.5	375.5	0.0181863		1.06404			sll0007		hypothetical protein	0.0162503	1.07313	0.0128558	0.0162503	1.07313
sll0470	1773	777	1688	503	1	sll0470				hypothetical protein	1773	777	996	1046	0.0397288			1688	503	1185	0.057392		1.44459			sll0470		hypothetical protein	0.0370787	1.4076	0.0523239	0.0370787	1.4076
sll1089	1447	781.5	867	493.5	1	sll1089				periplasmic protein, function unknown	1447	781.5	665.5	715.5	0.0271759			867	493.5	373.5	0.0180894		0.665641			sll1089		periplasmic protein, function unknown	0.0263128	0.698986	0.0471561	0.0263128	0.698986
slr0231	989.5	756	682	508	1	slr0231				putative DNA-3-methyladenine glycosidase	989.5	756	233.5	283.5	0.0107678			682	508	174	0.00842719		0.782628			slr0231		putative DNA-3-methyladenine glycosidase	0.0104816	0.83187	0.0696375	0.0104816	0.83187
slr1956	1130	761	768	482.5	1	slr1956				hypothetical protein	1130	761	369	419	0.0159143			768	482.5	285.5	0.0138274		0.868863			slr1956		hypothetical protein	0.0163953	0.815298	0.0757523	0.0163953	0.815298
sll1862	1314	779	3418	494	1	sll1862				hypothetical protein	1314	779	535	585	0.0222193			3418	494	2924	0.141615		6.37354			sll1862		hypothetical protein	0.0216429	5.82924	0.76976	0.0216429	5.82924
sll0838	1591	750	1184	498	1	sll0838	pyrF	orotidine 5' monophosphate decarboxylase	pyrF	orotidine 5'-phosphate decarboxylase	1591	750	841	891	0.0338417			1184	498	686	0.0332244		0.981761			sll0838	pyrF	orotidine 5'-phosphate decarboxylase	0.030727	0.954574	0.0384486	0.030727	0.954574
sll0198	1082	766	765.5	480	1	sll0198				hypothetical protein	1082	766	316	366	0.0139013			765.5	480	285.5	0.0138274		0.994682			sll0198		hypothetical protein	0.0137282	0.85536	0.197032	0.0137282	0.85536
sll1444	3110	779	1975	466	1	sll1444	leuD	3-isopropylmalate dehydratase	leuD	3-isopropylmalate dehydratase small subunit	3110	779	2331	2381	0.0904343			1975	466	1509	0.0730841		0.808145			sll1444	leuD	3-isopropylmalate dehydratase small subunit	0.0784486	0.808975	0.00117371	0.0784486	0.808975
sll0297	3056	769	2183	485	1	sll0297				hypothetical protein	3056	769	2287	2337	0.0887631			2183	485	1698	0.0822377		0.926485			sll0297		hypothetical protein	0.0762227	0.893931	0.046038	0.0762227	0.893931
slr2083	1301	770.5	863	502	1	slr2083	ctaE	cytochrome c oxidase subunit III	ctaE	cytochrome c oxidase subunit III	1301	770.5	530.5	580.5	0.0220484			863	502	361	0.017484		0.792984			slr2083	ctaE	cytochrome c oxidase subunit III	0.0192113	0.795342	0.00333507	0.0192113	0.795342
sll0916	1018.5	789	696.5	465	1	sll0916	cbiC or cobH	precorrin isomerase	cbiC, cobH	precorrin isomerase, precorrin-8X methylmutase	1018.5	789	229.5	279.5	0.0106159			696.5	465	231.5	0.011212		1.05616			sll0916	cbiC, cobH	precorrin isomerase, precorrin-8X methylmutase	0.0101739	0.811896	0.345438	0.0101739	0.811896
slr1549	2502	782	1911	489	1	slr1549	def or fms	polypeptide deformylase	def, fms	polypeptide deformylase	2502	782	1720	1770	0.0672275			1911	489	1422	0.0688705		1.02444			slr1549	def, fms	polypeptide deformylase	0.056476	0.95765	0.0944526	0.056476	0.95765
sll1217	1261	815	865	502.5	1	sll1217				hypothetical protein	1261	815	446	496	0.0188389			865	502.5	362.5	0.0175566		0.931935			sll1217		hypothetical protein	0.0161198	0.849303	0.11686	0.0161198	0.849303
slr1070	1198	786.5	744	469	1	slr1070				hypothetical protein	1198	786.5	411.5	461.5	0.0175285			744	469	275	0.0133188		0.759837			slr1070		hypothetical protein	0.0155225	0.863097	0.146032	0.0155225	0.863097
sll0858	1348	791.5	1020	475	1	sll0858				hypothetical protein	1348	791.5	556.5	606.5	0.0230359			1020	475	545	0.0263955		1.14584			sll0858		hypothetical protein	0.0203133	0.913373	0.328763	0.0203133	0.913373
sll1396	2052	794	1657	487	1	sll1396				hypothetical protein	2052	794	1258	1308	0.04968			1657	487	1170	0.0566656		1.14061			sll1396		hypothetical protein	0.0385883	1.05895	0.115481	0.0385883	1.05895
slr1213	1146	785	783	489	1	slr1213		LumQ gene product	rre14	two-component response regulator (AraC subfamily)	1146	785	361	411	0.0156105			783	489	294	0.014239		0.912147			slr1213	rre14	two-component response regulator (AraC subfamily)	0.0163496	0.86846	0.0617827	0.0163496	0.86846
slr1939	1211	752	844	478.5	1	slr1939				hypothetical protein	1211	752	459	509	0.0193327			844	478.5	365.5	0.0177019		0.915649			slr1939		hypothetical protein	0.019881	0.888702	0.0381087	0.019881	0.888702
slr1378	1683	769	1360	476.5	1	slr1378				hypothetical protein	1683	769	914	964	0.0366143			1360	476.5	883.5	0.0427898		1.16866			slr1378		hypothetical protein	0.0391806	1.09168	0.108867	0.0391806	1.09168
sll1878	4307.5	763	1633	495	1	sll1878		ABC transporter	futC	ABC-type iron transport system ATP-binding protein	4307.5	763	3544.5	3594.5	0.136525			1633	495	1138	0.0551157		0.403704			sll1878	futC	ABC-type iron transport system ATP-binding protein	0.144322	0.389704	0.0197985	0.144322	0.389704
slr0985	1508	767	1080	488.5	1	slr0985	rfbC	dTDP-6-deoxy-L-mannose-dehydrogenase	rfbC	dTDP-4-dehydrorhamnose 3,5-epimerase	1508	767	741	791	0.0300435			1080	488.5	591.5	0.0286476		0.953537			slr0985	rfbC	dTDP-4-dehydrorhamnose 3,5-epimerase	0.0307299	0.917184	0.0514114	0.0307299	0.917184
slr1844	1023	756.5	725	497	1	slr1844	uvrA	excinuclease ABC subunit A	uvrA	excinuclease ABC subunit A	1023	756.5	266.5	316.5	0.0120212			725	497	228	0.0110425		0.918588			slr1844	uvrA	excinuclease ABC subunit A	0.0127592	0.874312	0.0626143	0.0127592	0.874312
slr0362	960.5	761	721	523	1	slr0362		hypothetical protein		hypothetical protein	960.5	761	199.5	249.5	0.00947642			721	523	198	0.00958956		1.01194			slr0362		hypothetical protein	0.00984554	1.0114	0.000765019	0.00984554	1.0114
sll1220	1175	783.5	870	509.5	1	sll1220		potential NAD-reducing hydrogenase subunit	hoxE	putative diaphorase subunit of the bidirectional hydrogenase	1175	783.5	391.5	441.5	0.0167689			870	509.5	360.5	0.0174598		1.0412			sll1220	hoxE	putative diaphorase subunit of the bidirectional hydrogenase	0.0179233	0.929234	0.158343	0.0179233	0.929234
slr0445	1228	773	1038	517	1	slr0445				hypothetical protein	1228	773	455	505	0.0191807			1038	517	521	0.0252331		1.31555			slr0445		hypothetical protein	0.0206739	1.17132	0.203963	0.0206739	1.17132
sll1773	1863	754.5	1430	496.5	1	sll1773		hypothetical protein		hypothetical protein	1863	754.5	1108.5	1158.5	0.0440018			1430	496.5	933.5	0.0452114		1.02749			sll1773		hypothetical protein	0.0436853	0.943492	0.118792	0.0436853	0.943492
slr1467	1364	761.5	1119	527.5	1	slr1467				hypothetical protein	1364	761.5	602.5	652.5	0.024783			1119	527.5	591.5	0.0286476		1.15594			slr1467		hypothetical protein	0.0243247	1.09119	0.0915683	0.0243247	1.09119
slr1024	1211	754.5	878	504	1	slr1024				hypothetical protein	1211	754.5	456.5	506.5	0.0192377			878	504	374	0.0181136		0.941568			slr1024		hypothetical protein	0.0187908	0.977383	0.0506498	0.0187908	0.977383
sll0240	1030	796	687	498	1	sll0240		ABC transporter		putative ABC-type iron transport system ATP-binding protein	1030	796	234	284	0.0107868			687	498	189	0.00915367		0.8486			sll0240		putative ABC-type iron transport system ATP-binding protein	0.00948698	0.924045	0.106696	0.00948698	0.924045
slr1795	1535	770	1068	515.5	1	slr1795	msrA or pms	peptide methionine sulfoxide reductase	msrA, pms	peptide methionine sulfoxide reductase	1535	770	765	815	0.0309551			1068	515.5	552.5	0.0267587		0.864438			slr1795	msrA, pms	peptide methionine sulfoxide reductase	0.0295927	0.859246	0.00734385	0.0295927	0.859246
sll1349	987	795	700	484.5	1	sll1349	cbbZp	phosphoglycolate phosphatase	cbbZp	phosphoglycolate phosphatase	987	795	192	242	0.00919156			700	484.5	215.5	0.0104371		1.13551			sll1349	cbbZp	phosphoglycolate phosphatase	0.0100893	0.946023	0.267977	0.0100893	0.946023
slr0897	1118	787.5	812	499	1	slr0897		endo-1,4-beta-glucanase		endo-1,4-beta-glucanase	1118	787.5	330.5	380.5	0.014452			812	499	313	0.0151592		1.04894			slr0897		endo-1,4-beta-glucanase	0.0147856	1.01106	0.0535597	0.0147856	1.01106
sll1079	1040	755.5	790	503.5	1	sll1079	hypB	hydrogenase expression/formation protein HypB	hypB	putative hydrogenase expression/formation protein HypB	1040	755.5	284.5	334.5	0.0127049			790	503.5	286.5	0.0138758		1.09216			sll1079	hypB	putative hydrogenase expression/formation protein HypB	0.0112184	0.959871	0.18709	0.0112184	0.959871
sll1524	1615	783	1022	496	1	sll1524		hypothetical protein		hypothetical protein	1615	783	832	882	0.0334998			1022	496	526	0.0254753		0.76046			sll1524		hypothetical protein	0.0328732	0.702837	0.0814915	0.0328732	0.702837
sll1939	2027	787.5	1271	508.5	1	sll1939				hypothetical protein	2027	787.5	1239.5	1289.5	0.0489774			1271	508.5	762.5	0.0369295		0.754011			sll1939		hypothetical protein	0.0444545	0.712836	0.0582305	0.0444545	0.712836
slr2060	1186	761.5	880	475.5	1	slr2060				hypothetical protein	1186	761.5	424.5	474.5	0.0180223			880	475.5	404.5	0.0195908		1.08703			slr2060		hypothetical protein	0.0161942	1.09605	0.0127515	0.0161942	1.09605
sll1666	1359	769	927	506	1	sll1666	dnaJ	DnaJ protein	dnaJ	DnaJ-like protein	1359	769	590	640	0.0243083			927	506	421	0.0203899		0.838806			sll1666	dnaJ	DnaJ-like protein	0.0211619	0.838514	0.000412505	0.0211619	0.838514
slr1895	1376	752	1170	477	1	slr1895				hypothetical protein	1376	752	624	674	0.0255996			1170	477	693	0.0335635		1.31109			slr1895		hypothetical protein	0.0243468	1.11998	0.270271	0.0243468	1.11998
slr0191	1254	779.5	953	476	1	slr0191	lytB	amidase enhancer	lytB	amidase enhancer, periplasmic protein	1254	779.5	474.5	524.5	0.0199214			953	476	477	0.0231021		1.15966			slr0191	lytB	amidase enhancer, periplasmic protein	0.0174141	1.05864	0.142867	0.0174141	1.05864
sll1290	1526	776.5	1101	491	1	sll1290	rnb	ribonuclease II	rnb	ribonuclease II	1526	776.5	749.5	799.5	0.0303663			1101	491	610	0.0295436		0.972906			sll1290	rnb	ribonuclease II	0.0265081	0.914977	0.081924	0.0265081	0.914977
sll0682	1347	789	968	477.5	1	sll0682	pstA or phoT	phosphate transport system permease protein PstA	pstA, phoT	ABC-type phosphate transport system permease protein	1347	789	558	608	0.0230929			968	477.5	490.5	0.0237559		1.02871			sll0682	pstA, phoT	ABC-type phosphate transport system permease protein	0.0201294	0.935415	0.131946	0.0201294	0.935415
slr2042	1215	784.5	853	498	1	slr2042				hypothetical protein	1215	784.5	430.5	480.5	0.0182502			853	498	355	0.0171934		0.942094			slr2042		hypothetical protein	0.0172736	0.871788	0.0994286	0.0172736	0.871788
sll0064	1267	789	828	493	1	sll0064				periplasmic protein, putative polar amino acid transport system substrate-binding protein	1267	789	478	528	0.0200543			828	493	335	0.0162248		0.809041			sll0064		periplasmic protein, putative polar amino acid transport system substrate-binding protein	0.0172778	0.74274	0.0937633	0.0172778	0.74274
slr1592	1071	778	732	479	1	slr1592		hypothetical protein		hypothetical protein	1071	778	293	343	0.0130277			732	479	253	0.0122533		0.940558			slr1592		hypothetical protein	0.0130404	0.895463	0.0637743	0.0130404	0.895463
slr0360	1037	777	673	464	1	slr0360				hypothetical protein	1037	777	260	310	0.0117743			673	464	209	0.0101223		0.859694			slr0360		hypothetical protein	0.0111586	0.750595	0.15429	0.0111586	0.750595
slr1087	1461	821	886	466	1	slr1087				hypothetical protein	1461	821	640	690	0.0262073			886	466	420	0.0203415		0.776175			slr1087		hypothetical protein	0.0228549	0.779879	0.00523892	0.0228549	0.779879
slr0161	5637	777	2552	476	1	slr0161	pilT	twitching motility protein	pilT1	twitching motility protein	5637	777	4860	4910	0.18649			2552	476	2076	0.100545		0.539145			slr0161	pilT1	twitching motility protein	0.19292	0.539948	0.00113618	0.19292	0.539948
slr0963	2103	786.5	1770	479	1	slr0963	sir	ferredoxin-sulfite reductase	sir	ferredoxin-sulfite reductase	2103	786.5	1316.5	1366.5	0.0519019			1770	479	1291	0.0625259		1.20469			slr0963	sir	ferredoxin-sulfite reductase	0.0565756	1.15045	0.0767109	0.0565756	1.15045
sll0424	1048	740	768	474	1	sll0424				hypothetical protein	1048	740	308	358	0.0135974			768	474	294	0.014239		1.04719			sll0424		hypothetical protein	0.013808	1.02077	0.0373556	0.013808	1.02077
slr1415	1283	747.5	892	480	1	slr1415				hypothetical protein	1283	747.5	535.5	585.5	0.0222383			892	480	412	0.019954		0.897284			slr1415		hypothetical protein	0.0233226	0.900783	0.00494909	0.0233226	0.900783
sll1556	1033	758	763	509	1	sll1556		hypothetical protein		isopentenyl-diphosphate delta-isomerase	1033	758	275	325	0.012344			763	509	254	0.0123018		0.996574			sll1556		isopentenyl-diphosphate delta-isomerase	0.0133358	1.00637	0.0138462	0.0133358	1.00637
slr1127	3999	733	2892	517	1	slr1127				hypothetical protein	3999	733	3266	3316	0.125947			2892	517	2375	0.115026		0.91329			slr1127		hypothetical protein	0.129842	0.87019	0.0609513	0.129842	0.87019
sll1434	1589	753.5	1067	497.5	1	sll1434	mrcA or ponA	penicillin-binding protein 1B	mrcA, ponA	penicillin-binding protein 1B	1589	753.5	835.5	885.5	0.0336328			1067	497.5	569.5	0.0275821		0.820096			sll1434	mrcA, ponA	penicillin-binding protein 1B	0.0323218	0.796288	0.033669	0.0323218	0.796288
slr0341	1313	765	897	500	1	slr0341				putative polar amino acid transport system substrate-binding protein	1313	765	548	598	0.022713			897	500	397	0.0192275		0.846542			slr0341		putative polar amino acid transport system substrate-binding protein	0.0230773	0.792724	0.0761107	0.0230773	0.792724
sll0602	2032	763	1142	512.5	1	sll0602				hypothetical protein	2032	763	1269	1319	0.0500978			1142	512.5	629.5	0.030488		0.60857			sll0602		hypothetical protein	0.0504407	0.596564	0.0169792	0.0504407	0.596564
sll0998	1888	780.5	1325	527	1	sll0998		LysR transcriptional regulator		transcriptional regulator, LysR family protein, closely related to RbcR	1888	780.5	1107.5	1157.5	0.0439638			1325	527	798	0.0386488		0.879106			sll0998		transcriptional regulator, LysR family protein, closely related to RbcR	0.0443711	0.834154	0.0635722	0.0443711	0.834154
slr0482	1096	751	833	504	1	slr0482				hypothetical protein	1096	751	345	395	0.0150028			833	504	329	0.0159342		1.06208			slr0482		hypothetical protein	0.0154568	0.944753	0.165929	0.0154568	0.944753
slr1053	1187	770.5	854	504.5	1	slr1053				hypothetical protein	1187	770.5	416.5	466.5	0.0177184			854	504.5	349.5	0.016927		0.955333			slr1053		hypothetical protein	0.0187456	0.924156	0.0440911	0.0187456	0.924156
sll0021	1213	784	899	500.5	1	sll0021				hypothetical protein	1213	784	429	479	0.0181932			899	500.5	398.5	0.0193002		1.06085			sll0021		hypothetical protein	0.0195237	0.904248	0.221463	0.0195237	0.904248
slr0678	1997	764	1514	518.5	1	slr0678				putative biopolymer transport ExbD protein	1997	764	1233	1283	0.0487305			1514	518.5	995.5	0.0482142		0.989405			slr0678		putative biopolymer transport ExbD protein	0.0479323	0.953101	0.051342	0.0479323	0.953101
sll0173	1366	761	808	485	1	sll0173			vgb	virginiamycin B hydrolase, periplasmic protein	1366	761	605	655	0.024878			808	485	323	0.0156436		0.628812			sll0173	vgb	virginiamycin B hydrolase, periplasmic protein	0.0228854	0.64306	0.0201506	0.0228854	0.64306
sll0932	1264	768	939	504	1	sll0932				hypothetical protein	1264	768	496	546	0.020738			939	504	435	0.021068		1.01591			sll0932		hypothetical protein	0.0210567	0.978936	0.0522923	0.0210567	0.978936
slr0400	1245	750	867	500	1	slr0400		hypothetical protein		probable inorganic polyphosphate/ATP-NAD kinase 1	1245	750	495	545	0.0207			867	500	367	0.0177746		0.858675			slr0400		probable inorganic polyphosphate/ATP-NAD kinase 1	0.0201109	0.814792	0.0620608	0.0201109	0.814792
slr1293	1038	764	719	486	1	slr1293				similar to phytoene dehydrogenase	1038	764	274	324	0.0123061			719	486	233	0.0112847		0.917002			slr1293		similar to phytoene dehydrogenase	0.013703	0.825197	0.129832	0.013703	0.825197
sll1540	1265	750.5	1026	497.5	1	sll1540	dpm1 or sed3	dolichyl-phosphate-mannose synthase	dpm1, sed3	dolichyl-phosphate-mannose synthase	1265	750.5	514.5	564.5	0.0214406			1026	497.5	528.5	0.0255964		1.19382			sll1540	dpm1, sed3	dolichyl-phosphate-mannose synthase	0.0199985	1.13458	0.0837891	0.0199985	1.13458
slr0244	2621	761	1586	499	1	slr0244				hypothetical protein	2621	761	1860	1910	0.072545			1586	499	1087	0.0526457		0.725697			slr0244		hypothetical protein	0.0664144	0.707768	0.0253557	0.0664144	0.707768
sll1087	1623	766	1090	493	1	sll1087		sodium-coupled permease		sodium-coupled permease	1623	766	857	907	0.0344494			1090	493	597	0.028914		0.839318			sll1087		sodium-coupled permease	0.0306833	0.775931	0.0896432	0.0306833	0.775931
sll1212	2712	762.5	1639	472.5	1	sll1212	rfbD	GDP-D-mannose dehydratase	rfbD	GDP-D-mannose dehydratase	2712	762.5	1949.5	1999.5	0.0759443			1639	472.5	1166.5	0.0564961		0.743914			sll1212	rfbD	GDP-D-mannose dehydratase	0.0658452	0.751667	0.0109646	0.0658452	0.751667
sll1872	1669	767	1101	506.5	1	sll1872	lytR	membrane bound protein LytR	lytR	membrane bound protein LytR	1669	767	902	952	0.0361585			1101	506.5	594.5	0.0287929		0.796296			sll1872	lytR	membrane bound protein LytR	0.0317406	0.757163	0.0553425	0.0317406	0.757163
sll1854	1155	775.5	833	475.5	1	sll1854	xthA or xth	exodeoxyribonuclease III	xthA, xth	exodeoxyribonuclease III	1155	775.5	379.5	429.5	0.0163131			833	475.5	357.5	0.0173145		1.06138			sll1854	xthA, xth	exodeoxyribonuclease III	0.0170968	0.897389	0.231923	0.0170968	0.897389
sll0657	1236	778	855	479.5	1	sll0657	mraY	phospho-N-acetylmuramoyl-pentapeptide-transferase	mraY	phospho-N-acetylmuramoyl-pentapeptide-transferase	1236	778	458	508	0.0192947			855	479.5	375.5	0.0181863		0.942553			sll0657	mraY	phospho-N-acetylmuramoyl-pentapeptide-transferase	0.0193986	0.814756	0.180732	0.0193986	0.814756
sll1441	1217	776	1041	498	1	sll1441	desB	delta 15 desaturase	desB	acyl-lipid desaturase (omega-3)	1217	776	441	491	0.018649			1041	498	543	0.0262986		1.41019			sll1441	desB	acyl-lipid desaturase (omega-3)	0.0168165	1.24604	0.232143	0.0168165	1.24604
sll0798	1154	795.5	821	491	1	sll0798		sensory transduction histidine kinase	nrsS, rppB, hik30	two-component sensor histidine kinase, Ni(II)-sensor and/or redox sensor	1154	795.5	358.5	408.5	0.0155155			821	491	330	0.0159826		1.0301			sll0798	nrsS, rppB, hik30	two-component sensor histidine kinase, Ni(II)-sensor and/or redox sensor	0.0180496	0.923885	0.150217	0.0180496	0.923885
sll1383	1396	799	1147	491.5	1	sll1383	suhB or ssyA	extragenic suppressor SuhB	suhB, ssyA	extragenic suppressor SuhB	1396	799	597	647	0.0245741			1147	491.5	655.5	0.0317472		1.2919			sll1383	suhB, ssyA	extragenic suppressor SuhB	0.0207156	1.21561	0.107892	0.0207156	1.21561
slr0115	1202	798	851	492.5	1	slr0115	ycf27	regulatory components of sensory transduction system	rpaA, ycf27, rre31	response regulator for energy transfer from phycobilisomes to photosystems, two-component response regulator (OmpR subfamily)	1202	798	404	454	0.0172437			851	492.5	358.5	0.0173629		1.00691			slr0115	rpaA, ycf27, rre31	response regulator for energy transfer from phycobilisomes to photosystems, two-component response regulator (OmpR subfamily)	0.015747	0.815029	0.271368	0.015747	0.815029
sll1253	1030	803	613	476	1	sll1253	pcnB	polyA polymerase	pcnB	polyA polymerase	1030	803	227	277	0.0105209			613	476	137	0.0066352		0.630667			sll1253	pcnB	polyA polymerase	0.00910302	0.627715	0.00417513	0.00910302	0.627715
slr0615	1198	765	805	464	1	slr0615		ABC transporter		MDR (multidrug resistance) family ABC transporter	1198	765	433	483	0.0183451			805	464	341	0.0165153		0.900257			slr0615		MDR (multidrug resistance) family ABC transporter	0.0198313	0.869108	0.0440524	0.0198313	0.869108
sll1233	1095	764	728	486	1	sll1233				hypothetical protein	1095	764	331	381	0.014471			728	486	242	0.0117206		0.809934			sll1233		hypothetical protein	0.0149786	0.863366	0.0755638	0.0149786	0.863366
sll0484	1271	749	885	483	1	sll0484		ABC transporter		ABC transport system ATP-binding protein, DevA homolog	1271	749	522	572	0.0217255			885	483	402	0.0194697		0.896168			sll0484		ABC transport system ATP-binding protein, DevA homolog	0.0231435	0.88004	0.0228079	0.0231435	0.88004
sll1414	2165	758	1824	490.5	1	sll1414		hypothetical protein		hypothetical protein	2165	758	1407	1457	0.0553393			1824	490.5	1333.5	0.0645842		1.16706			sll1414		hypothetical protein	0.0575509	1.16255	0.00638174	0.0575509	1.16255
sll0833	1130	743.5	855	489	1	sll0833	appC	oligopeptide transport system permease protein	appC	ABC-type oligopeptide transport system permease protein	1130	743.5	386.5	436.5	0.016579			855	489	366	0.0177262		1.06919			sll0833	appC	ABC-type oligopeptide transport system permease protein	0.0174228	0.968439	0.142487	0.0174228	0.968439
slr2100	1103	735	742	489.5	1	slr2100		regulatory components of sensory transduction system	rre20	two-component response regulator	1103	735	368	418	0.0158763			742	489.5	252.5	0.0122291		0.770273			slr2100	rre20	two-component response regulator	0.0148799	0.811852	0.0588025	0.0148799	0.811852
slr0207	1017	749	769	510	1	slr0207				hypothetical protein	1017	749	268	318	0.0120782			769	510	259	0.0125439		1.03856			slr0207		hypothetical protein	0.0129905	1.04288	0.00611226	0.0129905	1.04288
slr1721	1403	740.5	965	507.5	1	slr1721				hypothetical protein	1403	740.5	662.5	712.5	0.0270619			965	507.5	457.5	0.0221577		0.818777			slr1721		hypothetical protein	0.0268255	0.81229	0.00917344	0.0268255	0.81229
slr0636	1009	759	769	517.5	1	slr0636		hypothetical protein		cobalamin (5'-phosphate) synthase	1009	759	250	300	0.0113945			769	517.5	251.5	0.0121807		1.069			slr0636		cobalamin (5'-phosphate) synthase	0.0125907	1.00165	0.0952428	0.0125907	1.00165
sll1150	1927	767	1330	510.5	1	sll1150				hypothetical protein	1927	767	1160	1210	0.0459578			1330	510.5	819.5	0.0396901		0.863621			sll1150		hypothetical protein	0.0492782	0.794735	0.0974193	0.0492782	0.794735
slr0700	964	728.5	754	497.5	1	slr0700				hypothetical protein	964	728.5	235.5	285.5	0.0108438			754	497.5	256.5	0.0124228		1.14562			slr0700		hypothetical protein	0.0121995	0.988912	0.221619	0.0121995	0.988912
slr1278	1064	749.5	770	523	1	slr1278		hypothetical protein	ycf62	hypothetical protein	1064	749.5	314.5	364.5	0.0138443			770	523	247	0.0119627		0.86409			slr1278	ycf62	hypothetical protein	0.0130046	0.960422	0.136234	0.0130046	0.960422
sll0284	1085	724	765	495	1	sll0284				hypothetical protein	1085	724	361	411	0.0156105			765	495	270	0.0130767		0.837686			sll0284		hypothetical protein	0.0153745	0.889472	0.0732356	0.0153745	0.889472
sll1869	1158	758	834	490.5	1	sll1869	cbaB	3-chlorobenzoate-3,4-dioxygenase	cbaB	probable dioxygenase, Rieske iron-sulfur component	1158	758	400	450	0.0170917			834	490.5	343.5	0.0166364		0.97336			sll1869	cbaB	probable dioxygenase, Rieske iron-sulfur component	0.0177178	0.998908	0.0361295	0.0177178	0.998908
sll0102	1135	756.5	818	502	1	sll0102				hypothetical protein	1135	756.5	378.5	428.5	0.0162751			818	502	316	0.0153045		0.940363			sll0102		hypothetical protein	0.0181205	0.904596	0.050583	0.0181205	0.904596
slr0807	1469	750	1038	508	1	slr0807	gcp	sialoglycoprotease	gcp	O-sialoglycoprotein endopeptidase	1469	750	719	769	0.0292079			1038	508	530	0.025669		0.878838			slr0807	gcp	O-sialoglycoprotein endopeptidase	0.0278695	0.868984	0.0139355	0.0278695	0.868984
sll0474	1040	768.5	744	495.5	1	sll0474		sensory transduction histidine kinase	hik28	two-component hybrid histidine kinase	1040	768.5	271.5	321.5	0.0122111			744	495.5	248.5	0.0120354		0.985609			sll0474	hik28	two-component hybrid histidine kinase	0.0131342	0.946381	0.0554768	0.0131342	0.946381
slr2107	1108	768.5	829	484	1	slr2107	kpsM	polysialic acid transport protein KpsM	rfbA, kpsM	putative O-antigen export system permease protein, ABC transporter permease protein, putative polysialic acid transport system permease protein	1108	768.5	339.5	389.5	0.0147939			829	484	345	0.0167091		1.12946			slr2107	rfbA, kpsM	putative O-antigen export system permease protein, ABC transporter permease protein, putative polysialic acid transport system permease protein	0.013518	1.05393	0.10682	0.013518	1.05393
sll0085	1105	769.5	815	506	1	sll0085				hypothetical protein	1105	769.5	335.5	385.5	0.0146419			815	506	309	0.0149655		1.0221			sll0085		hypothetical protein	0.0152571	0.998954	0.0327332	0.0152571	0.998954
sll1424	1185	765	853	499	1	sll1424		hypothetical protein		hypothetical protein	1185	765	420	470	0.0178514			853	499	354	0.017145		0.960428			sll1424		hypothetical protein	0.0167267	0.929418	0.0438547	0.0167267	0.929418
slr0918	1255	772.5	918	478	1	slr0918	map, pepM	methionine aminopeptidase	map, pepM	putative methionine aminopeptidase A	1255	772.5	482.5	532.5	0.0202252			918	478	440	0.0213101		1.05364			slr0918	map, pepM	putative methionine aminopeptidase A	0.0197963	1.00465	0.0692827	0.0197963	1.00465
slr0261	2744	762.5	2059	479.5	1	slr0261	ndhH	NADH dehydrogenase subunit 7	ndhH	NADH dehydrogenase I chain D	2744	762.5	1981.5	2031.5	0.0771597			2059	479.5	1579.5	0.0764985		0.99143			slr0261	ndhH	NADH dehydrogenase I chain D	0.0703051	0.964795	0.0376678	0.0703051	0.964795
sll0374	1229	756.5	946	464	1	sll0374	braG or livF or livG	high-affinity branched-chain amino acid transport ATP-binding protein	urtE, braG, livF, livG	ABC-type urea transport system ATP-binding protein, branched-chain amino acid transport system ATP-binding protein	1229	756.5	472.5	522.5	0.0198454			946	464	482	0.0233443		1.17631			sll0374	urtE, braG, livF, livG	ABC-type urea transport system ATP-binding protein, branched-chain amino acid transport system ATP-binding protein	0.0175885	1.02339	0.216256	0.0175885	1.02339
slr1991	1375	795.5	1087	497	1	slr1991	cyaA	adenylate cyclase	cya1	adenylate cyclase	1375	795.5	579.5	629.5	0.0239095			1087	497	590	0.0285749		1.19513			slr1991	cya1	adenylate cyclase	0.0227197	1.10473	0.127844	0.0227197	1.10473
sll0683	1225	803	812	483	1	sll0683	pstB or phoT	phosphate transport ATP-binding protein PstB	pstB, phoT	ABC-type phosphate transport system ATP-binding protein	1225	803	422	472	0.0179273			812	483	329	0.0159342		0.888819			sll0683	pstB, phoT	ABC-type phosphate transport system ATP-binding protein	0.0182129	0.825372	0.0897275	0.0182129	0.825372
slr0861	1392	766.5	1006	478.5	1	slr0861	purT	glycinamide ribonucleotide transformylase	purT	phosphoribosylglycinamide formyltransferase 2	1392	766.5	625.5	675.5	0.0256566			1006	478.5	527.5	0.0255479		0.995764			slr0861	purT	phosphoribosylglycinamide formyltransferase 2	0.0221451	0.991065	0.00664595	0.0221451	0.991065
slr1919	1256	790.5	888	471	1	slr1919		ABC1-like		ABC1-like	1256	790.5	465.5	515.5	0.0195795			888	471	417	0.0201962		1.03149			slr1919		ABC1-like	0.0170115	0.94826	0.117711	0.0170115	0.94826
slr1556	1173	786	792	490.5	1	slr1556	ddh	2-hydroxyaciddehydrogenase	ddh	2-hydroxyaciddehydrogenase	1173	786	387	437	0.016598			792	490.5	301.5	0.0146023		0.879762			slr1556	ddh	2-hydroxyaciddehydrogenase	0.0137442	0.930536	0.0718054	0.0137442	0.930536
slr2032	4212	823	2543	492.5	1	slr2032	ycf23	hypothetical protein	ycf23	hypothetical protein	4212	823	3389	3439	0.130619			2543	492.5	2050.5	0.09931		0.760304			slr2032	ycf23	hypothetical protein	0.102953	0.72851	0.0449633	0.102953	0.72851
slr1428	1286	821	795	490.5	1	slr1428				hypothetical protein	1286	821	465	515	0.0195606			795	490.5	304.5	0.0147476		0.753945			slr1428		hypothetical protein	0.0164227	0.783082	0.041206	0.0164227	0.783082
slr1604	3153	769.5	2117	471.5	1	slr1604	ftsH	cell division protein FtsH	ftsH	cell division protein FtsH	3153	769.5	2383.5	2433.5	0.0924284			2117	471.5	1645.5	0.079695		0.862236			slr1604	ftsH	cell division protein FtsH	0.0942848	0.859374	0.00404682	0.0942848	0.859374
slr0536	3034	766	2064	463	1	slr0536	hemE	uroporphyrinogen decarboxylase	hemE	uroporphyrinogen decarboxylase	3034	766	2268	2318	0.0880415			2064	463	1601	0.0775398		0.880719			slr0536	hemE	uroporphyrinogen decarboxylase	0.0925355	0.831706	0.0693144	0.0925355	0.831706
slr1076	1298	746.5	870	486.5	1	slr1076				hypothetical protein	1298	746.5	551.5	601.5	0.022846			870	486.5	383.5	0.0185737		0.812997			slr1076		hypothetical protein	0.0245147	0.77374	0.0555181	0.0245147	0.77374
sll0043	1092	737	776	487	1	sll0043	cheA	chemotaxis protein CheA	pixL, taxAY1, cheA, hik18	positive phototaxis protein, homologous to chemotaxis protein CheA, two-component hybrid histidine kinase	1092	737	355	405	0.0153826			776	487	289	0.0139969		0.909918			sll0043	pixL, taxAY1, cheA, hik18	positive phototaxis protein, homologous to chemotaxis protein CheA, two-component hybrid histidine kinase	0.014604	0.984287	0.105174	0.014604	0.984287
slr0962	1819	735	1379	506	1	slr0962				hypothetical protein	1819	735	1084	1134	0.0430712			1379	506	873	0.0422812		0.981659			slr0962		hypothetical protein	0.0438089	0.934131	0.0672149	0.0438089	0.934131
slr0788	1075	745.5	829	511	1	slr0788		pre-B cell enhancing factor		pre-B cell enhancing factor	1075	745.5	329.5	379.5	0.014414			829	511	318	0.0154014		1.0685			slr0788		pre-B cell enhancing factor	0.0152301	0.979065	0.126481	0.0152301	0.979065
slr1772	1174	734	856	489.5	1	slr1772				penicillin acylase homolog, periplasmic protein	1174	734	440	490	0.018611			856	489.5	366.5	0.0177504		0.953756			slr1772		penicillin acylase homolog, periplasmic protein	0.0192402	0.797776	0.220589	0.0192402	0.797776
slr0108	976	735.5	742	500	1	slr0108				hypothetical protein	976	735.5	240.5	290.5	0.0110337			742	500	242	0.0117206		1.06225			slr0108		hypothetical protein	0.0114641	1.03353	0.0406171	0.0114641	1.03353
slr1416	1374	771	1024	508	1	slr1416	morR	MorR protein	morR	MorR protein	1374	771	603	653	0.024802			1024	508	516	0.024991		1.00762			slr1416	morR	MorR protein	0.0254734	0.95996	0.0673988	0.0254734	0.95996
slr0510	886	788	630	522	1	slr0510		hypothetical protein		hypothetical protein	886	788	98	148	0.00562129			630	522	108	0.00523067		0.930511			slr0510		hypothetical protein	0.00587118	0.884868	0.0645481	0.00587118	0.884868
slr0743	1855	778.5	1798	523.5	1	slr0743	nusA	N utilization substance protein	nusA	N utilization substance protein	1855	778.5	1076.5	1126.5	0.0427863			1798	523.5	1274.5	0.0617267		1.44267			slr0743	nusA	N utilization substance protein	0.0422569	1.36007	0.116817	0.0422569	1.36007
slr0074	1503	756.5	1840	519	1	slr0074	ycf24	ABC transporter subunit	ycf24	ABC transporter subunit	1503	756.5	746.5	796.5	0.0302524			1840	519	1321	0.0639788		2.11483			slr0074	ycf24	ABC transporter subunit	0.029753	2.00425	0.156393	0.029753	2.00425
slr2048	1475	760.5	1171	495.5	1	slr2048		hypothetical protein		periplasmic protein	1475	760.5	714.5	764.5	0.029037			1171	495.5	675.5	0.0327159		1.1267			slr2048		periplasmic protein	0.0295219	1.00682	0.169536	0.0295219	1.00682
slr0658	1291	779.5	1158	478.5	1	slr0658				hypothetical protein	1291	779.5	511.5	561.5	0.0213267			1158	478.5	679.5	0.0329096		1.54312			slr0658		hypothetical protein	0.0226255	1.27706	0.37626	0.0226255	1.27706
sll1004	1027	746	718	518	1	sll1004				hypothetical protein	1027	746	281	331	0.0125719			718	518	200	0.00968642		0.77048			sll1004		hypothetical protein	0.0129863	0.85237	0.115809	0.0129863	0.85237
slr0545	1049	753	706	497	1	slr0545		auxin-induced protein		auxin-induced protein	1049	753	296	346	0.0131417			706	497	209	0.0101223		0.770246			slr0545		auxin-induced protein	0.0126147	0.784472	0.0201182	0.0126147	0.784472
sll0644	1034	749	732	463.5	1	sll0644		esterase		esterase	1034	749	285	335	0.0127239			732	463.5	268.5	0.013004		1.02202			sll0644		esterase	0.0130237	0.981816	0.0568557	0.0130237	0.981816
sll0518	2877	753	1957	513.5	1	sll0518				hypothetical protein	2877	753	2124	2174	0.0825721			1957	513.5	1443.5	0.0699117		0.846675			sll0518		hypothetical protein	0.0777614	0.782852	0.0902587	0.0777614	0.782852
slr0976	1927	740.5	1113	493	1	slr0976				hypothetical protein	1927	740.5	1186.5	1236.5	0.0469643			1113	493	620	0.0300279		0.639377			slr0976		hypothetical protein	0.043979	0.603054	0.0513678	0.043979	0.603054
sll0784	932	756	819	498.5	1	sll0784		nitrilase	merR	nitrilase	932	756	176	226	0.00858386			819	498.5	320.5	0.0155225		1.80834			sll0784	merR	nitrilase	0.00850137	1.67531	0.188121	0.00850137	1.67531
slr1291	1683	785	1027	484	1	slr1291	ndhD2	NADH dehydrogenase subunit 4	ndhD2	NADH dehydrogenase I chain M, Involved in photosystem-1 cyclic electron flow	1683	785	898	948	0.0360066			1027	484	543	0.0262986		0.730383			slr1291	ndhD2	NADH dehydrogenase I chain M, Involved in photosystem-1 cyclic electron flow	0.0335184	0.691711	0.0546909	0.0335184	0.691711
slr0302	963.5	767	650.5	441	1	slr0302	pleD	PleD gene product	pleD	PleD gene product	963.5	767	196.5	246.5	0.00936248			650.5	441	209.5	0.0101465		1.08374			slr0302	pleD	PleD gene product	0.00941203	0.997495	0.121974	0.00941203	0.997495
slr1104	1520	765	1037	483	1	slr1104		hypothetical protein		hypothetical protein	1520	765	755	805	0.0305752			1037	483	554	0.0268314		0.877553			slr1104		hypothetical protein	0.0267091	0.835426	0.0595757	0.0267091	0.835426
slr0617	1419	783.5	856	495	1	slr0617				hypothetical protein	1419	783.5	635.5	685.5	0.0260364			856	495	361	0.017484		0.67152			slr0617		hypothetical protein	0.0228467	0.68639	0.0210286	0.0228467	0.68639
sll0220	1678	790.5	1250	470.5	1	sll0220	glmS	L-glutamine:D-fructose-6-P amidotransferase	glmS	glucosamine--fructose-6-phosphate aminotransferase	1678	790.5	887.5	937.5	0.0356078			1250	470.5	779.5	0.0377528		1.06024			sll0220	glmS	glucosamine--fructose-6-phosphate aminotransferase	0.0312915	0.980843	0.112285	0.0312915	0.980843
slr0082	2972	756	2529	477	1	slr0082		hypothetical protein		salt-regulated gene, function unknown	2972	756	2216	2266	0.0860664			2529	477	2052	0.0993827		1.15472			slr0082		salt-regulated gene, function unknown	0.0711573	1.04157	0.160025	0.0711573	1.04157
slr1128	4063	772	2230	488	1	slr1128		erthyrocyte band 7 integral membrane protein, protein 7.2B, stomatin		erthyrocyte band 7 integral membrane protein, protein 7.2B, stomatin	4063	772	3291	3341	0.126897			2230	488	1742	0.0843687		0.664861			slr1128		erthyrocyte band 7 integral membrane protein, protein 7.2B, stomatin	0.104423	0.630578	0.0484845	0.104423	0.630578
slr0839	2509	777.5	1520	477	1	slr0839	hemH	ferrochelatase	hemH, scpA	ferrochelatase	2509	777.5	1731.5	1781.5	0.0676643			1520	477	1043	0.0505147		0.746548			slr0839	hemH, scpA	ferrochelatase	0.0546766	0.728077	0.0261223	0.0546766	0.728077
slr0286	969	807.5	620	487	1	slr0286				involved in functional assembly of photosystem II	969	807.5	161.5	211.5	0.00803312			620	487	133	0.00644147		0.801864			slr0286		involved in functional assembly of photosystem II	0.00694193	0.800224	0.00231861	0.00694193	0.800224
slr2052	3633	794	1558	471.5	1	slr2052				hypothetical protein	3633	794	2839	2889	0.109729			1558	471.5	1086.5	0.0526215		0.479558			slr2052		hypothetical protein	0.0855181	0.468624	0.0154637	0.0855181	0.468624
sll0910	953	753.5	725	466.5	1	sll0910		hypothetical protein		hypothetical protein	953	753.5	199.5	249.5	0.00947642			725	466.5	258.5	0.0125197		1.32114			sll0910		hypothetical protein	0.00914074	1.3935	0.102326	0.00914074	1.3935
sll1005	983	744	693	474	1	sll1005		regulatory protein for beta-lactamase		regulatory protein for beta-lactamase	983	744	239	289	0.0109767			693	474	219	0.0106066		0.966286			sll1005		regulatory protein for beta-lactamase	0.0115322	0.881424	0.120013	0.0115322	0.881424
sll1433	1841	731	1537	462.5	1	sll1433		hypothetical protein		hypothetical protein	1841	731	1110	1160	0.0440587			1537	462.5	1074.5	0.0520403		1.18116			sll1433		hypothetical protein	0.0443606	1.16682	0.0202757	0.0443606	1.16682
slr1590	1850	717	1195	490	1	slr1590				hypothetical protein	1850	717	1133	1183	0.0449323			1195	490	705	0.0341446		0.759913			slr1590		hypothetical protein	0.0466801	0.731228	0.0405665	0.0466801	0.731228
slr1474	1062	719.5	869	504	1	slr1474				hypothetical protein	1062	719.5	342.5	392.5	0.0149078			869	504	365	0.0176777		1.1858			slr1474		hypothetical protein	0.0155156	1.17568	0.0143228	0.0155156	1.17568
slr1077	1785	733.5	1088	502	1	slr1077				hypothetical protein	1785	733.5	1051.5	1101.5	0.0418368			1088	502	586	0.0283812		0.678379			slr1077		hypothetical protein	0.0416373	0.677765	0.00086906	0.0416373	0.677765
slr1336	1237	731	1006	489.5	1	slr1336		H+/Ca2+ exchanger		H+/Ca2+ exchanger	1237	731	506	556	0.0211178			1006	489.5	516.5	0.0250152		1.18455			slr1336		H+/Ca2+ exchanger	0.0221638	1.12557	0.0834102	0.0221638	1.12557
slr1299	1262	745	974	511.5	1	slr1299		UDP-glucose dehydrogenase		UDP-glucose dehydrogenase	1262	745	517	567	0.0215356			974	511.5	462.5	0.0223998		1.04013			slr1299		UDP-glucose dehydrogenase	0.0232127	0.954622	0.120928	0.0232127	0.954622
sll1226	1239	765	895	503.5	1	sll1226	hoxH	hydrogenase large subunit	hoxH	hydrogenase subunit of the bidirectional hydrogenase	1239	765	474	524	0.0199024			895	503.5	391.5	0.0189612		0.952708			sll1226	hoxH	hydrogenase subunit of the bidirectional hydrogenase	0.0201658	0.948929	0.00534389	0.0201658	0.948929
slr1784	1174	733	937	490	1	slr1784		biliverdin reductase	bvdR	biliverdin reductase	1174	733	441	491	0.018649			937	490	447	0.0216492		1.16087			slr1784	bvdR	biliverdin reductase	0.0192302	1.0684	0.130774	0.0192302	1.0684
slr2089	1206	735	987	495	1	slr2089	shc	squalene-hopene-cyclase	shc	squalene-hopene-cyclase	1206	735	471	521	0.0197884			987	495	492	0.0238286		1.20417			slr2089	shc	squalene-hopene-cyclase	0.0202054	1.11154	0.130992	0.0202054	1.11154
slr0734	922	748	675	512	1	slr0734				putative oxidoreductase	922	748	174	224	0.00850789			675	512	163	0.00789443		0.927895			slr0734		putative oxidoreductase	0.00866613	0.956859	0.0409609	0.00866613	0.956859
slr2004	1115	754.5	777	491	1	slr2004				periplasmic protein, function unknown	1115	754.5	360.5	410.5	0.0155915			777	491	286	0.0138516		0.888408			slr2004		periplasmic protein, function unknown	0.0174021	0.81839	0.0990205	0.0174021	0.81839
sll1401	963.5	771	668	488	1	sll1401				hypothetical protein	963.5	771	192.5	242.5	0.00921055			668	488	180	0.00871778		0.946499			sll1401		hypothetical protein	0.00989604	0.883089	0.0896752	0.00989604	0.883089
sll1528	1214	761.5	879	489	1	sll1528				hypothetical protein	1214	761.5	452.5	502.5	0.0190858			879	489	390	0.0188885		0.989664			sll1528		hypothetical protein	0.0190817	0.937294	0.0740627	0.0190817	0.937294
slr1849	1109	728	943	497.5	1	slr1849	merA	mercuric reductase	merA	mercuric reductase	1109	728	381	431	0.0163701			943	497.5	445.5	0.0215765		1.31804			slr1849	merA	mercuric reductase	0.0161888	1.24682	0.100726	0.0161888	1.24682
slr1692	1161	737	831	479.5	1	slr1692		hypothetical protein		hypothetical protein	1161	737	424	474	0.0180033			831	479.5	351.5	0.0170239		0.945598			slr1692		hypothetical protein	0.0166675	0.979592	0.0480759	0.0166675	0.979592
slr1044	1559	746.5	1126	478	1	slr1044	mcpA	methyl-accepting chemotaxis protein	ctr1, mcpA	methyl-accepting chemotaxis protein, required for the biogenesis of thick pili	1559	746.5	812.5	862.5	0.0327592			1126	478	648	0.031384		0.958022			slr1044	ctr1, mcpA	methyl-accepting chemotaxis protein, required for the biogenesis of thick pili	0.0314505	0.91835	0.0561046	0.0314505	0.91835
slr1277	3463	737	2114	482.5	1	slr1277	gspD	general secretion pathway protein D	pilQ, gspD	pilus assembly protein homologous to general secretion pathway protein D	3463	737	2726	2776	0.105437			2114	482.5	1631.5	0.079017		0.749423			slr1277	pilQ, gspD	pilus assembly protein homologous to general secretion pathway protein D	0.0986458	0.723891	0.0361081	0.0986458	0.723891
sll0645	1294	733.5	956	479	1	sll0645				hypothetical protein	1294	733.5	560.5	610.5	0.0231878			956	479	477	0.0231021		0.996305			sll0645		hypothetical protein	0.0226389	1.01233	0.022661	0.0226389	1.01233
sll1899	1592	741.5	1080	496	1	sll1899	ctaB	cytochrome c oxidase folding protein	ctaB	protoheme IX farnesyltransferase	1592	741.5	850.5	900.5	0.0342025			1080	496	584	0.0282844		0.826968			sll1899	ctaB	protoheme IX farnesyltransferase	0.0306661	0.824532	0.00344474	0.0306661	0.824532
slr1619	1560	745	1063	466.5	1	slr1619				hypothetical protein	1560	745	815	865	0.0328541			1063	466.5	596.5	0.0288898		0.879334			slr1619		hypothetical protein	0.0311215	0.831414	0.0677693	0.0311215	0.831414
sll0815	1012	757	736	484	1	sll0815				hypothetical protein	1012	757	255	305	0.0115844			736	484	252	0.0122049		1.05356			sll0815		hypothetical protein	0.0116429	1.05623	0.00377249	0.0116429	1.05623
slr1793	3486	768.5	1727	474	1	slr1793	talB	transaldolase	talB, tal	transaldolase	3486	768.5	2717.5	2767.5	0.105114			1727	474	1253	0.0606854		0.577328			slr1793	talB, tal	transaldolase	0.0904517	0.543944	0.047212	0.0904517	0.543944
slr2115	922	740.5	650	469.5	1	slr2115				hypothetical protein	922	740.5	181.5	231.5	0.00879275			650	469.5	180.5	0.008742		0.994227			slr2115		hypothetical protein	0.00778517	1.01129	0.0241299	0.00778517	1.01129
sll0219	1058	763.5	736	475	1	sll0219		potential FMN-protein		potential FMN-protein	1058	763.5	294.5	344.5	0.0130847			736	475	261	0.0126408		0.966075			sll0219		potential FMN-protein	0.0135613	0.88575	0.113597	0.0135613	0.88575
sll1594	1308	762	953	491.5	1	sll1594	rbcR	rubisco operon transcriptional regulator	ndhR	ndhF3 operon transcriptional regulator, LysR family protein	1308	762	546	596	0.0226371			953	491.5	461.5	0.0223514		0.987381			sll1594	ndhR	ndhF3 operon transcriptional regulator, LysR family protein	0.0203553	0.923599	0.0902018	0.0203553	0.923599
slr1120	1332	774.5	942	489	1	slr1120	hofD or hopD	type 4 prepilin peptidase	pilD, hofD, hopD	prepilin peptidase / N-methyltransferase	1332	774.5	557.5	607.5	0.0230739			942	489	453	0.0219397		0.950848			slr1120	pilD, hofD, hopD	prepilin peptidase / N-methyltransferase	0.0203999	0.826386	0.176017	0.0203999	0.826386
slr1250	1110	763	748	488	1	slr1250	pstB or phoT	phosphate transport ATP-binding protein PstB	pstB, phoT	ABC-type phosphate transport system ATP-binding protein	1110	763	347	397	0.0150787			748	488	260	0.0125923		0.835107			slr1250	pstB, phoT	ABC-type phosphate transport system ATP-binding protein	0.0134963	0.935396	0.14183	0.0134963	0.935396
sll1204	989	758	667	459	1	sll1204		hypothetical protein		hypothetical protein	989	758	231	281	0.0106728			667	459	208	0.0100739		0.943879			sll1204		hypothetical protein	0.0106465	0.82803	0.163836	0.0106465	0.82803
slr1583	1979	711	1181	469.5	1	slr1583				hypothetical protein	1979	711	1268	1318	0.0500598			1181	469.5	711.5	0.0344594		0.688365			slr1583		hypothetical protein	0.0488383	0.646683	0.0589472	0.0488383	0.646683
slr0623	2451	700.5	1572	467	1	slr0623	trxA	thioredoxin	trxA	thioredoxin	2451	700.5	1750.5	1800.5	0.068386			1572	467	1105	0.0535175		0.78258			slr0623	trxA	thioredoxin	0.0729951	0.708457	0.104826	0.0729951	0.708457
slr0334	976	707	748	457	1	slr0334				hypothetical protein	976	707	269	319	0.0121162			748	457	291	0.0140937		1.16322			slr0334		hypothetical protein	0.00997787	1.24345	0.113467	0.00997787	1.24345
slr1025	933	752	640.5	460	1	slr1025				hypothetical protein	933	752	181	231	0.00877376			640.5	460	180.5	0.008742		0.996379			slr1025		hypothetical protein	0.00842254	0.881976	0.16179	0.00842254	0.881976
sll0101	900	736	638	478	1	sll0101				hypothetical protein	900	736	164	214	0.00812808			638	478	160	0.00774914		0.953379			sll0101		hypothetical protein	0.00838933	1.04217	0.125567	0.00838933	1.04217
slr0233	1358	757.5	933	523.5	1	slr0233	trxM	thioredoxin M	trxM	thioredoxin M	1358	757.5	600.5	650.5	0.0247071			933	523.5	409.5	0.0198329		0.802724			slr0233	trxM	thioredoxin M	0.0278976	0.767545	0.0497507	0.0278976	0.767545
slr0946	870	721	677	488	1	slr0946	arsC	arsenate reductase	arsC	arsenate reductase	870	721	149	199	0.00755835			677	488	189	0.00915367		1.21107			slr0946	arsC	arsenate reductase	0.00951405	0.960003	0.355058	0.00951405	0.960003
ssr3410	970	705	718	494	1	ssr3410				hypothetical protein	970	705	265	315	0.0119642			718	494	224	0.0108488		0.906769			ssr3410		hypothetical protein	0.012779	0.873052	0.0476841	0.012779	0.873052
slr1234	1577	711	1144	475.5	1	slr1234		protein kinase C inhibitor		HIT family protein	1577	711	866	916	0.0347912			1144	475.5	668.5	0.0323769		0.930605			slr1234		HIT family protein	0.0385973	0.803778	0.17936	0.0385973	0.803778
sll1504	882	709	670.5	466	1	sll1504				hypothetical protein	882	709	173	223	0.00846991			670.5	466	204.5	0.00990437		1.16936			sll1504		hypothetical protein	0.0104043	1.01356	0.22033	0.0104043	1.01356
slr1203	1039	702	845	487	1	slr1203		hypothetical protein		hypothetical protein	1039	702	337	387	0.0146989			845	487	358	0.0173387		1.17959			slr1203		hypothetical protein	0.0164248	1.1672	0.0175176	0.0164248	1.1672
ssr0693	920	689	690	488	1	ssr0693				hypothetical protein	920	689	231	281	0.0106728			690	488	202	0.00978329		0.916652			ssr0693		hypothetical protein	0.0108299	0.977562	0.0861404	0.0108299	0.977562
slr1162	927	699	705	475	1	slr1162		hypothetical protein		hypothetical protein	927	699	228	278	0.0105589			705	475	230	0.0111394		1.05498			slr1162		hypothetical protein	0.0122791	1.03734	0.0249439	0.0122791	1.03734
slr2117	857	662	640	471	1	slr2117				hypothetical protein	857	662	195	245	0.00930551			640	471	169	0.00818503		0.879589			slr2117		hypothetical protein	0.00997248	0.932321	0.074574	0.00997248	0.932321
slr0899	1182	683	902	454	1	slr0899	cynS or cnt	cyanate lyase	cynS	cyanate lyase	1182	683	499	549	0.0208519			902	454	448	0.0216976		1.04056			slr0899	cynS	cyanate lyase	0.0209206	0.966102	0.105293	0.0209206	0.966102
ssl3573	989	717	644	450	1	ssl3573				hypothetical protein	989	717	272	322	0.0122301			644	450	194	0.00939583		0.768255			ssl3573		hypothetical protein	0.0116761	0.883128	0.162455	0.0116761	0.883128
sll0630	1071	702	774	461.5	1	sll0630				hypothetical protein	1071	702	369	419	0.0159143			774	461.5	312.5	0.015135		0.951033			sll0630		hypothetical protein	0.0174091	0.859914	0.128861	0.0174091	0.859914
sll1806	2574	731	2578	485	1	sll1806	rpl14	50S ribosomal protein L14	rplN, rpl14	50S ribosomal protein L14	2574	731	1843	1893	0.0718993			2578	485	2093	0.101368		1.40987			sll1806	rplN, rpl14	50S ribosomal protein L14	0.0685342	1.27156	0.195591	0.0685342	1.27156
slr0356	996	709	789	477	1	slr0356				hypothetical protein	996	709	287	337	0.0127998			789	477	312	0.0151108		1.18055			slr0356		hypothetical protein	0.0131389	1.09495	0.121058	0.0131389	1.09495
sll0082	984	701	701	456	1	sll0082				hypothetical protein	984	701	283	333	0.0126479			701	456	245	0.0118659		0.938169			sll0082		hypothetical protein	0.013507	0.80869	0.183112	0.013507	0.80869
sll1533	1288	731	883	467.5	1	sll1533	pilT	twitching mobility protein	pilT2	twitching mobility protein	1288	731	557	607	0.0230549			883	467.5	415.5	0.0201235		0.872854			sll1533	pilT2	twitching mobility protein	0.0222248	0.892503	0.0277877	0.0222248	0.892503
smr0001	2316	736	944	451	1	smr0001	psbT	photosystem II PsbT protein	psbT, psbTc, ycf8	photosystem II PsbT protein	2316	736	1580	1630	0.0619101			944	451	493	0.023877		0.385673			smr0001	psbT, psbTc, ycf8	photosystem II PsbT protein	0.0609232	0.362528	0.0327319	0.0609232	0.362528
sll1099	8056	758	7635	468	1	sll1099	tufA	protein synthesis elongation factor Tu	tufA, tuf	elongation factor EF-Tu	8056	758	7298	7348	0.279089			7635	468	7167	0.347113		1.24373			sll1099	tufA, tuf	elongation factor EF-Tu	0.274662	1.19764	0.0651905	0.274662	1.19764
slr1253	1168	738.5	819	463.5	1	slr1253				hypothetical protein	1168	738.5	429.5	479.5	0.0182122			819	463.5	355.5	0.0172176		0.945389			slr1253		hypothetical protein	0.0182491	0.932901	0.0176604	0.0182491	0.932901
sll0170	2852	738	4767	457.5	1	sll0170	dnaK	DnaK protein	dnaK2, dnaK	DnaK protein 2, heat shock protein 70, molecular chaperone	2852	738	2114	2164	0.0821923			4767	457.5	4309.5	0.208718		2.53939			sll0170	dnaK2, dnaK	DnaK protein 2, heat shock protein 70, molecular chaperone	0.0784308	2.16214	0.533506	0.0784308	2.16214
slr0588	960	749	666	438	1	slr0588				hypothetical protein	960	749	211	261	0.00991321			666	438	228	0.0110425		1.11392			slr0588		hypothetical protein	0.0103053	1.07578	0.0539425	0.0103053	1.07578
slr1875	1142	750	789	446.5	1	slr1875	exoD	exopolysaccharide synthesis protein ExoD	exoD	exopolysaccharide synthesis protein ExoD	1142	750	392	442	0.0167879			789	446.5	342.5	0.016588		0.988093			slr1875	exoD	exopolysaccharide synthesis protein ExoD	0.0174887	0.953857	0.0484163	0.0174887	0.953857
sml0007	1036	731	747	452.5	1	sml0007	ycf32	ycf32 gene product	psbY, ycf32	photosystem II protein Y	1036	731	305	355	0.0134835			747	452.5	294.5	0.0142633		1.05783			sml0007	psbY, ycf32	photosystem II protein Y	0.0140986	1.00611	0.073139	0.0140986	1.00611
sll1308	979	714	661	436.5	1	sll1308		hypothetical protein		hypothetical protein	979	714	265	315	0.0119642			661	436.5	224.5	0.010873		0.908793			sll1308		hypothetical protein	0.0125087	0.869693	0.0552968	0.0125087	0.869693
ssr2799	1820	716	1444	475	1	ssr2799	rpl27	50S ribosomal protein L27	rpmA, rpl27	50S ribosomal protein L27	1820	716	1104	1154	0.0438308			1444	475	969	0.0469307		1.07072			ssr2799	rpmA, rpl27	50S ribosomal protein L27	0.0488037	0.981301	0.126463	0.0488037	0.981301
slr1148	934	711	681	479.5	1	slr1148				hypothetical protein	934	711	223	273	0.010369			681	479.5	201.5	0.00975907		0.941178			slr1148		hypothetical protein	0.0110063	0.984936	0.0618825	0.0110063	0.984936
sll1096	3050	731.5	3373	495.5	1	sll1096	rps12	30S ribosomal protein S12	rpsL, rps12	30S ribosomal protein S12	3050	731.5	2318.5	2368.5	0.0899596			3373	495.5	2877.5	0.139363		1.54918			sll1096	rpsL, rps12	30S ribosomal protein S12	0.098988	1.50766	0.0587125	0.098988	1.50766
slr2059	1056	722	787	467	1	slr2059				putative ferredoxin	1056	722	334	384	0.014585			787	467	320	0.0154983		1.06262			slr2059		putative ferredoxin	0.0159624	0.986854	0.10715	0.0159624	0.986854
slr0587	1103	709	711	458.5	1	slr0587				hypothetical protein	1103	709	394	444	0.0168639			711	458.5	252.5	0.0122291		0.725167			slr0587		hypothetical protein	0.0187817	0.649409	0.107137	0.0187817	0.649409
slr1187	2541	726	1478	497	1	slr1187				hypothetical protein	2541	726	1815	1865	0.0708358			1478	497	981	0.0475119		0.670733			slr1187		hypothetical protein	0.0781688	0.632144	0.0545729	0.0781688	0.632144
slr1421	1047	722.5	791	481.5	1	slr1421				hypothetical protein	1047	722.5	324.5	374.5	0.0142241			791	481.5	309.5	0.0149897		1.05382			slr1421		hypothetical protein	0.0137159	1.15821	0.147618	0.0137159	1.15821
slr0772	1298	705.5	857	470.5	1	slr0772	chlB	protochlorophyllide reductase ChlB subunit	chlB	light-independent protochlorophyllide reductase subunit B	1298	705.5	592.5	642.5	0.0244032			857	470.5	386.5	0.018719		0.767071			slr0772	chlB	light-independent protochlorophyllide reductase subunit B	0.0262781	0.727378	0.0561354	0.0262781	0.727378
smr0003	929	719.5	710	486	1	smr0003	petM	cytochrome b6-f complex subunit PetM	petM	cytochrome b6-f complex subunit PetM	929	719.5	209.5	259.5	0.00985624			710	486	224	0.0108488		1.1007			smr0003	petM	cytochrome b6-f complex subunit PetM	0.0109044	1.09136	0.0132161	0.0109044	1.09136
slr1216	995.5	705	720	488	1	slr1216	mgtE	Mg2+ transporter	mgtE	Mg2+ transporter	995.5	705	290.5	340.5	0.0129328			720	488	232	0.0112362		0.868821			slr1216	mgtE	Mg2+ transporter	0.0130316	0.81974	0.0694109	0.0130316	0.81974
ssl2084	2175	694	1516	486.5	1	ssl2084	acp	acyl carrier protein	acpP, acp	acyl carrier protein	2175	694	1481	1531	0.0581499			1516	486.5	1029.5	0.0498609		0.857453			ssl2084	acpP, acp	acyl carrier protein	0.0636966	0.789223	0.0964918	0.0636966	0.789223
slr1830	1159	687.5	843	470.5	1	slr1830	phbC	poly(3-hydroxyalkanoate) synthase	phaC, phbC	poly(3-hydroxyalkanoate) synthase	1159	687.5	471.5	521.5	0.0198074			843	470.5	372.5	0.018041		0.910817			slr1830	phaC, phbC	poly(3-hydroxyalkanoate) synthase	0.0207652	0.863002	0.0676216	0.0207652	0.863002
sll0757	1434	683	1241	473	1	sll0757	purF	amidophosphoribosyltransferase	purF	amidophosphoribosyltransferase	1434	683	751	801	0.0304233			1241	473	768	0.0371959		1.22261			sll0757	purF	amidophosphoribosyltransferase	0.0331211	1.11758	0.148533	0.0331211	1.11758
ssl1378	924.5	678	674.5	452.5	1	ssl1378				hypothetical protein	924.5	678	246.5	296.5	0.0112616			674.5	452.5	222	0.0107519		0.954746			ssl1378		hypothetical protein	0.0132773	0.892609	0.0878746	0.0132773	0.892609
sll0306	2033	677	7937	463	1	sll0306	rpoD	RNA polymerase sigma factor	sigB, rpoD	RNA polymerase group 2 sigma factor	2033	677	1356	1406	0.0534022			7937	463	7474	0.361982		6.7784			sll0306	sigB, rpoD	RNA polymerase group 2 sigma factor	0.0551824	6.46737	0.439861	0.0551824	6.46737
ssl0750	1038	704.5	774	446	1	ssl0750				hypothetical protein	1038	704.5	333.5	383.5	0.014566			774	446	328	0.0158857		1.09061			ssl0750		hypothetical protein	0.0147847	1.02189	0.0971764	0.0147847	1.02189
sll1503	923	678	693	466	1	sll1503				hypothetical protein	923	678	245	295	0.0112046			693	466	227	0.0109941		0.981213			sll1503		hypothetical protein	0.0121482	0.869186	0.158431	0.0121482	0.869186
ssl3580	942	672	689	458	1	ssl3580	hypC	hydrogenase expression/formation protein HypC	hypC	putative hydrogenase expression/formation protein HypC	942	672	270	320	0.0121541			689	458	231	0.0111878		0.920495			ssl3580	hypC	putative hydrogenase expression/formation protein HypC	0.0127098	0.885434	0.0495832	0.0127098	0.885434
sll0068	1589	706	1011	456	1	sll0068				hypothetical protein	1589	706	883	933	0.0354369			1011	456	555	0.0268798		0.758526			sll0068		hypothetical protein	0.0337356	0.748329	0.0144208	0.0337356	0.748329
ssr2049	1169	711	825	489	1	ssr2049	bchB or bchK	protochlorophillide reductase 57 kD subunit	bchB, bchK	protochlorophillide reductase 57 kD subunit	1169	711	458	508	0.0192947			825	489	336	0.0162732		0.843403			ssr2049	bchB, bchK	protochlorophillide reductase 57 kD subunit	0.0187517	0.826445	0.0239824	0.0187517	0.826445
sll1107	1089	674	876	470	1	sll1107				hypothetical protein	1089	674	415	465	0.0176615			876	470	406	0.0196634		1.11335			sll1107		hypothetical protein	0.0162262	1.03749	0.107284	0.0162262	1.03749
ssr1765	1015	688	732	450.5	1	ssr1765		hypothetical protein		hypothetical protein	1015	688	327	377	0.0143191			732	450.5	281.5	0.0136336		0.95213			ssr1765		hypothetical protein	0.0140916	0.82052	0.186125	0.0140916	0.82052
slr0210	1013	690	723	465	1	slr0210		sensory transduction histidine kinase	hik9	two-component sensor histidine kinase	1013	690	323	373	0.0141672			723	465	258	0.0124955		0.882003			slr0210	hik9	two-component sensor histidine kinase	0.0129536	0.942323	0.0853052	0.0129536	0.942323
slr1576	1147	737	771	445	1	slr1576				hypothetical protein	1147	737	410	460	0.0174716			771	445	326	0.0157889		0.903689			slr1576		hypothetical protein	0.0162085	0.902646	0.00147624	0.0162085	0.902646
sll0244	1169	746.5	774	437.5	1	sll0244	galE or galD	UDP-glucose 4-epimerase	galE, galD	UDP-glucose 4-epimerase	1169	746.5	422.5	472.5	0.0179463			774	437.5	336.5	0.0162974		0.908119			sll0244	galE, galD	UDP-glucose 4-epimerase	0.0167162	0.875786	0.045725	0.0167162	0.875786
sll0376	1089	727	772	450	1	sll0376				hypothetical protein	1089	727	362	412	0.0156484			772	450	322	0.0155951		0.996594			sll0376		hypothetical protein	0.0162045	0.892577	0.147101	0.0162045	0.892577
[truncated: 4,582 more rows]

## Sheet: Delta-sll1252 vs WT 5µmol light
	∆sll1252 versus Wild-type grown at illumination of 5 µmol /m2/ S, DNA microarray raw data
[truncated: 6,188 more rows]
